# Supplementary material for: Metal-free approach for hindered amide-bond formation with hypervalent iodine(iii) reagents: application to hindered peptide synthesis
Source: Royal Society of Chemistry journal article supplement (doi:10.1039/d0gc03912h), 2020-12-25

**Metal-Free Approach for Hindered Amide-Bond Formation with  
Hypervalent Iodine(III) Reagents: Application to Hindered Peptide Synthesis**

Hyo-Jun Lee,<sup>1,2</sup> Xiao Huang,<sup>1</sup> Shigeyoshi Sakaki,<sup>3</sup> and Keiji Maruoka\*<sup>1,4</sup>

<sup>1</sup>Laboratory of Organocatalytic Chemistry, Graduate School of Pharmaceutical Sciences, Kyoto University, Kyoto, 606-8501, Japan.

<sup>2</sup>Current address: Department of Chemistry, Kunsan National University, Gunsan 54150, Republic of Korea.

<sup>3</sup>Fukui Institute for Fundamental Chemistry, Kyoto University, Kyoto 606-8103, Japan.

<sup>4</sup>Guangdong University of Technology, Guangzhou 510006, China.

**Supplementary Information**

## Table of Contents

|                                                                                                        |             |
|--------------------------------------------------------------------------------------------------------|-------------|
| <b>1. General Information</b>                                                                          | <b>S3</b>   |
| <b>2. Preparation of Ester Substrates</b>                                                              | <b>S4</b>   |
| <b>2-1. General Procedures</b>                                                                         | <b>S4</b>   |
| <b>2-2. Ester Substrates</b>                                                                           | <b>S5</b>   |
| <b>3. Optimization Studies of Acyl Fluoride Intermediate Generation</b>                                | <b>S15</b>  |
| <b>3-1. General Procedures for Acyl Fluoride Generation</b>                                            | <b>S15</b>  |
| <b>3-2. Evaluation of Reaction Conditions</b>                                                          | <b>S15</b>  |
| <b>4. Direct Amidation vs Amidation via Acyl Fluoride Intermediate</b>                                 | <b>S17</b>  |
| <b>5. Generation of Acyl Fluoride Intermediate</b>                                                     | <b>S18</b>  |
| <b>5-1. General Procedures</b>                                                                         | <b>S18</b>  |
| <b>5-2. Determination of NMR yield</b>                                                                 | <b>S18</b>  |
| <b>5-3. Purification of Acyl Fluoride 5</b>                                                            | <b>S29</b>  |
| <b>6. Computational Mechanism Study</b>                                                                | <b>S30</b>  |
| <b>6-1. Computational Details</b>                                                                      | <b>S30</b>  |
| <b>6-2. Discussion of Ligand Exchange Reaction of Hypervalent Iodine Reagent PhI(OPiv)<sub>2</sub></b> | <b>S31</b>  |
| <b>6-3. Discussion of Reaction of HF Molecule with Aromatic Intermediate</b>                           | <b>S36</b>  |
| <b>6-4. Cartesian Coordinates</b>                                                                      | <b>S41</b>  |
| <b>7. Hypervalent I(III)-Promoted Amide (or Ester) Formation</b>                                       | <b>S63</b>  |
| <b>7-1. General Procedures</b>                                                                         | <b>S63</b>  |
| <b>7-2. Amide (or Ester) Products</b>                                                                  | <b>S65</b>  |
| <b>8. Racemization Studies</b>                                                                         | <b>S104</b> |
| <b>9. References</b>                                                                                   | <b>S106</b> |
| <b>10. Spectral data</b>                                                                               | <b>S107</b> |

## 1. General Information:

$^1\text{H}$  NMR spectra were measured on a JEOL JNM-FX400 (400 MHz) or a JEOL JNM-FX500 (500 MHz) spectrometer. Data were reported as follows: chemical shifts in ppm from tetramethylsilane as an internal standard, integration, multiplicity (s = singlet, d = doublet, t = triplet, q = quartet, dd = double-doublet, m = multiplet, br = broad and app = apparent), coupling constants (Hz), and assignment.  $^{13}\text{C}$  NMR spectra were measured on a JEOL JNM-FX400 (100 MHz) or a JEOL JNM-FX500 (125 MHz) spectrometer with complete proton decoupling. Chemical shifts were reported in ppm from the residual solvent as an internal standard. High performance liquid chromatography (HPLC) was performed on Shimadzu 20A instruments using Daicel Chiralpak IA and IG 4.6 mm x 25cm columns. The high-resolution mass spectra (HRMS) were performed on Thermo Scientific EXACTIVE PLUS. For thin layer chromatography (TLC) analysis throughout this work, Merck precoated TLC plates (silica gel 60 GF254, 0.25 mm) were used. The products were purified by flash column chromatography on silica gel 60N (Kanto Chemical Co. Inc., 40-50). Acetonitrile (MeCN), THF, and dichloromethane (DCM) were purchased from Wako Pure Chemistry Co. Inc. as "Dehydrated" and used as received.  $\text{PhI}(\text{OPiv})_2$  was purchased from TCI.  $\text{Py}\bullet\text{9HF}$  was purchased from Sigma-Aldrich. All the other chemicals were purchased and used as received.

## 2. Preparation of Ester Substrates

### 2-1. General Procedures

**General Procedure A:** To a solution of carboxylic acid (3.0 mmol) in CH<sub>2</sub>Cl<sub>2</sub> (10 mL) was added oxalyl chloride (3.5 mmol, 1.2 equiv.), two drops of DMF was then added dropwise. The resulting mixture was stirred at room temperature for 3 h and then concentrated in vacuo. The residue was dissolved in MeCN (10 mL) and treated sequentially with hydroquinone (6.0 mmol, 2 equiv.) and Et<sub>3</sub>N (4.5 mmol, 1.5 equiv.) at 0 °C. The reaction mixture was stirred at room temperature for overnight. After quenched with water, the mixture was extracted with ethyl acetate, dried over Na<sub>2</sub>SO<sub>4</sub>, and concentrated in vacuo. The residue was purified by flash column chromatography on silica gel with CH<sub>2</sub>Cl<sub>2</sub>-ethyl acetate as eluent.

**General Procedure B:** To a solution of carboxylic acid (2.0 mmol) in CH<sub>2</sub>Cl<sub>2</sub> (10 mL) was added 4-((*tert*-butyldimethylsilyl)oxy)phenol (3.0 mmol, 1.5 equiv.) and *N*-(3-dimethylaminopropyl)-*N'*-ethylcarbodiimide hydrochloride (3.0 mmol, 1.5 equiv.). The resulting mixture was stirred at room temperature for 24 h and then filtered through short silica column. After washed with hexane/ethyl acetate mixture (2/1) several times, the filtrate was concentrated in vacuo. The residue was dissolved in THF (9.0 mL) and treated with Py•9HF (1.0 mL). The mixture was stirred at room temperature for 1 h. After quenched with 1 M aqueous solution of HCl, the mixture was extracted with ethyl acetate, dried over Na<sub>2</sub>SO<sub>4</sub>, and concentrated in vacuo. The residue was purified by flash column chromatography on silica gel with CH<sub>2</sub>Cl<sub>2</sub>-ethyl acetate as eluent.

## 2-2. Ester Substrates

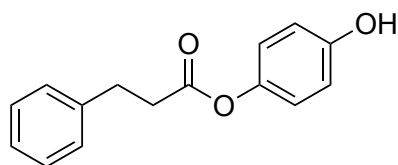

### 4-Hydroxyphenyl 3-phenylpropanoate (1a)

White solid. Prepared following general procedure A using 3-phenylpropanoic acid.

**<sup>1</sup>H NMR (400 MHz, CDCl<sub>3</sub>)**  $\delta$  7.33-7.30 (m, 2H), 7.26-7.21 (m, 3H), 5.30 (d,  $J$  = 7.6 Hz, 1H), 3.06 (t,  $J$  = 7.6 Hz, 2H), 2.86 (t,  $J$  = 7.6 Hz, 2H).

**<sup>13</sup>C NMR (100 MHz, CDCl<sub>3</sub>)**  $\delta$  172.3, 153.3, 143.9, 140.0, 128.4, 128.3, 126.4, 122.3, 116.0, 35.9, 30.9.

**HRMS (ESI-TOF)** Calcd. for C<sub>15</sub>H<sub>14</sub>O<sub>3</sub>Na: 265.0835 ([M + Na]<sup>+</sup>), Found: 265.0838.

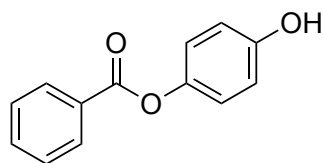

### 4-Hydroxyphenyl benzoate (6m)

White solid. Prepared following general procedure A using benzoic acid.

**<sup>1</sup>H NMR (400 MHz, CDCl<sub>3</sub>)**  $\delta$  8.18 (d,  $J$  = 8.4 Hz, 2H), 7.62 (m, 1H), 7.50 (d,  $J$  = 8.4 Hz, 2H), 7.06-7.02 (m, 2H), 6.84-4.80 (m, 2H), 5.09 (s, 1H).

**<sup>13</sup>C NMR (100 MHz, CDCl<sub>3</sub>)**  $\delta$  165.8, 153.3, 144.3, 133.6, 130.1, 129.4, 128.5, 122.5, 116.0.

**HRMS (ESI-TOF)** Calcd. for C<sub>13</sub>H<sub>10</sub>O<sub>3</sub>Na: 237.0522 ([M + Na]<sup>+</sup>), Found: 237.0526.

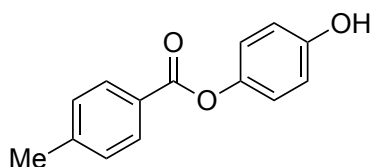

#### 4-Hydroxyphenyl 4-methylbenzoate (6n)

White solid. Prepared following general procedure A using 4-methylbenzoic acid

**<sup>1</sup>H NMR (400 MHz, CDCl<sub>3</sub>)** δ 8.07 (d, *J* = 8.0 Hz, 2H), 7.29 (d, *J* = 8.0 Hz, 2H), 7.01-6.97 (m, 2H), 6.77-6.73 (m, 2H), 5.88 (s, 1H), 2.44 (s, 3H).

**<sup>13</sup>C NMR (100 MHz, CDCl<sub>3</sub>)** δ 166.3, 153.6, 144.5, 144.0, 130.2, 129.2, 126.5, 122.4, 116.2, 21.7.

**HRMS** (ESI-TOF) Calcd. for C<sub>14</sub>H<sub>12</sub>O<sub>3</sub>Na: 251.0679 ([M + Na]<sup>+</sup>), Found: 251.0681.

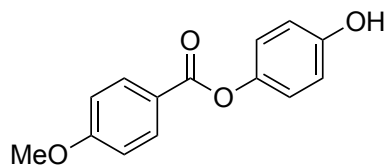

#### 4-Hydroxyphenyl 4-methoxybenzoate (6o)

White solid. Prepared following general procedure A using 4-methoxybenzoic acid

**<sup>1</sup>H NMR (400 MHz, CDCl<sub>3</sub>)** δ 8.12 (d, *J* = 9.2 Hz, 2H), 7.07-7.02 (m, 2H), 6.97-6.95 (m, 2H), 6.85-6.81 (m, 2H), 4.91 (s, 1H), 3.88 (s, 3H).

**<sup>13</sup>C NMR (100 MHz, CDCl<sub>3</sub>)** δ 165.7, 163.8, 153.3, 144.3, 132.2, 122.6, 121.7, 116.1, 113.8, 55.5.

**HRMS** (ESI-TOF) Calcd. for C<sub>14</sub>H<sub>12</sub>O<sub>4</sub>Na: 268.0628 ([M + Na]<sup>+</sup>), Found: 267.0633.

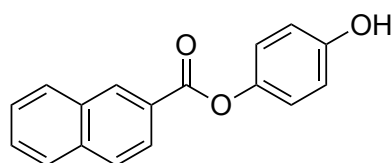

#### 4-Hydroxyphenyl 2-naphthoate (6p)

White solid. Prepared following general procedure A using 2-naphthoic acid.

**<sup>1</sup>H NMR (400 MHz, DMSO-*d*<sub>6</sub>)**  $\delta$  9.51 (s, 1H), 8.77 (s, 1H), 8.15-8.03 (m, 1H), 8.01-7.97 (m, 3H), 7.68-7.58 (m, 2H), 7.08 (d, *J* = 8.8 Hz, 2H), 6.80 (d, *J* = 8.8 Hz, 2H).

**<sup>13</sup>C NMR (100 MHz, DMSO-*d*<sub>6</sub>)**  $\delta$  165.6, 155.7, 143.3, 135.8, 132.6, 131.8, 130.0, 129.4, 129.0, 128.2, 127.6, 126.9, 125.5, 123.1, 116.2.

**HRMS (ESI-TOF)** Calcd. for C<sub>17</sub>H<sub>12</sub>O<sub>3</sub>Na: 287.0679 ([M + Na]<sup>+</sup>), Found: 287.0686.

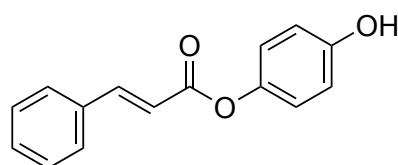

#### 4-Hydroxyphenyl cinnamate (6q)

White solid. Prepared following general procedure A using cinnamic acid.

**<sup>1</sup>H NMR (400 MHz, CDCl<sub>3</sub>)**  $\delta$  7.85 (d, *J* = 16.0 Hz, 1H), 7.58-7.55 (m, 2H), 7.42-7.40 (m, 3H), 7.01 (d, *J* = 8.8 Hz, 2H), 6.81 (d, *J* = 8.8 Hz, 2H), 6.61 (d, *J* = 16.0 Hz, 1H), 4.89 (s, 1H).

**<sup>13</sup>C NMR (100 MHz, CDCl<sub>3</sub>)**  $\delta$  166.0, 153.2, 146.5, 144.2, 134.1, 130.7, 128.9, 128.2, 122.5, 117.2, 116.0.

**HRMS (ESI-TOF)** Calcd. for C<sub>15</sub>H<sub>12</sub>O<sub>3</sub>Na: 263.0679 ([M + Na]<sup>+</sup>), Found: 263.0683.

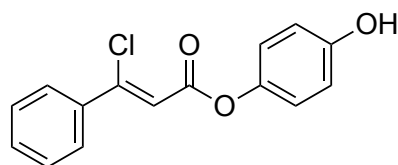

**4-Hydroxyphenyl (Z)-3-chloro-3-phenylacrylate (6r)**

White solid. Prepared following general procedure A using 3-phenylpropionic acid.

**<sup>1</sup>H NMR (400 MHz, CDCl<sub>3</sub>)** δ 7.75-7.72 (m, 2H), 7.49-7.41 (m, 3H), 7.04-7.00 (m, 2H), 6.83-6.79 (m, 2H), 6.75 (s, 1H), 4.82 (s, 1H).

**<sup>13</sup>C NMR (100 MHz, CDCl<sub>3</sub>)** δ 163.1, 153.3, 148.9, 143.8, 137.0, 131.0, 128.7, 127.3, 122.4, 115.9, 115.3.

**HRMS (ESI-TOF)** Calcd. for C<sub>15</sub>H<sub>11</sub>O<sub>3</sub>ClNa: 297.0289 ([M + Na]<sup>+</sup>), Found: 297.0293.

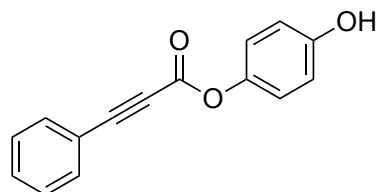

**4-Hydroxyphenyl 3-phenylpropiolate (6s)**

White solid. Prepared following general procedure B using 3-phenylpropionic acid.

**<sup>1</sup>H NMR (400 MHz, CDCl<sub>3</sub>)** δ 7.61 (d, *J* = 7.2 Hz, 2H), 7.47 (t, *J* = 8.0 Hz, 1H), 7.39 (t, *J* = 8.0 Hz, 2H), 7.03 (d, *J* = 8.8 Hz, 2H), 6.81 (d, *J* = 8.8 Hz, 2H), 5.25 (s, 1H).

**<sup>13</sup>C NMR (100 MHz, CDCl<sub>3</sub>)** δ 163.1, 153.3, 148.9, 143.8, 137.0, 131.0, 128.7, 127.3, 122.4, 115.9, 115.3.

**HRMS (ESI-TOF)** Calcd. for C<sub>15</sub>H<sub>10</sub>O<sub>3</sub>Na: 261.0522 ([M + Na]<sup>+</sup>), Found: 261.0526.

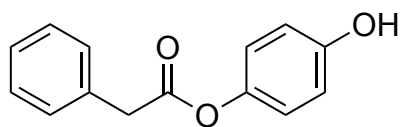

#### 4-Hydroxyphenyl 2-phenylacetate (6t)

White solid. Prepared following general procedure A using phenylacetic acid.

**<sup>1</sup>H NMR (400 MHz, CDCl<sub>3</sub>)** δ 7.36-7.24 (m, 5H), 6.85 (d, *J* = 8.4 Hz, 2H), 6.69 (d, *J* = 8.4 Hz, 2H), 5.33 (s, 1H), 3.83 (s, 2H).

**<sup>13</sup>C NMR (100 MHz, CDCl<sub>3</sub>)** δ 170.9, 153.4, 143.9, 133.3, 129.2, 128.7, 127.3, 122.4, 115.9, 41.3.

**HRMS** (ESI-TOF) Calcd. for C<sub>14</sub>H<sub>12</sub>O<sub>2</sub>Na: 251.0679 ([M + Na]<sup>+</sup>), Found: 251.0681.

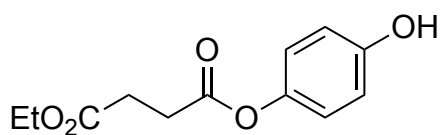

#### Ethyl (4-hydroxyphenyl) succinate (6u)

White solid. Prepared following general procedure A using 4-ethoxy-4-oxobutanoic acid.

**<sup>1</sup>H NMR (400 MHz, CDCl<sub>3</sub>)** δ 6.86 (d, *J* = 8.8 Hz, 2H), 6.71 (d, *J* = 8.8 Hz, 2H), 5.87 (s, 1H), 4.16 (t, *J* = 7.2 Hz, 2H), 2.86-2.83 (m, 2H), 2.73-2.70 (m, 2H), 1.25 (d, *J* = 6.8 Hz, 3H).

**<sup>13</sup>C NMR (100 MHz, CDCl<sub>3</sub>)** δ 172.5, 171.8, 153.6, 143.7, 122.2, 115.9, 61.0, 29.1, 29.1, 14.1.

**HRMS** (ESI-TOF) Calcd. for C<sub>12</sub>H<sub>14</sub>O<sub>5</sub>Na: 261.0733 ([M + Na]<sup>+</sup>), Found: 261.0740.

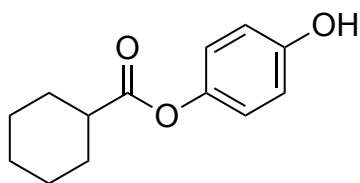

#### 4-Hydroxyphenyl cyclohexanecarboxylate (6v)

White solid. Prepared following general procedure A using cyclohexanecarboxylic acid.

**$^1\text{H}$  NMR (400 MHz,  $\text{CDCl}_3$ )**  $\delta$  6.83 (d,  $J$  = 8.4 Hz, 2H), 6.81 (d,  $J$  = 8.4 Hz, 2H), 5.91 (s, 1H), 2.57-2.48 (m, 1H), 2.05-2.01 (m, 2H), 1.82-1.78 (m, 2H), 1.69-1.65 (m, 1H), 1.60-1.51 (m, 2H), 1.39-1.21 (m, 3H).

**$^{13}\text{C}$  NMR (100 MHz,  $\text{CDCl}_3$ )**  $\delta$  176.0, 153.4, 143.8, 122.2, 116.0, 43.1, 28.9, 25.6, 25.2.

**HRMS** (ESI-TOF) Calcd. for  $\text{C}_{13}\text{H}_{16}\text{O}_3\text{Na}$ : 243.0992 ( $[\text{M} + \text{Na}]^+$ ), Found: 243.0995.

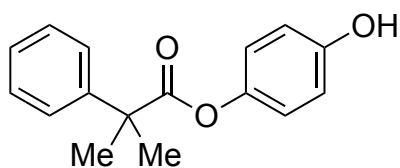

#### 4-Hydroxyphenyl 2-methyl-2-phenylpropanoate (6w)

White solid. Prepared following general procedure A using 2-methyl-2-phenylpropanoic acid.

**$^1\text{H}$  NMR (400 MHz,  $\text{CDCl}_3$ )**  $\delta$  7.44-7.42 (m, 2H), 7.39-7.34 (m, 2H), 7.29-7.25 (m, 1H), 5.13 (brs, 1H), 1.70 (s, 6H).

**$^{13}\text{C}$  NMR (100 MHz,  $\text{CDCl}_3$ )**  $\delta$  176.1, 153.2, 144.3, 144.0, 128.5, 126.9, 125.5, 122.1, 115.9, 46.7, 26.3.

**HRMS** (ESI-TOF) Calcd. for  $\text{C}_{16}\text{H}_{16}\text{O}_3\text{Na}$ : 279.0992 ( $[\text{M} + \text{Na}]^+$ ), Found: 279.0998.

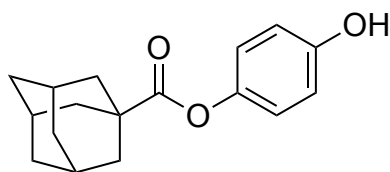

**4-Hydroxyphenyl (3r,5r,7r)-adamantane-1-carboxylate (6y)**

White solid. Prepared following general procedure A using 1-adamantanecarboxylic acid.

**<sup>1</sup>H NMR (400 MHz, CDCl<sub>3</sub>)** δ 6.83-6.80 (m, 2H), 6.70-6.67 (m, 2H), 5.59 (brs, 1H), 2.06 (s, 3H), 2.02 (s, 6H), 1.74 (s, 6H).

**<sup>13</sup>C NMR (100 MHz, CDCl<sub>3</sub>)** δ 177.4, 153.3, 144.1, 122.2, 116.0, 40.9, 38.6, 38.5, 36.3, 36.3, 27.8, 27.7.

**HRMS** (ESI-TOF) Calcd. for C<sub>17</sub>H<sub>20</sub>O<sub>3</sub>Na: 295.1305 ([M + Na]<sup>+</sup>), Found: 295.1313.

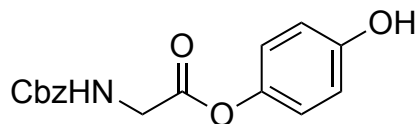

**4-Hydroxyphenyl ((benzyloxy)carbonyl)glycinate (10a)**

White solid. Prepared following general procedure B using *N*-Cbz-L-Ala-OH.

**<sup>1</sup>H NMR (500 MHz, CDCl<sub>3</sub>)** δ 7.36-7.31 (m, 5H), 6.95 (d, *J* = 9.0 Hz, 2H), 6.80 (d, *J* = 9.0 Hz, 2H), 5.29 (brs, 1H), 5.15 (s, 2H), 4.88 (brs, 1H), 4.22 (d, *J* = 5.5 Hz, 2H).

**<sup>13</sup>C NMR (100 MHz, CD<sub>3</sub>OD)** δ 172.3, 156.0, 154.0, 143.6, 136.0, 128.6, 128.4, 128.2, 122.1, 116.1, 67.3, 49.9, 18.5.

**HRMS** (ESI-TOF) Calcd. for C<sub>16</sub>H<sub>15</sub>NO<sub>5</sub>Na: 324.0842 ([M + Na]<sup>+</sup>), Found: 324.085.

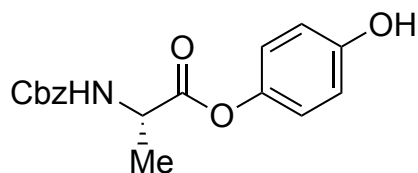

#### 4-Hydroxyphenyl ((benzyloxy)carbonyl)-L-alaninate (10b)

White solid. Prepared following general procedure B using *N*-Cbz-L-Ala-OH.

**<sup>1</sup>H NMR (400 MHz, CDCl<sub>3</sub>)** δ 7.46-7.30 (m, 5H), 6.86 (d, *J* = 10.5 Hz, 2H), 6.74 (d, *J* = 10.5 Hz, 2H), 6.07 (s, 1H), 5.43 (d, *J* = 9.0 Hz, 1H), 5.13 (s, 2H), 4.58 (t, *J* = 9.0 Hz, 1H), 1.50 (d, *J* = 9.0 Hz, 3H).

**<sup>13</sup>C NMR (100 MHz, CD<sub>3</sub>OD)** δ 172.2, 155.9, 153.9, 143.5, 135.9, 128.5, 128.2, 128.1, 122.0, 116.0, 67.2, 49.8, 18.3.

**HRMS** (ESI-TOF) Calcd. for C<sub>17</sub>H<sub>16</sub>NO<sub>5</sub>Na: 338.0999 ([M + Na]<sup>+</sup>), Found: 338.1006.

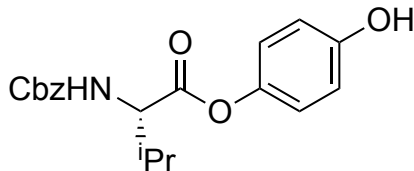

#### 4-Hydroxyphenyl ((benzyloxy)carbonyl)-L-valinate (10c)

White solid. Prepared following general procedure B using *N*-Cbz-Val-OH.

**<sup>1</sup>H NMR (400 MHz, CDCl<sub>3</sub>)** δ 7.54-7.33 (m, 5H), 6.87 (d, *J* = 10.5 Hz, 2H), 6.75 (d, *J* = 10.5 Hz, 2H), 5.92 (s, 1H), 5.38 (d, *J* = 10.5 Hz, 1H), 5.13 (s, 2H), 4.52-4.48 (m, 1H), 2.34-2.31 (m, 1H), 1.06 (d, *J* = 8.5 Hz, 3H), 0.99 (d, *J* = 8.5 Hz, 3H).

**<sup>13</sup>C NMR (100 MHz, CD<sub>3</sub>OD)** δ 171.3, 156.6, 154.0, 143.3, 135.8, 128.5, 128.2, 128.0, 122.0, 116.0, 67.3, 59.1, 31.1, 18.9, 17.5.

**HRMS** (ESI-TOF) Calcd. for C<sub>19</sub>H<sub>21</sub>NO<sub>5</sub>Na: 366.1312 ([M + Na]<sup>+</sup>), Found: 366.1330.

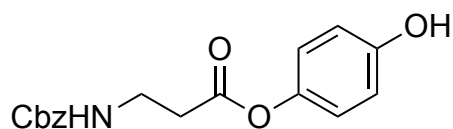

**4-Hydroxyphenyl 3-(((benzyloxy)carbonyl)amino)propanoate (10e)**

White solid. Prepared following general procedure B using *N*-Cbz- $\beta$ -Ala-OH.

**$^1\text{H}$  NMR (400 MHz,  $\text{CDCl}_3$ )**  $\delta$  7.37-7.28 (m, 5H), 6.91 (d,  $J$  = 8.8 Hz, 2H), 6.78 (d,  $J$  = 8.8 Hz, 2H), 5.28 (s, 1H), 5.10 (s, 2H), 4.94 (s, 1H), 3.55 (q,  $J$  = 6.0 Hz, 2H), 2.78 (d,  $J$  = 6.0 Hz, 2H).

**$^{13}\text{C}$  NMR (100 MHz,  $\text{CD}_3\text{OD}$ )**  $\delta$  172.5, 158.7, 156.3, 144.6, 138.3, 129.4, 128.9, 128.7, 123.4, 116.5, 67.4, 37.7, 35.5.

**HRMS** (ESI-TOF) Calcd. for  $\text{C}_{17}\text{H}_{17}\text{NO}_5\text{Na}$ : 338.0999 ( $[\text{M} + \text{Na}]^+$ ), Found: 338.1004.

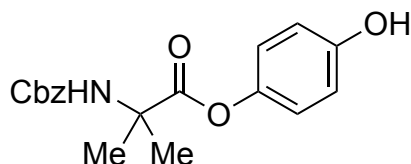

**4-Hydroxyphenyl 2-(((benzyloxy)carbonyl)amino)-2-methylpropanoate (10f)**

White solid. Prepared following general procedure B using *N*-Cbz-Aib-OH.

**$^1\text{H}$  NMR (400 MHz,  $\text{CDCl}_3$ )**  $\delta$  7.37-7.27 (m, 5H), 6.80 (brs, 2H), 6.71 (d,  $J$  = 8.0 Hz, 2H), 5.85 (s, 1H), 5.37 (s, 1H), 5.11 (s, 2H), 5.13 (s, 2H), 1.64 (s, 6H).

**$^{13}\text{C}$  NMR (100 MHz,  $\text{CD}_3\text{OD}$ )**  $\delta$  175.7, 157.6, 156.3, 144.9, 138.3, 129.4, 128.9, 128.7, 123.2, 116.5, 67.3, 57.2, 25.5.

**HRMS** (ESI-TOF) Calcd. for  $\text{C}_{18}\text{H}_{19}\text{NO}_5\text{Na}$ : 352.1155 ( $[\text{M} + \text{Na}]^+$ ), Found: 352.1169.

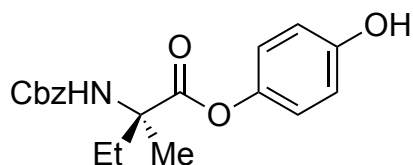

**4-Hydroxyphenyl (*R*)-2-amino-2-methylbutanoate (10g)**

White solid. Prepared following general procedure B using *N*-Cbz-(*R*)- $\alpha$ -Ethylalanine.

**<sup>1</sup>H NMR (400 MHz, CDCl<sub>3</sub>)**  $\delta$  7.33-7.27 (m, 5H), 6.79-6.70 (m, 4H), 6.47 (s, 1H), 5.59 (s, 1H), 5.11 (s, 2H), 2.22-1.93 (m, 2H), 1.67 (s, 3H), 0.95 (t, *J* = 7.6 Hz, 3H).

**<sup>13</sup>C NMR (100 MHz, CDCl<sub>3</sub>)**  $\delta$  173.5, 155.0, 153.9, 143.6, 136.0, 128.5, 128.1, 128.0, 122.0, 116.0, 66.8, 60.3, 30.3, 22.5, 8.2.

**HRMS (ESI-TOF)** Calcd. for C<sub>19</sub>H<sub>21</sub>NO<sub>5</sub>Na: 366.1312 ([M + Na]<sup>+</sup>), Found: 366.1328.

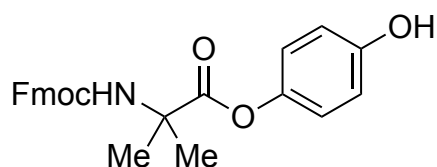

**4-Hydroxyphenyl 2-(((9H-fluoren-9-yl)methoxy)carbonyl)amino)-2-methylpropanoate (10l)**

White solid. Prepared following general procedure B using *N*-Fmoc-Aib-OH.

**<sup>1</sup>H NMR (400 MHz, DMSO-*d*<sub>6</sub>)**  $\delta$  9.36 (s, 1H), 7.84 (d, *J* = 7.6 Hz, 2H), 7.67 (d, *J* = 7.6 Hz, 2H), 7.36 (t, *J* = 7.2 Hz, 2H), 7.26 (d, *J* = 7.2 Hz, 2H), 6.76 (d, *J* = 8.8 Hz, 2H), 6.69 (d, *J* = 8.8 Hz, 2H), 4.31 (d, *J* = 6.4 Hz, 2H), 4.19 (t, *J* = 7.2 Hz, 1H), 1.42 (s, 6H).

**<sup>13</sup>C NMR (100 MHz, DMSO-*d*<sub>6</sub>)**  $\delta$  174.9, 155.7, 155.4, 144.2, 143.4, 141.2, 128.1, 127.5, 125.6, 122.6, 120.6, 116.0, 65.8, 55.9, 47.1, 25.4.

**HRMS (ESI-TOF)** Calcd. for C<sub>25</sub>H<sub>23</sub>NO<sub>5</sub>Na: 440.1468 ([M + Na]<sup>+</sup>), Found: 440.1485.

### 3. Optimization Studies of Acyl Fluoride Generation

#### 3-1. General Procedure for Acyl Fluoride Generation

A reaction tube with magnetic stirring bar was charged with **1a** (0.10 mmol) and I(III) reagent (0.15 mmol, 1.5 equiv.) under argon atmosphere. Solvent (0.50 mL) was added at the corresponding temperature and then fluoride source (0.15 mmol, 1.5 equiv.) was added dropwise at the same temperature. The mixture was stirred at the same temperature for 30 min and filtered through silica pad. After washed with CH<sub>2</sub>Cl<sub>2</sub> three times, the filtrate was concentrated in vacuo. The yield of acyl fluoride **5** was determined by <sup>19</sup>F NMR with 4,4'-difluorobenzophenone as internal standard.

#### 3-2. Optimization of Reaction Conditions

| 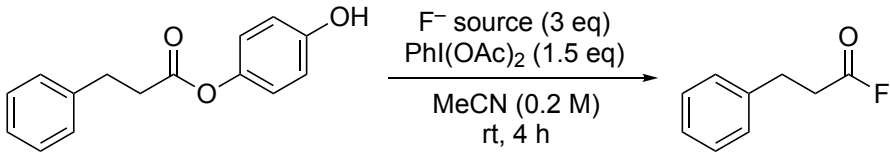 |                         |       |       |                       |       |
|-------------------------------------------------------------------------------------|-------------------------|-------|-------|-----------------------|-------|
| Entry                                                                               | F <sup>-</sup> source   | yield | Entry | F <sup>-</sup> source | yield |
| 1                                                                                   | TBAF (1M THF)           | no TM | 6     | KF                    | no TM |
| 2                                                                                   | TBAF·3H <sub>2</sub> O  | no TM | 7     | CsF                   | no TM |
| 3                                                                                   | TMAF·4H <sub>2</sub> O  | no TM | 8     | Zn <sub>2</sub> F     | no TM |
| 4                                                                                   | TBA·Ph <sub>3</sub> SiF | no TM | 9     | AgF                   | trace |
| 5                                                                                   | NH <sub>4</sub> F       | no TM | 10    | KHF <sub>2</sub>      | 2%    |
|                                                                                     |                         |       | 11    | TEA·3HF               | 33%   |

**Table S1:** Evaluation of Fluoride Source

| 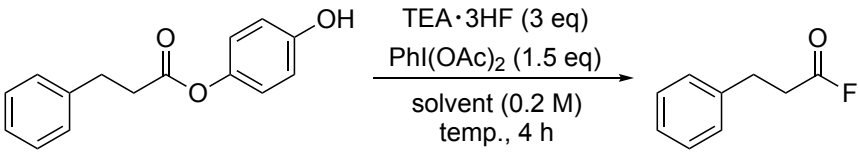 |        |         |       |       |        |                                 |       |
|--------------------------------------------------------------------------------------|--------|---------|-------|-------|--------|---------------------------------|-------|
| Entry                                                                                | temp.  | solvent | yield | Entry | temp.  | solvent                         | yield |
| 1                                                                                    | rt     | MeCN    | 33%   | 6     | -10 °C | MeCN                            | 63%   |
| 2                                                                                    | 40 °C  | MeCN    | 20%   | 7     | 0 °C   | MeCN                            | 67%   |
| 3                                                                                    | -40 °C | MeCN    | 19%   | 8     | -5 °C  | MeCN                            | 68%   |
| 4                                                                                    | -30 °C | MeCN    | 41%   | 9     | -5 °C  | DMF                             | no TM |
| 5                                                                                    | -20 °C | MeCN    | 56%   | 10    | -5 °C  | THF                             | 16%   |
|                                                                                      |        |         |       | 11    | -5 °C  | CH <sub>2</sub> Cl <sub>2</sub> | 43%   |

**Table S2:** Evaluation of Solvent & Temperature

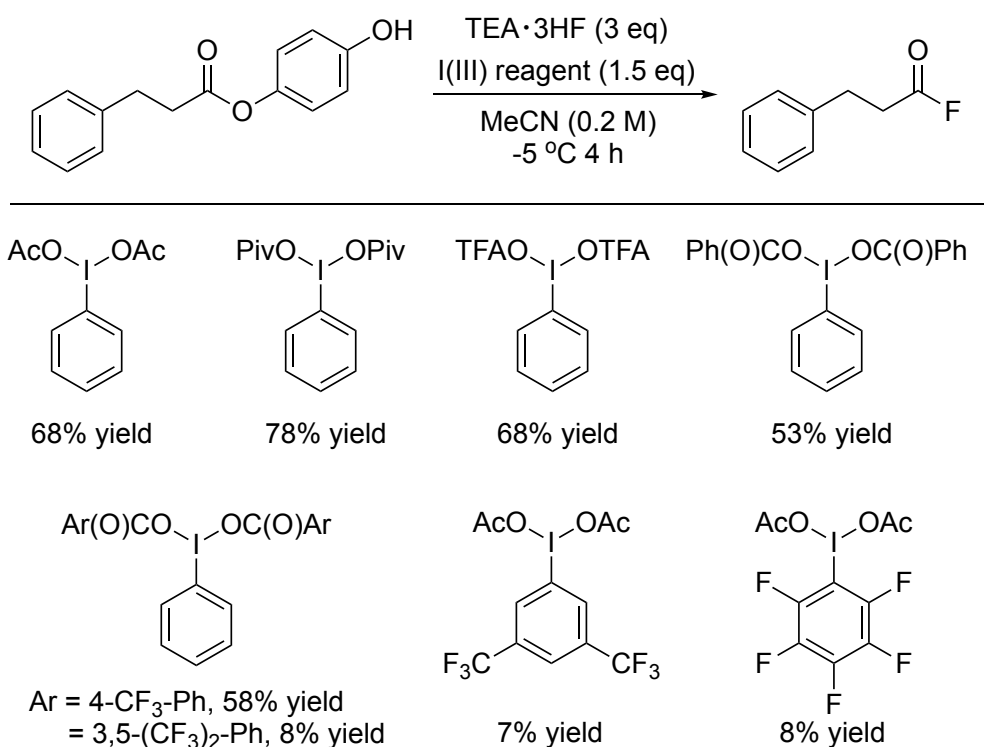

**Table S3:** Evaluation of Hypervalent I(III) reagent

| <p>Reaction scheme showing the conversion of 4-(benzyloxy)benzoic acid to 4-fluorobenzaldehyde using F source (X eq), I(III) reagent (1.5 eq), MeCN (0.2 M), T, t.</p> |                 |                        |        |        |       |
|------------------------------------------------------------------------------------------------------------------------------------------------------------------------|-----------------|------------------------|--------|--------|-------|
| Entry                                                                                                                                                                  | F source        | I(III) reagent         | t (h)  | t (°C) | yield |
| 1                                                                                                                                                                      | TEA·3HF (3 eq)  | PhI(OAc) <sub>2</sub>  | 4      | -5     | 68%   |
| 1                                                                                                                                                                      | Py·9HF (3 eq)   | PhI(OAc) <sub>2</sub>  | 4      | -5     | 92%   |
| 2                                                                                                                                                                      | Py·9HF (3 eq)   | PhI(OPiv) <sub>2</sub> | 4      | -5     | 99%   |
| 3                                                                                                                                                                      | Py·9HF (3 eq)   | PhI(OPiv) <sub>2</sub> | 1      | -5     | 99%   |
| 4                                                                                                                                                                      | Py·9HF (1.5 eq) | PhI(OPiv) <sub>2</sub> | 1      | -5     | 99%   |
| 5                                                                                                                                                                      | Py·9HF (1.5 eq) | -                      | 1      | 0      | no TM |
| 6                                                                                                                                                                      | Py·9HF (1.5 eq) | -                      | 1      | rt     | no TM |
| 7                                                                                                                                                                      | Py·9HF (1.5 eq) | PhI(OPiv) <sub>2</sub> | 1      | 0      | 99%   |
| 8                                                                                                                                                                      | Py·9HF (1.5 eq) | PhI(OPiv) <sub>2</sub> | 10 min | 0      | 99%   |

**Table S4:** Further Evaluation

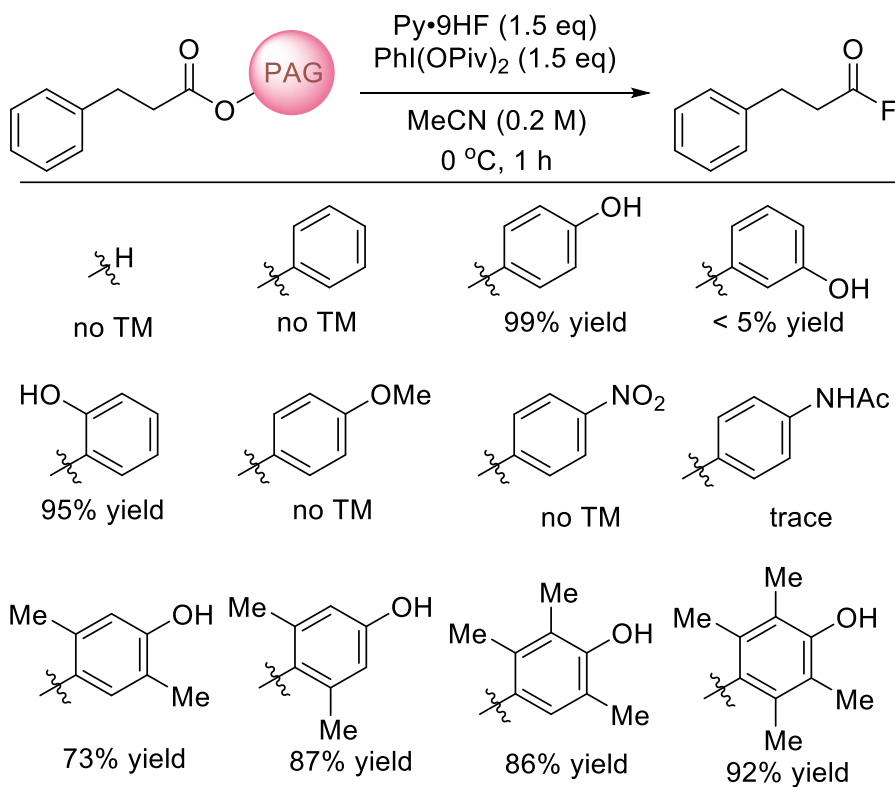

**Table S5:** Evaluation of PAG

#### 4. Direct Amidation vs Amidation via Acyl Fluoride Intermediate

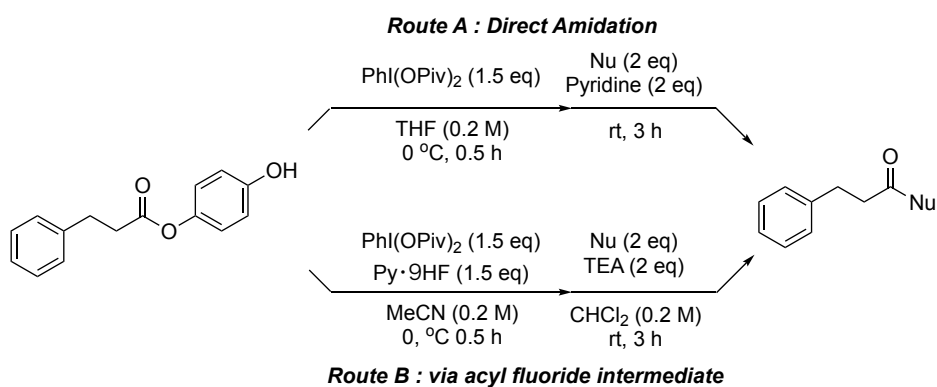

| Route |           |           |           |           |
|-------|-----------|-----------|-----------|-----------|
| A     | 88% yield | 83% yield | no TM     | no TM     |
| B     | 95% yield | 95% yield | 87% yield | 88% yield |

**Table S5:** Transformation of amides with/without a  $\text{Py}\cdot 9\text{HF}$

## 5. Generation of Acyl Fluoride Intermediate

### 5-1. General Procedures

**General Procedure C:** A reaction tube with magnetic stirring bar was charged with substrate (0.10 mmol) and  $\text{PhI}(\text{OPiv})_2$  (0.15 mmol, 1.5 equiv.) under argon atmosphere. MeCN (0.50 mL) was added at 0 °C and then  $\text{Py}\cdot 9\text{HF}$  (0.15 mmol, 1.5 equiv.) was added dropwise at the same temperature. The mixture was stirred at 0 °C for 30 min and filtered through silica pad. After washed with  $\text{CH}_2\text{Cl}_2$  three times, the filtrate was concentrated in vacuo. The yield of acyl fluoride was determined by  $^{19}\text{F}$  NMR with 4,4'-difluorobenzophenone as internal standard.

**General Procedure D:** A reaction tube with magnetic stirring bar was charged with substrate (0.10 mmol) and  $\text{PhI}(\text{OPiv})_2$  (0.15 mmol, 1.5 equiv.) under argon atmosphere. MeCN (2.0 mL) was added at -10 °C and then  $\text{Py}\cdot 9\text{HF}$  (0.15 mmol, 1.5 equiv.) was added dropwise at the same temperature. The mixture was stirred at -10 °C for 30 min and filtered through silica pad. After washed with  $\text{CH}_2\text{Cl}_2$  three times, the filtrate was concentrated in vacuo. The yield of acyl fluoride was determined by  $^{19}\text{F}$  NMR with 4,4'-difluorobenzophenone as internal standard.

### 5.2 Determination of NMR Yield

5 (Prepared by the general procedure C)

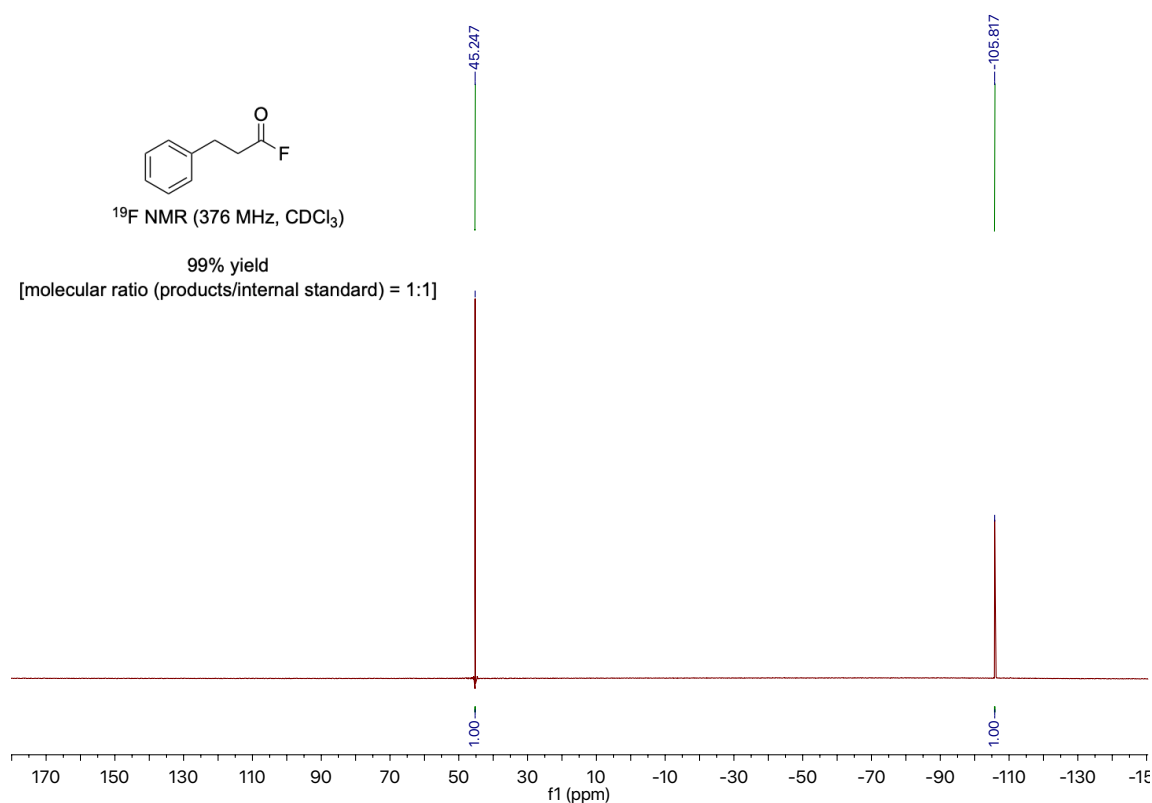

**7m** (Prepared by the general procedure C)

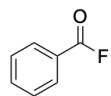

$^{19}\text{F}$  NMR (376 MHz,  $\text{CDCl}_3$ )

84% yield

(molecular ratio (products/internal standard) = 1:2)

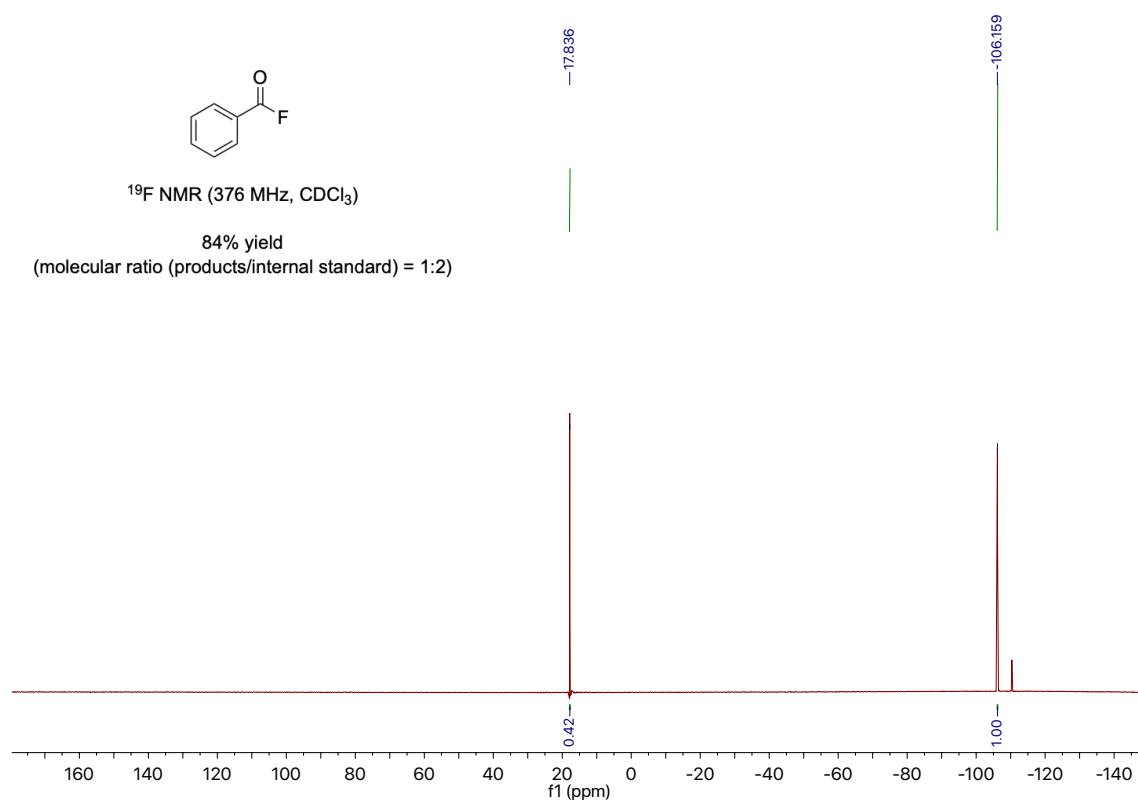

**7n** (Prepared by the general procedure C)

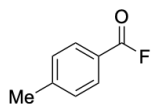

$^{19}\text{F}$  NMR (376 MHz,  $\text{CDCl}_3$ )

90% yield

(molecular ratio (products/internal standard) = 1:1)

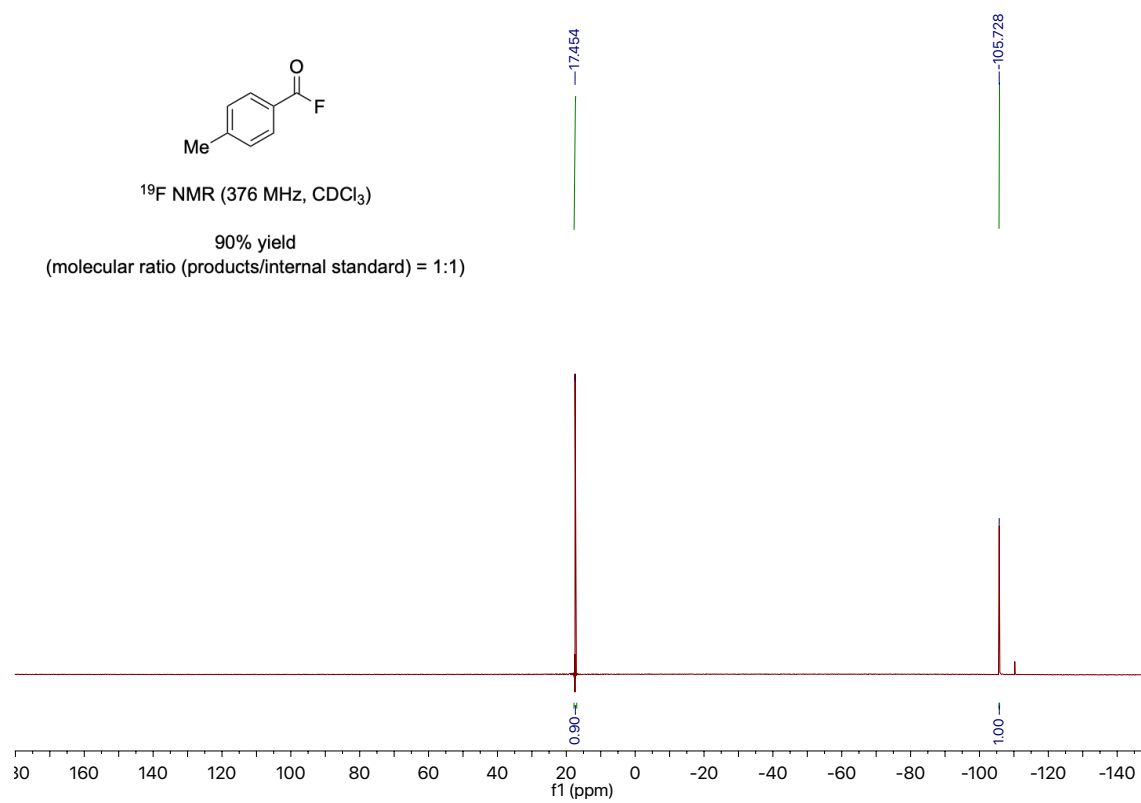

**7o** (Prepared by the general procedure C)

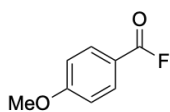

$^{19}\text{F}$  NMR (376 MHz,  $\text{CDCl}_3$ )

92% yield  
(molecular ratio (products/internal standard) = 1:1)

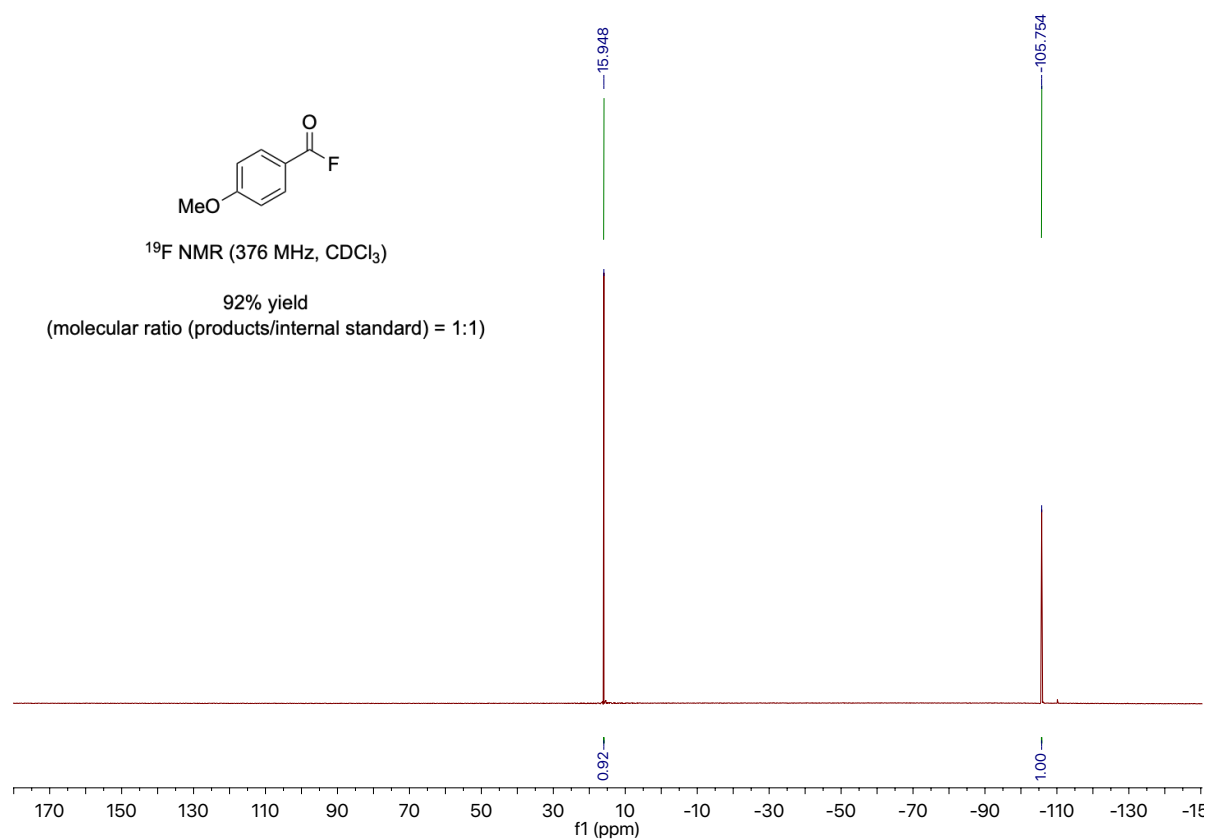

**7p** (Prepared by the general procedure C)

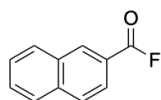

$^{19}\text{F}$  NMR (376 MHz,  $\text{CDCl}_3$ )

99% yield  
[molecular ratio (products/internal standard) = 1:1]

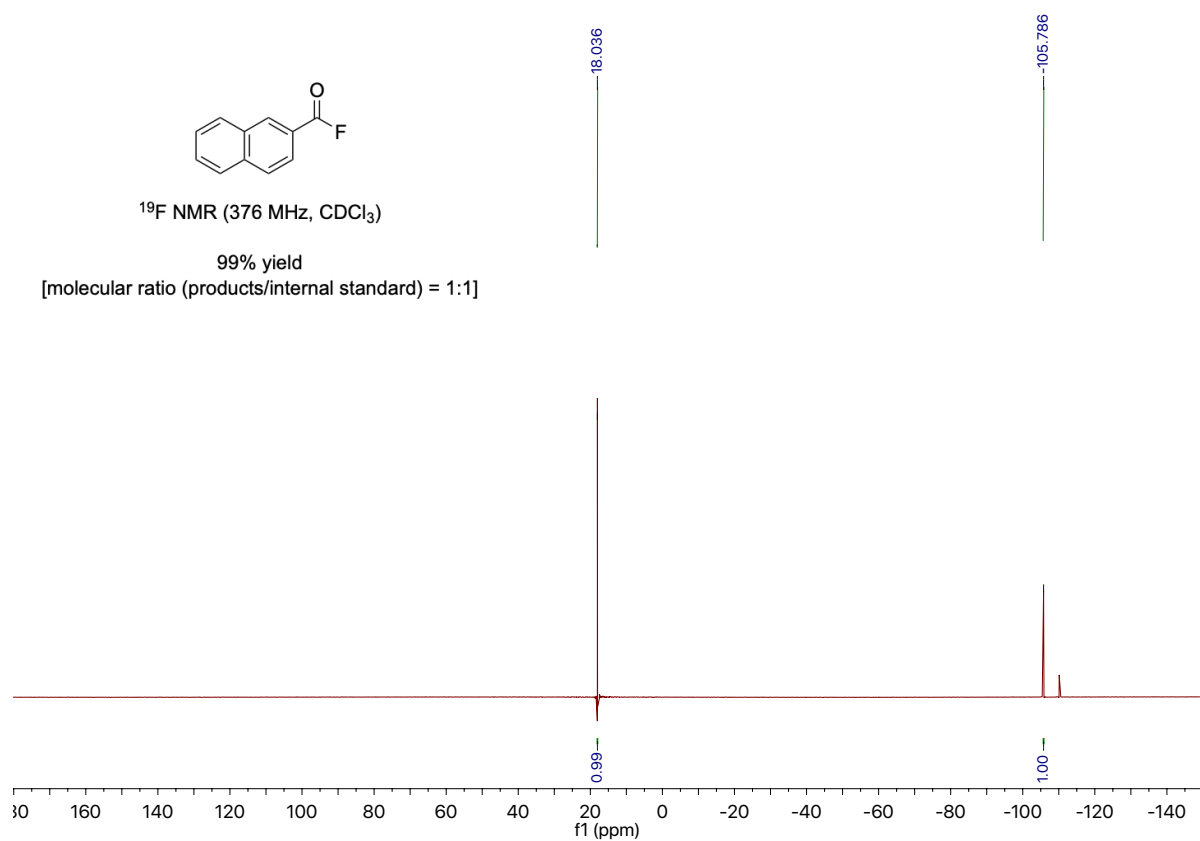

**7q** (Prepared by the general procedure C)

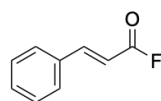

$^{19}\text{F}$  NMR (376 MHz,  $\text{CDCl}_3$ )

99% yield

(molecular ratio (products/internal standard) = 1:1)

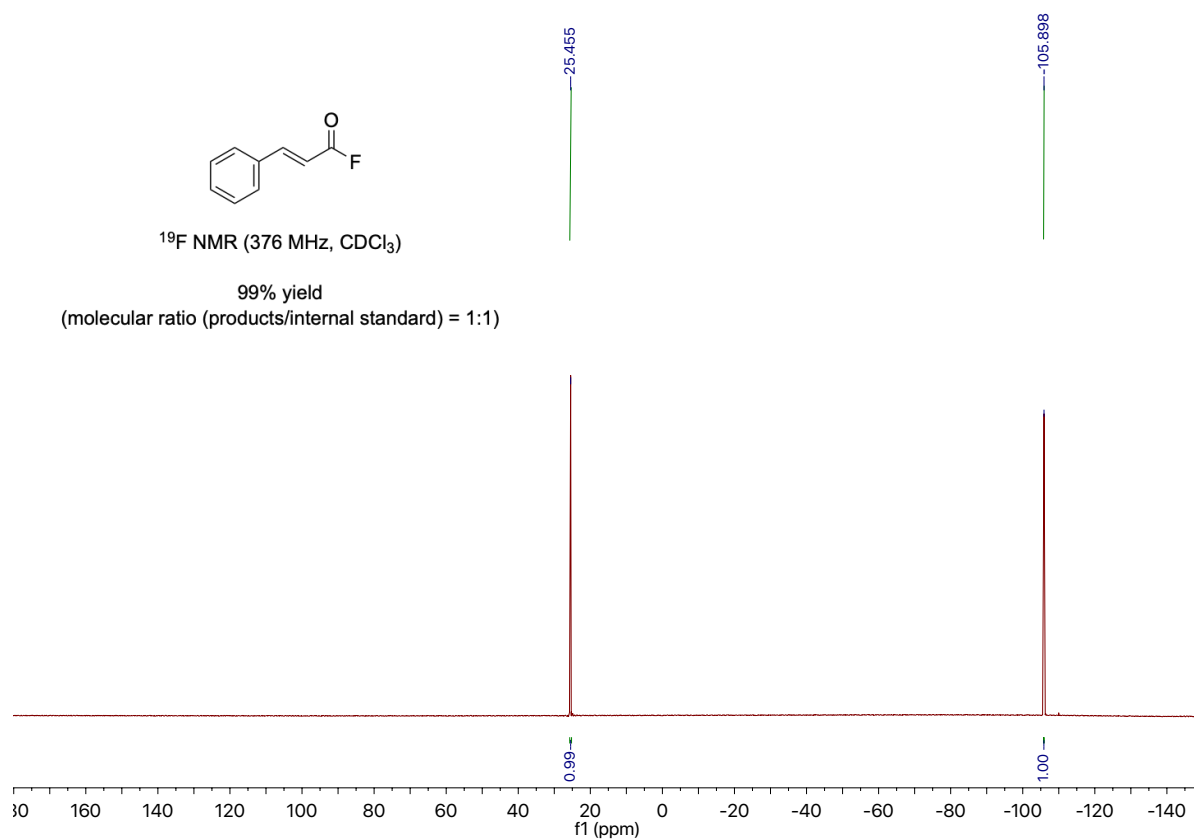

**7r** (Prepared by the general procedure C)

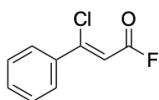

$^{19}\text{F}$  NMR (376 MHz,  $\text{CDCl}_3$ )

99% yield

[molecular ratio (products/internal standard) = 1:1]

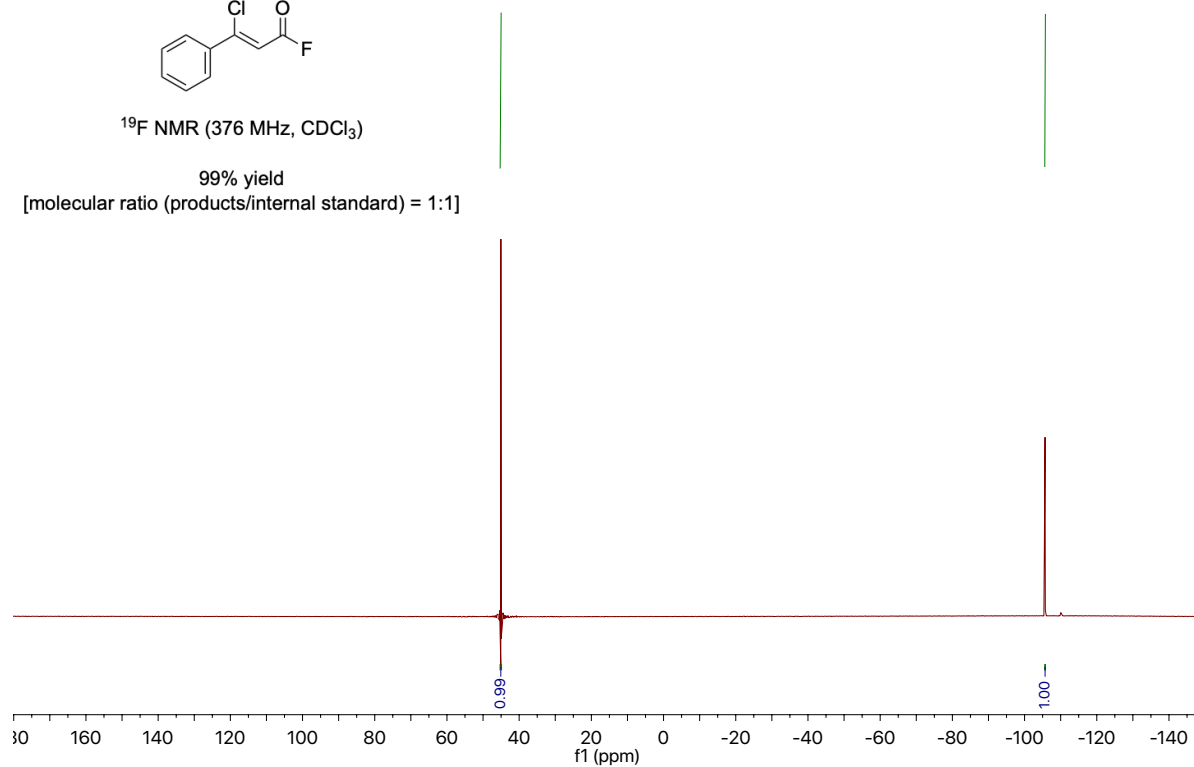

**7s** (Prepared by the general procedure C)

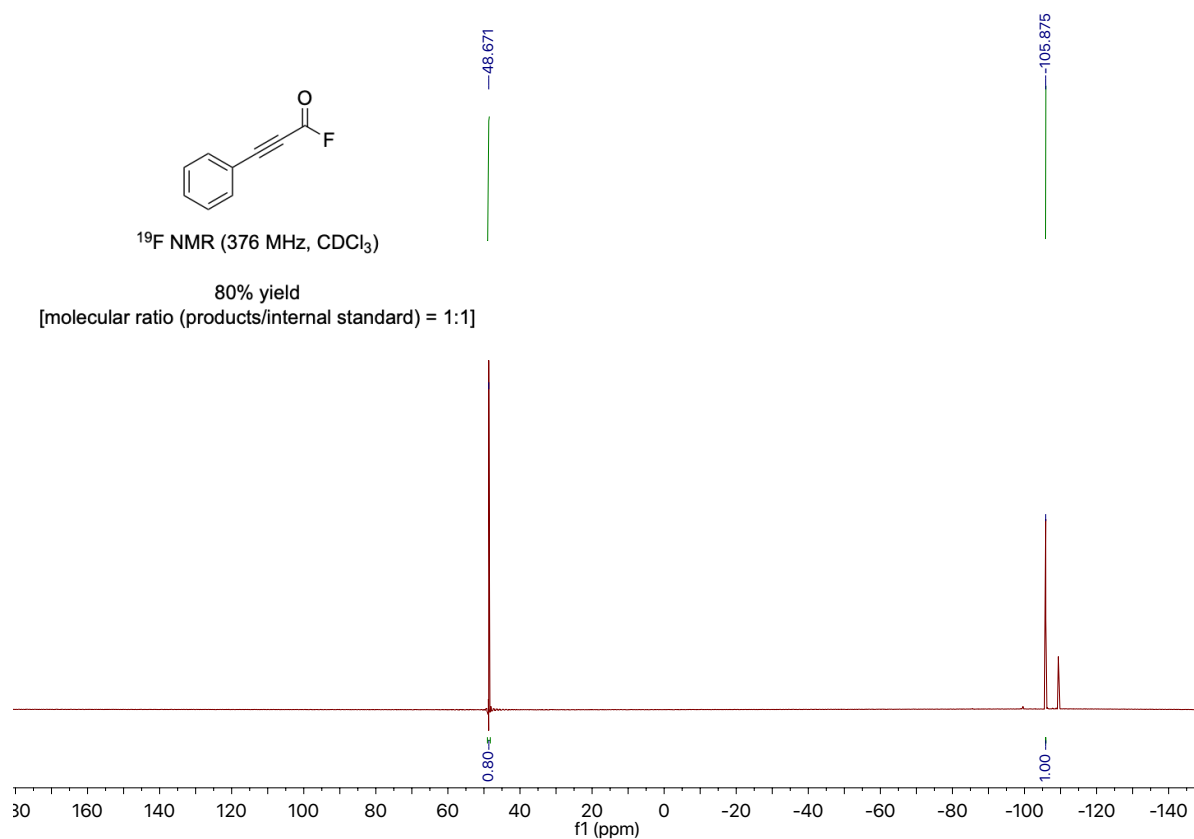

**7t** (Prepared by the general procedure C)

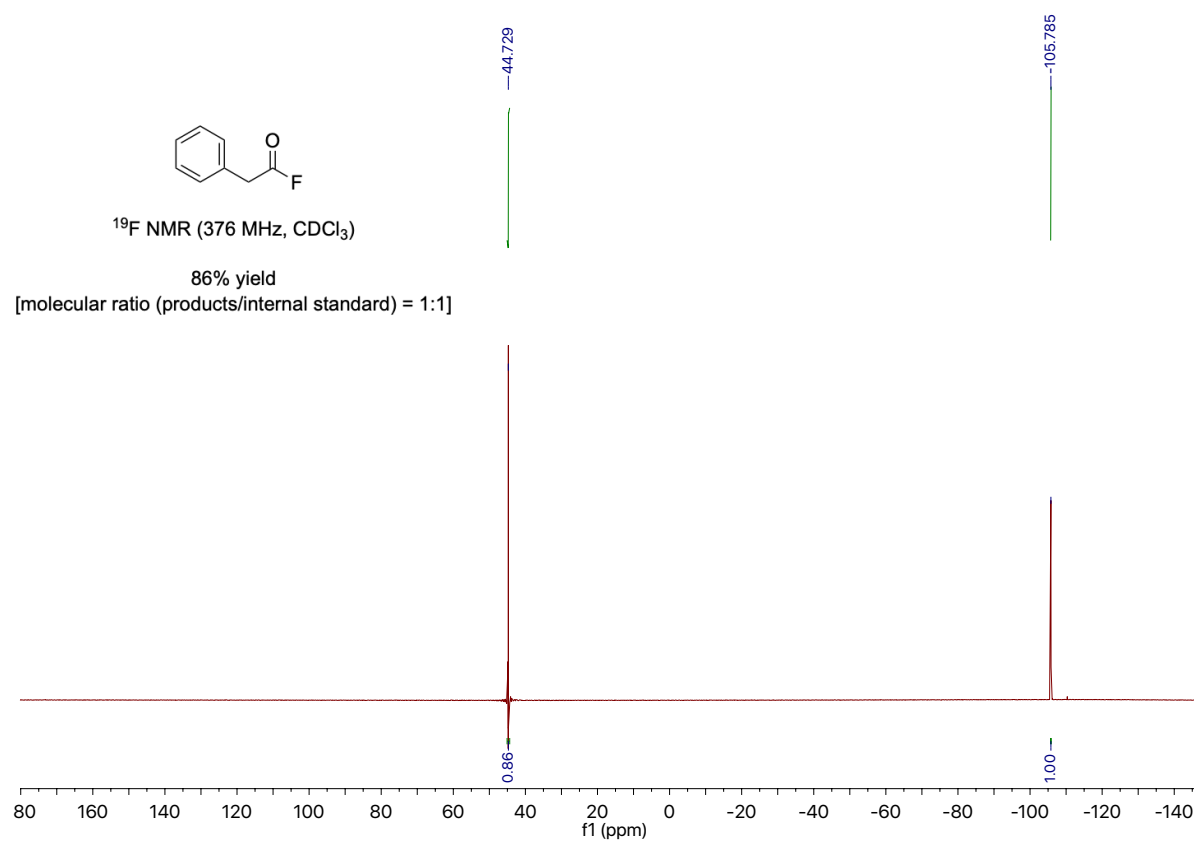

**7u** (Prepared by the general procedure C)

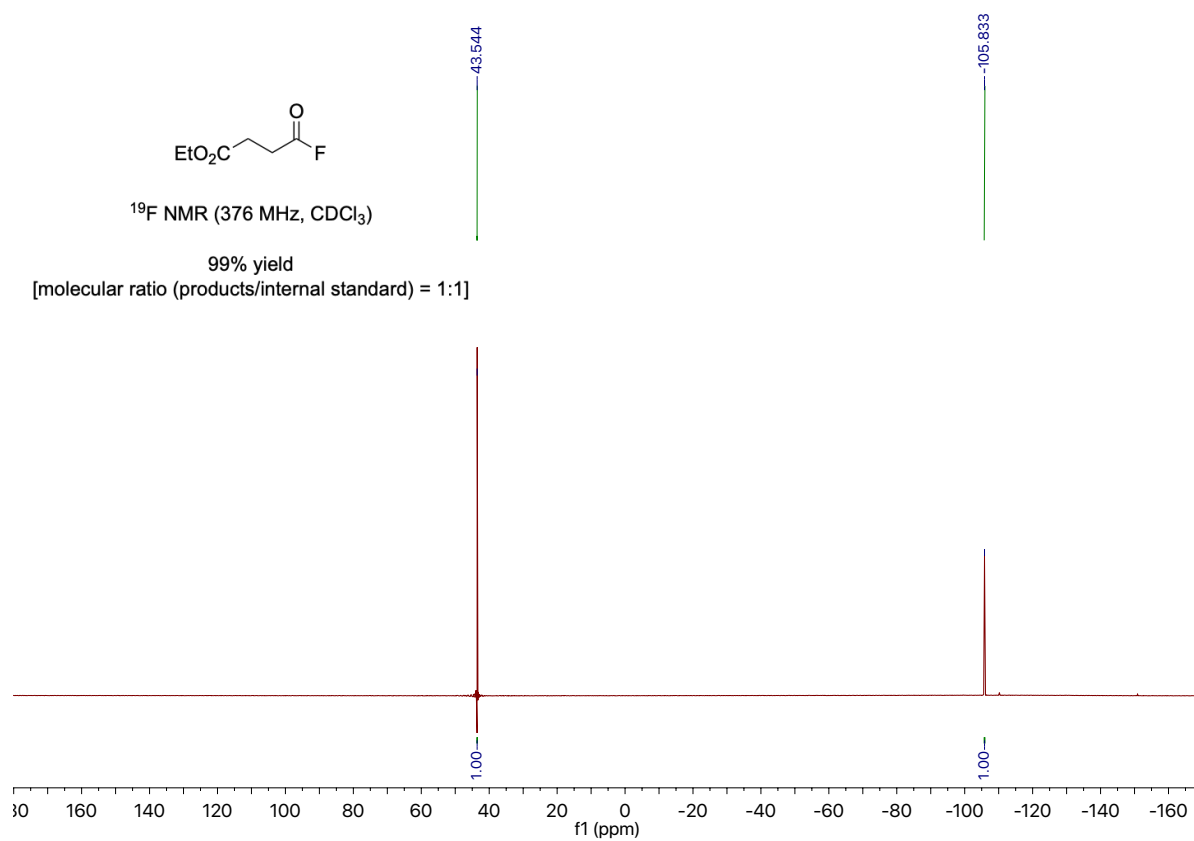

**7v** (Prepared by the general procedure C)

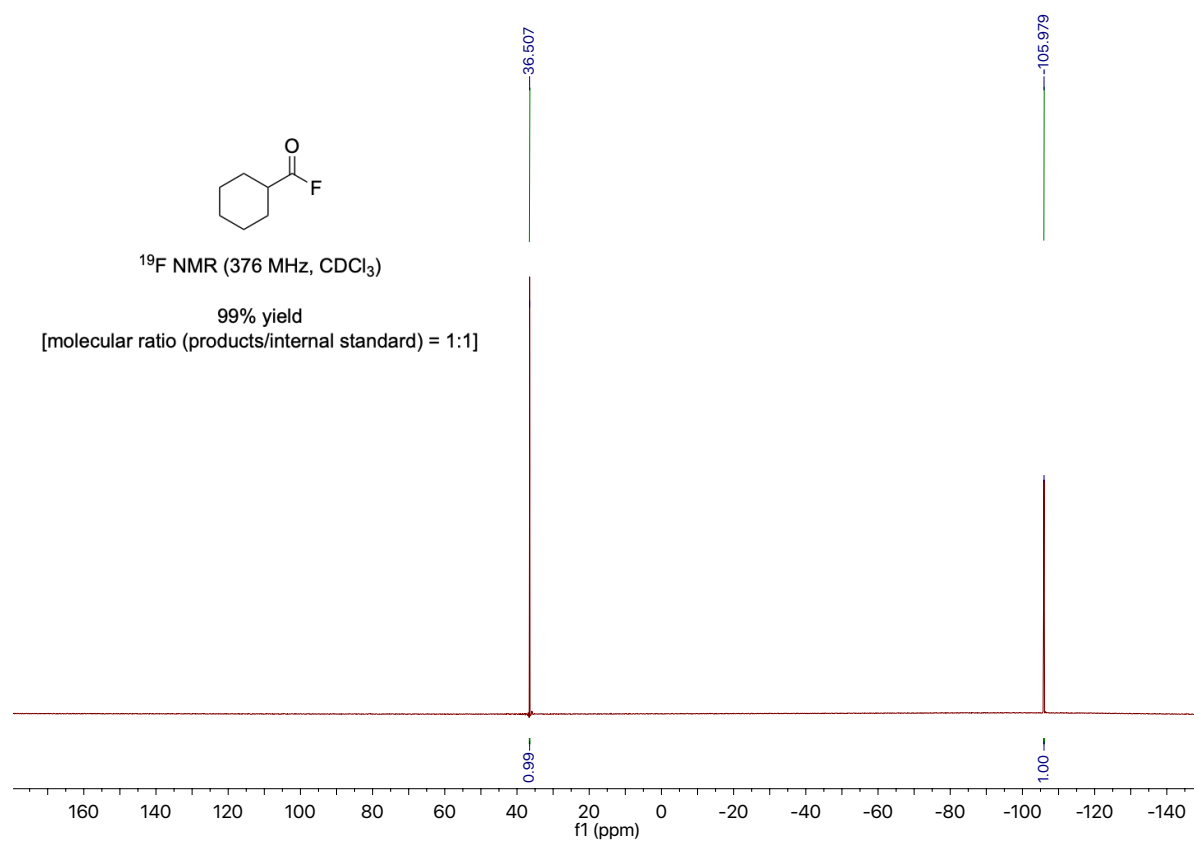

7w (Prepared by the general procedure C)

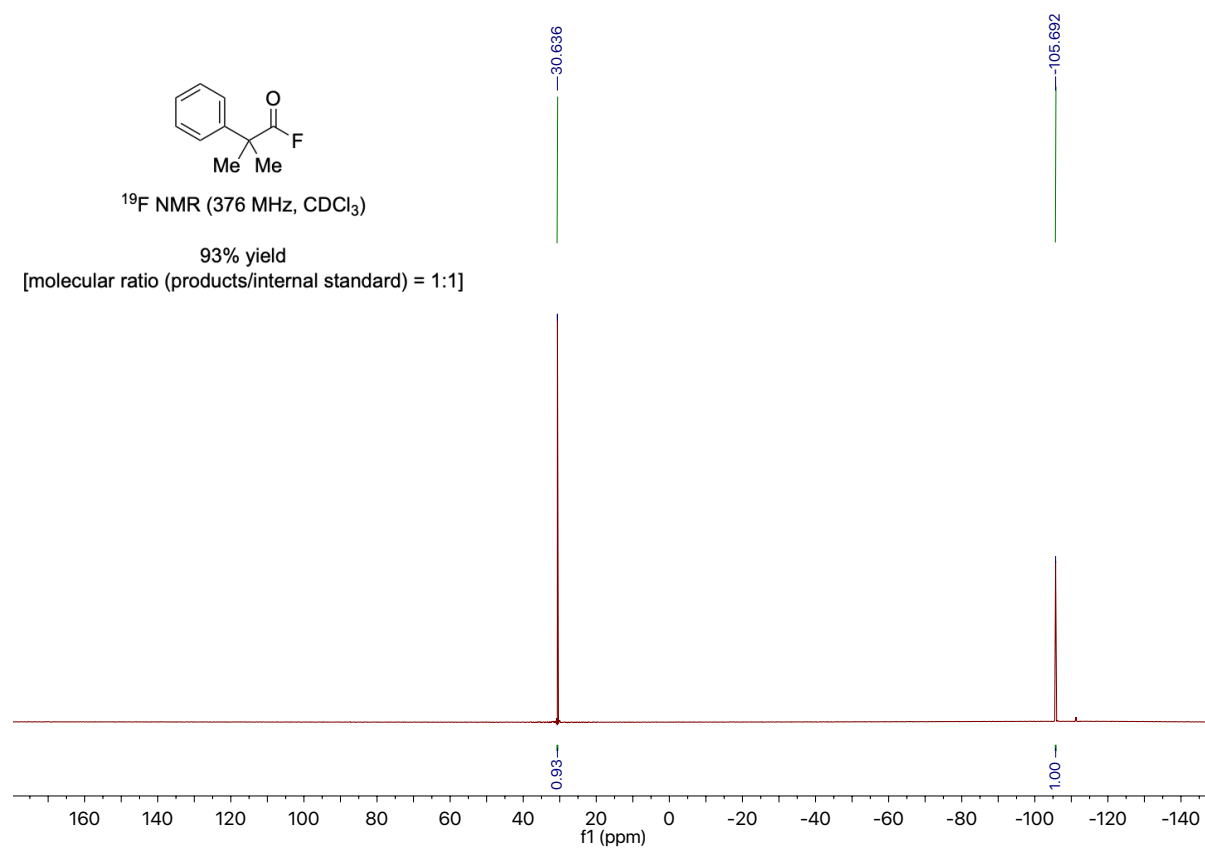

7y (Prepared by the general procedure C)

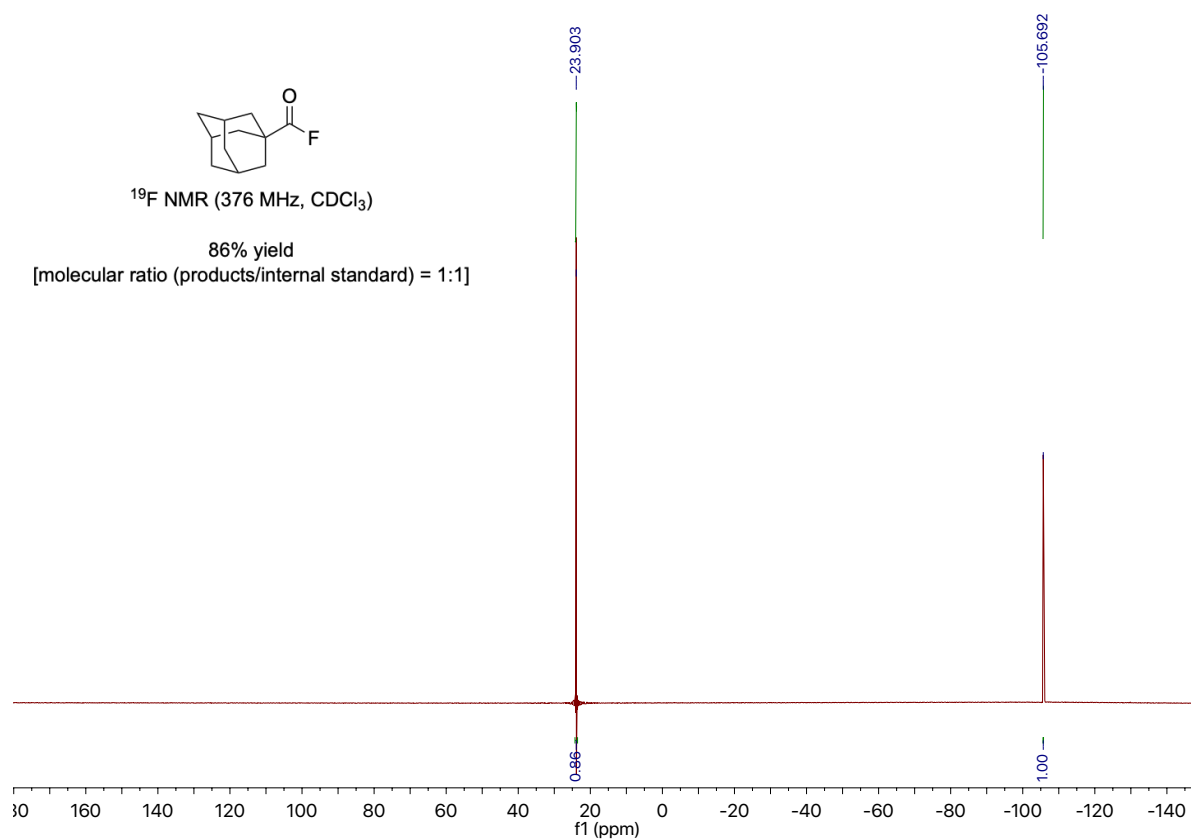

**11a** (Prepared by the general procedure D)

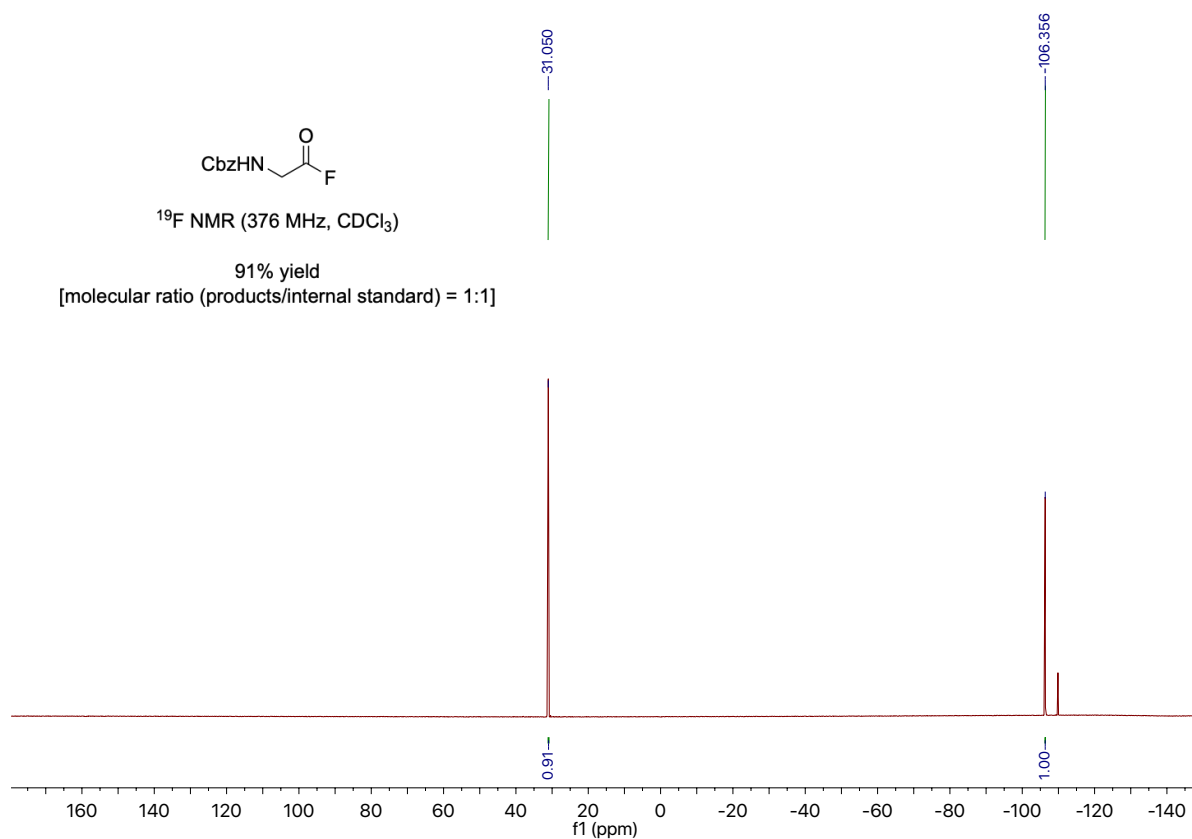

**11b** (Prepared by the general procedure D)

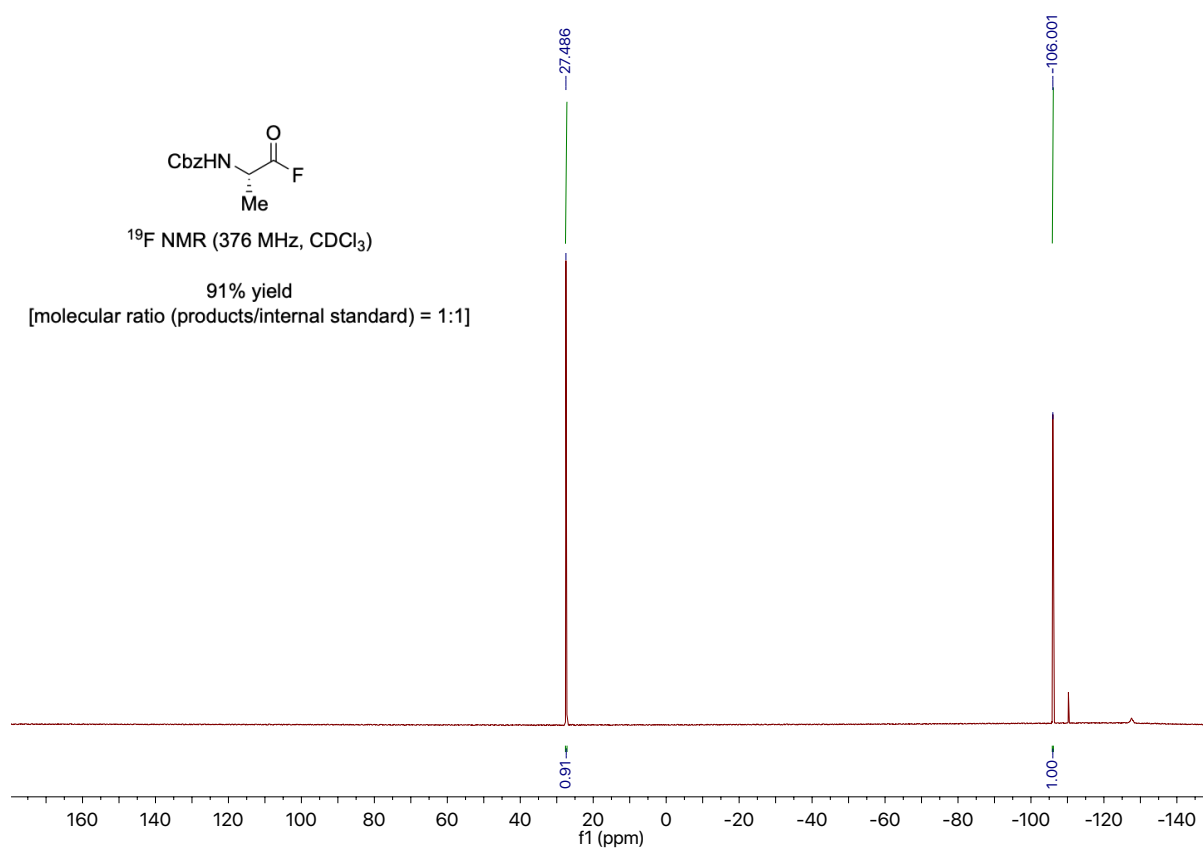

**11c** (Prepared by the general procedure D)

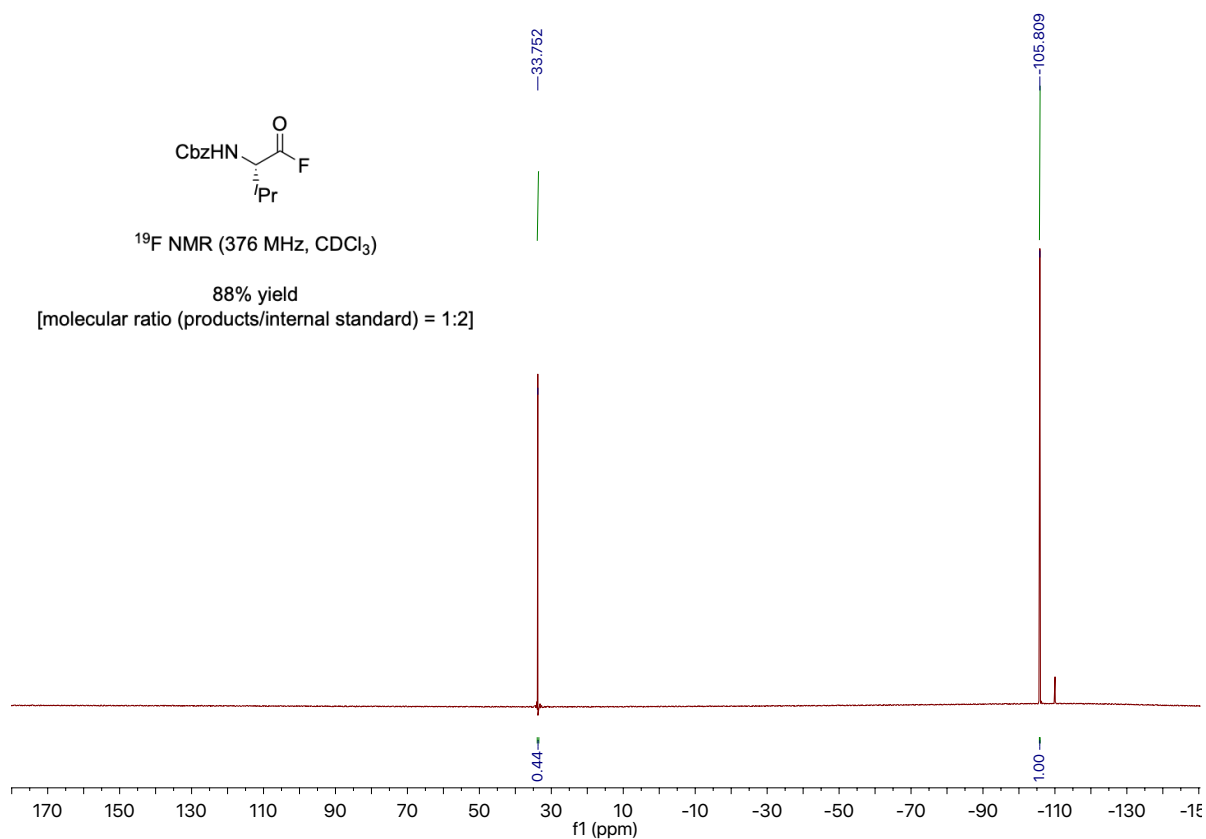

**11e** (Prepared by the general procedure D)

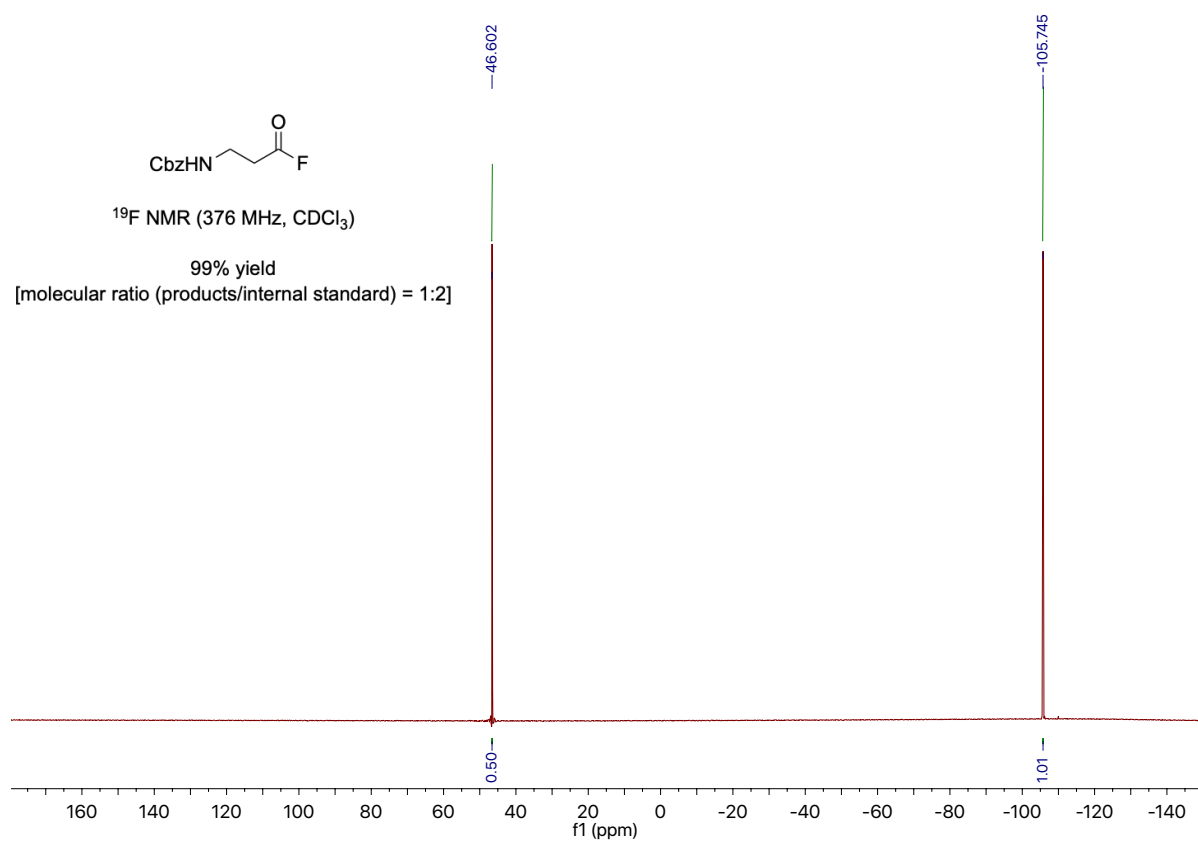

**11f** (Prepared by the general procedure D)

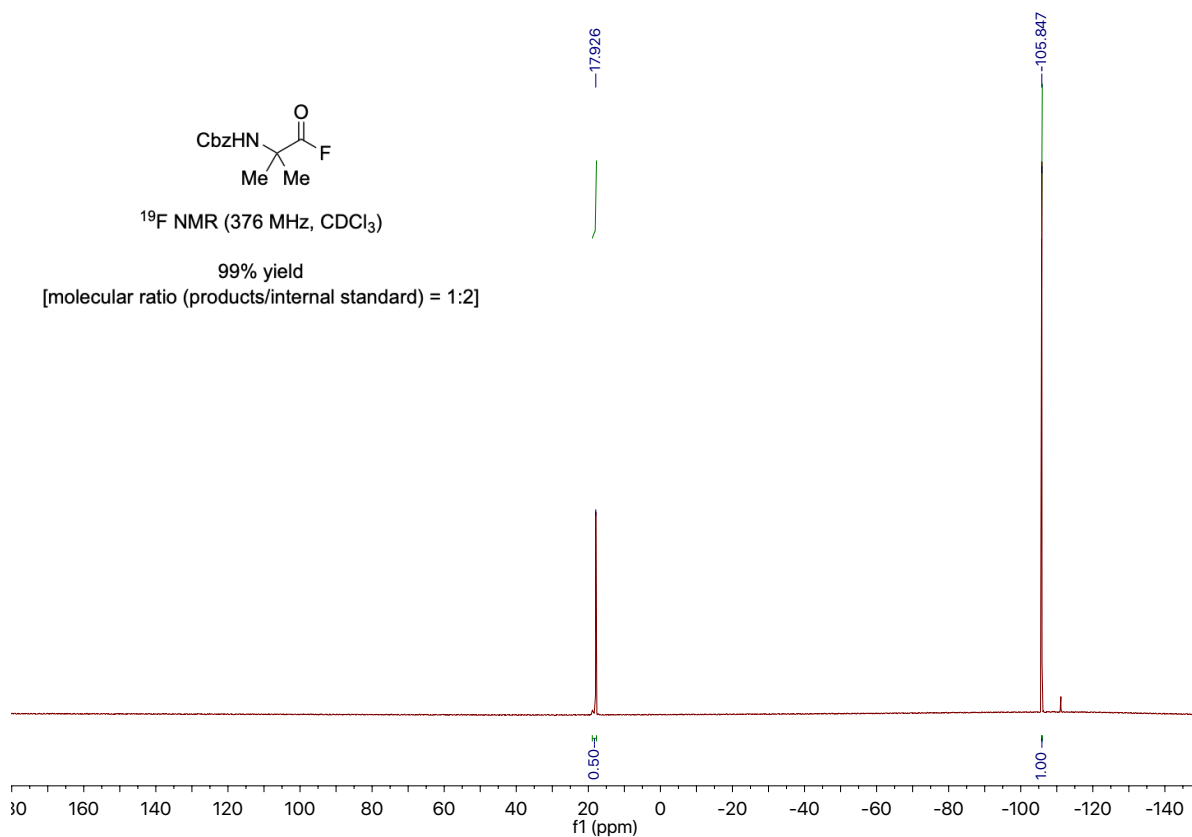

**11g** (Prepared by the general procedure D)

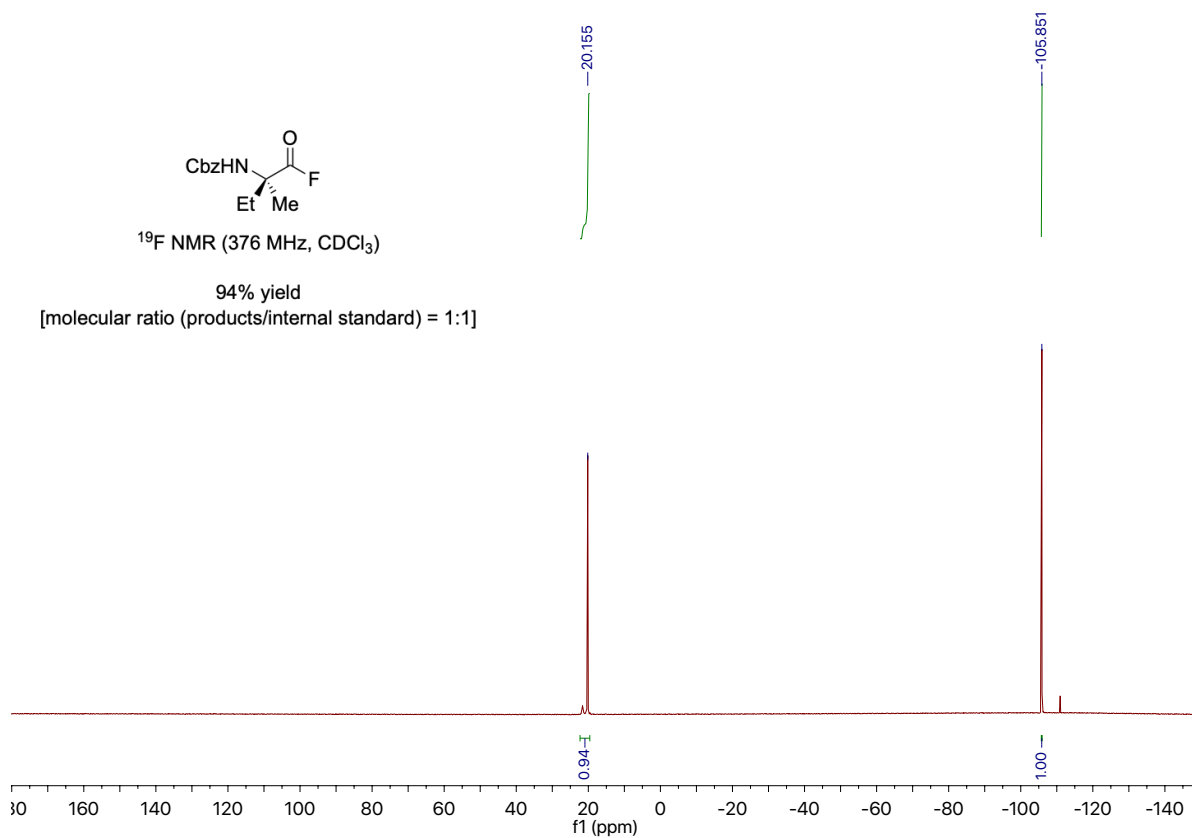

11l (Prepared by the general procedure D)

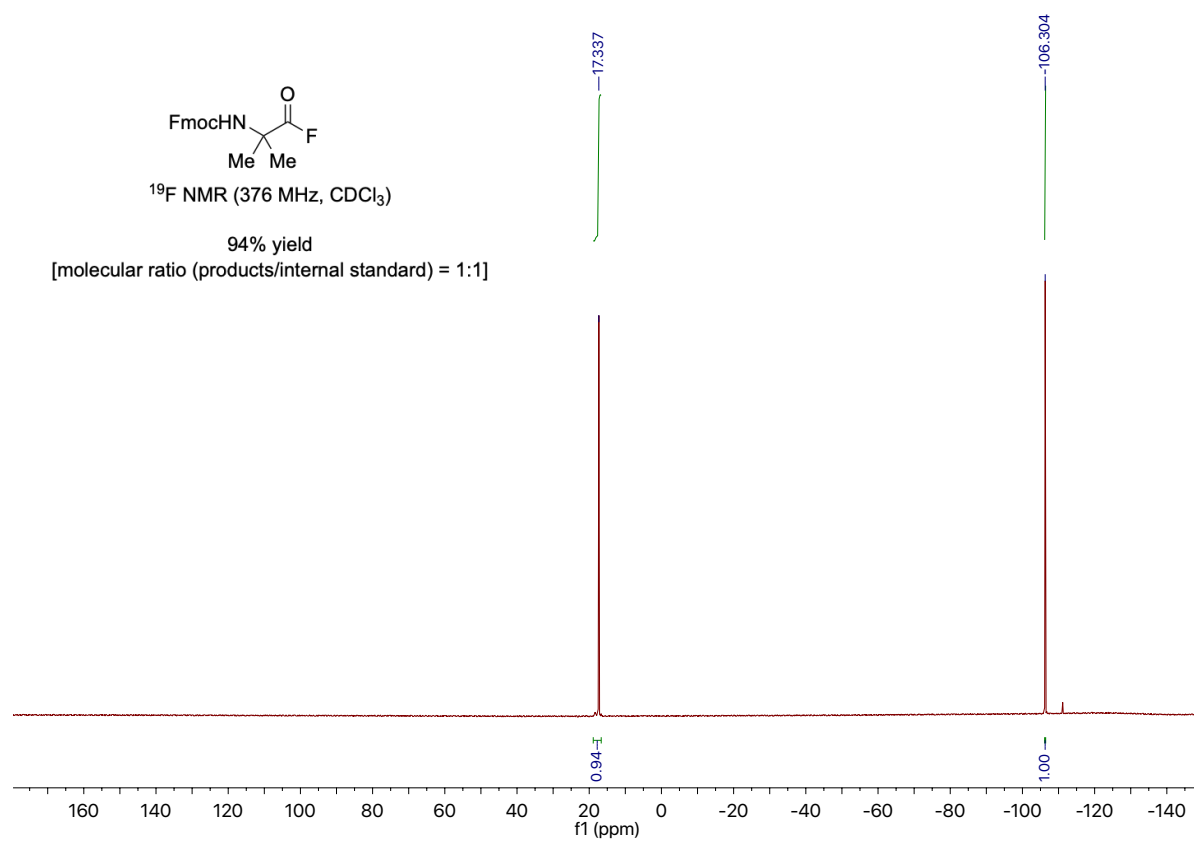

### 5-3. Purification of Acyl Fluoride **5**

A reaction tube with magnetic stirring bar was charged with 4-hydroxyphenyl cinnamate (**1**) (0.30 mmol) and  $\text{PhI}(\text{OPiv})_2$  (0.45 mmol, 1.5 equiv.) under argon atmosphere. MeCN (1.50 mL) was added at 0 °C and then  $\text{Py}\cdot 9\text{HF}$  (0.45 mmol, 1.5 equiv.) was added dropwise at the same temperature. The mixture was stirred at 0 °C for 30 min and filtered through silica pad. After washed with  $\text{CH}_2\text{Cl}_2$  three times, the filtrate was concentrated in vacuo. Purification by flash column chromatography on silica gel (eluent : only hexane to hexane/ $\text{CH}_2\text{Cl}_2$  (9/1)) provided **5** in 88% yield (40 mg, 0.26 mmol).

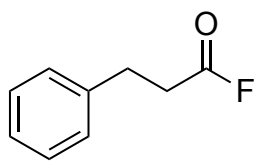

### 3-Phenylpropanoyl fluoride (**5**)

Colorless oil

**$^1\text{H}$  NMR (400 MHz,  $\text{CDCl}_3$ )**  $\delta$  7.33-7.25 (m, 2H), 7.25-7.20 (m, 3H), 2.99 (t,  $J = 7.5$  Hz, 2H), 2.83 (t,  $J = 7.5$  Hz, 2H).

**$^{13}\text{C}$  NMR (125 MHz,  $\text{CDCl}_3$ )**  $\delta$  162.9 (d,  $J_{\text{C-F}} = 358.5$  Hz), 138.9, 128.8, 128.3, 126.9, 33.9 (d,  $J_{\text{C-F}} = 50.1$  Hz), 30.0, (d,  $J_{\text{C-F}} = 2.3$  Hz).

**$^{19}\text{F}$  NMR (470 MHz,  $\text{CDCl}_3$ )**  $\delta$  45.43.

**HRMS** (ESI-TOF) Calcd. for  $\text{C}_9\text{H}_9\text{OFNa}$ : 175.0530 ( $[\text{M} + \text{Na}]^+$ ), Found: 175.0526.

## 6. Computational Mechanism Study

### 6-1. Computational Details

All calculations were performed using the Gaussian 16<sup>S1</sup> program package employing the M06-2X<sup>S2</sup> functional. The reported geometries were fully optimized using the 6-31G\* basis sets for C, H, O, and F atoms and Lanl2DZdp basis set<sup>S3</sup> for I atom. The vibrational frequency analysis was made for all the optimized geometries to determine whether it is a stationary structure with no imaginary frequency or a transition state with only one imaginary frequency. Intrinsic reaction coordinate (IRC)<sup>S4</sup> calculations were carried out to make sure if the transition state connects the correct reactant and product. Solvent effects of acetonitrile were evaluated by SMD<sup>S5</sup> model. To evaluate better potential energy, single point calculations were carried out using the 6-311+G\*\* basis sets for C, H, O, and F atoms and def2-QZVP basis set<sup>S6</sup> for I atom, where the optimized geometries in gas phase were employed. CYLView<sup>S7</sup> visualization program was used to describe the 3-dimensional structure.

The zero-point energy ( $E_{gas}^{v_0}$ ) was calculated in gas phase because it is likely that the vibration is not influenced very much by solvation. Thus, the total energy  $E_{sol}$  for each species is defined using the eqn (S1):

$$E_{sol} = E_{sol}^{pot} + E_{gas}^{v_0} \quad (S1)$$

where  $E_{sol}^{pot}$  is a potential energy involving a non-electrostatic term in solution. As for the bimolecular process, the entropy change must be considered because it decreases significantly during the process. In this context, the Gibbs energy ( $G_{sol}^0$ ) in solution is evaluated by eqn (S2):

$$\begin{aligned} G_{sol}^0 &= H_0 - T(S_r^0 + S_v^0 + S_t^0) \\ &= E^T + P\Delta V - T(S_r^0 + S_v^0 + S_t^0) \\ &= E_{sol} + E_{therm} - T(S_r^0 + S_v^0 + S_t^0) \end{aligned} \quad (S2)$$

where in solution  $\Delta V$  is 0,  $E_{therm}$  represents the thermal correction by translational, vibrational, and rotational movements, and  $S_r^0$ ,  $S_v^0$ , and  $S_t^0$  represent rotational, vibrational, and translational entropies, respectively. Generally, the Thacker-Tetrode equation is applied to evaluate translational entropy  $S_t^0$ . However, owing to the great suppress of translation movement in solution, the usual Thacker-Tetrode equation cannot be directly employed to evaluate  $S_t^0$  in solution.<sup>S8</sup> Hence, the translational entropy should be corrected using the method developed by Whitesides et al.,<sup>S9</sup> while the rotational entropy was estimated in a normal way because the rotation movement would occur in solvation cage. Thermal correction

and entropy contributions of vibration movements to the Gibbs energy were estimated employing the frequency calculations at 298.15 K and 1 atm.

## 6-2. Discussion of Ligand Exchange Reaction of Hypervalent Iodine Reagent PhI(OPiv)<sub>2</sub>

Hypervalent iodine reagent PhI(OPiv)<sub>2</sub> approaches **1** to induce the ligand exchange of the iodine atom. In this ligand exchange, we investigated two reaction pathways leading to the formation of aromatic intermediate with I-O bond and that of non-aromatic intermediate with I-C<sup>ortho</sup> bond because the recent report proposed that the iodine is bound with the ortho carbon atom to afford non-aromatic intermediate;<sup>S10</sup> for brevity, the former is named aromatic pathway and the latter is de-aromatic pathway here. In the de-aromatic pathway, the Gibbs free energy of activation ( $\Delta G^{\ddagger}$ ) is very large (25.1 kcal/mol), as shown by red line in Figure S1. Also, it is highly endothermic (the Gibbs free energy of reaction  $\Delta G^{\circ} = 22.4$  kcal/mol); geometry changes are shown in Figures S2 and S3. In contrast, the  $\Delta G^{\ddagger}$  value in the aromatic pathway is 16.9 kcal/mol and the  $\Delta G^{\circ}$  is 2.8 kcal/mol, as shown by sky blue line in Figure S1. These results indicate that the de-aromatic pathway is much more difficult than the aromatic one. We investigated how much HF molecules influence the energy change using HF to (HF)<sub>7</sub>, as shown in Figure S1; geometry changes are presented in Figures S4 and S5. The hypervalent iodine reagent interacts with the OH group of the substrate to afford the first intermediate **IM1-N** (N = 1-16). The HF clusters interact with the ester moiety and/or the pivalate moiety. Because both the pivalate and ester moieties are polarized, it is likely that both interact with HF cluster. Such interaction structure is found in **TS1-14**, **TS1-15**, and **TS1-16**, where (HF)<sub>5</sub>, (HF)<sub>6</sub>, and (HF)<sub>7</sub> clusters interact with the pivalate and ester moieties. The  $\Delta G^{\ddagger}$  value is 22.0, 21.2 and 21.5 kcal/mol for them (Figure S1), respectively, indicating that the  $\Delta G^{\ddagger}$  value depends little on the presence of HF cluster.

If acyl fluoride, PhCH<sub>2</sub>CH<sub>2</sub>COF (**5**), is formed more easily from aromatic intermediate with a smaller  $\Delta G^{\ddagger}$  value than 25.1 kcal/mol, the reaction does not necessarily occur through the de-aromatic intermediate. Thus, the next work is to investigate the reaction of HF molecule with the aromatic intermediate.

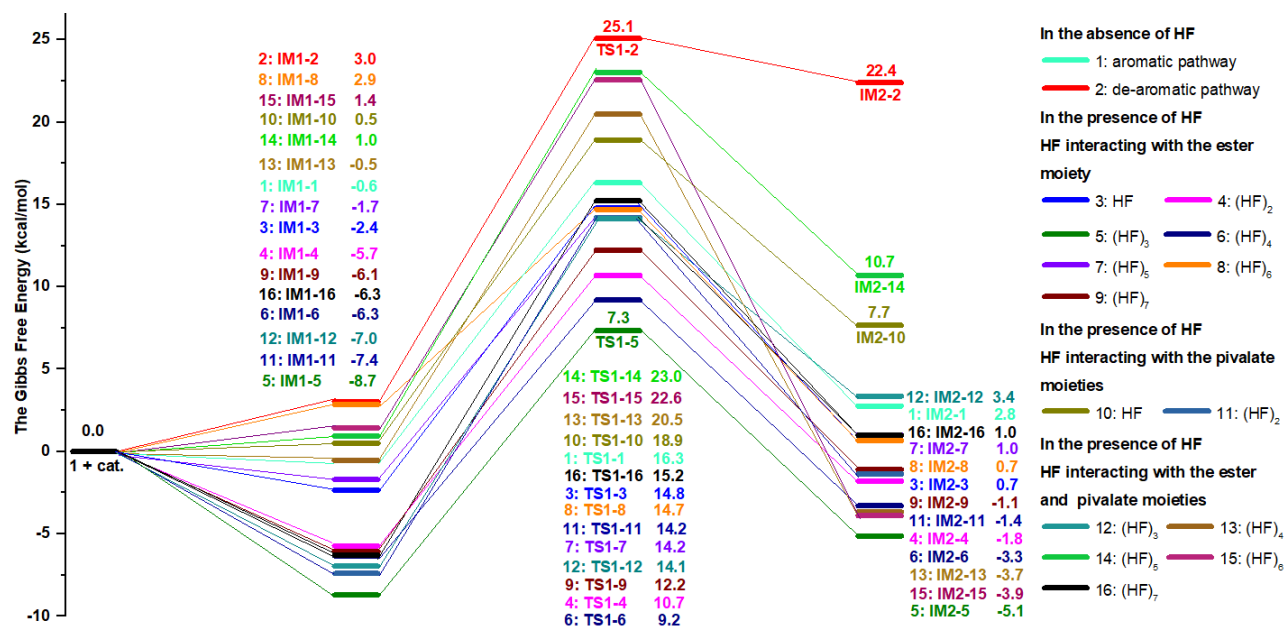

**Figure S1:** The Gibbs free energy profile (in kcal/mol) in ligand exchange reaction.

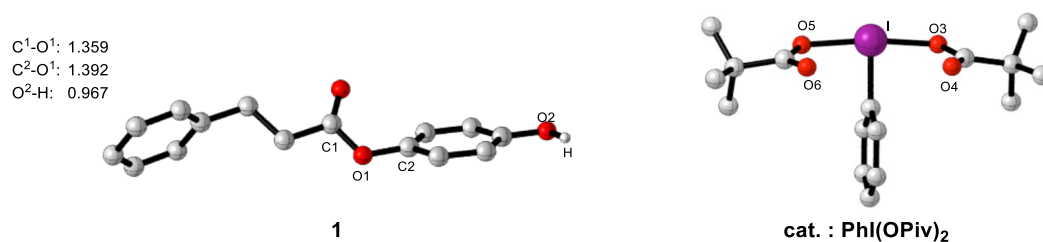

**Figure S2:** Optimized geometries of **1** and hypervalent iodine reagent PhI(OPiv)<sub>2</sub> (Some hydrogen atoms are omitted for clarify. Bond distance is in Å.)

(1) Geometry changes in the reaction with the OH group affording I-O bond in the absence of HF molecule

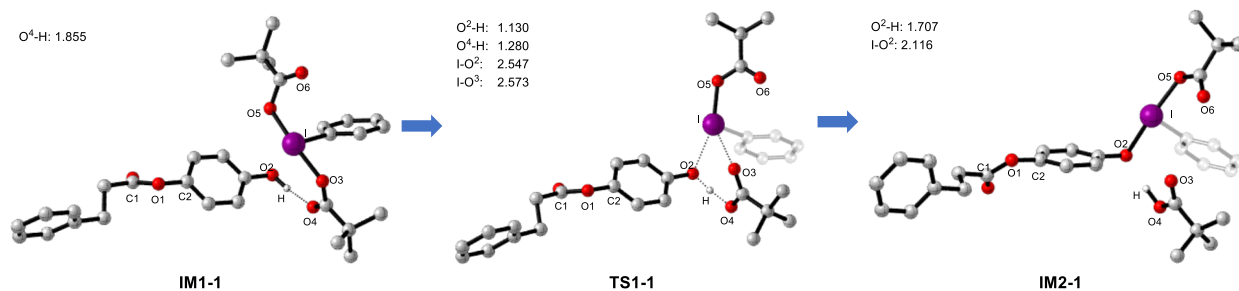

(2) Geometry changes in the reaction with the OH group affording I-C bond at the ortho position in the absence of HF molecule

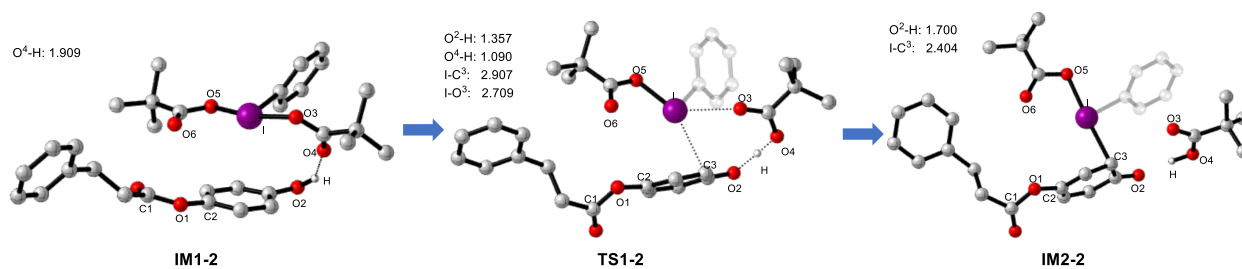

**Figure S3:** Geometry changes in the reaction of hypervalent iodine reagent  $\text{PhI}(\text{OPiv})_2$  with substrate ester affording aromatic intermediate with I-O bond and de-aromatic intermediate with I-C bond in the absence of HF molecule

(Some hydrogen atoms are omitted for clarify. Bond distance is in Å.)

(3) Geometry changes in the presence of HF interacting with the ester moiety

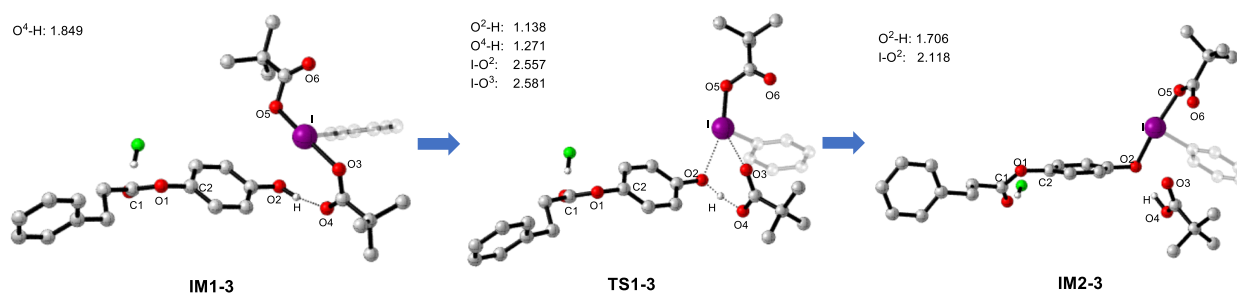

(4) Geometry changes in the presence of  $(\text{HF})_2$  interacting with the ester moiety

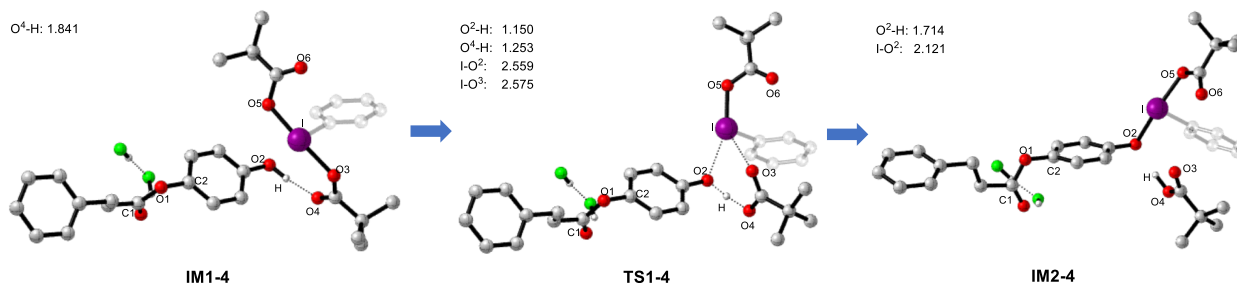

(5) Geometry changes in the presence of  $(\text{HF})_3$  interacting with the ester moiety

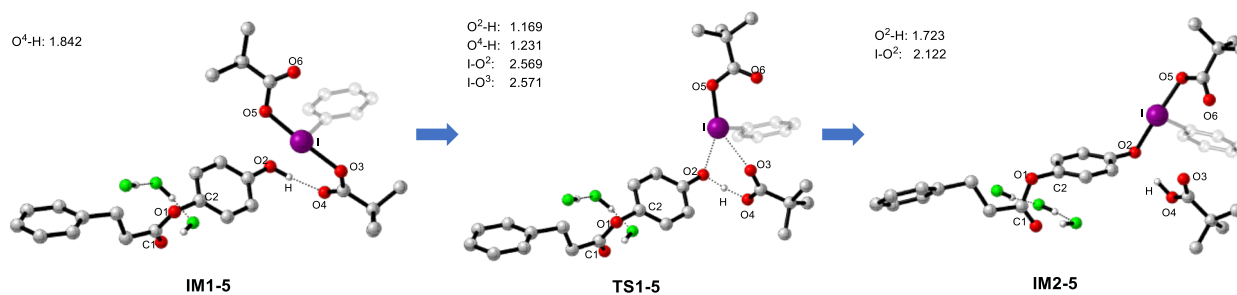

(6) Geometry changes in the presence of (HF)<sub>4</sub> interacting with the ester moiety

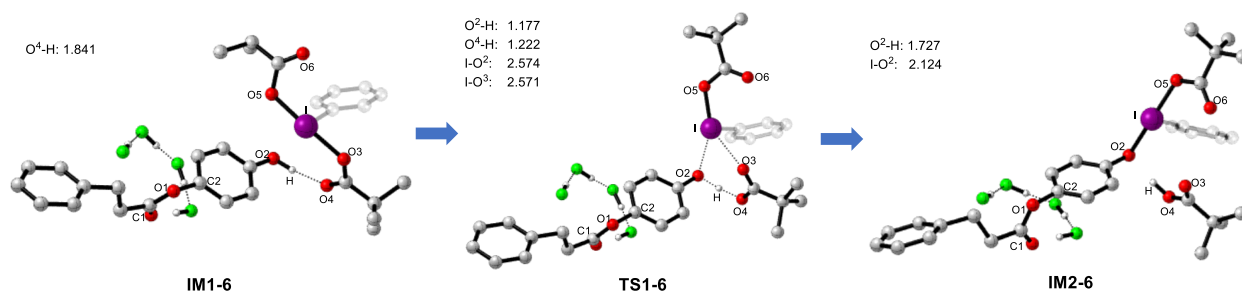

(7) Geometry changes in the presence of (HF)<sub>5</sub> interacting with the ester moiety

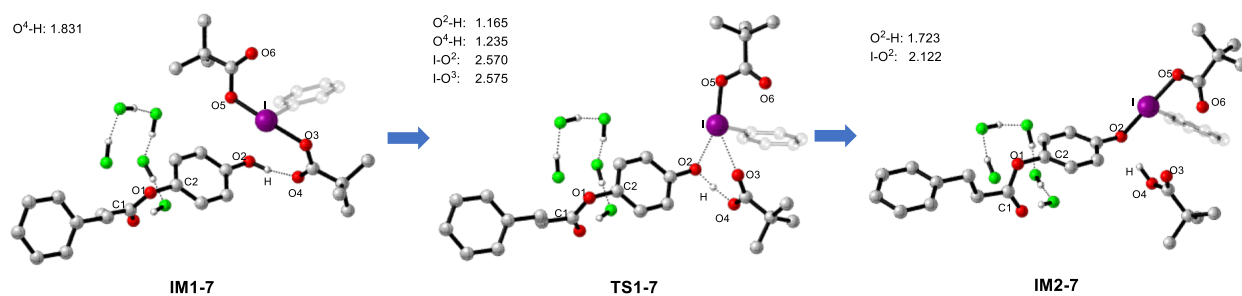

(8) Geometry changes in the presence of (HF)<sub>6</sub> interacting with the ester moiety

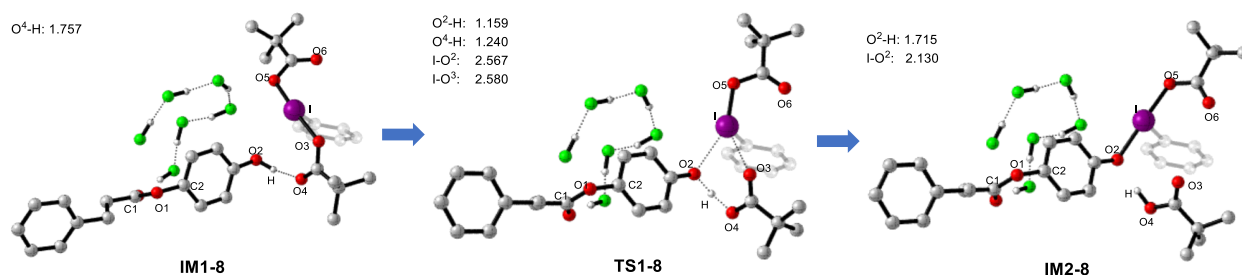

(9) Geometry changes in the presence of (HF)<sub>7</sub> interacting with the ester moiety

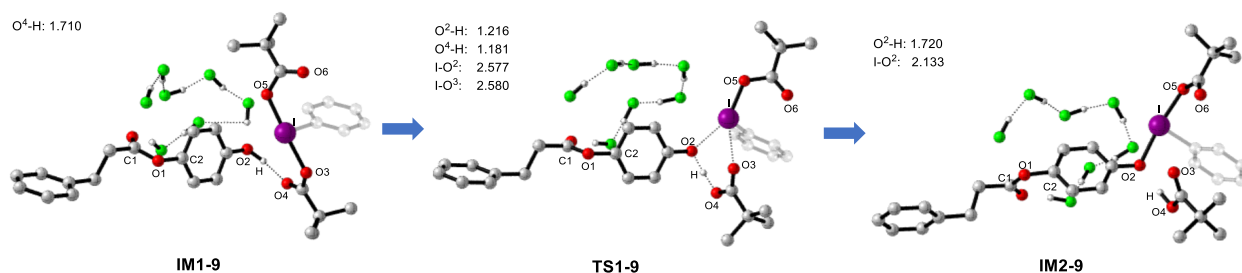

**Figure S4:** Geometry changes in the ligand exchange affording the aromatic intermediate in the presence of (HF)<sub>n</sub> cluster interacting with the ester moiety (n = 1-7) (Some hydrogen atoms are omitted for clarify. Bond distance is in Å.)

(10) Geometry changes in the presence of HF interacting with the pivalate moiety

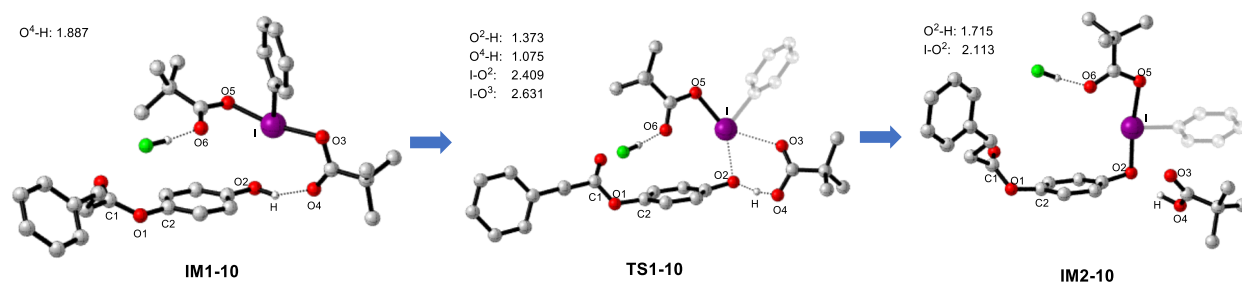

(11) Geometry changes in the presence of  $(HF)_2$  interacting with the pivalate moiety

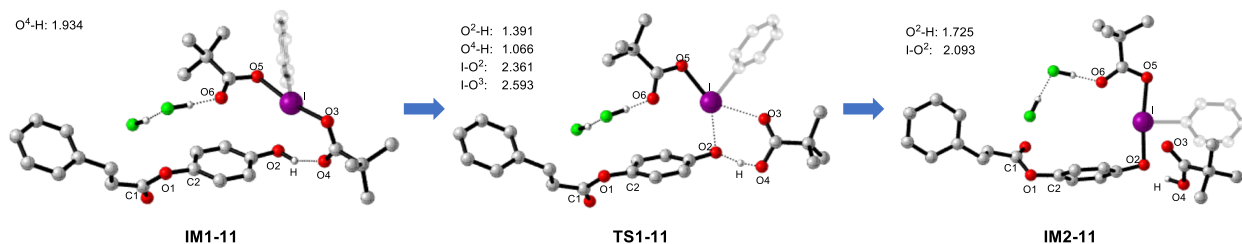

(12) Geometry changes in the presence of  $(HF)_3$  interacting with the pivalate and ester moieties

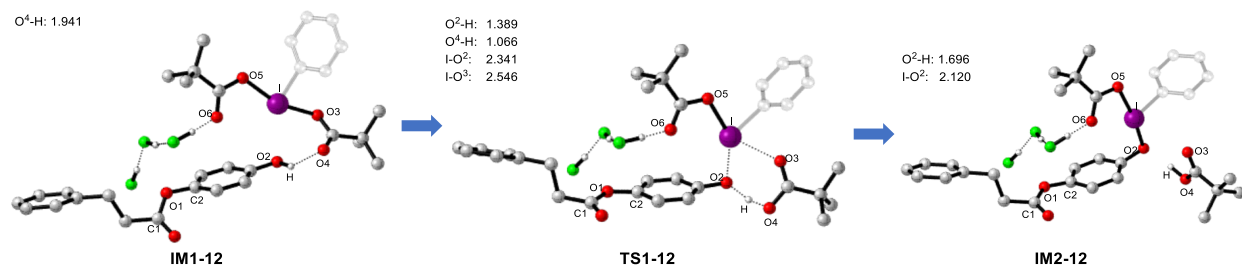

(13) Geometry changes in the presence of  $(HF)_4$  interacting with the pivalate and ester moieties

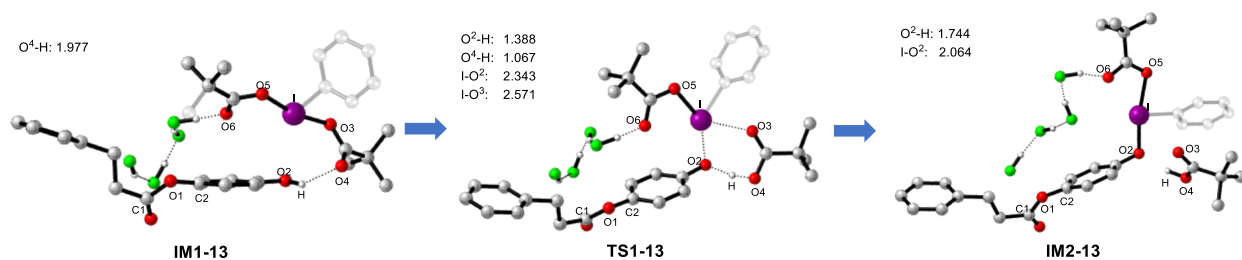

(14) Geometry changes in the presence of  $(HF)_5$  interacting with the pivalate and ester moieties

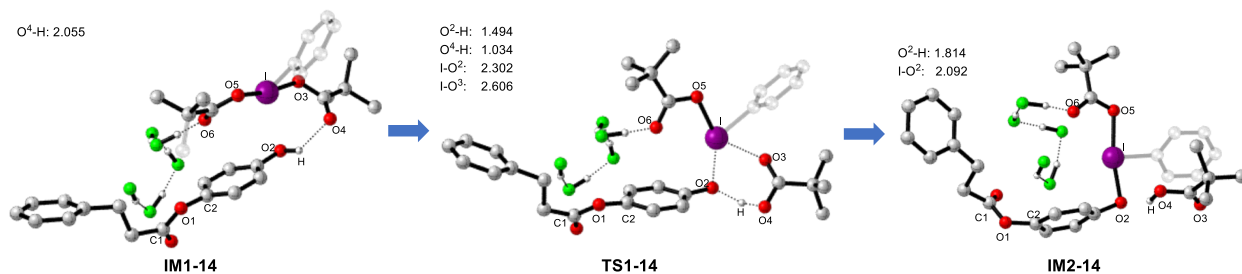

(15) Geometry changes in the presence of (HF)<sub>6</sub> interacting with the pivalate and ester moieties

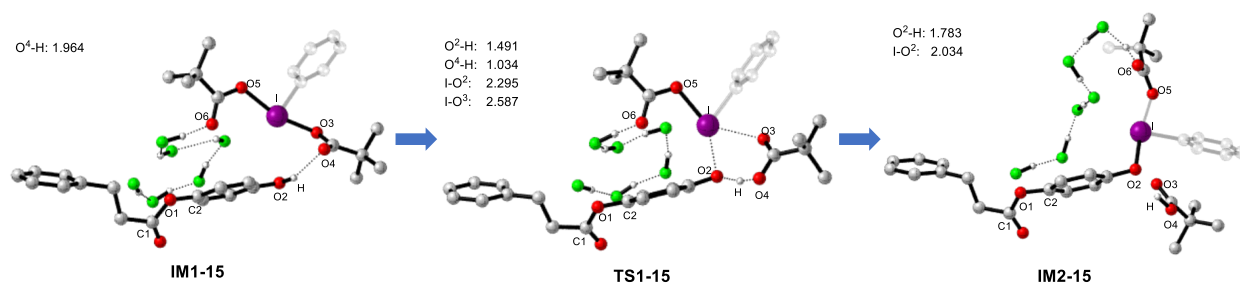

(16) Geometry changes in the presence of (HF)<sub>7</sub> interacting with the pivalate and ester moieties

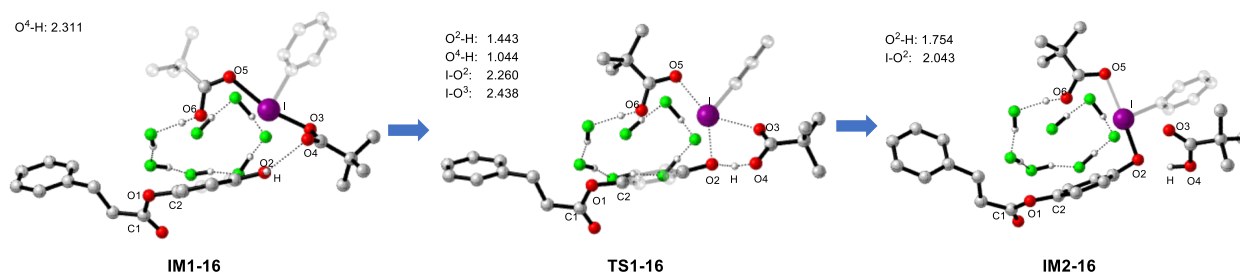

**Figure S5:** Geometry changes in the ligand exchange affording the aromatic intermediate in the presence of (HF)<sub>n</sub> cluster interacting with the pivalate and/or ester moieties (n = 1-7) (Some hydrogen atoms are omitted for clarify. Bond distance is in Å.)

### 6-3. Discussion of Reaction of HF Molecule with Aromatic Intermediate

We investigated the reaction of HF with the aromatic intermediate using various (HF)<sub>n</sub> (n = 1-7) clusters, as shown in Figure S6. When HF molecules participate in this process, the  $\Delta G^{\ddagger}$  value decreases sharply, as clearly shown by comparison of the reaction with one HF molecule and that with two HF molecules in Figure S6; the corresponding geometry changes are displayed in Figures S7 and S8. Because (HF)<sub>2</sub> cluster does not simultaneously interact with both the ester and pivalate moieties (Figure S7b), the energy change still somewhat differs from the other energy changes in the presence of (HF)<sub>3</sub> to (HF)<sub>7</sub> clusters. In the presence of (HF)<sub>3</sub> cluster, both the ester and pivalate moieties seem to interact with (HF)<sub>3</sub> (Figure S7c). Though the energy changes in the presence of (HF)<sub>3</sub> to (HF)<sub>5</sub> are moderately different from each other probably because the HF chain is not long enough to induce some strain, the energy changes in the presence of (HF)<sub>6</sub> and (HF)<sub>7</sub> are similar to each other, indicating that these energy changes are useful for discussing the energy changes in the reaction in the presence of HF molecules. Actually, the (HF)<sub>6</sub> and (HF)<sub>7</sub> clusters can interact with both the ester and pivalate moieties, as shown in Figures S7f and S7g.

The  $\Delta G^{\ddagger}$  value is 6.4 kcal/mol for **TS1** and 11.7 kcal/mol for **TS2** in the presence of (HF)<sub>6</sub>. Both are much smaller than the  $\Delta G^{\ddagger}$  value of the ligand exchange via de-aromatization pathway, indicating that the reaction occurs without de-aromatization intermediate. We presented discussion in the main text using the computational results with the (HF)<sub>6</sub> cluster.

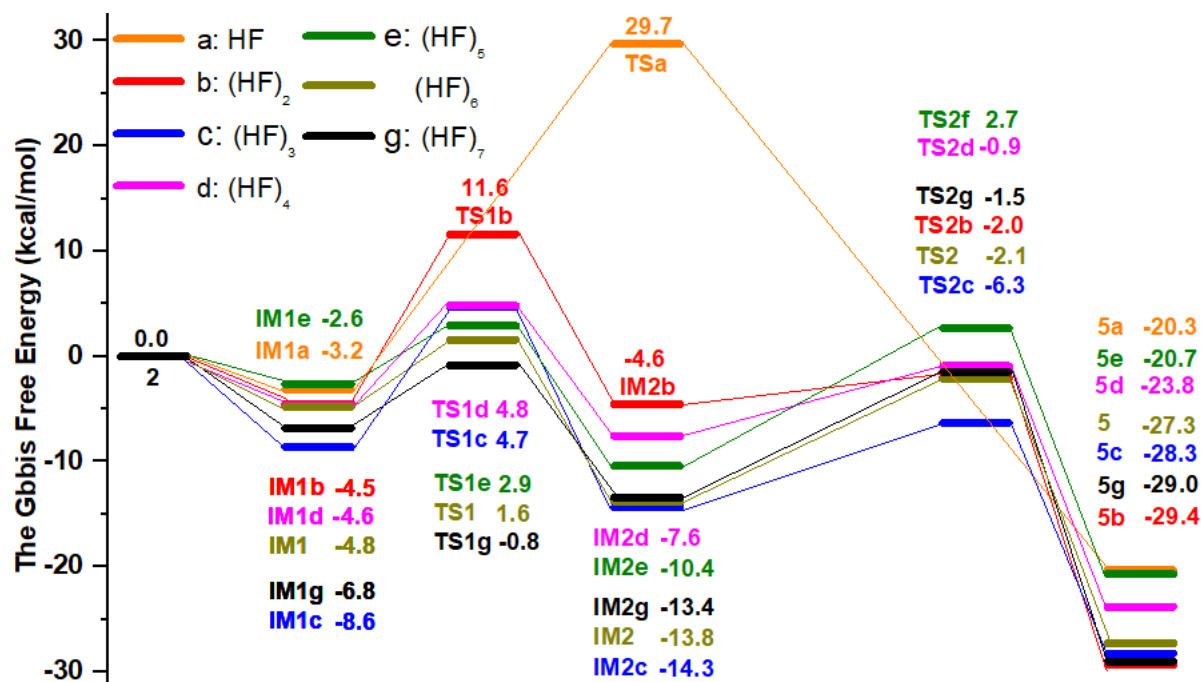

**Figure S6:** The Gibbs free energy profile (in kcal/mol) for I-O bond cleavage and  $\text{F}^-$  nucleophilic attack.

#### (a) Geometry changes in the reaction of HF with **2**

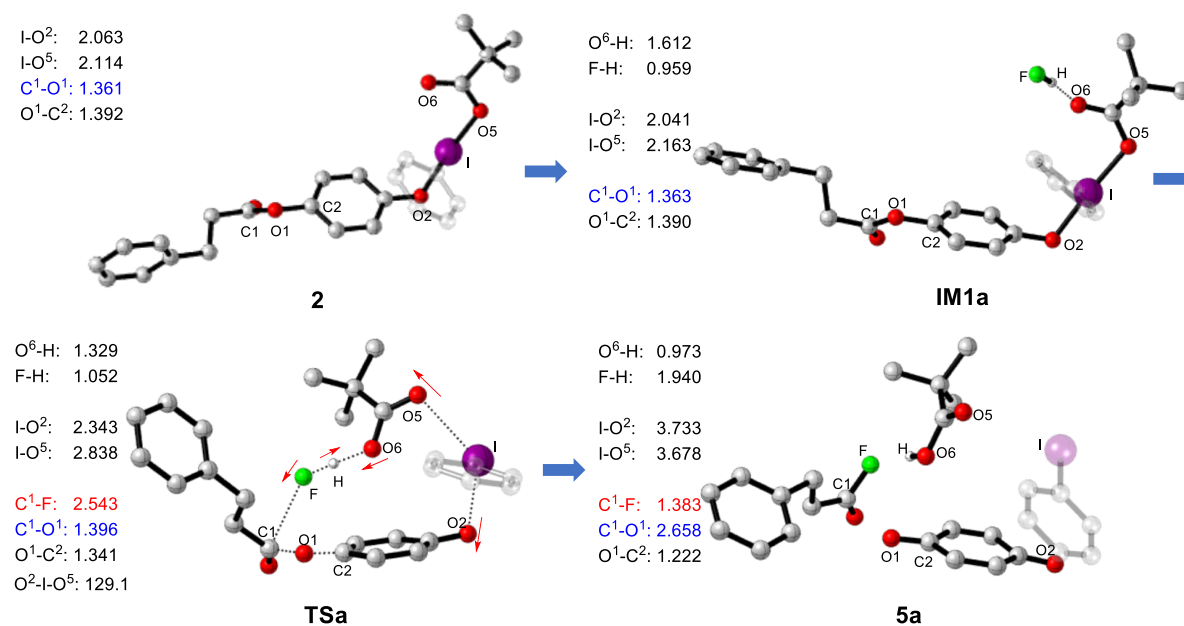

(b) Geometry changes in the reaction of (HF)<sub>2</sub> with 2

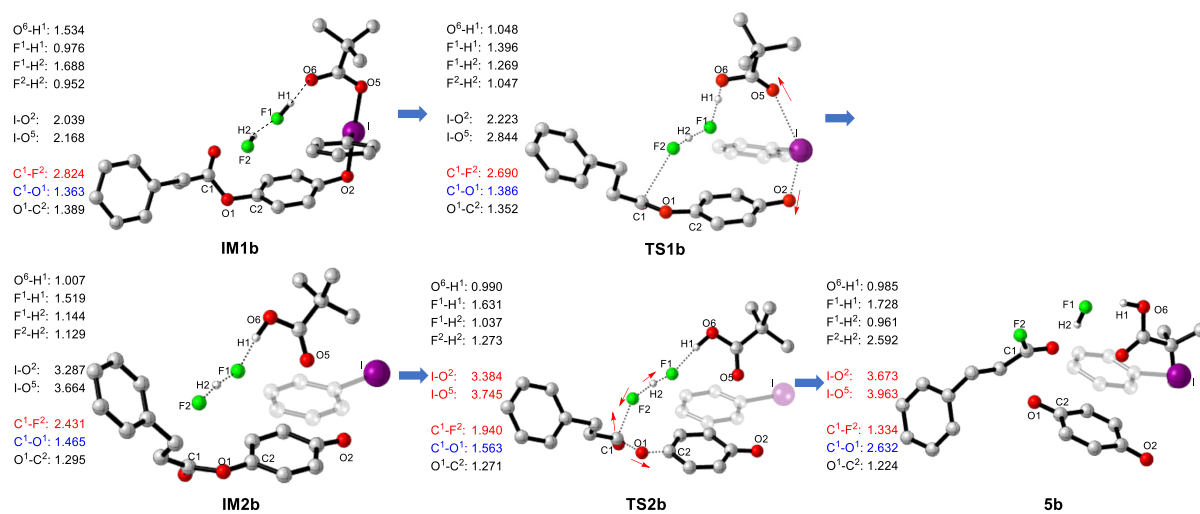

(c) Geometry changes in the reaction of (HF)<sub>3</sub> with 2

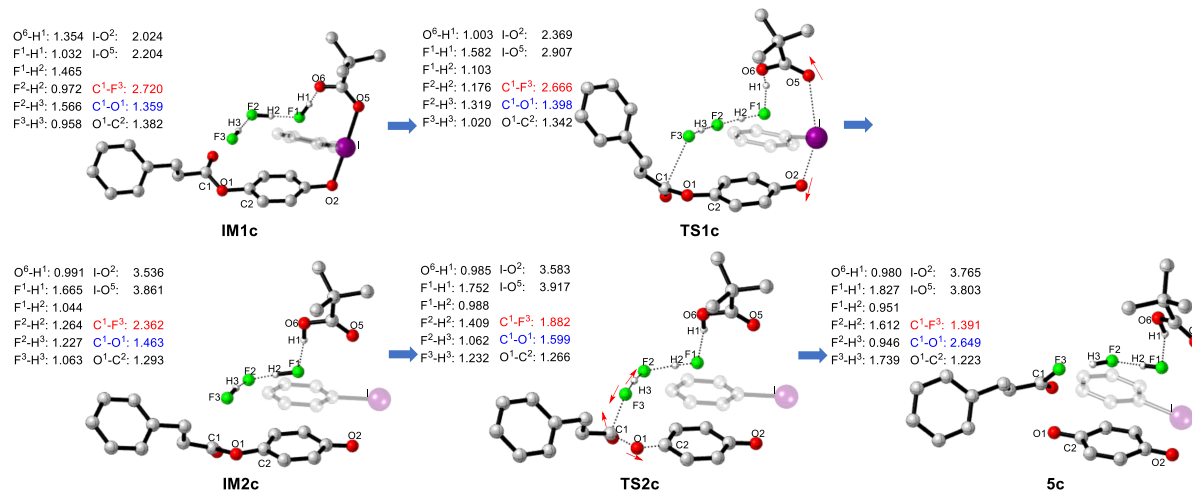

(d) Geometry changes in the reaction of (HF)<sub>4</sub> with 2

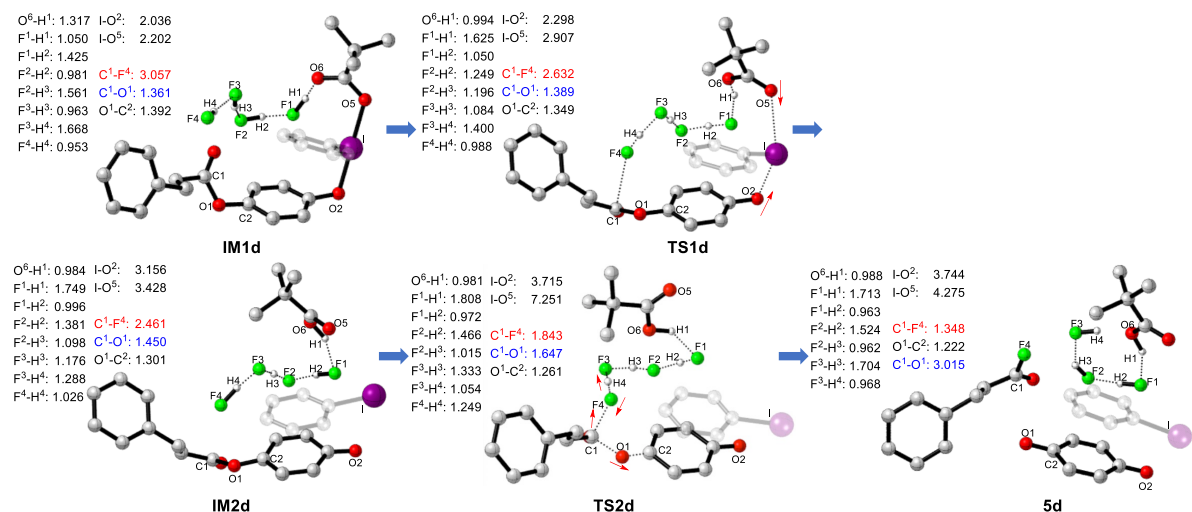

(e) Geometry changes in the reaction of (HF)<sub>5</sub> with 2

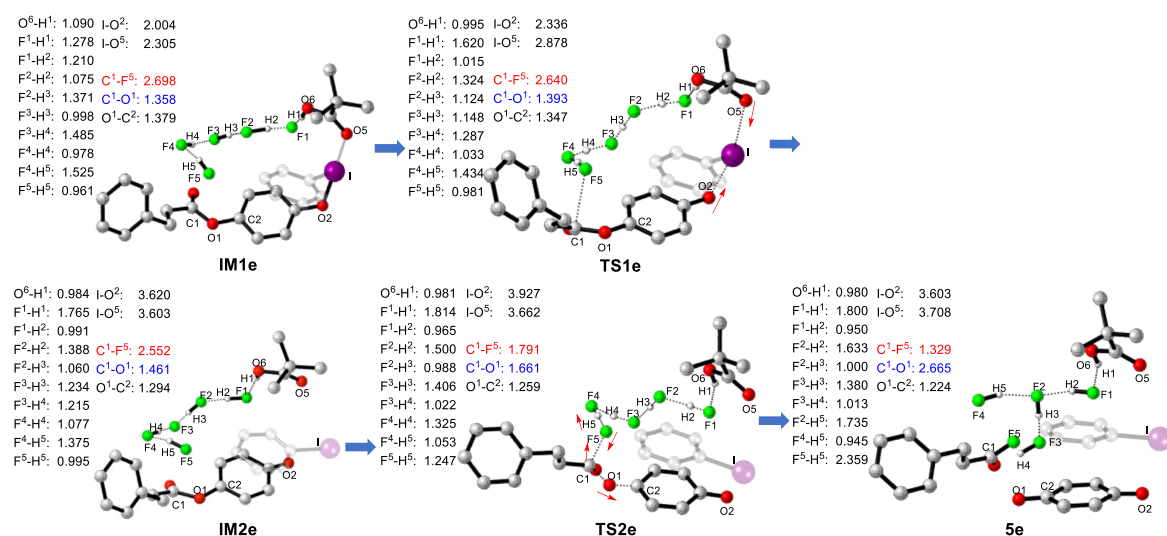

(f) Geometry changes in the reaction of (HF)<sub>6</sub> with 2

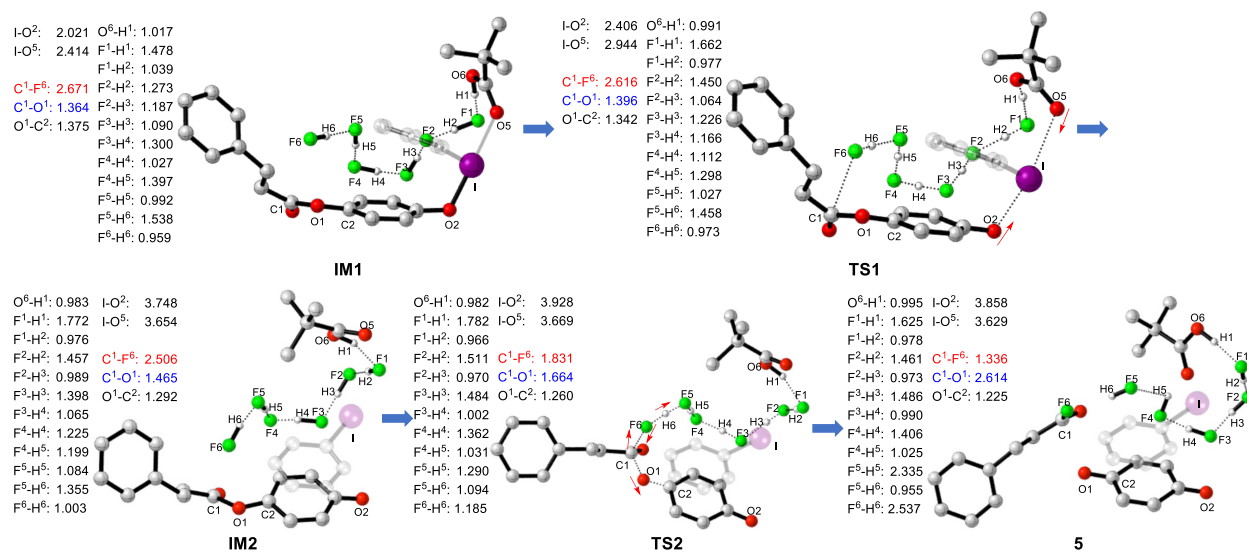

(g) Geometry changes in the reaction of (HF)<sub>7</sub> with 2

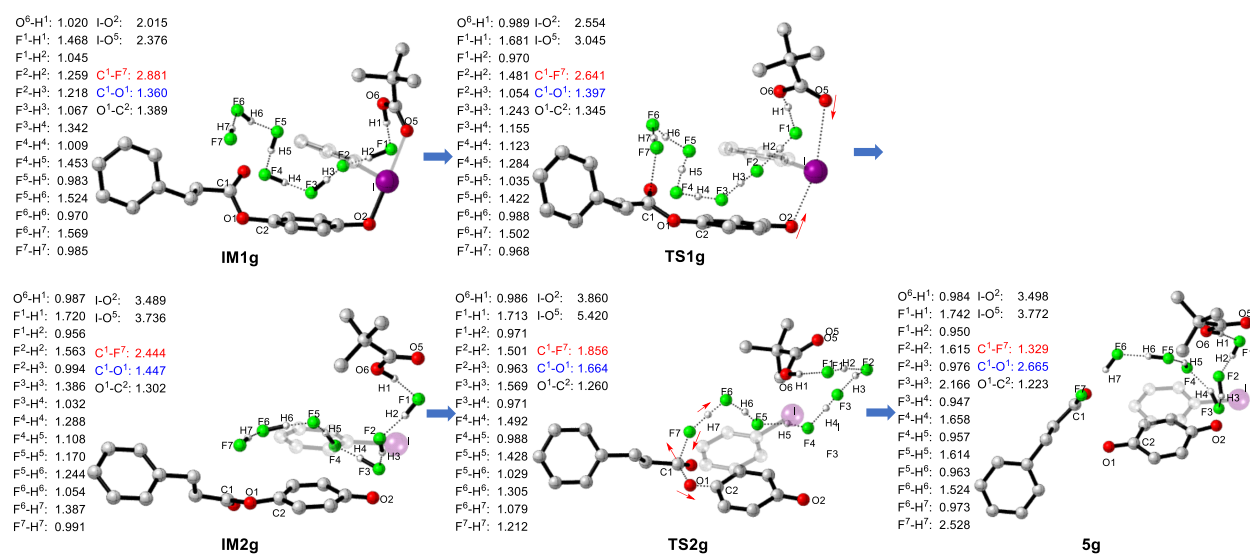

**Figure S7.** Geometry changes in the reaction of I-O bond cleavage and F<sup>-</sup> nucleophilic attack assisted by (HF)<sub>n</sub> cluster (n = 1-7)

(Some hydrogen atoms are omitted for clarify. Red arrows in TS represent movements of reaction-center atoms. Bond distance is in Å.)

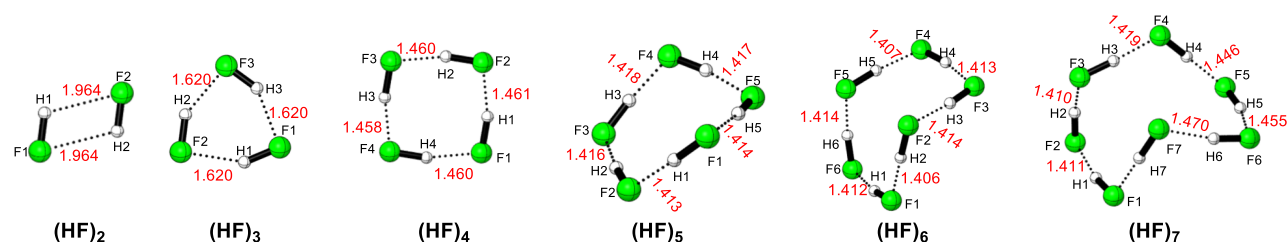

**Figure S8.** Optimized geometries of (HF)<sub>n</sub> cluster (n = 2-7).  
(Bond distance is in Å.)

## 6-4. Cartesian Coordinates

|   |             |             |             |      |             |             |             |   |             |             |             |
|---|-------------|-------------|-------------|------|-------------|-------------|-------------|---|-------------|-------------|-------------|
| I |             |             |             | C    | -3.11235100 | -1.02325500 | -0.16435400 | H | 0.11506300  | 4.85261900  | -0.00845200 |
| C | 5.51705300  | 1.20576400  | 0.50737300  | C    | -4.63301900 | 1.31594500  | -0.23733700 | O | -2.10115700 | -0.88908100 | -0.61988900 |
| C | 4.24043700  | 0.82432900  | 0.91061300  | H    | -2.74560200 | 2.32919400  | -0.51841200 | O | 2.07554500  | -0.93447900 | -0.61200500 |
| C | 3.60398600  | -0.27411000 | 0.32819800  | C    | -4.49121900 | -1.08474100 | -0.02180700 | C | -2.74523500 | -0.54718200 | 0.49375400  |
| C | 4.27507800  | -0.98296400 | -0.67086600 | H    | -2.51601200 | -1.92628500 | -0.13078000 | C | 2.71945700  | -0.59436900 | 0.50263900  |
| C | 5.55175800  | -0.60596300 | -1.07802800 | C    | -5.25598100 | 0.08257600  | -0.05707700 | O | 2.16793200  | -0.44103200 | 1.57337500  |
| C | 6.17650300  | 0.49084800  | -0.48938400 | H    | -5.22441100 | 2.22758800  | -0.26987500 | O | -2.19419900 | -0.39240400 | 1.56467200  |
| H | 5.99890000  | 2.05910900  | 0.97468300  | H    | -4.99666500 | -2.03364700 | 0.11878300  | C | -4.23913300 | -0.31448700 | 0.26322900  |
| H | 3.72969400  | 1.38149600  | 1.69274200  | O    | -6.60345300 | -0.04880600 | 0.08684500  | C | 4.21195000  | -0.35473400 | 0.27147300  |
| H | 3.79186800  | -1.84309500 | -1.12892500 | H    | -7.01435300 | 0.82643400  | 0.05478800  | C | 4.82826400  | -1.55048800 | -0.46372200 |
| H | 6.06093200  | -1.17156100 | -1.85235800 |      |             |             |             | H | 4.33931000  | -1.71187400 | -1.42725400 |
| H | 7.17320600  | 0.78444600  | -0.80317800 |      |             |             |             | H | 5.89385500  | -1.36596400 | -0.63745400 |
| C | 2.19978000  | -0.65179800 | 0.73122100  | Cat. |             |             |             | H | 4.73619900  | -2.46662200 | 0.12926500  |
| H | 2.05247100  | -1.73318100 | 0.64497200  | C    | 0.01905500  | 1.02989500  | -0.31217800 | C | 4.89822800  | -0.13770800 | 1.61860900  |
| H | 2.01915900  | -0.39701800 | 1.78022200  | C    | 0.06445400  | 1.79168100  | -1.47604400 | H | 5.96466400  | 0.05720800  | 1.46362500  |
| C | 1.16579400  | 0.06371000  | -0.13889000 | C    | 0.00892000  | 1.59524800  | 0.95882800  | H | 4.45709000  | 0.70984800  | 2.14870100  |
| H | 1.29296700  | -0.19097800 | -1.19752300 | C    | 0.09870800  | 3.17869600  | -1.35635600 | H | 4.79388100  | -1.01952200 | 2.25716800  |
| H | 1.28658900  | 1.15185600  | -0.07831700 | H    | 0.07388900  | 1.31907000  | -2.45219800 | C | 4.32771000  | 0.90881200  | -0.59702500 |
| C | -0.24835900 | -0.27664900 | 0.26564400  | C    | 0.04325100  | 2.98501000  | 1.05354600  | H | 3.85842400  | 1.76659800  | -0.10243600 |
| O | -0.56092300 | -0.99379700 | 1.17743800  | H    | -0.02422900 | 0.96533700  | 1.83852100  | H | 5.38366700  | 1.14602300  | -0.76541800 |
| O | -1.13038000 | 0.35086400  | -0.55524400 | C    | 0.08790900  | 3.77110600  | -0.09541100 | H | 3.84304300  | 0.76015000  | -1.56581500 |
| C | -2.49820000 | 0.21489700  | -0.33687000 | H    | 0.13394300  | 3.79245300  | -2.25040300 | C | -4.85174400 | -1.52496300 | -0.45113000 |
| C | -3.24971000 | 1.37967100  | -0.37496000 | H    | 0.03621400  | 3.44996900  | 2.03376400  | H | -5.91907900 | -1.34906100 | -0.62304500 |

|   |             |             |             |
|---|-------------|-------------|-------------|
| H | -4.36599500 | -1.69809000 | -1.41427300 |
| H | -4.75204700 | -2.43141700 | 0.15537300  |
| C | -4.92216800 | -0.08066600 | 1.60922200  |
| H | -4.48352400 | 0.77686000  | 2.12525800  |
| H | -5.98994200 | 0.10711700  | 1.45466200  |
| H | -4.81158800 | -0.95224000 | 2.26057900  |
| C | -4.36548200 | 0.93433400  | -0.62440400 |
| H | -5.42345900 | 1.16125200  | -0.79419200 |
| H | -3.90189500 | 1.80304700  | -0.14391600 |
| H | -3.88163500 | 0.77433900  | -1.59170200 |

**HF**

|   |            |            |             |
|---|------------|------------|-------------|
| F | 0.00000000 | 0.00000000 | 0.09306600  |
| H | 0.00000000 | 0.00000000 | -0.83759200 |

**(HF)<sub>2</sub>**

|   |             |             |            |
|---|-------------|-------------|------------|
| F | 0.00000000  | 1.23469800  | 0.00000000 |
| H | 0.69279600  | 0.60309500  | 0.00000000 |
| F | 0.00000000  | -1.23469800 | 0.00000000 |
| H | -0.69279600 | -0.60309500 | 0.00000000 |

**(HF)<sub>3</sub>**

|   |             |             |            |
|---|-------------|-------------|------------|
| F | -0.95653200 | 1.06703300  | 0.00000000 |
| H | 0.00000000  | 1.10621600  | 0.00000000 |
| F | -0.44581200 | -1.36189700 | 0.00000000 |
| H | -0.95801100 | -0.55310800 | 0.00000000 |
| F | 1.40234400  | 0.29486400  | 0.00000000 |
| H | 0.95801100  | -0.55310800 | 0.00000000 |

**(HF)<sub>4</sub>**

|   |             |             |             |
|---|-------------|-------------|-------------|
| F | 1.70600900  | 0.14176300  | 0.00192600  |
| H | -0.88036800 | 1.06127900  | -0.00053400 |
| F | -0.14173400 | 1.70412000  | -0.00192600 |
| H | 1.06303500  | 0.87978400  | 0.00049800  |
| F | 0.14133200  | -1.70463800 | -0.00192900 |
| H | 0.88036000  | -1.06317700 | -0.00047700 |
| F | -1.70558900 | -0.14106800 | 0.00192900  |
| H | -1.06318200 | -0.87948000 | 0.00050300  |

**(HF)<sub>5</sub>**

|   |             |             |             |
|---|-------------|-------------|-------------|
| F | -1.12130300 | -1.55824300 | -0.43794500 |
| H | 1.08810100  | 1.27060300  | -0.09647800 |
| F | 1.86794400  | 0.71216200  | 0.13445300  |
| H | -0.16515200 | -1.64736000 | -0.20594800 |
| F | 1.19600900  | -1.59211300 | 0.16843500  |
| H | 1.52861100  | -0.66262500 | 0.15861900  |
| F | -0.12913300 | 1.92623500  | -0.41159800 |
| H | -0.87850200 | 1.42035800  | -0.01641000 |
| F | -1.80853700 | 0.51144000  | 0.54681800  |
| H | -1.61790900 | -0.37646700 | 0.15873600  |

**(HF)<sub>6</sub>**

|   |             |             |             |
|---|-------------|-------------|-------------|
| F | -1.88282200 | -1.26905600 | -0.32476900 |
| H | 0.71783800  | 1.44988300  | 0.44290800  |
| F | -0.14699400 | 1.50310000  | 0.92001500  |
| H | -2.00336600 | -0.30064000 | -0.48204800 |
| F | -1.95382300 | 1.10681300  | -0.59335600 |
| H | -1.23396600 | 1.37753200  | 0.02487800  |
| F | 1.88250400  | 1.26925900  | -0.32456800 |
| H | 2.00315600  | 0.30069800  | -0.48209700 |
| F | 0.14731700  | -1.50399700 | 0.91962600  |
| H | -0.71753900 | -1.45005300 | 0.44279500  |
| F | 1.95380400  | -1.10611300 | -0.59371500 |
| H | 1.23399900  | -1.37747000 | 0.02446500  |

**(HF)<sub>7</sub>**

|   |             |             |             |
|---|-------------|-------------|-------------|
| F | -1.38699400 | -1.93647000 | -0.00476700 |
| H | 1.14703200  | 1.44317800  | -0.31303400 |
| F | 0.66329700  | 2.00464900  | 0.32763100  |
| H | -1.89323800 | -1.25109300 | -0.50906300 |
| F | -2.40942400 | -0.05059500 | -1.04119300 |
| H | -2.13072300 | 0.59386200  | -0.34579400 |
| F | 1.85359900  | 0.60378600  | -1.25453900 |
| H | 2.24845100  | -0.14822000 | -0.76840300 |
| F | 0.33614900  | -0.63993800 | 1.02059400  |
| H | -0.38535400 | -1.21304700 | 0.65489700  |
| F | 2.51805600  | -1.21696800 | 0.18132300  |
| H | 1.67449000  | -1.12985700 | 0.66099100  |
| F | -1.57730500 | 1.25555000  | 0.76981400  |
| H | -0.63705800 | 1.52505400  | 0.63063300  |

**2**

|   |              |             |             |
|---|--------------|-------------|-------------|
| C | -9.86609800  | -0.60865900 | 0.24250200  |
| C | -8.66935600  | 0.08122100  | 0.07108400  |
| C | -7.45926200  | -0.60591600 | -0.04822000 |
| C | -7.47213300  | -2.00111300 | 0.01157800  |
| C | -8.66633200  | -2.69574500 | 0.18311500  |
| C | -9.86740100  | -2.00032500 | 0.29888200  |
| H | -10.79857000 | -0.05943900 | 0.32900900  |
| H | -8.67116900  | 1.16787000  | 0.02477500  |
| H | -6.53566400  | -2.54638400 | -0.08192900 |
| H | -8.65945900  | -3.78067900 | 0.22265400  |
| H | -10.79992700 | -2.54011500 | 0.42965000  |
| C | -6.15749300  | -0.14526600 | -0.18181500 |
| H | -5.42897000  | -0.45022600 | -0.73985600 |
| H | -6.31611500  | 1.07450900  | -0.74063100 |
| C | -5.57140600  | 0.48181700  | 1.20100300  |
| H | -5.37800000  | -0.45028800 | 1.74441100  |
| H | -6.27373700  | 1.07977900  | 1.78550700  |
| C | -4.28091500  | 1.25991600  | 1.10922100  |
| O | -4.07597000  | 2.34095700  | 1.58934900  |

|   |             |             |             |
|---|-------------|-------------|-------------|
| O | -3.36477300 | 0.55605200  | 0.38915100  |
| C | -2.10576300 | 1.09756200  | 0.14684300  |
| C | -1.31328300 | 1.62513300  | 1.16180500  |
| C | -1.63579600 | 1.01493700  | -1.15792800 |
| C | -0.03633800 | 2.07929500  | 0.85423300  |
| H | -1.69561700 | 1.69196000  | 2.17265800  |
| C | -0.35477600 | 1.46241700  | -1.45830900 |
| C | -2.27733600 | 0.59025000  | -1.92296100 |
| C | 0.45244300  | 2.00511900  | -0.45434900 |
| H | 0.59388300  | 2.50423500  | 1.62992700  |
| H | 0.04091200  | 1.39432500  | -2.46666300 |
| O | 1.70028700  | 2.44914500  | -0.76684200 |
| I | 3.28822000  | 1.30953700  | -0.10593600 |
| C | 2.50985700  | -0.22018300 | -1.29776300 |
| C | 1.70208500  | -1.18702000 | -0.70803200 |
| C | 2.71005000  | -0.14980200 | -2.67365200 |
| C | 1.09162000  | -2.12722500 | -1.53635600 |
| H | 1.56734600  | -1.20988700 | 0.36681000  |
| C | 2.09273500  | -1.10027800 | -3.48229200 |
| H | 3.32690300  | 0.62985000  | -3.10751900 |
| C | 1.28537600  | -2.08417100 | -2.91410100 |
| H | 0.45569300  | -2.88852800 | -1.09697000 |
| H | 2.24209300  | -1.06728800 | -4.55657000 |
| H | 0.80293400  | -2.81884400 | -3.55079400 |
| C | 4.71003900  | -0.96946100 | 1.12929200  |
| O | 3.62623700  | -1.20573100 | 1.62963200  |
| C | 5.95729200  | -1.82336500 | 1.36931900  |
| O | 4.92978000  | 0.04137100  | 0.29891400  |
| C | 6.35956300  | -2.45192500 | 0.02653300  |
| H | 6.59528400  | -1.67903000 | -0.70947500 |
| H | 7.24203300  | -3.08559500 | 0.16575500  |
| H | 5.55170600  | -3.07567100 | -0.37128100 |
| C | 7.09169900  | -0.92632600 | 1.88152600  |
| H | 6.81914100  | -0.45034000 | 2.82961100  |
| H | 7.98974000  | -1.52966500 | 2.05232200  |
| C | 7.32848000  | -0.14417500 | 1.15621400  |
| C | 5.63132000  | -2.91137900 | 2.39036300  |
| H | 5.32012600  | -2.47354700 | 3.34279200  |
| H | 4.81627100  | -3.54757100 | 2.03592300  |
| H | 6.51552200  | -3.53409000 | 2.56282400  |

**IM1a**

|   |              |             |             |
|---|--------------|-------------|-------------|
| C | -8.67381700  | 2.28847700  | 1.10929700  |
| C | -7.42377500  | 1.72558400  | 0.86705800  |
| C | -7.15351000  | 1.07906200  | -0.34080800 |
| C | -8.16377600  | 1.00490500  | -1.30235100 |
| C | -9.41510400  | 1.56638600  | -1.06510300 |
| C | -9.67340600  | 2.20992300  | 0.14280600  |
| H | -8.86607200  | 2.79192000  | 2.05175200  |
| H | -6.64332200  | 1.79156600  | 1.62168500  |
| H | -7.96360100  | 0.50533300  | -2.24752500 |
| H | -10.18795700 | 1.50406500  | -1.82497800 |
| H | -10.64774300 | 2.65058800  | 0.32865900  |
| C | -5.81578200  | 0.42242300  | -0.57828200 |
| H | -5.55762200  | 0.47137100  | -1.64221800 |
| H | -5.02935900  | 0.94752900  | -0.02831100 |
| C | -5.84185100  | -1.05039400 | -0.13115100 |
| H | -6.61625000  | -1.60505400 | -0.66516700 |
| H | -6.06438300  | -1.09502500 | 0.94108500  |
| H | -4.52958200  | -1.75302500 | -0.37919900 |
| O | -4.37234800  | -2.73657900 | -1.04901100 |
| O | -3.52386500  | -1.10140500 | 0.26986800  |
| C | -2.22286700  | -1.58557200 | 0.20154000  |
| C | -1.61458300  | -1.93150400 | -1.00202600 |
| C | -1.52136800  | -1.63882000 | 1.39974300  |
| C | -0.28820900  | -2.34588200 | -0.99261200 |
| H | -2.17461300  | -1.89168600 | -1.92756400 |
| C | -0.19182100  | -2.04433000 | 1.40267600  |
| C | -2.02469300  | -1.35327200 | 2.31717800  |
| C | 0.42729500   | -2.41053400 | 0.20583100  |
| H | 0.20213400   | -2.63442600 | -1.91765300 |
| O | 0.38113700   | -2.08594900 | 2.32341300  |
| H | 1.72450600   | -2.83853100 | 0.22689100  |
| I | 3.14060000   | -1.52782400 | -0.43902400 |
| C | 2.65917100   | -0.24824200 | 1.14093300  |
| C | 1.74676300   | 0.77725800  | 0.91801900  |
| C | 3.28420200   | -0.44341500 | 2.37089600  |
| C | 1.47817800   | 1.65915900  | 1.96369900  |
| H | 1.27640800   | 0.91259700  | -0.04750800 |
| C | 2.98702300   | 0.43715600  | 3.40677500  |
| C | 3.98929500   | -1.25456500 | 2.51671300  |
| C | 2.09319600   | 1.48825400  | 3.19971700  |
| H | 0.80208300   | 2.48774200  | 1.78583900  |
| H | 3.46439800   | 0.30654400  | 4.37241900  |
| H | 1.88140100   | 2.18036300  | 4.00832000  |
| C | 4.29299200   | 1.11148100  | -1.17309500 |
| O | 3.16347600   | 1.30555900  | -1.63220600 |
| C | 5.26056400   | 2.25773100  | -0.89547500 |
| O | 4.69674100   | -0.06738900 | -0.78908300 |
| C | 4.90135100   | 2.71653700  | 0.53330900  |
| H | 5.02500200   | 1.89852100  | 1.25209100  |
| H | 5.56125900   | 3.53987500  | 0.82672600  |
| C | 3.86523300   | 3.06719500  | 0.56618600  |
| C | 6.71432100   | 1.78828300  | -0.95888300 |
| H | 6.96891200   | 1.42411400  | -1.95952700 |
| H | 7.37766600   | 2.62671000  | -0.72271100 |
| H | 6.89998100   | 0.98267000  | -0.24535800 |
| C | 5.00860800   | 3.40273600  | -1.87937400 |
| H | 5.17048900   | 3.08114900  | -2.91302200 |
| C | 3.98782000   | 3.77928000  | -1.78636800 |
| H | 5.69802700   | 4.22539000  | -1.66383400 |

|   |            |            |             |
|---|------------|------------|-------------|
| F | 1.88565500 | 3.30124000 | -0.67646200 |
| H | 2.34832500 | 2.61391200 | -1.15916400 |

**IM1b**

|   |             |             |             |
|---|-------------|-------------|-------------|
| C | -8.28130600 | 0.86665100  | 1.23818200  |
| C | -7.00490000 | 0.34242700  | 1.05613900  |
| C | -6.10806300 | 0.93518100  | 0.16388600  |
| C | -6.51943500 | 2.06529100  | -0.54598900 |
| C | -7.79521900 | 2.59359000  | -0.36788600 |
| C | -8.68011900 | 1.99514800  | 0.525559500 |
| H | -8.96406800 | 0.39613800  | 1.93915400  |
| H | -6.69438000 | -0.53715200 | 1.61575800  |
| H | -5.82857000 | 2.53561100  | -1.24177700 |
| H | -8.09723300 | 3.47528100  | -0.92487400 |
| H | -9.67425200 | 2.40710000  | 0.66781200  |
| C | -4.74380200 | 0.33595800  | -0.06629000 |
| H | -4.02520600 | 1.10278600  | -0.37006500 |
| H | -4.35912600 | -0.11184600 | 0.85606400  |
| C | -4.79696900 | -0.75410000 | -1.15746500 |
| H | -5.16217300 | -0.33279200 | -2.09648100 |
| H | -5.46563000 | -1.55996500 | -0.83970700 |
| C | -3.41337100 | -1.29702400 | -1.39281300 |
| O | -2.68968500 | -1.00040400 | -2.30507800 |
| O | -3.06857800 | -2.14323000 | -0.38092000 |
| C | -1.73235200 | -2.46654600 | -0.19788200 |
| C | -0.91197600 | -2.90329300 | -1.23272100 |
| C | -1.24780900 | -2.33752300 | 1.09901700  |
| C | 0.43782200  | -3.10841200 | -0.97446500 |
| H | -1.30794000 | -3.02117300 | -2.23214900 |
| C | 0.09913900  | -2.55787400 | 1.35435500  |
| H | -1.92474100 | -2.01109500 | 1.88111300  |
| C | 0.95431000  | -2.89       |             |

C 2.16487600 -0.00081800 1.28263400  
C 0.98495800 0.45848500 0.70482200  
C 2.58831900 0.39215600 2.55034700  
C 0.20215500 1.34998900 1.43780900  
H 0.66632900 0.13442900 -0.27984000  
C 1.79919300 1.29448300 3.25692300  
H 3.51228300 0.01236300 2.97324800  
C 0.61210500 1.76928200 2.70030500  
H -0.73027700 1.68722500 1.00130900  
H 2.11239400 1.61980100 4.24359500  
H -0.00238000 2.46666200 3.26063300  
C 4.01944200 1.44579500 -0.84232900  
O 3.03393200 1.36139400 -1.59887600  
C 4.64091900 2.81367600 -0.58129000  
O 4.53001900 0.46932800 -0.17435200  
F -1.94705900 0.61673100 -0.49982800  
H 0.31609700 -0.00827500 -2.51993700  
F -0.58750200 0.34071500 -2.59632400  
H -1.51293000 0.45200200 -1.33806900  
C 4.08703000 3.23406600 0.79101100  
H 4.42984000 2.56477700 1.57794300  
H 4.43468500 4.25474100 1.02437200  
H 2.99059900 3.24475700 0.79003800  
C 6.16744500 2.70562800 -0.51912400  
H 6.57957100 2.38929800 -1.48287700  
H 6.59212700 3.68449400 -0.27422700  
H 6.47993600 1.98739400 0.24188600  
C 4.20957100 3.80683000 -1.65955900  
C 4.54544300 3.48333400 -2.64926500  
H 3.12257700 3.90772900 -1.68992500  
H 4.64932700 4.78701700 -1.44925400  
F 1.69582300 -0.46626600 -2.34169200  
H 2.31636100 0.29430100 -2.02283800

IM1d

C 8.54340100 0.35343300 -0.97205300  
C 7.31386800 -0.30111300 -0.92553400  
C 6.16554800 0.37338900 -0.51172500  
C 6.26516000 1.71787700 -0.13882100  
C 7.49122100 2.37267900 -0.18478300  
C 8.63433800 1.69188300 -0.60211700  
H 9.42905800 -0.18287900 -1.29905100  
H 7.24396000 -1.34651700 -1.21687800  
H 5.36746000 2.23953200 0.18614100  
H 7.55590100 3.41766500 0.10292500  
H 9.59085600 2.20386000 -0.63953100  
C 4.83114600 -0.32332000 -0.41767900  
C 4.04705300 0.34034400 -0.79532200  
H 4.82480800 -1.23732200 -1.01954200  
C 4.49660600 -0.67282200 1.04765600  
H 4.65470700 0.20081800 1.68141000  
H 5.13072700 -1.49560900 1.39193200  
C 3.04744100 -1.04648000 1.16479900  
O 2.19202100 -0.37186500 1.67745000  
O 2.78651500 -2.23191800 0.54898000  
C 1.44925800 -2.55094300 0.33016700  
C 0.52429900 -2.59361600 1.36849100  
C 1.07493800 -2.80080500 -0.98381800  
C -0.81413900 -2.81518100 1.06736100  
H 0.83007900 -2.38274600 2.38486200  
C -0.26414900 -3.02557800 -1.28070900  
H 1.82828000 -2.76662200 -1.76369600  
C -1.21231500 -2.99326700 -0.25881200  
H -1.56475500 -2.77541700 1.85117900  
H -0.59852400 -3.16421100 -2.30336300  
O -2.54295400 -3.03076000 -0.59517000  
I -3.48973200 -1.24877700 -0.32623800  
C -1.87076700 -0.22533300 -1.17229500  
C -0.84345900 0.22186200 -0.34454400  
C -1.85355800 -0.06798600 -2.55583200  
C 0.24763100 0.85167400 -0.94269200  
H -0.86540800 0.07093200 0.72814000  
C -0.75761600 0.56994000 -3.12954200  
H -2.66916900 -0.43335400 -3.17069700  
C 0.28662800 1.02185100 2.32456700  
H 1.06222600 1.20639800 -0.32358700  
H -0.72198300 0.70709000 -4.20537800  
H 1.14240000 1.51279000 -2.77688900  
C -3.82602700 1.71796200 0.43654600  
O -3.09641200 1.55004300 1.43390200  
C -4.05831300 3.13114100 -0.08336200  
O -4.35597500 0.77490600 -0.26169700  
F 2.98853100 1.95619800 0.59550700  
H -1.04997700 -0.25927100 2.95725000  
F -0.08999900 -0.19032100 3.14670200  
H 2.30639900 1.76451900 1.23331900  
C -3.15017400 3.25236200 -1.32298100  
H -3.45306700 2.54239300 -2.09834600  
H -3.22418500 4.26672400 -1.72818800  
H -2.10214300 3.05941400 -1.06558900  
C -5.52443000 3.31223600 -0.48949200  
H -6.18815400 3.21652600 0.37601300  
H -5.66293900 4.31198500 -0.91330900  
H -5.82007900 2.57131600 -1.23548500  
C -3.65304200 4.15936200 0.97171600  
H -4.25324200 4.04902000 1.87975400  
H -2.60191500 4.04777700 1.24678600  
H -3.80907700 5.16767700 0.57524800  
F 0.79074100 1.80868000 1.92633900  
F 0.60555100 0.98603100 2.39165500  
F -2.40496500 -0.41848700 2.54428100

H -2.76490300 0.43118500 2.04341400  
  
IM1e  
C 8.83053200 1.10226200 -0.81304100  
C 7.70293400 0.29641900 -0.96087400  
C 6.48064600 0.67511300 -0.40693000  
C 6.40419300 1.87762300 0.30395100  
C 7.52721000 2.68380300 0.45317000  
C 8.74499300 2.29775800 -0.10601700  
H 9.77508800 0.79564100 -1.25214000  
H 7.77144800 -0.63627200 -1.51580600  
H 5.44910600 2.16923700 0.73649000  
H 7.45355600 3.61652200 1.00422300  
H 9.62186800 2.92730200 0.00890100  
C 5.25207200 -0.19241300 -0.52252900  
C 4.38431100 0.43292700 -0.74965500  
H 5.36219100 -0.91474800 -1.33666300  
C 4.97685900 -0.93267800 0.79645300  
H 5.11468800 -0.26568800 1.64951000  
H 5.67305900 -1.77195100 0.91514500  
C 3.56793600 -1.45188300 0.90953200  
C 2.89814700 -1.42685000 1.90831600  
O 3.13811300 -1.95871300 -0.27864500  
C 1.79856700 -2.23481400 -0.49713900  
C 0.94890500 -2.79046400 0.45774800  
C 1.34278200 -1.93339900 -1.77907700  
C -0.39180800 -2.97537700 0.13390300  
H 1.30354700 -3.02473300 1.45026700  
C 0.00486900 -2.12155000 -2.09557700  
H 2.04052600 -1.51817800 -2.49822500  
C -0.86454600 -2.61692700 -1.12426200  
H -1.08580800 -3.34348800 0.87994700  
H -0.38649100 -1.84998400 -3.07058300  
O -2.21228400 -2.69213600 -1.41964800  
I -3.33964500 -1.20372300 -0.67334900  
C -1.92752500 0.24338600 -1.17144100  
C -0.89203700 0.46501700 -0.26798000  
C -2.00507600 0.85880200 -2.41977200  
C 0.12973600 1.33330600 -0.65599800  
H -0.86080800 -0.03602000 0.69448100  
C -0.98721100 1.73963500 -2.77166800  
H -2.82856500 0.65470900 -3.09601600  
C 0.07790100 1.96298600 -1.89684500  
H 0.97749600 1.48268700 0.00262500  
H -1.02002300 2.23770600 -3.73519400  
H 0.87992200 2.63286100 -2.19003200  
C -4.26269100 1.62644300 0.66919200  
O -3.85377400 1.36917000 1.86166800  
C -4.33672300 3.09985100 0.31231600  
H -4.54781200 0.74968400 -0.17720600  
O -2.90448600 -1.25712600 2.35320700  
F -1.77851700 -1.44107800 2.07121600  
C -2.87945400 3.60008800 0.25813100  
H -2.30715800 3.37090400 -0.51417700  
H -2.88089300 4.66712800 0.01320800  
H -2.37881800 3.46090600 1.21981100  
H -5.00256200 3.28096900 -1.05037100  
H -6.02288700 2.88701500 -1.05094600  
H -5.04120400 4.34636600 -1.29585200  
H -4.43805600 2.76469500 -1.83190700  
C -5.10746000 3.85076600 1.40565900  
H -6.14142000 3.49743800 1.47393400  
H -4.63145500 3.72188100 2.38010200  
H -5.12842400 4.91785400 1.16376100  
F 0.28569500 -1.66543200 3.14173100  
H -0.64980600 -1.60531000 2.77088600  
F -3.96653200 -0.97960700 2.41936700  
H -3.89747400 0.35130200 2.10434500  
F 0.95058700 0.42717100 2.15292200  
H 0.86228000 -0.46471200 2.55916300  
F 2.99849600 1.23750200 0.96731800  
H 2.35093100 0.84257700 1.55263500

IMI

C 8.32104600 2.37485400 -0.31242400  
C 7.38177000 1.51287600 -0.87625300  
C 6.19963700 1.20949100 -0.20185200  
C 5.97313600 1.78348900 1.05379500  
C 6.90782700 2.64340400 1.61962100  
C 8.08612600 2.94222900 0.93635300  
H 9.23605800 2.60335800 -0.85057000  
H 7.56712200 1.07230100 -1.85305100  
H 5.05037300 1.54320100 1.57859400  
H 6.71763200 3.08392200 2.59371300  
H 8.81619900 3.61455000 1.37611300  
C 5.17607900 0.25666500 -0.76869700  
H 4.17309000 0.65546100 -0.59701000  
H 5.30415600 0.14995700 -1.85075700  
C 5.26710800 -1.11490300 -0.09004700  
H 5.38564300 -0.99297900 0.99068100  
H 6.14462800 -1.67308900 -0.43608500  
C 4.05531400 -2.00313600 -0.24335000  
C 3.86645100 -3.01159500 0.37866700  
O 3.20337000 -1.52885100 -1.19742900  
C 1.87985300 -1.89517400 -1.26631000  
C 1.16123300 -2.49915900 -0.23374000  
C 1.24459500 -1.50980600 -2.44836100  
C -0.21393000 -2.66698400 -0.37682200  
H 1.65220400 -2.83167700 0.66852400  
C -0.12222500 -1.68692000 -2.58789400  
H 1.83653200 -1.04558100 -3.22956000

C -0.85233700 -2.25398000 -1.54288700  
H -0.79626800 -3.09006300 0.43431800  
H -0.64125900 -1.36734500 -3.48610900  
O -2.22253800 -2.34608500 -1.67172000  
I -3.29837100 -0.81537000 -0.90824100  
C -1.72708900 0.53847700 -1.00632200  
C -0.77274400 0.46649900 0.00502300  
C -1.60671600 1.36650600 -2.12178100  
C 0.38034900 1.23885300 -0.13972800  
H -0.89458800 -0.18895800 0.86209300  
C -0.46671100 2.15710800 -2.22025800  
H -2.37277300 1.38705300 -2.88987000  
C 0.52748900 2.07623700 -1.24255900  
H 1.17351000 1.14993100 0.59367700  
H -0.34417900 2.81587900 -3.07365900  
H 1.43070700 2.66895100 -1.34704400  
C -4.18682000 1.94833700 0.70463100  
O -4.01715500 1.48628200 1.90517600  
C -4.03169900 3.45197900 -0.57797700  
O -4.41703200 1.23028500 -0.28386000  
F 0.66806300 -3.13550500 2.72218500  
H -3.43036400 -1.32674500 2.06129100  
F -2.19282000 -1.61245300 1.97923700  
H -0.29369500 -3.48751700 2.64837800  
C -2.54354800 3.75566000 0.84265900  
H -1.89934800 3.26011900 1.01746100  
H -2.38336900 4.83555300 0.76178200  
H -2.24703800 3.43117800 1.84341000  
C -4.41569000 3.90036900 -0.83061000  
H -5.45495200 3.64803300 -1.05947900  
H -4.29503000 4.98487800 -0.91112100  
H -3.77673500 3.42374100 -1.57296100  
C -4.90361500 4.14654000 1.63244000  
H -5.96457500 3.92815500 1.47392100  
H -4.63023400 3.82838000 2.64842200  
H -4.76497000 5.22943200 1.55723800  
F -1.55523200 -3.73996000 2.45895900  
H -1.92412900 -2.73367600 2.26215900  
F -4.40685100 -0.97550800 2.01175300  
H -4.18172800 0.48447200 1.95791200  
F 0.78614200 -0.79028000 2.29179600  
H 0.70546100 -1.75709600 2.49800400  
F 2.93806500 -0.09424600 1.25397600  
H 2.16391100 -0.43496200 1.70684900

IM1g

C 8.99410100 0.49330200 -0.59329800  
C 7.79813000 -0.19730700 -0.78067600  
C 6.57283700 0.43506100 -0.57253500  
C 6.56115500 1.77411900 -0.16842300  
C 7.75312000 2.46542300 0.01885800  
C 8.97397400 1.82617000 -0.19363200  
H 9.94107200 -0.01040500 -0.76196900  
H 7.81571200 -1.23781600 -1.09625600  
H 5.60197300 2.26111800 -0.00608500  
H 7.73120300 3.50592300 0.32848000  
H 9.90465600 2.36607800 -0.04952000  
C 5.26474500 -0.29844200 -0.73457900  
H 4.54108200 0.35471100 -1.23024100  
H 5.39153700 -1.18902100 -1.35681500  
C 4.69024700 -0.70447700 0.63421300  
H 4.77251500 0.11682900 1.34848600  
H 5.24578400 -1.55911700 1.08323900  
C 3.23165100 -1.06247200 0.56624900  
O 2.37600700 -0.66557900 1.31421800  
O 2.97402700 -1.89996500 -0.47446300  
C 1.64451200 -2.14892700 -0.78920200  
C 0.76571100 -2.71515300 -1.02892400  
C 1.23679600 -1.80365300 -2.07186700  
C -0.56613400 -2.88467100 -0.23154100  
H 1.10312500 -2.96026200 1.12798900  
C -0.09491700 -1.97252800 -2.42877400  
H 1.95756900 -1.37222600 -2.75795000  
C -0.99350800 -2.48634900 -1.49606300  
H -1.27981300 -3.26881500 0.48620900  
H -0.45908700 -1.67052500 -3.40519700  
O -2.33362800 -2.51591600 -1.82624900  
I -3.42074300 -0.99068800 -1.08287500  
C -1.83494400 0.35396300 -1.16270500  
C -0.99358300 0.40897600 -0.05393100  
C -1.60335200 1.06531500 -2.33945600  
C 0.15254700 1.19470000 -0.15663400  
H -1.20168800 -0.15181200 0.85208700  
C -0.45611500 1.85127500 -2.40617900  
H -2.28645600 0.99808400 -3.17977400  
C 0.42681400 1.89895300 -1.32555600  
H 0.83019200 1.24387100 0.68255200  
H -0.24597000 2.41145500 -3.31155100  
H 1.34273300 2.47726700 -1.38094900  
C -4.36008800 1.74285000 0.49775900  
O -4.20249800 1.28922600 1.69981600  
C -4.24148400 3.24793400 0.35689600  
O -4.55008000 1.01510400 -0.49603900  
F 0.96382700 -2.14609300 3.22097700  
H -3.56600700 -1.46815400 1.93817200  
F -1.61171900 -2.49915900 1.89144200  
H 0.10583300 -2.66550800 3.10993600  
C -2.74064100 3.57023700 0.10717700  
H -2.14976700 3.10242000 -0.28455600  
H -2.60559800 4.65441100 0.44214200  
H -2.35859700 3.23084200 1.47741700

|      |             |             |             |      |             |             |              |      |             |             |             |
|------|-------------|-------------|-------------|------|-------------|-------------|--------------|------|-------------|-------------|-------------|
| C    | -4.72794400 | 3.68313700  | -1.02465900 | H    | 5.49081000  | -1.50340500 | 0.69879100   | H    | 1.53595600  | 0.55544600  | 1.52320000  |
| H    | -5.78036200 | 3.42577100  | -1.17581900 | C    | 3.59082700  | -1.43433400 | 1.54807200   | C    | -0.06132500 | 3.70572700  | -0.22283300 |
| H    | -4.61898300 | 4.76754400  | -1.12078300 | O    | 3.44985000  | -1.81420000 | 2.65828400   | H    | -0.09363900 | 3.06805000  | -1.11872100 |
| H    | -4.14290700 | 3.20306200  | -1.81362100 | O    | 2.66540700  | -1.89987000 | 0.51468400   | H    | 0.62501300  | 4.53736400  | -0.42292900 |
| C    | -5.04270900 | 3.93874900  | 1.46696000  | C    | 1.40741700  | -2.11130600 | 0.72648800   | H    | 0.31908500  | 3.11255800  | 0.60854200  |
| H    | -6.10820500 | 3.69830100  | 1.39397900  | C    | 0.71586700  | -1.80524000 | 1.95693700   | C    | -2.03240000 | 4.97654900  | -1.13777500 |
| H    | -4.68694900 | 3.63931100  | 2.45502200  | C    | 0.73276400  | -2.69949400 | -0.41266000  | H    | -3.02765200 | 5.38188100  | -0.92758600 |
| H    | -4.93139000 | 5.02282900  | 1.36851800  | C    | -0.59007500 | -2.12821600 | 2.04616200   | H    | -1.37487700 | 5.80609600  | -1.41846400 |
| F    | -1.05546000 | -3.27202400 | 2.81714200  | H    | 1.21260400  | -1.25257600 | 2.74131200   | H    | -2.11969000 | 4.29002100  | -1.98272400 |
| H    | -1.69250400 | -2.50498400 | 2.43630300  | C    | -0.56457300 | -3.03963500 | -0.32389000  | C    | -1.39600800 | 5.20115100  | 1.28881400  |
| F    | -4.56273500 | -1.16852800 | 1.84008300  | H    | 1.32379400  | -2.84058400 | -1.31029200  | H    | -2.39258200 | 5.55715600  | 1.56963400  |
| H    | -4.34862700 | 0.28177300  | 1.76050200  | C    | -1.30300400 | -2.84496600 | 0.95218200   | H    | -0.95519600 | 4.70339200  | 2.15510800  |
| F    | 0.40266300  | 0.17743700  | 2.79868100  | H    | -1.18011500 | -1.85537000 | 2.91405300   | H    | -0.78223300 | 6.07195200  | 1.03412700  |
| H    | 0.69545700  | -0.75675900 | 2.89172500  | H    | -1.11156100 | -3.50179800 | -1.13949300  | F    | 0.40621900  | 1.12310500  | 1.76794900  |
| F    | 2.24472200  | 1.78984100  | 2.43968500  | C    | -2.42697000 | -3.27697600 | 1.10000700   | H    | -0.15025900 | 0.63878800  | 2.68428100  |
| H    | 1.63311900  | 1.05155400  | 2.58501300  | I    | -4.03597400 | -1.33120200 | -1.37591500  | F    | -2.78143200 | 0.12182300  | 2.30203600  |
| F    | 3.17786800  | 1.77988900  | 0.09764100  | C    | -2.08460800 | -0.58792500 | -1.26551400  | H    | -2.70671800 | 1.78341100  | 1.76232100  |
| H    | 2.88069800  | 1.72941600  | 1.00711000  | C    | -1.62996600 | -0.06602900 | -0.05147100  |      |             |             |             |
|      |             |             |             | C    | -1.27049500 | -0.58174400 | -2.40659700  | IM2e |             |             |             |
| IM2b |             |             |             | C    | -0.34199200 | 0.46039100  | 0.01894700   | C    | 7.74431600  | 2.45718000  | -0.86993700 |
| C    | 7.48913800  | 0.82245600  | -1.98726500 | H    | -2.27225100 | -0.05337300 | 0.82428100   | C    | 6.88019100  | 1.41630200  | -1.20512700 |
| C    | 6.69440600  | -0.05339900 | -1.24871700 | C    | 0.01536500  | -0.06560200 | -2.31230800  | C    | 5.76897600  | 1.13684200  | -0.41165700 |
| C    | 5.47576900  | 0.37140500  | -0.72388900 | H    | -1.64405300 | -0.97172900 | -3.34754300  | C    | 5.53283800  | 1.91170900  | 0.72810400  |
| C    | 5.05693800  | 1.68829900  | -0.94398500 | C    | 0.48936200  | 0.44095600  | -1.09520000  | C    | 6.39352400  | 2.95053600  | 1.06464200  |
| C    | 5.84883400  | 2.56193800  | -1.68007600 | H    | 0.02105200  | 0.83703800  | 0.96525500   | C    | 7.50235200  | 3.22547600  | 0.26475700  |
| C    | 7.06776100  | 2.13046800  | -2.20393300 | H    | 0.65245500  | -0.05791600 | -3.19193400  | H    | 8.60494200  | 2.66810600  | -1.49707600 |
| H    | 8.43616500  | 0.48066200  | -2.39357100 | H    | 1.49708300  | 0.83430100  | -0.101085300 | H    | 7.06902200  | 0.81891200  | -2.09395700 |
| H    | 7.02390100  | -1.07634700 | -1.08238700 | C    | -3.26908900 | 2.39966100  | 1.06214700   | H    | 4.66316600  | 1.68699600  | 1.34290200  |
| H    | 4.10264700  | 2.00463500  | -0.52630500 | O    | -2.08798200 | 2.61121200  | 1.64627100   | H    | 6.19806800  | 3.54946100  | 1.94859200  |
| H    | 5.51417900  | 3.58062400  | -1.85004700 | C    | -3.59764000 | 3.45408800  | 0.01020600   | H    | 8.17328800  | 4.03777000  | 0.52545700  |
| H    | 7.68473900  | 2.81253500  | -2.78049900 | O    | -3.96852400 | 1.44085700  | 1.31027700   | C    | 4.83199400  | -0.00322700 | -0.72828500 |
| C    | 4.59328500  | -0.53762300 | 0.09704100  | H    | -0.20490700 | 0.65448300  | 3.14471600   | H    | 3.80059000  | 0.32092900  | -0.56944500 |
| H    | 3.56179900  | -0.42732800 | -0.24411600 | F    | 1.03771400  | 0.79066000  | 3.33399300   | H    | 4.93328600  | -0.30805200 | -1.77498200 |
| H    | 4.88731500  | -1.58488600 | -0.02969900 | C    | -2.62753200 | 3.23569300  | -1.16209500  | C    | 5.10682600  | -1.19351100 | 0.19730400  |
| C    | 4.63904600  | -0.14689800 | 1.57944500  | H    | -2.75656500 | 2.23642400  | -1.59461800  | H    | 5.23317700  | -0.85061300 | 1.22829500  |
| H    | 4.69005200  | 0.93970500  | 1.68318200  | H    | -2.82662000 | 3.97558200  | -1.94517500  | H    | 6.03160600  | -1.71367700 | -0.07849400 |
| H    | 5.51991000  | -0.56264300 | 2.08298200  | H    | -1.58828300 | 3.33875900  | -0.83661700  | C    | 4.02466200  | -2.22560500 | 0.28015400  |
| C    | 3.44222200  | -0.52789900 | 2.39266200  | C    | -5.03899100 | 3.26101800  | -0.45440100  | O    | 3.94017200  | -3.17442900 | 0.98300500  |
| C    | 3.15406200  | -0.24193300 | 3.50301500  | H    | -5.73957000 | 3.39087500  | 0.37563500   | O    | 3.03480300  | -2.03427700 | -0.76021500 |
| O    | 2.63332700  | -1.53991600 | 1.71001300  | H    | -5.27915600 | 3.99357100  | -1.23226400  | C    | 1.78138500  | -2.35414200 | -0.61733500 |
| C    | 1.34114500  | -1.56980400 | 1.78556500  | H    | -5.18418500 | 2.25500400  | -0.85712200  | C    | 1.16378700  | -2.63718300 | 0.65171000  |
| C    | 0.54888200  | -0.20030500 | 2.32664100  | C    | -3.39733500 | 4.85743300  | 0.59659600   | C    | 1.05116700  | -2.39659300 | -1.85837200 |
| C    | 0.75328400  | -2.77622800 | 1.23519700  | H    | -4.06203400 | 5.02602100  | 1.45031200   | C    | -0.13180500 | -3.01840500 | 0.65604500  |
| C    | -0.79459100 | -0.60431100 | 2.25348400  | H    | -2.36698000 | 4.99973300  | 0.93050900   | H    | 1.72550900  | -2.53057000 | 1.56839200  |
| H    | 1.02878200  | 0.40891000  | 2.64472900  | H    | -3.62707200 | 5.60943200  | -0.16607300  | C    | -0.24674600 | -2.76316700 | -1.86098900 |
| C    | -0.58301300 | -2.91792200 | 1.22054800  | H    | 1.73028300  | 0.71932100  | 2.32321600   | H    | 1.59551000  | -2.13447400 | -2.75818300 |
| H    | 1.43696000  | -3.51980200 | 0.84184000  | F    | -1.20878200 | 0.47856800  | 2.91714000   | C    | -0.91496600 | -3.14727300 | -0.59761900 |
| C    | -1.45328400 | -1.85333200 | 1.78521100  | H    | -1.87728300 | 1.84347800  | 2.23699000   | H    | -0.65471900 | -3.23588600 | -1.57695000 |
| H    | -1.45054300 | 0.22369600  | 2.50246000  | F    | 2.25885800  | 0.51209000  | 1.42459400   | H    | -0.83331800 | -2.84103400 | -2.77011900 |
| H    | -1.07848400 | -3.80564400 | 0.84165100  |      |             |             |              | C    | -2.05639100 | -3.57131300 | -0.59104000 |
| O    | -2.65243200 | -2.01734800 | 1.88889600  | IM2d |             |             |              | I    | -3.75318700 | -0.87821700 | -0.73230400 |
| I    | -3.64204000 | -1.34267600 | -1.17137700 | C    | 7.62325400  | 0.80234800  | -1.58721100  | C    | -1.83267100 | -0.23988300 | -1.20236300 |
| C    | -1.56070100 | -1.45331100 | -1.36353800 | C    | 6.66778900  | -0.20303100 | -1.44615700  | C    | -0.90410900 | -0.01948200 | -0.18153500 |
| C    | -0.76422800 | -0.41518200 | -0.88113000 | C    | 5.48821000  | 0.03718200  | -0.74436800  | C    | -1.50635500 | 0.03517900  | -2.54402400 |
| C    | -0.99308600 | -2.56193000 | -2.01028800 | C    | 5.27464100  | 1.29899900  | -0.17986000  | C    | 0.35836300  | 0.47168100  | -0.51153400 |
| C    | 0.61828900  | -0.48422100 | -1.06079200 | C    | 6.22636100  | 2.30270300  | -0.31922300  | H    | -1.15806900 | -0.22207800 | 0.85283800  |
| H    | -1.18966300 | 0.43301600  | -0.35351200 | C    | 7.40411100  | 2.05582200  | -1.02435000  | C    | -0.25177800 | 0.54144400  | -2.85270400 |
| C    | 0.38338600  | -2.61324000 | -2.18482800 | H    | 8.53742900  | 0.60515400  | -2.13852800  | H    | -2.24522900 | -0.12541500 | -3.32266600 |
| H    | -1.62794000 | -3.35875700 | -2.38371400 | H    | 6.83943200  | -1.18115700 | -1.88929200  | C    | 0.68551100  | 0.75281400  | -1.83675000 |
| C    | 1.19052900  | -1.57496400 | -1.71027600 | H    | 4.35015700  | 1.47606700  | 0.36664300   | H    | 1.08386200  | 0.62300400  | -0.28264400 |
| H    | 1.23548500  | 0.30919200  | -0.65260600 | H    | 6.04877800  | 3.28011300  | -0.11844200  | H    | -0.00501700 | 0.77273100  | -3.88431000 |
| H    | 0.82624200  | -3.46251800 | -2.69625400 | H    | 8.14660000  | 2.83971600  | -1.13533500  | H    | 1.66539500  | 1.15449600  | -2.07842600 |
| H    | 2.26610900  | -1.61539200 | -1.85792400 | C    | 4.44217600  | -1.03309000 | -0.54613400  | C    | -3.82250600 | 2.58147700  | 0.61237500  |
| C    | -2.83555900 | 2.50486100  | 0.52264200  | H    | 3.45271400  | -0.59916900 | -0.70827200  | O    | -3.00904600 | 1.88795600  | 1.41834300  |
| O    | -1.78178000 | 3.08431700  | 0.09959800  | H    | 4.57751300  | -1.84669000 | -1.26614800  | C    | -3.13455500 | 3.79851000  | 0.00189200  |
| C    | -4.15564000 | 3.06008000  | 0.12705100  | C    | 4.49744900  | -1.57828700 | 0.88613500   | O    | -4.97805700 | 2.28030800  | 0.42175800  |
| O    | -2.76207300 | 1.35785300  | 1.14178900  | H    | 4.65030500  | -0.76088000 | 1.59635700   | H    | -3.34941900 | -0.84566200 | 2.53505600  |
| F    | 2.38354600  | 1.11559900  | 0.94788400  | H    | 5.33185900  | -2.27618700 | 1.02166900   | F    | -2.15026900 | -1.71616400 | 2.19935800  |
| H    | 1.34694900  | 1.56310900  | 0.92315700  | C    | 3.26040200  | -2.26377900 | 1.37920700   | C    | -1.77807400 | 3.39524500  | -0.58856100 |
| C    | -4.23035700 | 3.08429200  | -1.40764200 | O    | 3.00615900  | -2.67346200 | 2.46032900   | H    | -1.89565700 | 2.63929000  | -1.37409900 |
| H    | -4.19287500 | 2.06863000  | -1.81732100 | O    | 2.34112500  | -2.54078300 | 0.29307400   | H    | -1.29633800 | 4.27360700  | -1.03274700 |
| H    | -5.17315100 | 3.54466100  | -1.72251800 | C    | 1.04987600  | -2.57475900 | 0.44816900   | H    | -1.12035400 | 2.98655700  | 0.18239200  |
| H    | -3.40140300 | 3.65872400  | -1.82866800 | C    | 0.36265600  | -2.05347700 | 1.59972400   | H    | -4.03892400 | 4.38723200  | -0.18777500 |
| C    | -5.31501000 | 2.25098300  | 0.70351300  | C    | 0.35244000  | -3.17592800 | -0.66178500  | H    | -5.01407400 | 4.65616300  | -0.66596400 |
| H    | -5.26091700 | 2.21093500  | 1.79499400  | C    | -0.97899400 | -2.20143400 | 1.65527700   | H    | -3.57449400 | 5.28228900  | -1.50613700 |
| H    | -6.26678400 | 2.70987900  | 0.41561500  | H    | 0.90599400  | -1.53154100 | 2.37382400   | H    | -4.20783000 | 3.66372300  | -1.88228300 |
| H    | -5.29301300 | 1.22182500  | 0.33418100  | C    | -0.98541600 | -3.33456800 | -0.60778000  | C    | -2.91961700 | 4.81858700  | 1.13205000  |
| C    | -4.18082600 | 4.49703100  | 0.66680400  | H    | 0.95442700  | -3.49597900 | -1.50439700  | H    | -3.87534100 | 5.11849600  | 1.57412200  |
| H    | -4.11339000 | 4.50773400  | 1.75989100  | C    | -1.73419900 | -2.91085700 | 0.59445200   | H    | -2.28843200 | 4.39880200  | 1.91997300  |
| H    | -3.34887900 | 5.07941300  | 0.26393100  | H    | -1.56023600 | -1.79752700 | 2.47370700   | H    | -2.43165900 | 5.17422300  | 0.73226400  |
| H    | -5.12081500 | 4.98095400  | 0.38027600  | H    | -1.55294200 | -3.81383200 | -1.39819400  | F    | -0.15759100 | -1.87041400 | 3.33409     |

C 4.91536300 -0.33333000 -0.06097900  
H 3.96565800 -0.16478400 -0.57305100  
H 5.46460200 -1.09627900 -0.62211300  
C 4.61754400 -0.83184900 1.35687800  
H 4.31621800 0.00541600 1.99363000  
H 5.49945600 -1.28272300 1.82522500  
C 3.49768000 -1.81594000 1.49633500  
O 3.07416200 -2.34869300 2.46166600  
O 2.96765900 -2.21616700 0.19063200  
C 1.72828100 -2.51872300 -0.01118000  
C 0.67535400 -2.31519300 0.95400300  
C 1.49159800 -3.12081900 -1.30982000  
C -0.54304700 -2.83074800 0.68653200  
H 0.86254500 -1.78780100 1.87888300  
C 0.27972600 -3.62256100 -1.59437100  
H 2.33196000 -3.16001500 -1.99280700  
C -0.80744900 -3.58650100 -0.57485600  
H -1.36923200 -2.73544800 1.38722700  
H 0.05399400 -4.12119900 -2.53083100  
O -1.84629900 -4.18076300 -0.75532800  
I -2.77490700 -0.55060600 -0.68801800  
H -1.02425300 -0.62467200 -1.83890800  
C 0.13344500 -0.02901700 -1.34096500  
C -1.01863200 -1.23206900 -3.09840400  
C 1.29677200 -0.03180200 -2.11037900  
H 0.12702300 0.42555100 -0.35761600  
C 0.14741800 -1.21460000 -3.86813500  
H -1.92482800 -1.68876600 -3.48497100  
C 1.30365000 -0.61333500 -3.38003800  
H 2.18309400 0.45634500 -1.71610500  
H 0.14022100 -1.66629400 -4.85565800  
H 2.20407400 -0.58999900 -3.98610600  
C -3.81017400 2.91722800 -0.16871500  
O -3.87728900 2.30803900 1.02312800  
C -2.69059400 3.94893200 -0.23213600  
O -4.53146700 2.62807100 -1.09459000  
F -0.43899600 -0.82845300 3.22514600  
H -4.91166100 -0.37205000 1.85982900  
F -4.45410000 -0.70582500 3.20247900  
H -1.52937000 -1.37582900 3.11333400  
C -1.37587300 3.16028800 -0.36852700  
H -1.38747500 2.54756600 -1.27803300  
H -0.53572900 3.86071800 -0.43952400  
H -1.21177200 2.50458000 0.49243700  
C -2.90222200 4.83393600 -1.45913700  
H -3.84182200 5.38971500 -1.38339300  
H -2.07986500 5.55205400 -1.54573000  
H -2.94510200 4.23084200 -2.36906300  
C -2.66050600 4.79212400 1.04722300  
H -3.60155900 5.33536000 1.18301500  
H -2.49568800 4.16612300 1.92681100  
H -1.85045900 5.52679000 0.98234300  
F -2.42247100 -1.92652500 2.92872100  
H -3.60996500 -1.21559700 3.12610500  
F -5.11903700 -0.09961900 0.94614400  
H -4.51711800 1.56654600 0.94451200  
F 0.06902000 0.87623900 1.80280600  
H -0.23892200 0.10602300 2.50052800  
F 2.13861900 0.20639700 0.91197000  
H 1.29948600 0.55477600 1.33650900

IM2g

C 7.77817700 2.69695000 -0.88612500  
C 7.11216100 1.74717100 -0.11344500  
C 5.73600100 1.57037400 -0.24397800  
C 5.02978900 2.35931000 -1.15730700  
C 5.69211600 3.30740700 -1.92887100  
C 7.06965700 3.47771500 -1.79433300  
H 8.85083800 2.82447000 -0.77892000  
H 7.66787100 1.13541300 0.59322400  
H 3.95502100 2.21628100 -1.25291400  
H 5.13536200 3.91129800 -2.63842100  
H 7.58798900 4.21594400 -2.39783200  
C 4.97732500 0.57166000 0.59600600  
H 4.24808400 0.05542800 -0.03144900  
H 5.65485700 -0.18104000 1.01196400  
C 4.21922500 1.28153100 1.72183900  
H 3.73455700 2.18390900 1.33714000  
H 4.88941300 1.60138700 2.52755900  
C 3.10464800 0.51220400 2.36005500  
O 2.36867600 0.82416300 3.22918900  
O 3.05082900 -0.86754600 1.86508100  
C 1.95173700 -1.53638400 1.74968600  
C 0.63787100 -0.95605400 1.86335300  
C 2.16376000 -2.95404300 1.51892200  
C -0.42944600 -1.78301700 1.87419600  
H 0.50873500 0.11351100 1.94504200  
C 1.11142400 -3.78617000 1.51864400  
H 3.18732600 -3.28179100 1.38040400  
C -0.26352700 -3.26433500 1.76859900  
H -1.44518600 -1.40794800 1.97660300  
H 1.20917400 -4.85903400 1.39213800  
O -1.19677400 -4.02237300 1.90884600  
I -1.89448200 -1.95091500 -1.21415400  
C 0.10463600 -2.55751700 -1.38887600  
C 1.09829000 -1.57953900 -1.37596600  
C 0.44128900 -3.90677000 -1.52322300  
C 2.43453200 -1.95665900 -1.51260200  
H 0.83210300 -0.53662400 -1.25525200  
C 1.78184100 -4.27059000 -1.67573100  
H -0.33712500 -4.66381900 -1.53246600

C 2.77883700 -3.29977800 -1.67458500  
H 3.19880900 -1.18508600 -1.52623900  
H 2.03793500 -5.31812700 -1.80386100  
H 3.81805800 -3.58481800 -1.80579300  
C -4.03698100 2.55341600 -0.59453200  
O -3.08035900 1.61068800 -0.57613500  
C -3.54112500 3.89796600 -0.08443000  
O -5.16319600 2.31584500 -0.96709400  
F -1.16829200 1.20075000 1.40068000  
H -5.24585800 -0.36403500 -0.91913800  
F -6.33037900 -0.06232600 0.02276300  
H -2.21025500 0.55731000 1.41575300  
C -2.23600100 4.26495500 -0.80460600  
H -2.39532600 4.35740500 -1.88438500  
H -1.87429600 5.22943200 -0.43145500  
H -1.46486700 3.50907800 -0.63756300  
C -4.61787100 4.94981100 -0.34133200  
H -5.55139700 4.67920700 0.15825000  
H -4.28284500 5.92163800 0.36229900  
H -4.82758700 5.04378100 -1.41087800  
C -3.27605300 3.76237500 1.42459300  
H -4.18797900 3.47837500 1.95657400  
H -2.50754300 3.00926500 1.61698600  
H -2.92654000 4.72414000 1.81612400  
F -3.04144800 -0.10604100 1.53766600  
H -5.91374200 0.56638300 0.63885800  
F -4.42366300 -0.57031300 -1.40448200  
H -3.48645900 0.78761400 -0.93329900  
F -0.11015200 1.44987500 -0.60962200  
H -0.71073600 1.34793300 0.27198700  
F 2.05501500 0.89365300 0.11651400  
H 1.15793900 1.21713700 -0.20146800  
F -5.03357600 1.18787800 1.67068900  
H -4.19361600 0.65504900 1.65400600

TSa

C -7.25234500 -0.92293900 1.76447800  
C -6.11857400 -1.43743500 1.14011400  
C -5.06734000 -0.59967700 0.76412300  
C -5.17476200 0.76959900 1.02300500  
C -6.30555700 1.28816500 1.64639300  
C -7.34838000 0.44235000 2.01913700  
H -8.05935500 -1.58913500 2.05410100  
H -6.04469000 -2.50494900 0.94482900  
H -4.35863600 1.42841100 0.73413400  
H -6.37174900 2.35348600 1.84511900  
H -8.22984100 0.84563200 2.50771100  
C -3.85648200 -1.14077300 0.04445900  
H -2.95874700 -0.58990000 0.33577300  
C -3.70453500 -2.19460200 0.29938700  
C -4.01938100 -0.98926200 -1.47016100  
H -4.23605800 0.05301800 -1.72338900  
H -4.86217000 -1.58501300 -1.84154100  
C -2.81274400 -1.34319400 -2.29716500  
O -2.67561300 -1.14934200 -3.46707800  
O -1.85795800 -2.03783500 -1.55200300  
C -0.54070500 -1.85831900 -1.72625500  
C 0.02559000 -0.91331400 -2.61729800  
C 0.26595800 -2.64739100 -0.88235700  
H 1.37428700 -0.69978700 -2.56154200  
H -0.60945200 -0.32994200 -3.26561800  
C 1.61995500 -2.42835900 -0.82861100  
H -0.22240100 -3.37502100 -0.24407800  
C 2.21125500 -1.43805500 -1.67098900  
H 1.84113200 0.06750000 -3.17113900  
H 2.26506100 -2.99184700 -0.16161200  
C 3.47253600 -1.16325500 -1.58317500  
I 3.73310800 0.60184000 -0.06505500  
C 3.21284800 -0.74219700 1.42251300  
C 1.88001000 -0.85639700 1.81083500  
C 4.21813500 -1.57354400 1.92779200  
C 1.55545100 -1.84444000 2.74271600  
H 1.12941700 -0.19917800 1.37860100  
H 3.86645200 -2.55179300 2.84832300  
H 5.24711600 -1.46126400 1.60364200  
C 2.53644000 -2.68502800 3.25664300  
H 0.52320700 -1.95057300 3.06041400  
H 4.63124900 -3.20763900 3.25100200  
C 2.27110400 -3.44831700 3.98132100  
C 0.76311800 2.12677300 0.39373200  
O 0.36172400 0.99208600 -0.07000800  
C -0.01832900 3.38324000 -0.03101100  
O 1.74786500 2.23068600 1.14296100  
C -1.43069600 3.29963500 0.56951200  
H -1.38736400 3.25031300 1.66303700  
H -2.00397100 4.19148900 0.29174300  
H -1.95530300 2.41974400 0.19036500  
C 0.69229900 4.63679800 0.47346900  
C -0.76437100 4.71051200 0.05614200  
O 0.12805900 5.52917500 0.18031600  
H 0.78708000 4.461973700 1.56202200  
C -0.11468100 3.40285800 -1.56370200  
H 0.88335200 3.40461700 -2.01888200  
H -0.66875200 2.53473800 -1.92715700  
F -0.63532700 4.30912900 -1.89268200  
F -1.72316700 0.65824100 -1.16798500  
H -0.80508100 0.84442300 -0.68825200

TS1b

C -7.36268800 0.88340800 1.65459400  
C -6.15047800 0.27008800 1.35312300

C -5.42735700 0.63130400 0.21321700  
C -5.94825000 1.62193500 -0.62168600  
C -7.16102200 2.23896600 -0.32511300  
C -7.87181200 1.87112500 0.81430100  
H -7.90896500 0.59334300 2.54703600  
H -5.75327900 -0.49868700 2.01287500  
H -5.39254300 1.91295200 -1.50971800  
H -7.54923900 3.01017700 -0.98335600  
H -8.81600200 2.35287600 1.04803300  
C -4.13640500 -0.06832200 -0.13261200  
H -3.49576800 0.56042100 -0.75447600  
H -3.57243000 -0.29826400 0.77797500  
C -4.41820200 -1.38233000 -0.88117400  
H -4.96639900 -1.19614600 -1.80713300  
H -5.03703600 -2.03390600 -0.25049600  
C -3.18003400 -2.15383800 -1.24994400  
O -2.90885300 -2.60409100 -3.32284700  
C -2.42035100 -2.38703000 -0.011478600  
C -1.09539400 -2.65508600 -0.15033900  
C -0.29206600 -2.58978000 -1.30617100  
C -0.53400400 -2.91711500 1.11136600  
C 1.06922800 -2.70881700 -1.16368600  
H -0.72413100 -2.36188600 -2.26716700  
C 0.83414600 -3.00606300 1.25122800  
H -1.19695500 -2.96400700 1.96792700  
C 1.66059800 -2.91834000 0.10617000  
H 1.71612900 -2.56286000 -0.20208100  
H 1.30003100 -3.13853100 2.22419000  
O 2.97586600 -2.93754100 0.23803000  
I 3.78438200 -0.087251700 0.07807400  
C 2.21305500 -0.13510900 1.18135000  
C 1.01717600 0.09731500 0.50601300  
C 2.34246500 -0.00803700 2.57019100  
C -0.09786100 0.47258600 1.25563300  
H 0.94302900 -0.01256500 -0.57262600  
C 1.22175900 0.38202500 3.29099800  
H 3.28734300 -0.20365800 3.06571400  
C 0.00797300 0.61841000 2.63462200  
H -1.02705700 0.63189300 0.71857500  
H 1.29316500 0.49865000 4.36740900  
H -0.85942000 0.92056000 3.21346100  
C 2.33673500 2.44618800 -1.13119700  
O 1.14763000 2.33544300 -1.66285000  
C 2.52518100 3.73948800 -0.33972800  
O 3.21487400 1.59325000 -1.21978100  
F -1.45583500 -0.08983600 -1.31531100  
H -0.58757100 0.01740800 -1.89021100  
C 1.57669100 3.68164500 0.86889500  
H 1.82491800 2.83798900 1.52493900  
H 1.66714100 4.60389700 1.45353100  
H 0.53899800 3.57037600 0.54295800  
C 3.97240000 3.84456900 0.13535100  
H 4.66513800 3.84985700 -0.71091800  
H 4.11159100 4.76745700 0.70817800  
H 4.23370000 2.99575000 0.77515700  
C 2.15807600 4.93513200 -1.22772700  
H 2.81359800 4.98949500 -2.10322500  
H 1.12586200 4.85566200 -1.57593700  
H 2.26955100 5.86578800 -0.66074200  
F 0.55772800 0.10527000 -2.42963700  
H 0.97453400 1.39212400 -2.08490200

TS1c

C 7.07814100 2.11582600 -0.95299100  
C 6.38078500 0.92506200 -1.15186700  
C 5.18311600 0.68449800 -0.48106400  
C 4.68979700 1.65467000 0.39850800  
C 5.38366200 2.84281200 0.59817200  
C 6.58081000 3.07670900 -0.07832400  
H 8.00953700 2.29133400 -1.48270300  
H 6.77019400 0.17614500 -1.83744000  
H 3.75577300 1.45754000 0.92214300  
H 4.99009100 3.58970100 1.28085900  
H 7.12203900 4.00482000 0.07667700  
C 4.41095600 -0.60046300 -0.65724700  
H 3.35294000 -0.36707600 -0.79891300  
H 4.74997200 -1.13700000 -1.54963600  
C 4.53924200 -1.49423800 0.58045400  
H 4.46398200 -0.88582600 1.48681600  
H 5.51106200 -1.99817700 0.61989100  
C 3.46868600 -2.53685000 0.75562700  
O 3.34160300 -3.27124000 1.68713600  
O 2.61221200 -2.60872500 0.34706200  
C 1.29749200 -2.83643900 -0.20754800  
C 0.61892500 -2.75870900 1.02862900  
C 0.60539600 -3.04097600 -1.42237600  
C -0.74979000 -2.80107300 1.02487000  
H 1.15272100 -2.56030500 1.94447600  
C -0.76437100 -3.09666100 -1.42087700  
H 1.18393400 -3.09623000 -2.33754600  
C -1.48204700 -3.00555700 -0.18751200  
H -1.31083500 -2.60976300 1.93462700  
H -1.33340300 -3.22244900 -2.33625800  
O -2.77021300 -3.04950700 -0.17365500  
I -3.68226800 -0.86453300 -0.08947200  
C -2.01828400 -0.21198900 -1.10585200  
C -0.83602100 0.01944400 -0.40236900  
C -2.07543000 -0.12727700 -2.50768400  
C 0.31383000 0.34642900 -1.12081600  
H -0.80626900 -0.06233900 0.67606600  
C -0.92065300 0.20931200 -3.20083600

H -3.00519200 -0.31645900 -3.03353000  
C 0.27114700 0.44313000 -2.50762900  
H 1.22943700 0.51164100 -0.56380800  
H -0.94956100 0.28590000 -4.28286900  
H 1.17016600 0.70472000 -3.05734400  
C -2.67575900 2.61440900 0.81371200  
O -1.75239500 2.21715200 1.67114300  
C -2.32754300 3.93650300 0.14033200  
O -3.67795900 1.97246900 0.54309800  
F 2.04046700 -0.33413800 1.22177200  
H -0.74806900 -0.36790400 2.69931000  
F 0.39843600 -0.56838800 2.86445300  
H 1.32848400 -0.36735000 1.95080100  
C -1.19259300 3.62763900 -0.85252000  
H -1.50546400 2.37190500 -1.58370800  
H -0.92235400 4.53938400 -1.39618500  
H -0.30696500 3.25546800 -0.32964900  
C -3.55085000 4.46323100 -0.60724000  
H -4.37990300 4.65221000 0.08100600  
H -3.29895700 5.40062800 -1.11377300  
H -3.89394500 3.74132700 -1.35253800  
C -1.84691800 4.95448000 1.18062500  
H -2.63369000 5.17203700 1.91030800  
H -0.97259400 4.58293000 1.71919700  
H -1.58006600 5.89111700 0.67975200  
F -1.81254400 -0.22180500 2.44981600  
H -1.93647100 1.29656400 2.02424500

**TS1d**

C 7.99097000 1.47747500 -1.13541300  
C 7.06952700 0.43398800 -1.20958900  
C 5.83362600 0.53268800 -0.57258300  
C 5.53186100 1.69453400 0.14592700  
C 6.44895500 2.73656100 0.22203200  
C 7.68262900 2.63033700 0.41990400  
H 8.94928300 1.38868600 -1.63812500  
H 7.31196400 -0.46533800 -1.77086500  
H 4.56540800 1.76258400 0.64184100  
H 6.20172600 3.63456800 0.77998400  
H 8.39886000 3.44399000 -0.36235700  
C 4.82210200 -0.58680900 -0.60577800  
H 3.82780700 -0.16828700 -0.77809800  
H 5.03780200 -1.28009300 -1.42548200  
C 4.79823700 -1.33703300 0.73011800  
H 4.82414800 -0.62274500 1.55865200  
H 5.67620100 -1.98196200 0.84719700  
C 3.57494400 -2.17255700 0.99884400  
C 3.33055200 -2.75632400 2.01195900  
O 2.74053300 -2.24143100 -0.10969300  
C 1.42195300 -2.50190700 0.00581200  
C 0.67474100 -2.26732800 1.17575800  
C 0.80549700 -2.92604100 -1.18996600  
C -0.68583400 -2.46892400 1.13352400  
H 1.14126100 -1.87728200 2.06880900  
C -0.55474100 -3.10950000 -1.23164100  
H 1.43149500 -3.07160200 -2.06316100  
C -1.32917600 -2.92359700 -0.05333800  
H -1.30707900 -2.21427300 1.98496400  
H -1.06179400 -3.41698300 -2.14049200  
O -2.61824800 -3.11749800 -0.07823700  
I -3.78810700 -1.16205900 -0.37718400  
C -2.11999500 -0.34421400 -1.24295800  
C -1.09152300 0.09767400 0.40812300  
C -1.98299400 -0.40188100 -2.63753700  
C 0.12229500 0.45698600 -0.99371300  
H -1.21519100 0.14365100 0.66728700  
C -0.77784100 -0.00634700 -3.19873100  
H -2.80214700 -0.74837700 -3.25836700  
C 0.27562500 0.40320800 -2.37518600  
H 0.94393000 0.75297500 -0.35440500  
H -0.65291100 -0.03531700 -4.27611100  
H 1.22484300 0.68686000 -2.81904500  
C -3.35565400 2.44058100 0.50049300  
O -2.73995700 2.12318200 1.62733900  
C -2.92189300 3.79898900 -0.03206300  
O -4.14548600 1.70657700 -0.07286600  
F 2.51891600 0.23436500 1.14210600  
H -1.68840100 -0.28339900 2.82336600  
F -0.47738600 -0.26985300 3.12731200  
H 1.74336500 0.72138000 1.51253100  
C -1.47653300 3.62425900 -0.53437200  
H -1.44175900 2.92766000 -1.38009400  
H -1.09022400 4.59145000 -0.87366900  
H -0.82673500 3.23971800 0.25839800  
C -3.83760000 4.21375200 -1.18118400  
H -4.87182100 4.32194100 -0.84098200  
H -3.50443200 5.17294200 -1.59036200  
H -3.82391200 3.46748400 -1.97965700  
C -2.95721600 4.83822400 1.09547500  
H -3.96819500 4.94532100 1.50224200  
H -2.28529800 4.55730400 1.90912900  
H -2.64475100 5.81105800 0.70191900  
F 0.53058900 1.32918400 1.85995400  
H 0.04611600 0.61358500 2.51460100  
F -2.65575100 -0.33057500 2.41716800  
H -2.92811600 1.18881000 1.90879200

**TS1e**

C 8.09472800 2.23420400 -0.70944100  
C 7.17049000 1.27297500 -1.11519300  
C 6.01109200 1.04682100 -0.37491500

C 5.78987700 1.79689000 0.78463200  
C 6.71003200 2.75637400 1.19222300  
H 7.86616900 2.97763200 0.44442300  
H 8.99239500 2.40239400 -1.29653500  
H 7.34995300 0.69466600 -2.01848600  
H 4.88360500 1.61429200 1.35914900  
H 6.52511200 3.33515200 2.09195000  
H 8.58422400 3.72773300 0.76061200  
C 5.00645600 -0.00836800 -0.76776600  
H 3.99578500 0.38333700 -0.62925300  
H 5.11804700 -0.27484700 -1.82388000  
C 5.16029200 -1.25529900 0.10981200  
H 5.27438500 -0.96484900 1.15853200  
H 6.05871000 -1.82435700 -0.15505300  
C 3.99651500 -2.20863500 0.10829900  
O 3.86012800 -3.16481000 0.80877300  
O 3.06940100 -1.88990600 -0.88554900  
C 1.77730100 -2.24100200 -0.80074500  
C 1.12175200 -2.57685600 0.40456600  
C 1.07801800 -2.16642700 -0.202914000  
C -0.22492700 -2.83663600 0.36297500  
H 1.65866100 -2.60199200 1.34192700  
C -0.26556100 -2.42251500 -2.06684100  
H 1.63856200 -1.88976300 -2.91501200  
C -0.95678100 -2.79944600 -0.87027200  
H -0.7742800 -3.04716300 1.26881700  
H -0.83278300 -2.36951600 -2.99047100  
O -2.20869600 -3.07877700 -0.90059800  
I -3.60076200 -1.14649600 -0.53996500  
H -1.95676400 -0.01059000 -0.99953300  
C -0.96161500 0.13253000 -0.02784800  
C -1.79448300 0.47062200 -2.30884500  
C 0.24164800 0.73576900 -0.39627100  
H -1.10723400 -0.23659100 0.98157600  
C -0.60043400 1.09240500 -2.64343700  
H -2.58946900 0.35490000 -3.03806900  
C 0.42179200 1.20391900 -1.69383400  
H 1.04093200 0.80241900 0.33103600  
H -0.45840200 1.47472500 -3.64903800  
H 1.36282400 1.66992600 -1.96972800  
C -3.83926500 2.36126700 0.44601300  
O -3.31989800 2.05659700 1.62711000  
C -3.41693700 3.73980100 -0.04282800  
O -4.56728800 1.61098200 -0.18071600  
H -3.30891900 -0.84295600 2.57912800  
F -2.18612300 -1.67576900 2.28032000  
H -1.88277200 3.78878700 -0.08861600  
H -1.49040400 3.04660700 -0.79167700  
H -1.55981200 4.77970600 -0.42583000  
H -1.45119600 3.59407700 0.89629000  
C -3.99563100 3.97767400 -1.43551900  
H -5.08691200 3.91606600 -1.42488400  
H -3.70163500 4.96959500 -1.79358800  
H -3.62515000 3.22810800 -2.14184900  
C -3.94312600 4.78754100 0.94963700  
H -5.03608100 4.75905600 1.00925400  
H -3.53604300 4.61658000 1.94924800  
H -3.64646800 5.78761000 0.61655300  
F -0.16695000 -1.99423400 3.25573600  
H -1.25241400 -1.82836100 2.85447600  
F -4.08856400 -0.24822900 2.61366900  
H -3.66377900 -1.18118800 1.94488000  
F 0.77936600 -0.06020400 2.48400700  
H 0.38946000 -0.95408300 2.89169400  
F 2.85354300 -0.23529800 1.30367400  
H 2.05402500 -0.18450800 1.86836300

**TS1**

C 8.05911900 2.51273200 -0.34055900  
C 7.16873500 1.60818000 -0.91676900  
C 6.00631200 1.23196400 -0.24542100  
C 5.74777900 1.77339100 1.01805600  
C 6.63407800 2.67571600 1.59560400  
H 7.79342800 3.04826700 0.91606100  
H 8.95955000 2.79934200 -0.87521700  
H 7.37723700 1.19279900 -1.89991400  
H 4.83979100 1.47492300 1.53877900  
H 6.42032800 3.09190500 2.57528800  
H 8.48523800 3.75390900 1.36512800  
C 5.03704600 0.23125400 -0.82579600  
H 4.01414200 0.57101000 -0.64542100  
H 5.17109100 0.14575300 -1.90910500  
C 5.21103500 -1.13953000 -0.16306000  
H 5.30673800 -1.02298900 0.92082500  
H 6.12619000 -1.63718600 -0.50325000  
C 4.07120600 -2.10626300 -0.33738600  
O 3.95631200 -3.17055800 0.18880200  
O 3.13557700 -1.64277200 -1.26465600  
C 1.84391700 -2.00518800 -1.22458100  
H 1.20676200 -2.53788500 -0.08282000  
C 1.12778200 -1.72365700 -2.41224600  
C -0.14902900 -2.74667800 -0.12797900  
H 1.76200800 -2.75177000 0.81852700  
C -0.21798900 -1.96233800 -2.46609200  
H 1.67621200 -1.30994600 -3.25101700  
C -0.89663000 -2.51111200 -1.32948300  
H -0.68658200 -3.10320300 0.74410700  
H -0.79992200 -1.76310600 -3.36012900  
O -2.14988900 -2.77783200 -1.38970000  
I -3.53808500 -0.90214200 -0.80387200  
C -1.87870600 0.07505800 -1.05898400

C -0.89251600 0.24593600 -0.06783600  
C -1.69953400 0.96152700 -2.27096900  
C 0.32166100 0.88444600 -0.32659400  
H -1.05288200 -0.26525700 0.87648300  
C -0.49677600 1.61665800 -2.48953600  
H -2.48937800 0.97672400 -3.01464500  
C 0.51909100 1.55747800 1.52781000  
H 1.11815300 0.82341700 0.40518900  
H -0.34212300 2.15816700 -3.41711300  
H 1.46741100 2.05110600 -1.71720500  
C -3.89563400 2.43572700 0.60273200  
O -3.54468600 1.95064500 1.78645400  
C -3.39127900 3.85387500 0.37618600  
O -4.53993400 1.80245000 -0.21518300  
F 0.67030700 -2.98331700 2.83652800  
H -3.55095800 -0.97937500 2.30047900  
F -2.21730300 -1.51826800 2.11856100  
H -0.37758000 -3.35419600 2.84672600  
C -1.85961000 3.84330600 0.49223900  
H -1.41516600 3.19972900 -0.27475000  
H -1.47675500 4.85916400 0.34631000  
H -1.53958900 3.48464400 1.47371800  
C -3.81159000 4.31973300 -1.01573900  
H -4.89898800 4.30142500 -1.12643900  
H -3.45709500 5.34143100 -1.18591000  
H -3.38542900 3.66989900 -2.28460800  
C -3.99059500 4.76474900 1.45783300  
H -5.08417300 4.77327000 1.40378900  
H -3.69497500 4.43233800 2.45584900  
H -3.63483200 5.78971600 1.30992900  
F -1.51016400 -3.60203700 2.72603600  
H -1.96539500 -2.49898500 2.44403300  
F -4.40415300 -0.50265400 2.28460800  
H -3.93166000 1.04833500 1.91876800  
F 0.75749600 -0.72309300 2.31441200  
H 0.68275000 -1.70724300 2.59682600  
F 2.87655600 -0.35512600 1.96270000  
H 2.07308300 -0.51127500 1.72312800

**TS1g**

C 8.92182800 0.77805700 -0.85977100  
C 7.75477100 0.04079900 -1.05319000  
C 6.52548100 0.53340700 -0.61805300  
C 6.47901700 1.77791000 0.01878500  
C 7.64165900 2.51495200 0.21328600  
C 8.86736900 2.01585900 -0.22645800  
H 9.87274200 0.38485900 -1.20591500  
H 7.79908700 -0.92496800 -1.55103700  
H 5.51609500 2.15636900 0.35604700  
H 7.59301200 3.48147100 0.70531600  
H 9.77526800 2.59159700 -0.07682100  
C 5.24808800 -0.25285600 -0.78306700  
H 4.44897200 0.41798400 -1.10811600  
H 5.36462100 -1.02539800 -1.54915100  
C 4.83191500 -0.89472500 0.59427700  
H 4.99496500 -0.20592100 1.38102600  
H 5.43457100 -1.78921800 0.75189500  
C 3.38583500 -1.28666900 0.63950800  
O 2.71092300 -1.32483700 1.62367000  
O 2.88672500 -1.61837500 -0.62234500  
C 1.60782800 -1.98043900 -0.82901900  
C 0.81483200 -2.65711600 0.12764400  
C 1.12608700 -1.67038700 0.12646090  
C -0.49277300 -2.91962800 -0.18011500  
H 1.20747000 -2.90957300 1.10162500  
C -0.17315500 -1.94507400 -2.44099100  
H 1.80264700 -1.17799100 -2.81410000  
C -1.03896200 -2.58467700 -1.47705400  
H -1.14696400 -3.39354100 0.54245000  
H -0.59312400 -1.70341000 -1.54170900  
O -2.24163100 -2.83909500 -1.76399300  
I -3.71567700 -0.81321400 -1.27000800  
H -1.95281100 0.23581600 -1.21924300  
C -1.15561200 0.16256300 -0.07058100  
C -1.52974800 0.93519300 -2.36630400  
C 0.09968100 0.76591800 -0.09819400  
H -1.49169400 -0.35919200 0.81937700  
C -0.28565100 1.54843100 -2.35708200  
H -2.17393800 0.99192800 -3.23765100  
C 0.53890400 1.44637300 -1.23010100  
H 0.73358700 0.70113300 0.77412800  
H 0.04765900 2.09565500 -2.33307400  
H 1.52107100 1.90723300 -1.21280100  
C -4.02958800 2.37218800 0.56487800  
O -3.70246200 1.68786400 1.65808800  
C -3.44770400 3.77941200 0.55964300  
O -4.70613700 1.90897400 -3.3302500  
F 0.55439100 -2.83088300 3.08732700  
H -3.95870600 -1.28997400 1.86598200  
F -2.63988900 -1.92017900 1.62819700  
H -0.47779400 -3.25319700 2.95786400  
H -1.91615500 3.66166700 0.56537700  
H -1.56255800 3.14981300 -3.3645300  
H -4.77308200 4.66337700 0.58290800  
H -1.56411600 3.10733900 1.43955000  
C -3.91522000 4.50841400 -0.69802600  
H -5.00581300 4.58004600 -0.72889100  
H -3.49590600 5.51961700 -0.71646300  
H -3.59069500 3.97764700 -1.59776000  
C -3.91835600 4.51726500 1.82102900  
H -5.01045200 4.59197700 1.84897500

H -3.58349800 4.00115000 2.72381300  
H -3.50814100 5.53261300 1.82447500  
F -1.54898500 -3.61178700 2.71921000  
H -2.18904500 -2.67844300 2.20539300  
F -4.76014000 -0.74372900 1.88001600  
H -4.15418400 0.80782900 1.65722200  
F 0.24110800 -0.59440400 2.57710900  
H 0.44462000 -1.57768800 2.82810700  
F 1.96979700 1.06234600 2.73673000  
H 1.32425700 0.31451500 2.72875000  
F 3.05535400 1.33139600 0.53839100  
H 2.68050200 1.24841500 1.42721600

**TS2b**

C 8.14219700 -0.52032200 -1.11023200  
C 6.89348400 -0.69675200 -0.51981300  
C 5.86695500 0.22577700 -0.72996400  
C 6.11697700 1.33452600 -1.54248200  
C 7.36330500 1.51539600 -2.13463200  
C 8.37982500 0.58731800 -1.91979700  
H 8.92839100 -1.24951100 -0.94048100  
H 6.70952200 -1.56485300 0.10938300  
H 5.32267200 2.05748200 -1.71350800  
H 7.54015600 2.37949400 -2.76753600  
H 9.35136300 0.72554500 -2.38348900  
C 4.52625500 0.06277300 -0.05506400  
H 3.72429600 0.45558500 -0.68415300  
H 4.32653100 -0.99836200 0.12630200  
C 4.50007600 0.82436800 1.27268300  
H 4.73452700 1.88020600 1.11375500  
H 5.25732700 0.42468100 1.95936600  
C 3.20732500 0.82387600 2.03305000  
O 2.90182500 1.38786000 3.02430300  
O 2.53898500 -0.56992400 1.80500000  
C 1.29283700 -0.76356100 1.96666700  
C 0.34028900 0.28063400 2.29515800  
C 0.86824900 -2.14931900 1.78309500  
C -0.96416000 -0.03670700 2.36811400  
H 0.68307900 1.29687100 2.39860400  
C -0.42856500 -2.47486200 1.87871100  
H 1.64687400 -2.86453900 1.54290400  
C -1.44089600 -1.43834800 2.21494600  
H -1.73123600 0.71591600 2.51399100  
H -0.79409700 -3.48750400 1.74328400  
O -2.60520400 -1.73453300 2.38764200  
I -3.67762400 -1.75225800 -0.82193800  
C -1.58987200 -1.72528000 -1.02273100  
C -0.88896400 -0.53920000 -0.81475000  
C -0.92588100 -2.90141100 -1.39455700  
C 0.49475100 -0.53138300 -0.99231500  
H -1.39403700 0.36607000 -0.49261800  
C 0.45280000 -2.87696000 -1.57127800  
H -1.48657800 -3.81606400 -1.55634500  
C 1.16472900 -1.69305800 -1.36948400  
H 1.04450600 0.38165400 -0.79266100  
H 0.96912000 -3.78442700 -1.86949900  
H 2.24175900 -1.67421000 -1.51013700  
C -3.17924200 2.37325400 -0.09007800  
O -2.22125000 3.00871200 -0.75922100  
C -4.57593200 2.76868000 -0.55258500  
O -2.95286800 1.55402400 0.77966900  
F 2.19323400 1.55712300 0.55142200  
H 1.01943800 2.03592800 0.44034800  
C -4.71420500 2.38512700 -2.03429200  
H -4.57732500 1.30720300 -2.17439400  
H -5.71585300 2.65130700 -2.38858600  
H -3.97561300 2.91106000 -2.64448100  
C -5.61219300 2.02811100 0.28931300  
H -5.51230600 2.28314000 1.34800700  
H -6.20008000 2.29796400 -0.04303400  
H -5.48735900 0.94563400 0.19678900  
C -4.73938400 4.28764200 -0.39518700  
H -4.62826100 4.58913000 0.65176700  
H -3.99711200 4.82478100 -0.99042300  
H -5.73925500 4.58452600 -0.72923900  
F 0.00877700 2.26191300 0.38952400  
H -1.34099900 2.75115600 -0.38534100

**TS2c**

C 7.50399300 0.18622600 -2.37812600  
C 6.28097400 -0.16527400 -1.81475000  
C 5.64481800 0.67936800 -0.90203000  
C 6.26146900 1.88487300 -0.56130500  
C 7.48527600 2.24100300 -1.12176400  
C 8.10955600 1.39200300 -2.03200300  
H 7.98284200 -0.47894800 -3.09001300  
H 5.80809700 -1.10574000 -2.08976000  
H 5.77358200 2.55149500 0.14591100  
H 7.94949000 3.18384400 -0.84988300  
H 9.06199100 1.66972600 -2.47202200  
C 4.34176400 0.27297800 -0.25635000  
H 3.76025700 1.15064800 0.03183700  
H 3.73759500 -0.30923400 -0.96026400  
C 4.60804300 -0.56285900 0.99794500  
H 5.12660300 0.03078300 1.75628000  
H 5.26037300 -1.41225300 0.75639000  
C 3.42428700 -1.16015600 1.69827100  
O 3.32942900 -1.64004600 2.77143000  
O 2.55727200 -1.85311900 0.54723800  
C 1.34025800 -2.16287900 0.70925100  
C 0.59548400 -1.96739300 1.94938300

C 0.70163500 -2.75081500 -0.46581000  
C -0.69064300 -2.35069800 1.99438600  
H 1.07055100 -1.47578600 2.78547300  
C -0.58418000 -3.12666200 -0.42314100  
H 1.31550800 -2.83085500 -1.35594200  
C -1.36579400 -3.00026000 0.83659100  
H -1.30343900 -2.17739700 2.87252800  
H -1.10362800 -3.55330200 -1.27560200  
O -2.49767700 -3.42727300 0.92095900  
I -4.05547800 -1.24092600 -1.45219400  
C -2.10040400 -0.51462900 -1.25571800  
C -1.65580600 -0.08618200 -0.00477900  
C -1.26900400 -0.44464900 -2.38019200  
C -0.36025100 0.41345200 0.11814900  
H -2.31006400 -0.12403500 0.86096500  
C 0.02334900 0.04656900 -2.23635900  
H -1.63253800 -0.76738100 -3.35005600  
C 0.48572600 0.46465800 -0.98410700  
H -0.00532000 0.72828000 1.09071000  
H 0.67215600 0.10359000 -3.10543000  
H 1.49648700 0.83949700 -0.86080000  
C -3.12866500 2.46388100 1.08638700  
O -1.98363100 2.58892100 1.76986500  
C -3.29514100 3.54728000 0.02928000  
O -3.91190200 1.56136400 1.28095000  
H -0.30901000 0.47187800 3.27903100  
F 1.07458400 0.61009900 3.50624300  
C -2.18054800 3.35913900 -1.01363800  
H -2.25464500 2.37799000 -1.49726100  
H -2.27224300 4.12932500 -1.78733400  
H -1.19279500 3.44109600 -0.55156700  
C -4.66495700 3.39120700 -0.62747400  
H -5.46680100 3.50210100 0.10792300  
H -4.79282700 4.15299800 -1.40369000  
H -4.76624300 2.40177500 -1.08225800  
C -3.16090800 4.92688700 0.68785200  
H -3.93360300 5.07580400 1.44933700  
H -2.18302700 5.04194300 1.16164500  
H -3.27715400 5.70813500 -0.07095700  
H 1.67821200 0.53526800 2.63555700  
F -1.25902300 0.32505500 3.50563300  
H -1.88850200 1.80852000 2.36245800  
F 2.28316400 0.33130700 1.58200000

**TS2d**

C 6.05063000 -3.91143500 -1.10154000  
C 4.85363000 -3.40877400 -0.59989500  
C 4.59789700 -2.03573000 -0.60520400  
C 5.56756900 -1.17356300 -1.12059700  
C 6.76663000 -1.67154700 -1.62328600  
C 7.01076500 -3.04246600 -1.61463000  
H 6.23242000 -4.98164000 -1.09560300  
H 4.10335000 -4.08968000 -0.20386000  
H 5.37587200 -0.10296600 -1.13255600  
H 7.50858900 -0.98865600 -0.202538400  
H 7.94358000 -3.43256400 -2.00897400  
C 3.31953300 -1.48612000 -0.01854800  
C 3.06511000 -0.53286000 -0.48795800  
H 2.49095100 -2.17927400 -0.19870400  
C 3.47953900 -1.26459300 1.48658700  
H 4.26084200 -0.52497100 1.68718300  
C 3.78834400 -2.19575100 1.97829700  
C 2.28258000 -0.79094000 2.25399000  
O 2.17568100 -0.39298000 3.35576500  
O 1.05825700 -1.77426000 1.75612300  
C -0.15403700 -1.46272100 1.90609000  
C -0.61452600 -0.22940300 2.54701600  
C -1.11469500 -2.44095500 1.39625700  
H -1.93216900 0.00770400 2.62597200  
H 0.10736600 0.48043300 2.91799000  
C -2.43063400 -2.20164500 1.46909800  
H -0.69596600 -3.32741800 0.93328800  
C -2.94168100 -0.96200200 2.11691000  
H -2.31836600 0.91727100 3.07244600  
H -3.17805400 -2.88709600 1.08142500  
O -4.13071900 -0.76510400 2.24719900  
I -5.05622800 -1.04392700 -1.33976300  
C -2.96218300 -0.88616300 -1.30041500  
C -2.37029000 0.21290200 -0.67635000  
C -2.18676700 -1.88722800 -1.89144700  
C -0.97919500 0.29682600 -0.63025300  
H -2.97131500 0.99357400 -0.22206900  
C -0.80045400 -1.78778500 -1.83770900  
H -2.66114500 -2.72838300 -2.38546900  
C -0.19492100 -0.70325100 -1.19766100  
H -0.50759400 1.13255200 -0.12439800  
H -0.19154500 -2.56010700 -2.29878800  
C 0.88583100 -0.62426500 -1.14371900  
C 0.55651900 3.88069700 -1.12762100  
O 0.22250600 3.33753100 0.06078700  
C 2.04424100 3.75686300 -1.42161200  
O -0.26434700 4.37225500 -1.86196600  
F 1.66774200 0.48887600 1.07968000  
H -1.50675300 2.70431800 1.90065300  
F -0.56320800 2.54136300 3.02248700  
H 1.68191100 1.54434900 1.74736800  
C 2.34085400 2.26296000 -1.64114500  
H 1.74203600 1.86209800 -2.46702500  
H 3.39965600 2.13621100 -1.89599900  
H 2.12396100 1.68651900 -0.73710900  
C 2.36535500 4.55348800 -2.68411200

H 2.13007600 5.61282500 -2.54772400  
H 3.43063500 4.45997900 -2.91931500  
H 1.78222200 4.19056400 -3.53420700  
C 2.85383300 4.27602300 -0.22575900  
H 2.65295100 4.3803800 -0.04954300  
H 2.61345000 3.72421200 0.68605100  
H 3.92341300 4.16607500 -0.43560100  
F 1.66805900 2.36858800 2.40465200  
H 0.40680300 2.65278500 2.73015700  
F -2.08628700 2.63836800 1.12355700  
H -0.75448900 3.37074100 0.14514200

**TS2e**

C -7.93178900 -0.17672800 0.23441500  
C -6.60663300 -0.50844400 -0.03311400  
C -5.56856800 0.53409200 0.32537200  
C -5.88348300 1.55974400 0.95566600  
C -7.20727800 1.89596500 1.22493600  
C -8.23485500 1.02785700 0.86445100  
H -8.72736100 -0.86017300 -0.04553200  
H -6.37218200 -1.45195800 -0.52134300  
H -5.08216200 2.23669100 1.24256800  
H -7.43580900 2.83446100 1.72013800  
H -9.26712600 1.28717400 1.07660300  
C -4.13486900 0.01709600 -0.00943700  
H -3.45180000 0.47428200 0.70930200  
H -3.98329900 -1.06624800 0.02401500  
C -3.78772700 0.53546200 -1.40677800  
H -3.91330000 1.62162700 -1.45552400  
H -4.46190800 0.10109100 -2.15556900  
C -2.40567700 0.28429100 -1.92591200  
O -1.84105900 0.67558300 -2.87685500  
O -2.12258900 -1.32331800 -1.55280400  
C -0.97152900 -1.83375000 -1.56121600  
C 0.24043100 -1.11254900 -1.93930000  
C -0.90884100 -3.24945300 -1.18410200  
C 1.42273800 -1.74984900 -1.91224300  
H 0.16680300 -0.08848100 -2.26884100  
C 0.26703100 -3.88739200 -1.14813800  
H -1.84965900 -3.71782800 -0.91806600  
C 1.52733700 -3.18752000 -1.52529100  
H 2.34930400 -1.24942200 -2.17818700  
H 0.36164900 -4.92937800 -0.86108800  
O 2.58598200 -3.77606300 -1.54562700  
I 2.97685900 -0.97991100 1.08790500  
C 1.19010400 -1.98973300 1.51209500  
C -0.01333200 -1.28976600 1.43264900  
C 1.20269700 -3.33981400 1.86777700  
C -1.20869900 -1.94681200 1.72504800  
H -0.01735300 -0.24600400 1.14452300  
C 0.00114600 -3.98119300 2.17422800  
H 2.14265200 -3.88042100 1.92030900  
C -1.20423300 -3.28804100 2.10759400  
H -2.14123100 -1.39334900 1.66534900  
H 0.01596000 -5.02591500 2.47025100  
H -2.13549500 -3.78847200 2.35439000  
C 2.43322700 3.14743800 0.78211200  
O 3.21478800 2.66258300 -0.20229200  
C 1.52038000 4.28696800 0.33004900  
O 2.52338000 2.76554900 1.92321000  
F 1.89967800 1.29392200 2.32526400  
H 4.82486100 0.53363700 -0.84097200  
F 4.08041500 0.29776200 -2.15886000  
C 0.18063600 4.15363400 1.06874600  
H 0.34148700 4.07586700 2.14661000  
H -0.44073800 5.03220400 0.86406500  
C -0.35535100 3.26104600 0.73515300  
C 2.23158500 5.57198100 0.80371500  
H 3.20472100 5.67982700 0.31317000  
H 1.62076700 6.44464700 0.54910200  
H 2.38672900 5.55470400 1.88617500  
C 1.31443400 4.33788400 -1.17551100  
H 2.26612100 4.43535500 -1.70379100  
H 0.81470900 3.43912900 -1.54111900  
H 0.68878800 5.20187400 -1.42468100  
H 3.24833100 0.81759900 -0.21222700  
F 5.10196900 0.72533500 0.06179800  
H 3.84996700 2.03643500 0.20691800  
F 0.70578600 1.39355100 -0.30938900  
H 1.47352100 1.39260800 -1.42307700  
F -1.47922500 0.75764800 -0.40180000  
H -0.34216900 1.13585700 -0.41620400

**TS2**

C -8.36606100 0.40772000 0.47275100  
C -7.02680600 0.03841800 0.39006600  
C -6.03915000 0.98863000 0.12078400  
C -6.41989900 2.31851700 -0.06768200  
C -7.75852000 2.69293400 -0.01388300  
C -8.73484300 1.73772900 0.28428500  
H -9.12143900 -0.34148600 0.68828400  
H -6.74077000 -1.00020100 0.54227000  
H -5.65862200 3.06708400 -0.27423000  
H -8.03819200 3.73180600 -0.13016300  
H -9.77830100 2.02847700 0.35109700  
C -4.59246200 0.57680800 -0.01586000  
C -3.93004900 1.40947500 0.22917600  
H -4.36502600 -0.24298600 0.67261900  
C -4.30584400 0.12957500 -1.45176000  
H -4.45588400 0.95757100 -2.15147100  
H -4.99737600 -0.66897900 -1.74869800

C -2.93834300 -0.40132200 -1.75718600  
O -2.38995000 -0.61528400 -2.77412200  
O -2.69248600 -1.52587500 -0.55529400  
C -1.60404900 -2.12800400 -0.35378300  
C -0.41488300 -2.00787000 -1.19349900  
C -1.61199500 -3.03178600 0.80304400  
C 0.64732600 -2.78783600 -0.92716600  
H -0.41657300 -1.32329100 -2.02937800  
C -0.53636500 -3.76955500 1.10026000  
H -2.52106700 -3.03893400 1.39361100  
C 0.66991100 -3.72924800 0.23005800  
H 1.53380600 -2.75752300 -1.55080800  
H -0.49828900 -4.43715300 1.95471800  
O 1.62248000 -4.44712200 0.44290500  
I 2.90374700 -0.74752300 0.75384400  
C 1.10816200 -0.85120300 1.82957300  
C 0.00581200 -0.12929200 1.37245800  
C 1.01896000 -1.61300400 2.99643100  
C -1.18692300 -0.15923200 2.09609900  
H 0.07336300 0.44526800 0.45534000  
C -0.17502400 -1.62472900 3.71979200  
H 1.87924300 -2.17441700 3.34718300  
C -1.27575800 -0.89601800 3.27700300  
H -2.03565500 0.40550300 1.72236500  
H -0.23548000 -2.20335600 0.46368000  
H -2.19887100 -0.90180900 3.84839400  
C 4.07674600 2.72633200 0.44669400  
O 4.06858600 2.21281300 -0.79284100  
C 3.01361800 3.80039700 0.63813700  
O 4.82121300 2.33085000 1.31230400  
F 0.40311500 -0.05185800 -3.70179300  
H 5.00363900 -0.42990700 -1.85998700  
F 4.48816400 -0.62064200 -3.26698900  
H 1.46914300 -0.85830800 -3.43998100  
C 1.65857400 3.07470100 0.70954000  
H 1.64691200 2.36045700 1.54148300  
H 0.86024500 3.80673200 0.87698100  
H 1.44731000 2.53440100 -0.21850900  
C 3.28558300 4.53687300 1.94841200  
H 4.25685500 5.03979500 1.92022000  
H 2.50854600 5.28939200 2.11951400  
H 3.29662300 3.84006900 2.78985800  
C 3.01959800 4.77565400 -0.54447500  
H 3.98670900 5.28161500 -0.63283600  
H 2.81661500 4.25611600 -1.48356500  
H 2.24939400 5.53971400 -0.39281200  
F 2.19685100 -1.49110100 -3.16800400  
H 3.57756000 -0.95327900 -3.25686800  
F 5.24805800 -0.23689600 -0.94594800  
H 4.68167600 1.44599600 -0.79570800  
F 0.05182500 1.19499300 -1.78089200  
H 0.23522700 0.55712600 -2.88682900  
F -1.94740800 0.78474900 -0.77457200  
H -0.93824700 1.04634700 -1.33869800

TS2g

C -8.51653600 1.48987500 0.11970600  
C -7.25350900 0.96884000 -0.14570600  
C -6.12055100 1.48564900 0.48675800  
C -6.27659700 2.53899500 1.38974800  
C -7.53797100 3.06370100 1.65836900  
C -8.66116100 2.53985800 1.02346900  
H -9.38821900 1.07376800 -0.37568900  
H -7.14367200 0.14568700 -0.84857900  
H -5.40137000 2.94639600 1.89032200  
H -7.64364700 3.87924200 2.36684600  
H -9.64539200 2.94576300 1.23407200  
C -4.74590500 0.9510100 0.16191400  
H -4.06713500 1.08981000 1.00568700  
H -4.79859300 -0.12092300 -0.05369500  
C -4.16853600 1.68427700 -1.05052000  
H -4.05473600 2.75164500 -0.83754200  
H -4.84910500 1.60034200 -1.90736000  
C -2.83300900 1.24485900 -1.56696700  
O -2.09968100 1.72551900 -2.34687300  
O -2.95753400 -0.41243800 -1.64311100  
C -1.95201200 -1.16488800 -1.74034100  
C -0.57818700 -0.68312900 -1.85996200  
C -2.24375300 -2.60133400 -1.75844900  
C 0.41819300 -1.57077900 -2.01295200  
H -0.38582900 0.37795500 -1.86411400  
C -1.25039800 -3.49012000 -1.87930600  
H -3.28503800 -2.88184400 -1.64692600  
C 0.16030000 -3.03999900 -2.04411400  
H 1.45341500 -1.25890400 -2.12074300  
H -1.41831000 -4.56207200 -1.88386400  
O 1.05330600 -3.83917100 -2.22157800  
I 1.96450600 -2.12374600 1.11458200  
C -0.07121700 -2.61958700 1.20326900  
C -1.00581600 -1.58618700 1.24974900  
C -0.48460600 -3.95262900 1.23755500  
C -2.36235500 -1.89250000 1.34938000  
H -0.68243800 -0.55338900 1.19715600  
C -1.84471700 -4.24613800 1.35459500  
H 0.24811800 -4.75231000 1.19380300  
C -2.78392700 -3.22079700 1.41728000  
H -3.07927000 -1.07795800 1.38364100  
H -2.16276800 -5.28330300 1.40224400  
H -3.83957200 -3.45389200 1.51718100  
C 4.29401800 2.40721000 0.70758200  
O 3.30908500 1.50665100 0.53395500

C 3.90742400 3.80241300 0.24332200  
O 5.36754700 2.09388800 1.16875600  
F 1.40378100 1.44730100 -1.47267800  
H 5.40210200 -0.51164000 1.07965300  
F 6.60700000 -0.211319600 0.23581700  
H 2.57990100 0.63722300 -1.49231300  
C 2.56035900 4.19318700 0.86729000  
H 2.62317200 4.20960000 1.96049700  
H 2.28143300 5.19652000 0.52803300  
H 1.77030300 3.49436800 0.58293600  
C 5.00285100 4.78039400 0.66321100  
H 5.96491600 4.49591000 0.22992400  
H 4.74642100 5.78915200 0.32353300  
H 5.11873300 4.79652100 1.75073300  
C 3.77916100 3.77410200 -1.28937600  
H 4.71992900 3.46897400 -1.75522600  
H 2.98941600 3.08602900 -1.60135800  
H 3.52114600 4.77665700 -1.64696200  
F 3.29034800 -0.01787700 -1.69909800  
H 6.26710300 0.46341300 -0.35853800  
F 4.52090800 -0.71690300 1.43105900  
H 3.64148400 0.65328000 0.90015100  
F 0.21159300 1.53305700 0.52095400  
H 0.96819200 1.50225000 -0.54247100  
H -1.97184400 1.03654900 0.06334500  
F -0.82907700 1.37908400 0.27940600  
F 5.45840900 1.13578100 -1.52277700  
H 4.60677600 0.67950400 -1.61506800

5a

C 5.75453700 -2.84517800 -1.07278400  
C 4.84769400 -1.92176500 -0.56370800  
H 5.13412500 -0.55375300 -0.59108000  
C 6.34617100 -0.12868200 -1.13430200  
H 7.25671700 -0.10504400 -1.64595600  
C 6.96270500 -2.41097300 -1.61597500  
H 5.51793500 -3.90451200 -1.05043200  
H 3.90101100 -2.25158200 -0.14024500  
H 6.57641000 0.93378800 -1.16268100  
H 8.19443000 -0.70578100 -2.07039300  
H 7.66992800 -3.13032800 -2.01654900  
C 4.15082300 0.42155100 0.00845000  
H 4.31105400 1.42492200 -0.40064000  
H 3.13158900 0.11766400 -0.24926900  
C 4.29524300 0.45280800 1.53362100  
H 5.24707100 0.91024500 1.82918600  
H 4.29745700 -0.56237900 1.94100300  
C 3.20489200 1.17384900 2.26912000  
O 2.99637300 1.24300000 3.43006000  
O 1.78340700 -0.93549400 1.49710400  
C 0.57910400 -1.02510500 1.68260600  
C -0.13947500 -0.03616200 2.52771800  
C -0.20711700 -2.12155200 1.07128700  
C -1.44444400 -0.17637700 2.78350800  
H 0.45873700 0.77198100 2.94066300  
C -1.51034200 -2.26593600 1.33072900  
H 0.33760100 -2.78296900 0.40499200  
C -2.21894400 -1.33074800 2.24708900  
H -2.00109800 0.51560700 3.40825800  
C -2.11524000 -3.05610300 0.89377800  
O -3.38072400 -1.50519700 2.55687000  
I -3.69676500 1.02039900 -0.26256000  
C -3.56515700 -1.10027100 -0.84773800  
C -2.55200100 -1.49376000 -1.71890700  
C -4.48200900 -2.01111800 -0.32858300  
C -2.46673200 -2.83965300 -2.07375700  
H -1.83510100 -0.77161000 -2.09852700  
C -4.38159800 -3.35114300 -0.69914000  
H -5.24762400 -1.68776900 0.36734500  
C -3.37607900 -3.76727100 -1.56963000  
H -1.68071800 -3.15814400 -2.75154400  
H -5.09178600 -4.06779000 -0.29880100  
H -3.30287800 -4.81204500 -1.85486200  
C -0.07265300 1.55841200 -1.40363200  
O 0.56535000 0.73746200 0.54122400  
O 0.02809900 3.05840500 -1.12336400  
O -0.66519100 1.08505400 -2.33895900  
C 1.48396600 3.49507100 -1.36295700  
H 1.79347000 3.27572000 -2.38956700  
H 1.57110800 4.57433600 -1.20119600  
H 2.17675800 2.99840900 -0.67636600  
C -0.90613000 3.79006300 -2.08567800  
H -1.94267700 3.47406200 -1.93472400  
H -0.83693100 4.86946800 -1.91758600  
H -0.64223900 3.57452000 -3.12355800  
C -0.37558700 3.35463200 0.33030600  
H -1.36935400 2.95382800 0.55452800  
H 0.33266000 2.94359800 1.05606600  
H -0.40058900 4.43842000 0.48211700  
F 2.37181800 1.87280600 1.41415400  
H 1.06259200 1.23305600 0.13303400

5b

C 7.26606900 -0.55985300 1.82385400  
C 6.13564400 -0.51574800 1.01429000  
H 6.13550100 0.22493800 -0.17083600  
C 7.28905400 0.92378300 -0.52785100  
C 8.42347800 0.88203100 0.27969200  
C 8.41418100 0.14014100 1.45744500  
H 7.25364900 -1.14376800 2.73898400  
H 5.23786200 -1.06331100 1.29419800

H 7.30051700 1.50056400 -1.44975100  
H 9.31549500 1.42693700 -0.01349900  
H 9.29810400 0.10468300 2.08629300  
C 4.88224700 0.29570400 -1.00817200  
H 5.12803500 0.53902700 -2.04664400  
H 4.37385200 -0.67199600 -1.00685800  
C 3.92318000 1.34922700 -0.44536500  
H 4.33826700 2.35898300 -0.55542100  
H 3.75552300 1.19540500 0.62430800  
C 2.56509700 1.35583300 -1.07628600  
O 1.60125700 1.95880600 -0.69331000  
O 2.25680800 -0.95642500 0.14209700  
C 1.23399300 -1.28686100 0.72701300  
C 0.31949500 -0.27857700 1.31462700  
C 0.87678700 -2.72009800 0.86322000  
C -0.78386900 -0.65335700 1.97133900  
H 0.56447100 0.76582000 1.15219300  
C -0.22648300 -3.09345200 1.51871200  
H 1.55461700 -3.42548100 0.39281200  
C -1.12623400 -2.09010800 2.15442200  
H -1.48019800 0.06781800 2.38833200  
H -0.52218100 -4.13201300 1.63224500  
O -2.09742500 -2.43985600 2.79359300  
I -3.97331500 -0.88830000 0.04364700  
C -2.35514000 -1.81897100 -0.92657100  
C -1.33306000 -1.02441900 -1.43810800  
C -2.33660500 -3.20557700 -1.06800400  
C -0.27421900 -1.63355500 -2.10870900  
H -1.35133800 0.05253800 -1.32094800  
C -1.27368300 -3.79961400 -1.74748000  
H -3.14084200 -3.81071900 -0.66289800  
C -0.24364400 -3.01900700 -2.26570400  
H 0.52080800 -1.00942200 -2.50512500  
H -1.25666100 -4.87854000 -1.86806400  
O 0.58018400 -3.48753300 -2.79498900  
C -2.23422300 2.64600300 -0.14645400  
O -2.50576200 2.88201800 -1.42885600  
C -3.20596900 3.32459700 0.80853600  
O -1.26517200 2.00016100 0.20623200  
F 2.48498400 0.64375700 -2.20134100  
H 0.23693800 1.81678400 -1.66396900  
C -4.64148200 3.24059900 0.27922700  
H -4.96250500 2.19963700 0.17081200  
H -5.31767700 3.73627800 0.98370700  
H -4.73221000 3.72638000 -0.69469900  
C -3.09555300 2.66936100 1.28449600  
H -2.06793500 2.71295000 2.55500700  
C -3.74854100 3.18602500 2.89516900  
H -3.39895300 1.61769600 2.13957300  
C -2.77039100 4.79932000 0.88863300  
H -1.74455700 4.88364000 1.26151000  
H -2.82638600 5.27626400 -0.09414000  
H -3.43163800 5.33869000 1.57478600  
F -0.30823100 7.17791400 -2.44863900  
H -1.78444300 2.46986500 -1.95837700

5c

C 6.92490800 -1.32492900 -2.02302100  
C 5.81613200 -0.90141500 -1.29784100  
C 5.52917300 0.46040900 -1.16808400  
C 6.37360100 1.39033800 -1.77417200  
C 7.48467500 0.96945900 -2.50185100  
C 7.76232600 -0.38868400 -2.62734500  
H 7.13466200 -2.38554100 -2.12064700  
H 5.15592000 -1.62619900 -0.82517900  
H 6.15624800 2.45178700 -1.68111100  
H 8.13140400 1.70316100 -2.97279800  
H 8.62631200 -0.71766900 -3.19585800  
C 4.34431700 0.89302000 -0.33961000  
H 4.01847600 1.89789100 -0.62865000  
H 3.50838100 0.20808100 -0.50678400  
H 4.69836400 0.86949300 1.15010900  
H 5.44696700 1.63339900 1.39239200  
H 5.13359900 -0.09501700 1.42822600  
C 3.54913200 1.06806800 2.08795900  
O 3.50105300 1.00024700 3.26736200  
O 2.84104200 -1.32573000 1.20059100  
C 1.69394100 -1.70183300 1.39950700  
C 0.95176100 -1.27767400 2.61353200  
C 1.00763000 -2.59082200 0.43371100  
C -0.31132000 -1.66826900 2.81746700  
H 1.48753400 -0.64031200 3.11663000  
C -0.24961200 -2.99564300 0.64244000  
H 1.58029300 -2.86961600 -0.44533000  
C -1.00191400 -2.57857400 1.85832100  
H -0.89588000 -1.36040400 3.67862800  
H -0.78911600 -3.63604100 -0.04951700  
O -2.12774700 -2.97739100 2.07238700  
I -3.77352600 -1.93522900 -1.14955400  
C -1.96267300 -0.88314600 -1.04219400  
C -1.67084100 -0.14550800 0.10394200  
C -1.06557000 -0.93792200 -2.11038700  
C -0.46629400 0.55293000 0.16873200  
H -2.37242200 -0.10705200 0.93022800  
C 0.13803800 -0.24334000 -2.02358600  
H -1.30509500 -1.51370600 -2.99799200  
C 0.44062700 0.50423900 -0.88486300  
H -0.24836100 1.13417600 1.05729600  
H 0.83757300 -0.28078200 -2.85321700  
H 1.37177900 1.05760800 -0.82513600  
C -3.53434100 2.34963000 0.22687700

|           |             |              |              |          |             |             |             |           |             |             |             |
|-----------|-------------|--------------|--------------|----------|-------------|-------------|-------------|-----------|-------------|-------------|-------------|
| O         | -2.55852300 | 2.80989100   | 1.02947900   | H        | 9.10444900  | 1.97310500  | -0.84815500 | C         | -1.52394100 | -3.45070600 | 2.10997100  |
| C         | -3.59495700 | 3.09131400   | -1.10053600  | H        | 9.67368400  | 0.47387900  | 1.04525300  | H         | -2.23615900 | -1.41546900 | 2.13177800  |
| O         | -4.25573000 | 1.43408100   | 0.54689900   | C        | 4.59378700  | 0.72038900  | -0.75254500 | H         | -0.53394100 | -5.35890000 | 1.97172500  |
| H         | -0.92858800 | 1.25288300   | 3.14968000   | H        | 4.54720400  | 1.09054000  | -1.78162700 | H         | -2.47800200 | -3.87470500 | 2.40756400  |
| F         | 0.58574100  | 1.74370000   | 3.40327300   | H        | 4.13908500  | -0.27396000 | -0.73467100 | C         | 3.49861100  | 2.45993300  | 0.35830200  |
| C         | -2.25710300 | 2.89046300   | -1.82979700  | C        | 3.78151800  | 1.63902500  | 0.16565600  | O         | 4.39068200  | 2.09136300  | 1.23985000  |
| H         | -2.07657100 | 1.82969600   | -2.03809900  | H        | 4.11607300  | 2.68060500  | 0.08284700  | C         | 2.87751600  | 3.81569500  | 0.63331000  |
| H         | -2.28078400 | 3.42762700   | -2.78431900  | C        | 3.90456300  | 1.35369400  | 1.21447900  | O         | 3.26098700  | 1.74492800  | -0.62139300 |
| H         | -1.42273000 | 3.27072900   | -1.23401000  | H        | 2.30793400  | 1.62444700  | -0.08625200 | F         | 1.47358100  | 1.67327800  | -2.18417300 |
| C         | -4.74017600 | 2.51550700   | -1.93070500  | O        | 1.45660100  | 2.14283100  | 0.58516800  | H         | 5.22676200  | 0.04445300  | -0.72511800 |
| H         | -5.69697100 | 2.63507900   | -1.41514600  | C        | 2.39813000  | -0.79035200 | 0.88600000  | F         | 5.21857300  | 0.34469800  | -2.15485100 |
| H         | -4.79326700 | 3.02986100   | -2.89593700  | O        | 1.43593300  | -1.49569100 | 1.16141200  | H         | 2.37336000  | 0.93429000  | -2.97204800 |
| H         | -4.58975900 | 1.44624000   | -2.10683000  | C        | 0.19311200  | -0.91866700 | 1.72495400  | C         | 4.02827600  | 4.83649900  | 0.70273500  |
| C         | -3.81780000 | 4.58545500   | -0.82585800  | C        | 1.49008600  | -2.96078800 | 0.93880100  | H         | 4.57395500  | 4.88537400  | -0.24539600 |
| H         | -4.75855600 | 4.75090200   | -0.29050400  | C        | -0.85940000 | -1.69576600 | 2.00496100  | C         | 3.61080100  | 5.82755100  | 0.90542800  |
| H         | -3.00213000 | 5.00061800   | -0.22837600  | H        | 0.17553500  | 0.15329200  | 1.88803200  | H         | 4.73242500  | 4.58367800  | 1.49843400  |
| H         | -3.86747600 | 5.12864500   | -1.77557000  | C        | 0.43418200  | -3.73629200 | 1.20238700  | C         | 1.90824500  | 4.19871800  | -0.48395300 |
| H         | 1.25945100  | 1.62264700   | 2.74989500   | C        | 2.41898300  | -3.34434400 | 0.52867800  | H         | 1.05211200  | 3.52379100  | -0.51434200 |
| F         | -1.82483500 | 0.99421100   | 2.96556900   | H        | -0.82541500 | -3.16367900 | 1.75145500  | H         | 1.54003000  | 5.21316300  | -0.30548900 |
| H         | -2.53066800 | 2.22876800   | 1.81841700   | H        | -1.79049000 | -1.30546000 | 2.40094200  | H         | 2.39624300  | 4.17972400  | -1.46332600 |
| F         | 2.37839600  | 1.43381000   | 1.43234700   | H        | 0.43094200  | -4.80784400 | 1.02869500  | C         | 2.15374600  | 3.75657600  | 1.98838200  |
|           |             |              |              | H        | -1.78460100 | -3.87026500 | 1.98649000  | H         | 1.35842400  | 3.00862900  | 1.96253700  |
| <b>5d</b> |             |              |              | I        | -3.09197400 | -1.35236500 | -0.71003800 | H         | 2.85083300  | 3.50725100  | 2.79237200  |
| C         | 7.17609800  | -1.88394900  | -0.64792900  | C        | -1.29896300 | -2.19956900 | -1.39806800 | H         | 1.71496200  | 4.73724700  | 2.19906600  |
| C         | 5.91926000  | -1.30600500  | -0.50106900  | C        | -0.19136400 | -1.37872400 | -1.60716400 | F         | 3.07476600  | 0.34780100  | -3.35058900 |
| C         | 5.68065000  | -0.00410900  | -0.95082000  | C        | -1.23148500 | -3.56996900 | -1.65024600 | H         | 4.33952700  | 0.35581200  | -2.57117500 |
| C         | 6.72218000  | 0.70828300   | -1.54547900  | C        | 0.98975700  | -1.94135000 | -2.09064700 | F         | 5.30599500  | -0.13542700 | 0.26317300  |
| C         | 7.98169000  | 0.13172200   | -1.69369600  | H        | -0.25515000 | -0.31719400 | -1.39240200 | H         | 4.76682900  | -1.21297600 | 0.93248100  |
| C         | 8.21091700  | -1.16586300  | -1.24499500  | C        | -0.04727800 | -4.11586200 | -2.14484200 | F         | 0.70847300  | 1.41667700  | 0.43628100  |
| H         | 7.34879500  | -2.89738000  | -0.29885300  | H        | -2.09521300 | -4.20158600 | -1.46949600 | H         | 2.11348900  | 1.78737600  | -1.39148500 |
| H         | 5.10492100  | -1.85899600  | -0.03771600  | C        | 1.06144400  | -3.30498500 | -2.36998800 | F         | -2.23506400 | 0.95597000  | 1.34518200  |
| H         | 6.54366000  | 1.72065800   | -1.90051900  | H        | 1.85323900  | -1.30230700 | -2.24907400 | H         | -0.14039700 | 1.75093900  | 0.15393300  |
| H         | 8.78231200  | 0.69548800   | -2.16248400  | H        | 0.00173800  | -5.18038100 | -2.35318000 |           |             |             |             |
| H         | 9.19102400  | -1.61745200  | -1.36168300  | H        | 1.98025100  | -3.73373500 | -2.75783400 | <b>5g</b> |             |             |             |
| C         | 4.32320700  | 0.62014700   | -0.74236000  | C        | -3.12142200 | 2.93048700  | -0.59333900 | C         | 8.27614300  | 0.44824500  | -1.87165900 |
| H         | 4.16203900  | 1.43927800   | -1.44964900  | O        | -3.45552000 | 2.26106200  | 0.54936000  | C         | 7.01553500  | 0.51572600  | -1.28752400 |
| H         | 3.54595300  | -0.13162900  | -0.91211700  | C        | -2.29474400 | 4.18680400  | -0.34999400 | C         | 6.79744000  | 1.30530100  | -0.15524500 |
| C         | 4.18824900  | 1.14851900   | 0.69458700   | O        | -3.53984600 | 2.58440700  | -1.66354600 | C         | 7.86476900  | 2.02353900  | 0.38369600  |
| H         | 4.85929800  | 2.00498200   | 0.84079800   | F        | -1.91257000 | 1.26860600  | 2.31899100  | C         | 9.12845800  | 1.95898600  | -0.19912000 |
| H         | 4.45329600  | 0.38090100   | 1.42280600   | H        | -4.75591600 | -0.02781900 | 1.61608800  | C         | 9.33639200  | 1.17096800  | -1.32751000 |
| C         | 2.79949800  | 1.59830600   | 1.02812800   | F        | -3.83262300 | -0.16734500 | 2.86715100  | H         | 8.43137900  | -0.16431000 | -2.75426400 |
| O         | 2.21134100  | 1.47771300   | 2.05728200   | C        | -1.22642700 | 4.27638000  | -1.44404400 | H         | 6.18308100  | -0.04271300 | -1.71123200 |
| O         | 2.68307500  | -1.41325800  | 0.95539700   | H        | -1.68793600 | 4.22566200  | -2.43294800 | H         | 7.70374600  | 2.64405800  | 1.26211200  |
| C         | 1.56912200  | -1.82790500  | 1.23856300   | H        | -0.68199300 | 5.22181500  | -1.35260200 | H         | 9.94925100  | 2.52734900  | 0.22689700  |
| C         | 0.85330000  | -1.33742200  | 2.44457000   | H        | -0.51682300 | 3.44980100  | -1.35521300 | H         | 10.31976400 | 1.12209200  | -1.78403400 |
| C         | 0.88786200  | -2.83039100  | 0.38213400   | C        | -3.28847000 | 5.35450800  | -0.50150100 | C         | 5.43202100  | 1.32768000  | 0.48743800  |
| C         | -0.38438300 | -1.75978600  | 2.72588600   | H        | -4.07388700 | 5.30428000  | 0.25991300  | H         | 5.30323200  | 2.23657000  | 1.08354000  |
| H         | 1.37628200  | -0.60104200  | 3.04560400   | H        | -2.75721500 | 6.30447300  | -0.38331600 | H         | 4.65613000  | 1.32241100  | -0.28296800 |
| C         | -0.34647700 | -3.25783400  | 0.66766900   | H        | -3.75743100 | 5.33361200  | -1.48887100 | C         | 5.24426600  | 0.09499000  | 1.37758100  |
| H         | 1.44278300  | -3.16658100  | -0.488835100 | C        | -1.65971200 | 4.23720900  | 1.04119200  | H         | 5.91981500  | 0.12316100  | 2.24201000  |
| C         | -1.07823100 | -2.75748100  | 1.86442300   | H        | -2.41276300 | 4.16062500  | 1.83039700  | H         | 5.47545900  | -0.82440300 | 0.83194500  |
| H         | -0.94948200 | -1.40420400  | 3.58203600   | H        | -0.92825800 | 3.43868900  | 1.18354800  | C         | 3.86019000  | -0.08321700 | 1.90947400  |
| H         | -0.88300200 | -3.97444900  | 0.05234700   | H        | -1.13647500 | 5.19127300  | 1.16032100  | O         | 3.43560100  | -1.04374800 | 2.50098000  |
| O         | -2.19508700 | -0.351316300 | 2.13108300   | H        | -3.08244000 | 0.43447100  | 2.75365900  | O         | 3.28519400  | -0.66576500 | -0.62711300 |
| I         | -4.01619700 | -2.26026100  | -1.01614100  | F        | -5.15175900 | 0.20284900  | 0.77085800  | C         | 2.23320800  | -1.23311800 | -0.88391900 |
| C         | -2.17035100 | -1.26728700  | -1.11101100  | H        | -4.10038800 | 1.55024600  | 0.32202000  | C         | 1.65511100  | -2.22853900 | 0.05163000  |
| C         | -1.80022800 | -0.41383300  | -0.07256100  | F        | -0.92156600 | 1.43156700  | -0.10401100 | C         | 1.49716100  | -0.95305700 | -2.14133100 |
| C         | -1.32641300 | -1.48339500  | -2.19957800  | H        | -2.20355400 | 1.61846800  | 1.46287900  | C         | 0.44682400  | -2.75800200 | -0.15971400 |
| C         | -0.56473500 | 0.22958100   | -0.12876900  | F        | 1.94654400  | 1.00588700  | -1.21182400 | H         | 2.26268200  | -2.49194400 | 0.91202100  |
| H         | -2.45785800 | -0.26861900  | 0.77716400   | H        | -0.04407000 | 1.73347600  | 1.04088800  | C         | 0.30180000  | -1.50610200 | -2.37565700 |
| C         | -0.09396200 | -0.83681500  | -2.24087400  |          |             |             |             | H         | 1.96910100  | -0.25705800 | -2.82715900 |
| H         | -1.62682100 | -2.14735600  | -3.00291200  | <b>5</b> |             |             |             | C         | -0.33399200 | -2.38529300 | -1.36694900 |
| C         | 0.28975100  | 0.01855000   | -1.20917700  | C        | -7.94097700 | 0.18288600  | -1.35313500 | H         | 0.00127500  | -3.48663300 | 0.50329200  |
| H         | -0.26839800 | 0.89749900   | 0.67629200   | C        | -6.64475000 | 0.13590100  | -0.85065900 | H         | -0.28699000 | -1.29831200 | -3.26377700 |
| H         | 0.56711500  | -1.00069900  | -3.08653400  | C        | -6.29862600 | 0.85728100  | 0.29537400  | O         | -1.48011900 | -2.78349200 | -1.53622800 |
| H         | 1.24218900  | 0.53468000   | -1.25543400  | C        | -7.27413300 | 1.62898400  | 0.92673800  | I         | -3.64921500 | -0.06125200 | -1.87872600 |
| C         | -3.08311200 | 2.71125000   | -0.11192000  | C        | -8.57367200 | 1.67796800  | 0.42702700  | C         | -1.78616200 | 0.63122300  | -1.22242300 |
| O         | -2.37997900 | 2.68738000   | 1.06393500   | C        | -8.90945800 | 0.95519100  | -0.71415300 | C         | -1.28479100 | 0.17945500  | -0.00363300 |
| C         | -2.55500700 | 3.75225900   | -1.08377800  | H        | -8.19778100 | -0.38626300 | -2.24117200 | C         | -1.08810400 | 1.56899400  | -1.98698500 |
| O         | -3.99427800 | 1.95282200   | -0.29212300  | H        | -5.88554400 | -0.46860600 | -1.34311100 | C         | -0.06374300 | 0.67462700  | -0.45214500 |
| F         | 2.20263700  | 2.22175700   | -0.00701600  | H        | -7.01540500 | 2.19103900  | 1.82106200  | H         | -1.83353900 | -0.54060200 | 0.58683500  |
| H         | -1.45157200 | 0.94361800   | 3.04308200   | H        | -9.32402700 | 2.27865000  | 0.93161700  | C         | 0.12894100  | 2.05421800  | -1.51969700 |
| F         | -0.04533900 | 1.42705100   | 3.37820700   | H        | -9.92204700 | 0.99044600  | -1.10326900 | H         | -1.49779500 | 1.92187800  | -2.92781700 |
| H         | -0.87735200 | 3.04375100   | 1.30130600   | C        | -4.87534900 | 0.82551200  | 0.79565900  | C         | 0.64570700  | 1.60610200  | -0.30331900 |
| C         | -1.23132900 | 3.21925600   | -1.66203200  | H        | -4.83534600 | 1.09709500  | 1.85534300  | H         | 0.32805500  | 0.32633200  | -1.04283500 |
| H         | -1.38089700 | 2.25941600   | -2.16676400  | H        | -4.46569700 | -0.18321400 | 0.69406300  | H         | 0.67319100  | 2.78794300  | -2.10658200 |
| H         | -0.84776400 | 3.94023700   | -2.39152900  | C        | -4.00162500 | 1.78493500  | -0.01807000 | H         | 1.59686400  | 1.98496500  | 0.05551500  |
| H         | -0.47329500 | 3.08724000   | -0.88346300  | H        | -4.30029500 | 2.82807400  | 0.14385000  | C         | -4.76350900 | 1.99558000  | 1.03637500  |
| C         | -3.58468000 | 3.93039600   | -2.19896800  | H        | -4.10350800 | 1.59338300  | -1.09017100 | O         | -3.84473200 | 1.11534500  | 1.46091100  |
| H         | -4.53396600 | 4.30113800   | -1.80144500  | C        | -2.53697900 | 1.69185600  | 0.27160500  | C         | -4.25544300 | 3.43152400  | 1.10706500  |
| H         | -3.20907300 | 4.65029400   | -2.93253900  | O        | -1.64859400 | 2.23859700  | -0.32217100 | O         | -5.85752500 | 1.66697800  |             |

F -0.89821900 -1.78152300 2.33299700  
H -1.14383400 -3.37689100 2.35306500  
F 1.09091500 -0.75275200 3.40332800  
H -0.12110100 -1.44435900 2.79172400  
F 3.05618900 0.96115900 1.73793200  
H 1.98460900 -0.91347000 3.05312700

**IM1-1**

I 2.07286100 0.10031600 -0.90579100  
C 3.95689400 -0.20380900 -0.02493100  
C 6.42329400 -0.62518000 1.11105400  
C 5.07445600 0.33540800 -0.64875300  
C 4.02589300 -0.94741800 1.14465700  
C 5.28359900 -1.15599300 1.70929500  
C 6.31898500 0.12010300 -0.06157800  
H 4.97963900 0.90833000 -1.56461100  
H 3.12493700 -1.32770800 1.61307600  
H 5.36371700 -1.72716500 2.62850200  
H 7.20763000 0.52765100 -0.53255900  
H 7.39708700 -0.79179100 1.55993400  
O 1.38465600 0.16286000 2.31821600  
O 0.08616100 0.09246800 1.93187100  
C -2.56094200 -0.17786700 1.13268500  
C -0.62018300 1.20544800 1.47030700  
C -0.54235800 -1.15393900 1.98601400  
C -1.86489300 -1.29455700 1.58762100  
C -1.94659900 1.06478900 1.07202300  
H -0.12720500 2.17223500 1.42531200  
H 0.02708400 -2.00810000 2.33692900  
H -2.35495800 -2.25929900 1.63470900  
H -2.51384300 1.91585400 0.70967300  
O 2.71269800 2.11712500 -1.13292800  
C 2.76595600 2.85066200 -0.04033700  
O 2.42805500 2.45585600 1.06839100  
C 3.32256700 4.25447300 -0.27905400  
O 1.66180000 -1.87795300 -0.48689500  
C 2.35051800 -2.80611900 -1.16558100  
O 3.16518300 -2.53572300 -2.01871300  
C 2.01357400 -4.22258800 -0.70133600  
H 1.76367000 1.02163600 2.03864900  
C 2.73423400 -5.22400300 -1.60170100  
H 2.51013900 -6.24413400 -1.27299200  
H 2.41524000 -5.11412000 -2.64192100  
H 3.81594300 -5.07168600 -1.56789300  
C 2.50261200 -4.35813300 0.74945900  
C 3.57655600 -4.15305200 0.82323300  
H 1.96921900 -3.66436700 1.40583000  
H 2.32421300 -5.37882600 1.10392800  
C 0.49494100 -4.43321400 -0.75751500  
H 0.12137200 -4.32894700 -1.78173300  
H 0.25171700 -5.44288400 -0.40984300  
H -0.02421000 -3.70812000 -0.12509100  
C 2.45643300 4.96188200 -1.33025200  
H 1.42396500 5.07011700 -0.98109900  
H 2.85555800 5.96379400 -1.52001000  
H 2.44891900 4.40437000 -2.26998400  
C 4.75795700 4.10222400 -0.80597800  
H 5.37920800 3.54033200 -0.09946600  
H 4.76565500 3.58158100 -1.76746000  
C 5.20598700 5.05206900 -0.94212100  
C 3.31672600 5.03420500 1.03433400  
H 3.71523700 6.04012700 0.86691400  
H 2.30251600 5.12274600 1.43313200  
H 3.92896200 4.53503100 1.78979400  
O -3.86279100 -0.25685000 0.64377100  
C -4.82400000 -0.88302600 1.37497200  
C -6.15058100 -0.79708800 0.65918600  
H -6.88580000 -1.33482100 1.26149600  
H -6.05823300 -1.30466100 -0.30778700  
C -6.59591400 0.65726600 0.42211100  
H -6.66709900 1.17291000 1.38643600  
H -5.82957200 1.17019100 -0.16657800  
C -7.92501200 0.79250100 -0.29043600  
C -7.98147600 0.72909900 -1.68571200  
C -9.12200500 0.67557500 0.42833500  
C -9.20515300 0.72507300 -2.34931700  
H -7.05524900 0.75492400 -2.25528200  
C -10.34821400 0.67172800 -0.23055600  
H -9.08992800 0.65886700 1.51537600  
C -10.39269900 0.69647000 -1.62242600  
H -9.23131200 0.74815500 -3.43443500  
H -11.26956900 0.65249800 0.34333700  
H -11.34798500 0.69623300 -2.13768800  
O -4.62828300 -1.41616300 2.43296400

**IM1-2**

I 1.25731900 -0.02773000 0.67948200  
C 2.99800500 1.12560000 0.86794900  
C 5.33833500 2.55914900 1.06964900  
C 3.83953500 0.88049800 1.94626100  
C 3.29248400 2.05826700 -0.11698100  
C 4.47743100 2.78175000 -0.00238500  
C 5.02213800 1.61095900 2.03979200  
H 3.58882400 0.12989500 2.68881400  
H 2.62203700 2.20890400 -0.95574900  
H 4.73059300 3.51063200 -0.76508000  
H 5.69191900 1.43800200 2.87606600  
H 6.26159100 3.12408600 1.14737200  
O 3.16638900 0.38835900 -2.97824800  
C 1.85487600 0.07083400 -2.82252800  
C -0.83168400 -0.47227800 -2.30145100

C 1.41955500 -1.25290300 -2.68922300  
C 0.91679700 1.09988600 -2.78452200  
C -0.42935000 0.84144100 -2.52974500  
C 0.08705000 -1.51766800 -2.41606500  
H 2.14110200 -2.06073200 -2.75182400  
H 1.25469700 2.12043400 -2.93787200  
H -1.14071700 1.65065900 -2.48962400  
H -0.26342700 -2.53378000 -2.26686300  
O 2.53712400 -1.69830900 1.00296700  
C 3.52930100 -1.92875600 0.16713000  
O 3.75217700 -1.25810400 -0.82865800  
C 4.41526200 -3.10129500 0.59387400  
O 0.35527500 1.85966800 0.54731300  
C -0.96385100 1.78877000 0.62621300  
O -1.55172300 0.71806700 0.67833000  
C -1.63211100 3.16305400 0.67808000  
H 3.68029600 -0.24735800 -2.44676800  
O -2.09730100 -0.89091400 -1.92306200  
C -3.12497600 -0.06795200 -1.62850300  
O -3.15709300 1.11565800 -1.85595000  
C -4.25311100 -0.86083100 -1.01049200  
H -4.85602300 -1.27994400 -1.82684300  
H -3.83411400 -1.70734500 -0.46041300  
C -5.12304200 0.00988000 -0.10105100  
H -4.49429600 0.39604300 0.70815900  
H -5.48121500 0.87254900 -0.67205900  
C -6.28189100 -0.77597000 0.46005900  
H -7.49435000 -0.85157500 -0.22954100  
C -6.14813600 -1.48488000 1.65618400  
H -8.54937300 -1.61422000 0.26364400  
H -7.61148400 -0.30094900 -1.16025300  
H -7.20007200 -2.24885700 2.15405900  
C -5.20921900 -1.43057800 2.20246200  
C -8.40466400 -2.31566700 1.45822900  
H -9.48658700 -1.65757500 -0.28283400  
H -7.08043600 -2.78950600 3.08803400  
H -9.22715200 -2.90833400 1.84620900  
C -3.12779800 3.00003100 0.93585400  
H -3.31092300 2.45909400 1.86964200  
H -3.59402100 3.98830800 1.01100900  
C -3.59800600 2.45192100 0.11650100  
C -0.97445900 3.97178300 1.80663400  
H 0.09089400 4.12031100 1.61508100  
H -1.45926500 4.95071800 1.88134100  
H -1.08551600 3.46475700 2.77139500  
H -1.40701500 3.87065300 -0.66696900  
C -1.96106200 3.36466100 -1.46299400  
H -1.77440200 4.90041000 -0.59979100  
H -0.34367600 3.89813800 -0.92468900  
C 5.47175100 -3.35463500 -0.47985600  
H 6.09301800 -2.46895600 -0.63532900  
H 6.11490300 -4.18701700 -0.17612600  
H 5.00566200 -3.60729300 -1.43650900  
C 5.08585600 -2.70931400 1.91985200  
H 4.33739300 -2.55224400 2.70163600  
H 5.76334900 -3.50740600 2.24129400  
H 5.67133600 -1.78986900 1.80533700  
C 3.54526500 -4.34782800 0.79913400  
H 4.17382600 -5.18741700 1.11426000  
H 2.78518600 -4.17252200 1.56403100  
H 3.04164700 -4.63331900 -0.13079500

**IM1-3**

I -2.19756300 -0.23193300 -0.94850200  
C -4.05552400 0.16353200 -0.04644000  
C -6.48736100 0.70601000 1.11319000  
C -5.19203400 -0.42744600 -0.58307400  
C -4.08938500 1.01808500 1.04633000  
C -5.32961100 1.28655500 1.62403000  
C -6.41857800 -0.14958100 0.01571800  
H -5.12541300 -1.08683200 -1.44135300  
H -3.17522700 1.43991300 1.44835800  
H -5.38135400 1.94525800 2.48483800  
H -7.32138800 -0.59581300 -0.38855400  
H -7.44738100 0.92038200 1.57133500  
O -1.46166800 -0.05937500 2.25944200  
O -0.16962600 -0.02926900 1.85247200  
C 2.46265800 0.15799400 1.00436000  
C 0.52483700 -1.18283800 1.47795800  
C 0.46628500 1.21307200 1.79314800  
C 1.78385300 1.31701100 1.36593500  
C 1.84570800 -1.08362700 1.05270600  
H 0.02611700 -2.14665400 1.51953500  
H -0.09124400 2.09866400 2.07882300  
H 2.26787600 2.28547000 1.33477700  
H 2.40458100 -1.96490400 0.75535600  
O -2.86718900 -2.25498900 -1.00935900  
C -2.89463600 -2.90493100 1.13504100  
O -2.52325100 -2.43228800 1.20229900  
C -3.46555000 -4.31849900 0.01761100  
O -1.74530300 1.76028400 -0.68285500  
C -2.42564000 2.65173400 -1.41938900  
O -3.26002900 2.33503000 -2.23642900  
C -2.04935400 0.09038400 -1.06880300  
H -1.85160700 -0.93376200 2.05130900  
C -2.76242800 5.03683500 -2.03259000  
H -2.51036200 6.07332700 -1.78573900  
H -2.46256400 4.84107400 -3.06587000  
H -3.84660800 4.91282300 -1.97173800  
C -2.51214600 4.34777800 0.37421400  
H -3.58909500 4.17399800 0.47939000

H -1.98246400 3.69573400 1.07484000  
H -2.30516800 5.38813400 0.64592600  
C -0.52744700 4.26124400 -1.16216700  
H -0.17215600 4.06808900 -2.18001800  
H -0.25698200 5.28907200 -0.89863100  
H -0.01291800 3.57867200 -0.48065500  
C -3.42886200 -4.99752600 1.38526300  
H -4.01693700 -4.43793100 2.11720500  
H -3.83829000 -6.00973700 1.30477100  
H -2.40472300 -5.06452300 1.76233700  
C -2.63206300 -5.10943400 -0.99989900  
H -2.64675000 -4.62409200 -1.97878500  
H -1.59115600 -5.19902300 -0.67101900  
H -3.04168700 -6.11970000 -1.10317500  
C -4.91375400 -4.19577500 -0.48118700  
H -5.37092900 -5.18963100 -0.52911200  
H -5.51259400 -3.57682200 0.19643400  
H -4.94455300 -3.75036800 -1.47934600  
O 3.76638800 0.17482100 0.49327500  
C 4.75319000 0.82431600 1.12934400  
C 6.07056700 0.61558100 0.42644400  
H 6.83269800 1.16646400 0.98117900  
H 5.99580400 1.04848100 -0.57772700  
C 6.44513100 -0.87298100 0.30626400  
H 6.49522500 -1.31349600 1.30838200  
H 5.65400600 -1.39418300 -0.24081300  
C 7.76845800 -1.03890700 -0.39966100  
C 7.81820600 -1.17995800 -1.78809100  
C 8.96758800 -1.00220800 0.31505200  
C 9.03867200 -1.28555400 -2.44926900  
H 6.88994500 -1.21197900 -2.35400400  
C 10.19041400 -1.10756300 -0.34168500  
H 8.94027300 -0.8944980 1.39701400  
O 10.22861900 -1.2495990 -1.72669300  
H 9.06015300 -1.3997190 -3.52864200  
H 11.1367800 -1.0818470 0.22873600  
H 11.18111200 -1.3345750 -2.24004000  
O 4.60662700 1.47816700 2.13712900  
F 3.38716100 3.81702100 2.33661500  
H 3.83880200 3.00393800 2.49099000

**IM1-4**

I -2.37419700 -0.04603300 -1.05059000  
C -4.13077800 0.56866600 -0.07010100  
C -6.42742700 1.40008400 1.18967500  
C -5.35482100 0.232321500 -0.62809300  
C -4.01169300 1.31727900 1.09214100  
C -5.18444100 1.73429700 1.72031300  
C -6.51229800 0.64533800 0.10216700  
H -5.40720900 -0.35991200 -1.54079900  
H -3.03667700 1.54432600 1.50778200  
H -5.11777400 2.31350400 2.63552300  
H -7.48049700 0.39129300 -0.39741600  
H -7.33399600 1.72813400 1.68765300  
H -1.62673300 -0.30935800 2.15188400  
C -0.33501200 -0.40438400 1.78884300  
C 2.31163200 -0.47610600 0.96072000  
C 0.19631000 -1.57582100 1.20962400  
C 0.47205100 0.72738700 1.90329000  
C 1.80186500 0.69477200 1.50660300  
C 1.52875700 -1.60955900 0.80918800  
H -0.43828900 -2.45053400 1.10092600  
H 0.03787900 1.62556000 2.32916700  
H 2.45233800 1.55507000 1.61390600  
H 1.96101300 -2.50735400 0.37971000  
O -3.38057000 -1.90884800 -1.29172600  
C -3.49361300 -2.66426300 -0.21935900  
C -3.02337500 -2.37741200 0.87475900  
C -4.29789800 -3.94239900 -0.45780400  
O -1.57580100 1.80167900 -0.60549500  
C -2.09562300 2.86549700 -1.23619200  
O -2.98353000 2.78092500 -2.05370600  
H -1.46475900 4.17526700 -0.76020600  
H -2.12847800 -1.09258000 1.84298700  
C -2.00667800 3.51984800 -1.62000300  
H -1.57171600 6.26748600 -1.28594300  
H -1.75605400 5.17306200 -2.67428700  
H -3.09495200 5.38388800 -1.54265400  
H -1.85977400 4.37211800 0.70629500  
H -2.94927800 4.38262400 0.82389700  
H -1.44831600 3.57207800 1.32874600  
H -1.46774000 5.32881800 1.06715100  
C 0.06215000 4.08206400 -0.88350100  
H 0.36765000 3.92343000 -1.92315900  
H 0.51380600 5.01784000 -0.53763200  
H 0.45270300 3.25902600 -0.27904700  
C -4.35490900 -4.75611500 0.83356800  
H -4.82958100 -4.18591200 1.63627000  
H -4.92988900 -5.67255000 0.66575700  
C -3.35103200 -5.03045000 1.16876900  
C -3.62583400 -4.75124500 -1.57586600  
H -3.57234600 -4.17097800 -2.50023700  
H -2.61068300 -5.04790500 -1.29112500  
H -4.20280600 -5.66215800 -1.76657900  
H -5.71210000 -3.52922900 -0.89420600  
H -6.33143800 -4.42277000 -1.02451700  
H -6.18697400 -2.89192000 -0.13973800  
H -5.68312400 -2.98520300 -1.84227100  
O 3.63561100 -0.49352400 0.50023400  
C 4.59755500 -0.79629500 1.37543100  
C 5.97838800 -0.68988500 0.79248300

H 6.60228200 -1.43653400 1.29157500  
H 6.33878600 0.29424400 1.11842900  
C 6.06583800 -0.80897900 -0.73268800  
H 5.65293800 -1.77262900 -1.05052900  
H 5.44715400 -0.03077300 -1.18852000  
C 7.49707500 -0.68051400 -1.19539200  
C 8.06168800 0.58008900 -1.40471800  
C 8.29671700 -1.81089500 -1.37354600  
C 9.39350700 0.70870200 -1.78726700  
H 7.44739700 1.46742500 -1.26933100  
C 9.62972500 -1.68753700 -1.75676500  
H 7.86759800 -2.79754000 -1.21447300  
C 10.18156600 -0.42626600 -1.96480100  
H 9.81560200 1.69553700 -1.95037800  
H 10.23641600 -2.57708700 -1.89566300  
H 11.21968800 -0.32791200 -2.26600300  
O 4.38286400 -1.11596400 2.53005100  
F 4.63202300 1.79404700 2.17967000  
H 4.21726900 1.49339600 2.98397900  
F 3.36056800 0.62718500 4.02062700  
H 3.52669600 -0.19612300 3.54771300

IM1-5

I -2.55987500 0.20639800 -1.09695100  
C -4.15252900 0.80411100 0.14068900  
C -6.23486400 1.61509400 1.74049700  
C -5.45033100 0.63242700 -0.32316600  
C -3.85647800 1.36950700 1.37279200  
C -4.92188800 1.77830400 2.17381600  
C -6.49806000 1.04211000 0.49815100  
H -5.64164000 0.19041900 -1.29468300  
H -2.82980700 1.46419500 1.70738600  
H -4.71653400 2.2154100 3.14557200  
H -7.52074500 0.92206100 0.15565800  
H -7.05669000 1.93527400 2.37256800  
O -1.53586300 -0.56964200 1.93140900  
C -0.30898100 -0.74182400 1.38949400  
C 2.22115500 -0.98112800 0.30881300  
C 0.03441200 -1.88795000 0.66497400  
C 0.62382100 0.28562700 1.55811800  
C 1.89691500 0.16710800 1.01957700  
C 1.31000700 -2.00822700 0.12246700  
H -0.69897500 -2.67877200 0.53838100  
H 0.33283600 1.16846400 2.11718800  
H 2.64747400 0.93753600 1.15311700  
H 1.60017400 -2.89272200 -0.43536700  
O -3.74576300 -1.52142100 -1.47903700  
C -3.83247900 -2.40873700 -0.51029100  
O -3.24780400 -2.31305600 0.56189600  
C -4.76313600 -3.37666500 -0.83699500  
O -1.56266600 1.90765700 -0.49374200  
C -2.04653200 3.08605700 -0.91489900  
O -3.01153800 3.18404500 -1.63799500  
C -1.26454400 4.26597500 -0.33971100  
H -2.14792600 -1.25788900 1.59613200  
C -1.78550800 5.55755000 -0.96704400  
H -1.24115400 6.41360100 -0.55518100  
H -1.65029500 5.54690200 -2.05215500  
H -2.85191800 5.68711100 -0.76607000  
C -1.49974100 4.27596800 1.17919000  
H -2.56839700 3.34525600 1.41178400  
H -1.09960800 3.36834600 1.64063700  
H -0.99655400 5.14127700 1.62322700  
C 0.23064000 4.08264900 -0.63069000  
H 0.42123900 4.05708900 -1.70882400  
H 0.79185900 4.92267800 -0.20803700  
O 0.60447000 3.15383100 -0.19170000  
C -4.77325100 -4.56141500 0.33056400  
H -5.12062900 -4.07927500 1.24794500  
H -5.43928000 -5.39905300 0.09950500  
H -3.77094700 -4.95498200 0.52031300  
C -4.26961000 -4.26349700 -2.11784000  
H -4.25088300 -3.56208200 -2.95549400  
H -3.26230800 -4.67162100 -1.98220200  
H -4.93871800 -5.09283300 -2.36983000  
C -6.16953600 -3.00114900 -1.06524100  
H -6.87428400 -3.81810800 -1.25196500  
H -6.51553000 -2.44626000 -0.18586700  
H -6.17959400 -2.32949600 -1.92808800  
O 3.51185700 -1.08178500 -0.23002400  
C 4.43975500 -1.66702700 0.52481300  
C 5.83153100 -1.54077100 -0.02233900  
H 6.09767500 -2.19480100 -0.49998700  
H 6.47695600 -1.43719200 0.85352800  
C 6.03101700 -0.36391100 -0.98520400  
H 5.55599100 -0.58199000 -1.94645100  
H 5.52994200 0.51145200 -0.56373000  
C 7.49992500 -0.07145600 -1.16697600  
C 8.18810800 0.61859500 -0.16395100  
C 8.20250800 -0.50342200 -2.29133200  
C 9.54973100 0.87319700 -0.28521600  
H 7.63746500 0.95625400 0.71208400  
C 9.56713300 -0.24970300 -2.41668800  
H 7.67524400 -1.03827200 -3.07781000  
C 10.24342800 0.44882600 -1.41399100  
H 10.07076400 1.41443800 0.49856400  
H 10.10071400 -0.58833100 -3.29956300  
H 11.30579600 0.63915900 -1.51143000  
O 4.18927100 -2.27727500 1.55300100  
F 4.91641100 0.55911300 1.71222900  
H 4.37674700 0.41098800 2.49181200

IM1-6

I -2.56519200 0.06174500 -1.17457400  
C -4.20766500 0.75650600 -0.05872400  
C -6.35450100 1.69195400 1.37969900  
C -5.48555800 0.53356000 -0.55497000  
C -3.96246000 1.43343100 1.12743800  
C -5.06017500 1.90421500 1.84665700  
C -6.56642100 1.00737500 0.18493600  
H -5.63669500 0.00458600 -1.48941000  
H -2.95000900 1.56720200 1.49080400  
H -4.89486400 2.42904100 2.78193500  
H -7.57439800 0.84905400 -0.18455900  
H -7.20177500 2.06116100 1.94825000  
O -1.64777800 -0.42349200 1.94458800  
C -0.41275200 -0.66872300 1.45189200  
C 2.13471100 -1.05825200 0.46125600  
C -0.06091000 -1.90307100 0.89667400  
C 0.52056200 0.37188600 1.49391200  
C 1.80072500 0.17980300 0.99462400  
C 1.22475300 -2.10009000 0.40198500  
H -0.79549600 -2.70195700 0.86432100  
H 0.22648500 1.32262200 1.92516200  
H 2.54396400 0.96775900 1.01979000  
H 1.52310300 -3.05381700 -0.02058800  
O -3.72383800 -1.70791500 -1.43555100  
C -3.85193800 -2.49448500 -0.38790700  
O -3.31661600 -2.28832100 0.69465800  
C -4.76407300 -3.69588000 -0.63660100  
O -1.60315600 1.81998200 -0.69441900  
C -2.07593700 2.94992900 -1.24316100  
O -3.01417100 2.97083700 -2.00660600  
C -1.31905000 4.18447100 -0.75630000  
H -2.26155800 -1.13635600 1.66878700  
H -1.82928500 5.40820700 -1.51481300  
H -1.30219000 6.30313200 -1.16838200  
H -1.66259800 5.28901100 -2.59002200  
H -2.90185400 5.54670900 -1.35692000  
C -1.59805400 4.33257900 0.74789600  
H -2.67331000 4.41557600 0.94254900  
H -1.20754500 3.47462700 1.30300900  
H -1.11162200 5.23856100 1.12414000  
O 0.18501300 3.98808900 -0.98728300  
H 0.40668600 3.86569200 -2.05275100  
H 0.72904600 4.86762400 -0.62742100  
H 0.55207500 3.10668600 -0.45452900  
C -4.82330900 -4.55933800 0.62197400  
H -5.21253200 -3.99059400 1.47036200  
H -5.47615600 -5.42056700 0.44674700  
H -3.82943300 -4.92497200 0.89408100  
C -4.21287500 -4.50338700 -1.81968700  
H -4.15911300 -3.88864900 -2.72143900  
H -3.21139800 -4.88891400 -1.60044100  
H -4.86800400 -5.35840100 -2.01666400  
C -6.16067300 -3.15595900 -0.98212500  
H -6.85417700 -3.99241900 -1.11752600  
H -6.54677500 -2.51933500 -0.17802300  
H -6.13438900 -2.57306100 -1.90690000  
O 3.43285500 -1.24950900 -0.03542100  
C 4.39509500 -1.47268400 0.85375100  
C 5.77532300 -1.49825200 0.26682600  
H 6.09672400 -2.54587200 0.21407500  
H 6.41322400 -1.01056200 1.00793400  
C 5.90308000 -0.80977200 -1.09721700  
H 5.45024800 -1.43210300 -1.87511100  
H 5.34389200 0.12856700 -1.06172800  
C 7.35087400 -0.52578500 -1.41341800  
C 7.98908000 0.54478100 -0.77887000  
C 8.08245400 -1.32141700 -2.29410900  
C 9.33103400 0.81435100 -1.02353500  
H 7.41393000 1.16414700 -0.09326500  
C 9.42762700 -1.05369300 -2.54203500  
H 7.59360400 -2.15412800 -2.79424400  
C 10.05445000 0.01433100 -1.90727900  
H 9.81339700 1.65166500 -0.52856000  
H 9.98440900 -1.67896700 -3.23331300  
H 11.10138200 0.22538300 -2.10138200  
O 4.18552600 -1.67478600 2.04274500  
F 4.91512300 1.05127000 1.04892400  
H 4.47020400 1.45472500 1.79618100  
F 2.14538500 -1.65140500 3.38643800  
C 2.92943300 -1.70211800 2.76998300  
F 3.52249100 2.09868600 2.82809600  
C 2.95615300 1.48928900 3.34465100  
F 2.05504000 0.63858700 4.08592000  
H 2.04910300 -0.30927800 3.79957500

IM1-7

I -2.49252900 -0.33945700 -1.13384500  
C -4.24095200 0.38883700 -0.21448900  
C -6.52523100 1.37073600 0.95801400  
C -5.47042700 -0.05851600 -0.68056500  
C -4.11127500 1.31280000 0.81265600  
C -5.27725900 1.80392100 1.39773800  
C -6.62113200 0.44173600 -0.07553700  
H -5.53219000 -0.77760700 -1.48965300  
H -3.13292600 1.62226700 1.16087800

H -5.20095000 2.52136700 2.20821900  
H -7.59317400 0.10975600 -0.42563400  
H -7.42651300 1.75857900 1.42135700  
O -1.82750500 -0.26984800 2.10838000  
C -0.54664500 -0.43108600 1.70361900  
C 2.06404600 -0.63381800 0.82696400  
C 0.04495500 -1.68992600 1.56691800  
C 0.18073200 0.72153400 1.39513100  
C 1.48905100 0.62327400 0.94612800  
C 1.36286700 -1.79000100 1.12974500  
H -0.53124800 -2.58036000 1.79850900  
H -0.30637300 1.68602000 1.47692400  
H 2.06783600 1.49884200 0.68667600  
H 1.84473300 -2.75622400 1.02112600  
O -3.49672400 -2.21866100 -1.16240000  
C -3.59481600 -2.87031400 -0.02245500  
O -3.13261400 -2.47267100 1.03924000  
C -4.37182100 -4.18226000 -0.13916300  
O -1.68702800 1.54168000 -0.91235900  
C -2.16354700 2.53118100 -1.68500600  
O -3.05165700 2.37074600 -2.48995100  
C -1.47795600 3.86460600 -1.37860200  
H -2.33075000 -1.09267400 1.93662300  
C -1.94374900 4.89704600 -2.41235500  
H -1.46575500 5.86060600 -2.20800200  
H -1.68172000 4.58587000 -2.04355900  
H -3.02845100 5.02529900 -2.37297200  
C -1.89645700 4.29144700 0.02903600  
H -2.98727700 4.34917300 1.11758100  
H -1.51488600 3.59296700 0.77886700  
H -1.48107100 5.28036600 0.24945900  
C 0.04424400 3.68593300 -1.44108300  
H 0.37421300 3.39335100 -2.44359700  
H 0.53746300 4.63002800 -1.18617800  
H 0.37046100 2.92036200 -0.73379300  
C -4.41550900 -4.87061700 1.22366200  
H -4.90471800 -4.23706900 1.96806000  
H -4.97026000 -5.81108500 1.14340900  
H -3.40695600 -5.09031000 1.58429600  
C -3.67996100 -5.07960000 -1.17448300  
H -3.63648200 -4.58909700 -2.14993900  
H -2.65938400 -5.32573700 -0.86235200  
H -4.23683900 -6.01678700 -1.27785300  
C -5.79344400 -3.84335700 -0.61376600  
H -6.39395500 -4.75797500 -0.65673300  
H -6.28320900 -3.14612600 0.07546700  
H -5.77395600 -3.39373300 -1.61032600  
O 3.38416900 -0.73149600 3.59966000  
C 4.36187200 -0.68436100 1.26045700  
C 5.73075500 -0.69647600 0.64757100  
H 6.43321400 -1.02252300 1.41818100  
H 5.95138200 0.35478200 0.42614800  
C 5.85369400 -1.54552200 -0.62050700  
H 5.56908600 -2.58042500 -0.40417400  
H 5.15084600 -1.17222600 -1.37516900  
C 7.26490100 -1.50202100 -1.15911600  
C 7.65991600 -0.48891100 -2.03546300  
C 8.21256400 -2.44161100 -0.74853100  
C 8.97168600 -0.41773700 -2.49523800  
H 6.92939300 0.24750300 -2.20651400  
C 9.52576100 -2.37483000 -1.26589100  
H 7.91555100 -3.23565100 -0.06714900  
C 9.90848200 -1.36178100 -2.08127600  
H 9.26170100 0.37316800 -3.17994600  
H 10.24936500 -3.11600800 -0.88090800  
H 10.93109100 -1.30937800 -2.44114200  
O 4.17714500 -0.64084900 2.46737200  
F 4.31242600 1.93367800 1.16604200  
H 3.87828100 2.62338600 0.67383200  
F 2.23259500 0.10201900 3.73119900  
H 2.97920400 -0.27040800 3.17455200  
F 2.85040900 3.61103300 -0.03208600  
H 2.10697300 3.70156200 0.58865100  
F 2.23402100 2.44772600 3.33776200  
H 2.19304900 1.45782200 3.47340000  
F 1.05536300 3.58838800 1.62079200  
H 1.47752300 3.08089700 2.36839300

IM1-8

I 2.99603100 0.29090800 -1.15016600  
C 4.13333100 0.52147100 0.59986200  
C 5.64819900 0.77195600 2.87254000  
C 5.19547800 1.41488500 0.58875200  
C 3.79880000 -0.25864800 1.69813600  
C 4.58002800 -0.12085700 2.84534600  
C 5.95401500 1.53868200 1.74981600  
H 5.42663000 1.99622800 -0.29758000  
H 2.94757700 -0.93160100 1.66818400  
H 4.33843400 -0.71143900 3.72302900  
H 6.79278900 2.22700600 1.76795000  
H 6.24657900 0.87101800 3.77239800  
O 0.97744000 0.55427900 1.45519800  
C -0.33155800 0.66753400 1.10577700  
C -3.02333300 0.66393000 0.50290200  
C -1.19721600 1.53559700 1.77751000  
C -0.82138900 -0.15012400 0.08664100  
C -2.17521500 -0.15584000 -0.22033900  
C -2.55488500 1.53101700 1.47973700  
H -0.80266400 2.17851500 2.55749500  
H -0.13458000 -0.79569500 -0.44428100  
H -2.57448400 -0.80746100 -0.98641800

H -3.25024200 2.16686000 2.01806100  
O 3.06387400 2.40698600 -1.34157800  
C 2.59083900 3.22575700 -0.42634000  
O 2.03865100 2.87460900 0.60564700  
C 2.84128800 4.69952300 -0.75536400  
O 3.12525200 -1.75722900 -0.81857400  
C 4.35432800 -2.28191000 -0.97649500  
O 5.30921900 -1.61715300 -1.30959400  
C 4.41640400 -3.77506500 -0.65879600  
H 1.41116300 1.43206900 1.38804900  
C 5.84250900 -4.26670900 -0.90313000  
H 5.90440200 -5.33653500 -0.67821300  
H 6.13856500 -4.10961800 -1.94380500  
H 6.55503300 -3.73198200 -0.26982200  
C 4.03578500 -3.96188100 0.81801400  
H 4.70982400 -3.39221200 1.46809500  
H 3.01178200 -3.63468500 1.01088800  
H 4.12271700 -5.02079500 1.08416400  
C 3.43104500 -4.53188900 -1.55942800  
H 3.69879100 -4.41553700 -2.61510900  
H 3.46506600 -5.59963300 -1.31824800  
H 2.40780600 -4.17600500 -1.42598300  
C 2.16735500 5.57573400 0.29897500  
H 2.55863600 5.35995100 1.29636300  
H 2.34780200 6.63119300 0.07031400  
H 1.08774000 5.40280300 0.31939000  
C 2.28624600 5.01154700 -2.15095800  
H 2.76310700 4.38733500 -2.91021600  
H 1.20498700 4.84251000 -2.19094400  
H 2.47347600 6.06297400 -2.39319100  
C 4.36225500 4.92003000 -0.73902000  
H 4.58343400 5.97539500 -0.92979100  
H 4.78621800 4.65477900 0.23634900  
H 4.85122500 4.31807400 -1.51028900  
O -4.39874200 0.58005500 0.23425500  
C -5.13906200 -0.13098300 1.08637000  
C -6.56716400 -0.27467900 0.64320000  
H -7.16644800 -0.47925400 1.53380500  
H -6.59585600 -1.18417200 0.02791600  
C -7.12281600 0.91332000 -0.15279200  
H -7.04894100 1.82313900 0.45327300  
H -6.50691100 1.07085600 -1.04246300  
C -8.55979000 0.66651000 -0.54411200  
C -8.86913600 0.04486000 -1.75558900  
C -9.60187700 1.00827200 0.32043200  
C -10.19068600 -0.22701200 -2.09851200  
H -8.06556200 -0.22330600 -2.43762300  
C -10.92483700 0.73879300 -0.01810800  
H -9.37256800 1.49510500 1.26572400  
C -11.22234500 0.11973800 -1.22974400  
H -10.41485700 -0.70650400 -3.04628500  
H -11.72379300 1.01517200 0.66289500  
H -12.25343900 -0.08894800 -1.49666100  
O -4.71280400 -0.62804700 2.11371200  
F -3.64611800 -2.48802100 0.48825500  
H -2.94692800 -2.77614000 -0.08718100  
F -2.39623900 -1.33433900 2.65072900  
H -2.39916200 -1.04705300 2.35905200  
F -1.92158000 -2.98981600 -1.35246500  
H -0.98415800 -2.93425500 -1.17083800  
F -1.17695600 -2.81605200 1.25052600  
H -1.76939000 -2.20707300 1.78143000  
F 0.60133300 -2.71894800 -1.27584500  
H 1.07864000 -2.55178500 -0.44835100  
F 1.17619300 -2.31053000 1.08334500  
H 0.23549400 -2.45745300 1.31211300

IM1-9

I 2.45819500 0.48587100 -1.18065900  
C 4.34833600 0.05676000 -0.36293900  
C 6.80855300 -0.51079000 0.71887800  
C 5.46145900 0.71178200 -0.87353100  
C 4.41746800 -0.87114700 0.66533100  
C 5.67238200 -1.15174000 1.20465600  
C 6.70311600 0.41794700 -0.31476900  
H 5.36660200 1.43065100 -1.67968000  
H 3.52823300 -1.36098300 1.04532900  
H 5.74879500 -1.86933000 2.01497700  
H 7.58945700 0.91125300 -0.70030200  
H 7.78057300 -0.73504300 1.14575500  
O 1.45312100 0.46564700 2.10365600  
C 0.22126500 0.59519900 1.49639500  
C -2.27269500 0.73546000 0.36324100  
C -0.49021800 1.78499200 1.57233900  
C -0.28403000 -0.50808800 0.81288200  
C -1.53652100 -0.43600900 0.22866000  
C -1.76215200 1.85213400 1.00393800  
H -0.06456700 2.63280400 2.09869800  
H 0.31336300 1.40983100 0.74379100  
H -1.96173200 -1.27628000 -0.30386300  
H -2.36678400 2.74892300 1.08243800  
O 3.11188600 2.52048800 -1.11410900  
C 3.14463200 3.10261900 0.06158600  
O 2.79250700 2.56868300 1.10973700  
C 3.69606100 4.52753900 0.02397800  
O 2.00551800 -1.51169000 -1.00452000  
C 2.62982400 -2.37422900 -1.82771500  
O 3.42426400 -2.01561800 -2.66537800  
C 2.24850600 -3.82298600 -1.53500400  
H 2.05559000 1.20110500 1.82366700  
C 2.83509500 -4.71141700 -2.63104600

H 2.59534700 -5.75879400 -2.42180300  
H 2.42383500 -4.44916900 -3.61014300  
H 3.92103000 -4.60114800 -2.68455300  
C 2.85695600 -4.18259300 -0.16884900  
H 3.94197600 -4.02789000 -0.16759900  
H 2.41052900 -3.58358500 0.62851200  
H 2.66089500 -5.23775500 0.04862100  
C 0.72190300 -3.96817300 -1.47335400  
H 0.25148300 -3.63773600 -2.40547300  
H 0.46462900 -5.02143500 -1.32070600  
H 0.29618200 -3.39815200 -0.64498100  
C 3.67232200 5.12299000 1.43039400  
H 4.27949000 5.42973500 2.11898700  
H 4.06752200 6.14352900 1.40370300  
H 2.65344400 5.15435800 1.82602600  
C 2.83585000 5.36644800 -0.93139100  
H 2.84172500 4.94189700 -1.93819100  
H 1.79920500 5.42125100 -0.58236900  
H 3.23102100 6.38647400 -0.97870100  
C 5.13780200 4.45499000 -0.50313500  
H 5.58089300 5.45619000 -0.49618900  
H 5.75554600 3.80408700 0.12587800  
H 5.15885500 4.07302800 -1.52746000  
O -3.56720400 0.78480500 -0.15157400  
C -4.45498500 -0.08516400 0.36409600  
H -5.78733000 0.00535100 -0.31501000  
H -6.30322700 -0.94461400 -0.16441200  
H -5.63319500 0.15911200 -1.38490600  
H -6.60487900 1.16643100 0.28586700  
C -6.71027200 1.00797500 1.36486900  
H -6.05400600 2.10271300 0.14338700  
H -7.96476200 1.25954900 -0.36091500  
C -8.14693900 2.00666000 -1.52652300  
H -9.05173500 0.55887000 0.16531200  
C -9.38937200 2.05664600 -2.15190500  
H -7.30630900 2.55605100 -1.94419500  
C -10.29618500 0.60600300 -0.45675300  
H -8.92018800 -0.02542600 1.07305600  
C -10.46792400 1.35582400 -1.61765300  
H -9.51610400 2.64532800 -3.05519000  
H -11.13272500 0.05914200 -0.03294000  
H -11.43807800 1.39551400 -2.10267700  
O -4.22323100 -0.78892900 1.32929100  
F -2.51269800 -3.51758800 -0.19396700  
H -2.40996800 -3.24837200 0.73149600  
F -2.48712500 -0.26397800 3.15514400  
H -3.03745500 -0.58969600 2.43052400  
F -2.08086600 -2.74888800 2.10418300  
H -1.13098100 -2.92041500 2.22983000  
F -0.29907500 -1.44467800 3.47981800  
H -1.13937300 -0.99702900 3.35630900  
F 0.27638900 -3.44115400 1.95341800  
H 0.90444100 -2.79980800 3.23688200  
F 2.08969200 -1.88059900 2.52516000  
H 1.81550600 -0.92742100 2.47393000  
F -3.92877900 -1.82133400 -1.41122200  
H -3.49912100 -2.54660900 -0.96739500

IM1-10

I -2.81751500 0.46211800 0.30969700  
C -2.74870000 1.31423200 -1.61055800  
C -2.56536600 2.44060100 -4.12039600  
C -2.57103900 0.47987400 -2.70763100  
C -2.83630000 2.69651800 -1.73278400  
C -2.74144400 3.25596500 -3.00552300  
C -2.48251300 1.05841000 -3.97127100  
H -2.50749300 -0.59492400 -2.58184000  
H -2.96516700 3.32464500 -0.85798600  
H -2.81038800 4.33279500 -3.12005800  
H -2.33761000 0.42277100 -4.83852900  
H -2.49079600 2.88348300 -5.10805700  
O -2.12119900 -0.88645000 2.95064900  
H -0.79292800 -0.97272300 2.64098400  
C 1.92082800 -0.99369200 2.02282400  
C -0.31097300 -1.83695400 1.65640100  
C 0.08879900 -0.13516200 3.31899200  
C 1.45028200 -0.14841800 3.02676000  
C 1.04284400 -1.83938100 1.34992800  
H -0.99946600 -2.49228500 1.12954000  
H -0.30352600 0.51828500 4.09182800  
H 2.13113800 0.49517000 3.56385300  
H 1.44057500 -2.49321700 0.58113300  
O -4.11055700 -0.93306200 -0.65775900  
C -4.20810700 -2.07172100 -0.01433800  
C -3.65350900 -2.28067800 1.06093300  
H -5.08633300 -3.10727300 -0.71371100  
O -1.64889200 2.10471700 0.89352100  
C -0.37003000 2.05826400 0.57554800  
O 0.13232400 1.05627500 0.07711000  
C 0.41589600 3.34475900 0.81659600  
H -2.61628900 -1.57932700 2.47221200  
C 1.07922200 3.70531100 -0.52387100  
H 1.64080100 4.63776300 -0.40762600  
H 1.77050500 2.91776700 -0.83132700  
C 0.33010700 3.85043800 -1.31104600  
H -0.48838800 4.48202700 1.28955300  
H -1.25670100 4.71785800 0.54621400  
H -0.98950200 4.23008200 2.22772900  
H 0.11830100 5.37898400 1.44993900  
H 1.50352600 3.04852600 1.85869300  
H 2.15130700 2.23218700 1.53261100

H 2.11952800 3.94316800 1.99775700  
H 1.06209300 2.78254200 2.82490500  
C -4.59989600 -3.27573500 -2.15963600  
H -3.56068900 -3.62174600 -2.18920400  
H -5.21768200 -4.02214500 -2.66934600  
H -4.67032300 -2.33238900 -2.70763000  
C -6.52768100 -2.57347100 -0.71142400  
H -6.89173600 -2.43041400 0.31126100  
H -6.59191500 -1.61990200 -1.24209000  
H -7.18463600 -3.29521000 -1.20773700  
C -5.00685500 -4.43313500 0.04061100  
H -5.64596300 -5.17364500 -0.45087900  
H -3.98218700 -4.81502600 0.05858500  
H -5.33756400 -4.31562200 1.07547000  
O 3.24665300 -1.13641200 1.65005900  
C 4.16068100 -0.14161700 1.76489900  
C 5.42326700 -0.52883400 1.03511800  
H 5.75083500 -1.50849600 1.40127000  
H 6.18934500 -0.50855600 1.28468700  
C 5.21827500 -0.60289500 -0.48985800  
H 4.40283800 -1.30088700 -0.70218700  
H 4.89663300 0.37542200 -0.85553300  
C 6.48867300 -1.03946800 -1.17558700  
C 7.41932100 -0.09811600 -1.62104200  
C 6.78345900 -2.39583900 -1.33551200  
H 8.61360500 -0.49938300 -2.21369200  
H 7.19970900 0.96050400 -1.50377900  
C 7.97543800 -2.80299900 -1.92761900  
H 6.06541500 -3.13835000 -0.99432000  
C 8.89511400 -1.85432500 -2.28894300  
H 9.32363500 0.24680400 -2.55732300  
H 8.18543100 -3.86153100 -2.04790600  
H 9.82440500 -2.16939700 -2.83311500  
O 3.99640400 0.87906200 2.38008800  
F 2.64516600 0.81518800 -0.28894300  
H 1.69299400 0.84865200 -0.14309400

IM1-11

I 2.88062300 0.41774500 -0.49162000  
C 2.84774800 1.91895000 0.97561000  
C 2.71322600 3.89074100 2.89674800  
C 2.71861800 1.54691200 2.30845200  
C 2.91143300 3.24927000 0.57570900  
C 2.84505300 4.23860500 1.55430500  
C 2.65541800 2.55069500 3.27171900  
H 2.67200000 0.50101700 2.59019600  
H 3.00538600 3.51082200 -0.47288500  
H 2.89104900 5.28223300 1.26160700  
H 2.54933800 2.27969600 4.31688200  
H 2.65740800 4.66651700 3.65319500  
O 2.12053600 -1.75209100 -2.49040200  
C 0.87676200 -1.87072400 -1.93333800  
H -1.66252400 -1.93786200 -0.82878100  
C 0.67559700 -2.47613100 -0.69350400  
O -0.19860300 -1.31195000 -2.62523400  
C -1.47336400 -1.34324500 -2.07364500  
C -0.60187900 -2.51003700 -0.14325700  
H 1.51877500 -2.91006900 -0.16280800  
H -0.01624100 -0.86100200 -3.59569700  
H -2.32422000 -0.91086100 -2.58863200  
H -0.78431900 -2.96970100 0.82207100  
O 4.28456400 -0.47033500 0.82873600  
C 4.52447900 -1.72359000 0.51644900  
O 4.01366400 -2.26783200 -0.45789700  
C 5.49885700 -2.42597400 1.45750200  
O 1.57914500 1.69568900 -1.56699800  
C 0.33559200 1.76957400 -1.17249100  
O -0.09935100 1.04210500 -0.27521500  
C -0.51298500 2.83456400 -1.86403900  
H 2.76959600 -2.22704000 -1.93857800  
C -1.17744900 3.67285600 -0.75978700  
H -1.78929300 4.45420400 -1.22122400  
H -1.82118000 3.05435900 -0.13158200  
H -0.42501800 4.15566200 -0.12598600  
C 0.34217600 3.72744800 -2.76377100  
H 1.11646700 4.24582300 -2.18964100  
H 0.83225500 3.14980800 -3.55133900  
H -0.29842300 4.48130300 -3.23193300  
C -1.58845000 2.12436200 -2.69979300  
H -2.25352300 1.51787700 -2.08325600  
H -2.19837700 2.87861400 -3.20742000  
H -1.13577300 1.48285400 -3.46302800  
C 5.00161200 -2.25986600 2.90024000  
H 4.00851000 -2.70367100 3.02989200  
H 5.68950100 -2.76733900 3.58407800  
H 4.95134200 -1.20363200 3.17732400  
C 8.68673300 -1.74860700 1.30022800  
H 7.23861500 -1.84149700 0.27353400  
H 6.81354700 -0.68756500 1.55733200  
H 7.59247700 -2.23185100 1.96559700  
C 5.58684800 -3.90444100 1.08349500  
H 6.29486700 -4.40868900 1.74875500  
H 4.61304500 -4.39328900 1.17768800  
H 5.92519800 -4.02880900 0.05190400  
O -2.89788700 -1.91015800 -0.20389700  
C -3.97720600 -2.40896200 -0.87485700  
C -5.27718100 -2.05919700 -0.19013600  
H -5.85416300 -2.98301200 -0.07988600  
H -5.81401400 -1.44448700 -0.91960400  
C -5.16548100 -1.30515000 1.13975000  
H -4.86317000 -1.99264200 1.93683500

|   |             |             |             |
|---|-------------|-------------|-------------|
| H | -4.37689600 | -0.55264000 | 1.06126900  |
| C | -6.46985200 | -0.63103300 | 1.48842100  |
| C | -6.86068600 | 0.50565200  | 0.77196800  |
| C | -7.31250200 | -1.12010700 | 2.48538000  |
| C | -8.06663000 | 1.13847500  | 1.05087500  |
| H | -6.20180900 | 0.88175200  | -0.00864700 |
| C | -8.52252600 | -0.48805200 | 2.76783800  |
| H | -7.01704300 | -2.00251900 | 3.04795100  |
| C | -8.90216900 | 0.64271700  | 2.05165300  |
| H | -8.35603900 | 2.02170300  | 0.48931100  |
| H | -9.16744100 | -0.87987600 | 3.54872700  |
| H | -9.84351300 | 1.13704500  | 2.27094200  |
| O | -3.88770200 | -3.03494300 | -1.89442700 |
| F | -4.09688500 | 0.27806800  | -1.40750000 |
| H | -3.47424800 | 0.44140000  | -0.69721900 |
| F | -2.45625400 | 0.90560700  | 0.37424600  |
| H | -1.49788100 | 0.92911700  | 0.09797800  |

IM1-12

|   |             |             |             |
|---|-------------|-------------|-------------|
| I | -2.81718300 | 0.29296500  | 0.37238300  |
| C | -4.41775100 | 1.60275300  | -0.00137800 |
| C | -6.55983900 | 3.25979100  | -0.51226000 |
| C | -5.32246100 | 1.24310200  | -0.99395400 |
| C | -4.54920000 | 2.77174500  | 0.73781300  |
| C | -5.63516800 | 3.60295300  | 0.47090200  |
| C | -6.40328700 | 2.08486700  | -1.24383600 |
| H | -5.18654700 | 0.33158600  | -1.56898100 |
| H | -3.81897700 | 3.03633300  | 1.49414700  |
| H | -5.75665900 | 4.51892900  | 1.03960100  |
| H | -7.11777400 | 1.82067300  | -2.01656000 |
| H | -7.40371700 | 3.91201000  | -0.71155300 |
| O | -1.74625000 | -2.40913900 | 0.60574200  |
| C | -0.41063800 | -2.22415100 | 0.35573100  |
| C | 2.27855300  | -1.77845200 | -0.06394100 |
| C | 0.09977100  | -2.24060000 | -0.94114300 |
| C | 0.42208400  | -1.98226800 | 1.44509600  |
| C | 1.77642500  | -1.75981200 | 1.23193500  |
| C | 1.45433100  | -2.01453200 | -1.15759900 |
| H | -0.56683000 | -2.42007200 | -1.78123600 |
| H | 0.00042300  | -1.98274700 | 2.44477000  |
| H | 2.46610400  | -1.57792700 | 2.04940900  |
| H | 1.86714300  | -2.01530000 | -2.15801500 |
| O | -4.36577100 | -1.07255900 | 0.66035400  |
| C | -4.57764400 | -2.02051900 | -0.23809400 |
| O | -3.83776900 | -2.22356000 | -1.18908600 |
| C | -5.85083400 | -2.81897200 | 0.03686500  |
| O | -1.76244900 | 2.17107300  | 0.18916600  |
| C | -0.50533300 | 2.12140000  | -0.09808200 |
| O | 0.07382000  | 1.02963700  | -0.24495100 |
| C | 0.20679700  | 3.46503600  | -0.24156000 |
| H | -2.20614200 | -2.64037700 | -0.22329800 |
| C | 0.77976800  | 3.54412400  | -1.66675300 |
| H | 1.29292900  | 4.50301000  | -1.79001900 |
| H | 1.49907800  | 2.74451200  | -1.85063000 |
| H | -0.01764200 | 3.48760200  | -2.41521600 |
| C | -0.76095600 | 4.62480500  | -0.00150300 |
| H | -1.59215200 | 4.60514100  | -0.71183400 |
| H | -1.17750200 | 4.59139000  | 1.00930400  |
| H | -0.22291700 | 5.57038600  | -0.12089400 |
| C | 1.34539500  | 3.50776800  | 0.79043900  |
| H | 2.05781500  | 2.69444300  | 0.64904900  |
| H | 1.88421900  | 4.54498000  | 0.68774500  |
| H | 0.95295200  | 3.45067900  | 1.81111700  |
| C | -7.04653600 | -1.86508700 | -0.11225300 |
| H | -7.11793000 | -1.47878800 | -1.13551300 |
| H | -7.97287700 | -2.40581600 | 0.10733200  |
| H | -6.96378000 | -1.01882900 | 0.57556300  |
| C | -5.79335100 | -3.36319900 | 1.47142900  |
| H | -4.91629200 | -4.00290900 | 1.61435900  |
| H | -5.74784700 | -2.54925500 | 2.19844200  |
| H | -6.68839100 | -3.96214000 | 1.66836100  |
| C | -5.95149500 | -3.96381400 | -0.96967100 |
| H | -6.87111300 | -4.52965700 | -0.78985200 |
| H | -5.96589200 | -3.58627800 | -1.99522100 |
| H | -5.10104700 | -4.64478300 | -0.87611100 |
| O | 3.41968700  | -1.45736000 | -0.18721700 |
| C | 4.46392000  | -2.23391700 | -0.92550400 |
| C | 5.88666000  | -1.80534100 | -0.67540000 |
| H | 6.53305400  | -2.36750800 | -1.35220500 |
| H | 6.11602800  | -2.09204100 | 0.35712800  |
| C | 6.10930900  | -0.29012100 | -0.81465000 |
| H | 5.92905200  | 0.10723300  | -1.85071800 |
| H | 5.38178500  | 0.23447200  | -0.19014400 |
| C | 7.50692900  | 0.09074800  | -0.39097200 |
| C | 7.83345600  | 0.10761800  | 0.96924400  |
| C | 8.49465100  | 0.39634200  | -1.32671900 |
| C | 9.12255800  | 0.42966100  | 1.38000800  |
| H | 7.06339100  | -0.13877200 | 1.69730500  |
| C | 9.78692700  | 0.71937100  | -0.91689900 |
| H | 8.24815700  | 0.38474600  | -2.38581800 |
| C | 10.10349700 | 0.73736200  | 0.43800000  |
| H | 9.36302000  | 0.44303400  | 2.43883700  |
| H | 10.54480400 | 0.95812800  | -1.65702300 |
| H | 11.10903800 | 0.99026700  | 0.75987500  |
| O | 4.09467000  | -3.13295000 | -1.63021800 |
| F | 4.95633800  | -1.05034900 | 2.17161900  |
| H | 4.44511000  | -0.38281700 | 1.73004800  |
| F | 3.58697400  | 0.89851900  | 1.20319700  |
| H | 3.18438000  | 0.78679200  | 0.32601400  |
| F | 2.39432600  | 0.91544300  | -0.93115900 |
| H | 1.41872900  | 0.93502900  | -0.64883300 |

IM1-13

|   |             |             |             |
|---|-------------|-------------|-------------|
| I | -2.69262700 | 0.45348600  | 0.39442100  |
| C | -4.00232900 | 2.06115500  | 0.07348100  |
| C | -5.74477300 | 4.15339400  | -0.33548200 |
| C | -4.96566500 | 1.94105200  | -0.92174200 |
| C | -3.88021000 | 3.19703300  | 0.86582500  |
| C | -4.76428900 | 4.25065600  | 0.64932600  |
| C | -5.84425100 | 3.00516200  | -1.11658100 |
| H | -5.02511400 | 1.04677000  | -1.53386600 |
| H | -3.10907800 | 3.26637800  | 1.62516000  |
| H | -4.68638400 | 5.14564100  | 1.25764100  |
| H | -6.60181900 | 2.93391600  | -1.89004700 |
| H | -6.43174000 | 4.97771400  | -0.49628000 |
| O | -2.16429600 | -2.51967500 | -0.58750500 |
| C | -0.88271400 | -2.15825100 | -0.89903500 |
| C | 1.74127300  | -1.40732600 | -1.37389300 |
| C | -0.58949000 | -1.29573700 | -1.95352700 |
| C | 0.14081700  | -2.64912900 | -0.08713400 |
| C | 1.45399000  | -2.27827300 | -0.32497300 |
| C | 0.73305800  | -0.92296500 | -2.19269000 |
| H | -1.39099900 | -0.92010800 | -2.58561500 |
| H | -0.10818000 | -3.31801000 | 0.72970100  |
| H | 2.25574500  | -2.65664900 | 0.29224800  |
| O | 0.98737100  | -0.25558100 | -3.00950000 |
| O | -4.39047200 | -0.69698900 | 0.75006400  |
| C | -4.89534400 | -1.38718600 | -0.26157100 |
| O | -4.50415700 | -1.26618700 | -1.41440900 |
| C | -5.98762000 | -2.36126700 | 0.16670100  |
| O | -1.25049700 | 2.03271400  | 0.07736800  |
| C | -0.03541700 | 1.70178500  | 0.35531200  |
| O | 0.22443800  | 0.55802900  | 0.77931600  |
| C | 1.03788300  | 2.76493100  | 0.15423500  |
| H | -2.77640000 | -2.21828900 | -1.28268700 |
| C | 2.05227100  | 2.21438900  | -0.86126400 |
| H | 2.85281900  | 2.94920200  | -0.99762400 |
| C | 2.50065100  | 1.27901300  | -0.51904400 |
| H | 1.58019100  | 2.03817000  | -1.83361500 |
| C | 0.42723500  | 4.07054300  | -0.35470500 |
| H | -0.07708100 | 3.92669700  | -1.31388800 |
| H | -0.30295000 | 4.47232300  | 0.35376500  |
| H | 1.22313400  | 4.80980300  | -0.48786600 |
| H | 1.72781000  | 2.99177000  | 1.51050200  |
| H | 2.19385500  | 2.07486400  | 1.87624800  |
| H | 2.50886900  | 3.74870400  | 1.38972000  |
| H | 1.01621800  | 3.35471200  | 2.25998800  |
| C | -7.06317600 | -1.60242100 | 0.95541200  |
| H | -7.52394200 | -0.81978700 | 0.34274900  |
| H | -7.84925900 | -2.30033300 | 1.26108300  |
| H | -6.64043300 | -1.13829800 | 1.84940700  |
| C | -5.32362800 | -3.42028200 | 1.06327300  |
| H | -4.50947000 | -3.92797300 | 0.53593300  |
| H | -4.91526600 | -2.96412600 | 1.96854800  |
| H | -6.06864500 | -4.16869100 | 1.35234000  |
| C | -6.59036700 | -3.01601500 | -1.07519700 |
| H | -7.37025800 | -3.72256000 | -0.77354500 |
| H | -7.03476200 | -2.26896100 | -1.73894400 |
| H | -5.82923500 | -3.55775400 | -1.64240800 |
| O | 3.02022100  | -0.91375100 | -1.56852000 |
| C | 4.07540100  | -1.78272500 | -1.55177300 |
| C | 5.38780900  | -1.04248000 | -1.48959100 |
| H | 5.76461800  | -0.92005500 | -2.51257700 |
| H | 6.07824500  | -1.71288700 | -0.97340700 |
| C | 5.31137800  | 0.31460000  | -0.77443100 |
| H | 4.85678200  | 1.05632200  | -1.43945800 |
| H | 4.65480600  | 0.10746000  | 0.09458600  |
| C | 6.67856600  | 0.77057300  | -0.32946200 |
| C | 7.25878600  | 0.18845500  | 0.80281800  |
| C | 7.39913300  | 1.73530700  | -1.03315500 |
| C | 8.52962000  | 0.56704400  | 1.22136300  |
| H | 6.69393000  | -0.56481200 | 1.34804000  |
| C | 8.67325000  | 2.11725900  | -0.61652800 |
| H | 6.95635400  | 2.19375400  | -1.91447800 |
| C | 9.24128600  | 1.53424000  | 0.51213600  |
| H | 8.96621000  | 0.11005400  | 2.10440400  |
| H | 9.22087600  | 2.87152700  | -1.17377100 |
| H | 10.23276300 | 1.83156900  | 0.83946400  |
| O | 3.94734200  | -2.97464700 | -1.60089300 |
| F | 4.51337700  | -1.88929800 | 1.10246800  |
| H | 4.32061400  | -2.81627700 | 1.21841100  |
| F | 3.41157400  | -3.98166200 | 1.83483200  |
| H | 2.85624400  | -3.31934700 | 2.27641300  |
| F | 2.11578700  | -2.10148700 | 2.69657000  |
| H | 2.36663900  | -1.32142100 | 2.15086900  |
| F | 2.45926600  | -0.12563500 | 1.35023500  |
| H | 1.51090100  | 0.15402200  | 1.08138600  |

IM1-14

|   |             |             |             |
|---|-------------|-------------|-------------|
| I | -2.68615200 | 0.44630400  | 0.45973500  |
| C | -4.13876300 | 1.94864100  | 0.19900900  |
| C | -6.09254700 | 3.85762500  | -0.16366400 |
| C | -3.96411800 | 2.90155000  | -0.79725900 |
| C | -5.26170700 | 1.92087900  | 1.01828900  |
| C | -6.24401400 | 2.88980100  | 0.82582100  |
| C | -4.95709500 | 3.86316700  | -0.96979700 |
| H | -3.07609600 | 2.90157400  | -1.41801600 |
| H | -5.37676700 | 1.15799000  | 1.78033400  |
| H | -7.12567900 | 2.88587900  | 1.45831500  |
| H | -4.84056800 | 4.61325200  | -1.74499700 |
| H | -6.86157400 | 4.60933100  | -0.30756800 |
| O | -2.15726000 | -2.39435700 | -0.89445400 |

|   |             |             |             |
|---|-------------|-------------|-------------|
| C | -0.88757800 | -1.96974700 | -1.16482200 |
| C | 1.71809400  | -1.11172300 | -1.56351600 |
| C | -0.61059700 | -1.02863100 | -2.15454600 |
| C | 0.14379100  | -2.48533100 | -0.37706800 |
| C | 1.44499700  | -2.05485900 | -0.57493400 |
| C | 0.70277000  | -0.60400700 | -2.35827000 |
| H | -1.41768200 | -0.63545000 | -2.76871600 |
| H | -0.08049900 | -3.22385100 | 0.38457300  |
| H | 2.25563300  | -2.44442500 | 0.02250300  |
| H | 0.94393700  | 0.11880800  | -3.13069000 |
| O | -4.27954700 | -0.83211100 | 0.78661300  |
| C | -4.88726500 | -1.32079800 | -0.29467100 |
| O | -4.54459200 | -1.04119400 | -1.42950600 |
| C | -6.02431500 | -2.27594300 | 0.04966500  |
| O | -1.35761900 | 2.13814400  | 0.16964500  |
| C | -0.11549900 | 1.85189000  | 0.35632500  |
| O | 0.21648300  | 0.70047000  | 0.70663200  |
| C | 0.90102000  | 2.96740400  | 0.14691100  |
| H | -2.78633000 | -1.99977800 | -1.52430300 |
| C | 1.88650200  | 2.50674000  | -0.93963400 |
| H | 2.64600100  | 3.28298500  | -1.08083100 |
| H | 2.39261000  | 1.57856500  | -0.66375800 |
| H | 1.37441000  | 2.35273500  | -1.89536300 |
| C | 0.21022500  | 4.26400700  | -0.27520400 |
| H | -0.32598400 | 4.13842700  | -1.22039100 |
| H | -0.50610700 | 4.59934700  | 0.47979900  |
| H | 0.96521000  | 5.04474700  | -0.40953700 |
| C | 1.64715900  | 3.16843400  | 1.47744700  |
| H | 2.          |             |             |

|        |              |              |             |       |             |             |             |       |             |             |             |
|--------|--------------|--------------|-------------|-------|-------------|-------------|-------------|-------|-------------|-------------|-------------|
|        | -0.64875900  | -2.26301400  | -0.76137500 | H     | -0.98622000 | 4.44889700  | -2.14261600 | H     | -1.57602300 | 5.38544800  | 2.93890500  |
| O      | -1.57876600  | 2.04935500   | 0.86404900  | H     | -1.10444400 | 4.62379000  | -0.38522500 | H     | -0.63606600 | 3.87862700  | 2.91154500  |
| C      | -0.32744500  | 2.01329600   | 0.58009000  | H     | 0.19312700  | 5.45262000  | -1.27252700 | C     | -3.30307600 | 3.22730900  | 2.99350900  |
| O      | 0.27479200   | 0.93917300   | 0.34268400  | C     | 1.34463400  | 3.51296200  | 0.26345600  | H     | -4.19463100 | 2.69308800  | 2.64730000  |
| C      | 0.40667300   | 3.34940200   | 0.55882500  | C     | 2.03539200  | 2.68434500  | 0.42167000  | H     | -2.69367200 | 2.52511400  | 3.56622200  |
| H      | -2.53161100  | -2.19801800  | -1.20083100 | H     | 1.92746700  | 4.43523600  | 0.17964000  | H     | -3.62407400 | 4.04251000  | 3.65206200  |
| C      | 1.11380300   | 3.48864700   | -0.79969900 | H     | 0.68315200  | 3.59091700  | 1.12966800  | C     | -3.39059100 | 4.73692500  | 0.98044800  |
| H      | 1.62810700   | 4.45407500   | -0.83208700 | C     | -6.33051200 | -3.68364800 | -0.98484100 | H     | -3.75499400 | 5.55034700  | 1.61720800  |
| H      | 1.85689500   | 2.70361600   | -0.94789900 | H     | -5.58707300 | -4.23653100 | -1.56487100 | H     | -2.82792400 | 5.16751200  | 0.14922200  |
| H      | 0.39468400   | 3.46165300   | -1.62592500 | H     | -6.99616000 | -4.40149900 | -0.49547100 | H     | -4.25558300 | 4.20871100  | 0.56640100  |
| C      | -0.56215700  | 4.51241000   | 0.77118100  | H     | -6.91901500 | -3.08059400 | -1.68193500 | O     | 4.46693900  | 0.35172300  | -0.80361200 |
| H      | -1.32575700  | 4.54537300   | -0.10233000 | C     | -6.71093100 | -0.03507000 | 0.87806600  | C     | 5.43030200  | 0.22516300  | -1.57446400 |
| H      | -1.07292100  | 4.43468000   | 1.73417100  | H     | -6.23892900 | -1.40014600 | 1.63538700  | C     | 6.79483300  | -0.20168600 | -1.10541700 |
| H      | -0.00316400  | 5.45297100   | 0.74849100  | H     | -7.31831200 | -1.39462700 | 0.22431800  | H     | 7.53363600  | 0.23363000  | -1.77180600 |
| C      | 1.44712400   | 3.30217700   | 1.69263400  | H     | -7.38047400 | -2.73739400 | 1.37843600  | H     | 6.86185300  | -1.30659800 | -1.19982700 |
| C      | 2.12941500   | 2.46073500   | 1.56243300  | C     | -4.79816400 | -3.66340700 | 1.01628900  | C     | 7.06595200  | 0.17883300  | 0.35764800  |
| H      | 2.02876100   | 4.22920200   | 1.68277200  | H     | -5.42933600 | -4.41612100 | 1.49966700  | H     | 6.96396400  | 1.26507100  | 0.46047500  |
| C      | 0.95811500   | 3.21528100   | 2.66841100  | H     | -4.00528900 | -4.17834400 | 0.46464200  | H     | 6.30649200  | -0.28230500 | 0.95999200  |
| C      | -6.37236600  | -2.64297700  | -2.20536300 | H     | -4.33190400 | -3.04588100 | 1.78775100  | C     | 8.44636100  | -0.25395000 | 0.78638700  |
| H      | -5.54754800  | -3.19839600  | -2.65882000 | O     | 3.50522500  | -1.88399600 | -0.88021000 | C     | 8.64975000  | -1.50730200 | 1.36768500  |
| H      | -7.26915200  | -3.77008200  | -2.22596800 | C     | 4.29531400  | -2.49104000 | -0.05213900 | C     | 9.55248200  | 0.56872500  | 0.56180700  |
| H      | -6.55289000  | -1.75380600  | -2.81570200 | C     | 5.70425300  | -1.94556400 | 0.03086300  | C     | 9.92857500  | -1.92944600 | 1.72044700  |
| C      | -7.20380700  | -1.46533500  | -0.14002800 | H     | 6.38094800  | -2.77853700 | -0.18975400 | H     | 7.79501000  | -2.15492700 | 1.54917000  |
| H      | -6.99590400  | -1.22575900  | 0.90618200  | H     | 5.90967700  | -1.65232800 | 1.06515800  | C     | 10.83303600 | 0.15122900  | 0.91287300  |
| H      | -7.37719200  | -0.53104500  | -0.68609800 | C     | 5.95462400  | -0.76323300 | -0.91183200 | H     | 9.40506900  | 1.54760400  | 0.11166600  |
| H      | -8.12188700  | -2.05991200  | -0.18378700 | C     | 5.96530400  | -1.10996900 | -1.95030600 | C     | 11.02422900 | -1.10024500 | 1.49366300  |
| C      | -5.76462100  | -3.52025400  | 0.07694300  | H     | 5.12455900  | -0.05747500 | -0.82621600 | H     | 10.06900200 | -2.90466100 | 2.17637200  |
| H      | -6.64199700  | -1.47478300  | 0.05837500  | C     | 7.25068100  | -0.06974100 | -0.57092900 | H     | 11.68171800 | 0.80473600  | 0.73595000  |
| H      | -4.91256000  | -4.07741400  | -0.32624200 | C     | 7.30508000  | 0.76954500  | 0.54683000  | H     | 12.02168900 | -1.42624700 | 1.77089200  |
| H      | -5.54396400  | -3.25822600  | 1.11466300  | C     | 8.41116000  | -0.26730900 | -1.31850300 | O     | 5.20676300  | 0.97900700  | -2.48167500 |
| O      | 3.32865100   | -1.37358500  | -1.42494100 | C     | 8.92204000  | 1.39804100  | 0.90616600  |       |             |             |             |
| C      | 4.32474900   | -2.23145400  | -1.07262800 | H     | 6.40016500  | 0.92166300  | 1.13202100  | IM2-2 |             |             |             |
| C      | 5.68467300   | -1.58932400  | -1.21105400 | C     | 9.60320400  | 0.36114700  | -0.96227100 | I     | 0.39401600  | 0.32023300  | -0.09228900 |
| C      | 6.20646400   | -2.07839500  | -2.04214400 | H     | 8.37973600  | -0.91702500 | -2.18992400 | C     | 2.24759300  | 1.21978400  | -0.47347500 |
| H      | 6.22476400   | -1.827042800 | -0.30236300 | C     | 9.64646400  | 1.19536900  | 0.15069000  | C     | 4.71782100  | 2.36644200  | -0.87174000 |
| C      | 5.68053300   | -0.06529300  | -1.37841500 | H     | 8.51803300  | 2.04902600  | 1.77484100  | C     | 2.70105200  | 2.16951300  | 0.43816100  |
| H      | 5.37110300   | 0.19608100   | -2.39562300 | H     | 10.49767000 | 0.19906900  | -1.55619500 | C     | 2.98973900  | 0.83377200  | -1.58349300 |
| H      | 4.93485100   | 0.35871900   | -0.70154800 | H     | 10.57375700 | 1.68654400  | 0.42884700  | C     | 4.24697900  | 1.41037100  | -1.76638700 |
| C      | 7.04099700   | 0.51106800   | -1.07403600 | C     | 3.90443100  | -3.34767000 | 0.79531400  | C     | 3.94274800  | 2.75347900  | 0.21266290  |
| C      | 7.44609700   | 0.64192900   | 0.25866500  | F     | 3.86744700  | -0.11654600 | 1.33485900  | H     | 2.09584600  | 2.45042900  | 1.29298200  |
| C      | 7.92700400   | 0.88734900   | -2.08328700 | C     | 3.33262600  | -0.28305900 | 2.16944900  | H     | 2.62166400  | 0.90122300  | -2.28107000 |
| C      | 8.70585300   | 1.13954500   | 0.57308100  | F     | 2.71414700  | -0.68513400 | 3.33468500  | H     | 4.85396500  | 1.10425300  | -2.61201100 |
| H      | 6.75406400   | 0.34661900   | 1.04484800  | H     | 1.75595900  | -0.83728200 | 2.35242600  | H     | 4.31086600  | 3.50265500  | 0.91525700  |
| C      | 9.19063600   | 1.38701200   | -1.77285600 | F     | 1.41711700  | 0.72666100  | 1.61979500  | H     | 5.69175100  | 2.82002900  | -1.02869800 |
| H      | 7.62211300   | 0.79080700   | -3.12276600 | C     | 3.12894700  | 0.43936000  | 0.21222100  | O     | 2.71560600  | -2.19757900 | -1.06488300 |
| C      | 9.58315400   | 1.51456200   | -0.44386100 | F     | 2.81529200  | 0.82358200  | -0.66326300 | C     | 1.58919800  | -2.30309700 | -1.09580900 |
| H      | 9.00437300   | 1.23864100   | 1.61248000  | H     | 1.24710100  | 0.89147600  | -0.60682700 | C     | -0.96643700 | -2.78214400 | 0.10221600  |
| H      | 9.86778500   | 1.67771000   | -2.57052700 | F     | -1.42653500 | -0.19404500 | 2.59369700  | C     | 1.28643700  | -1.88091000 | 0.28063500  |
| H      | 10.56643000  | 1.90490700   | -0.20017300 | H     | -1.15654500 | 0.80752100  | 2.16466300  | C     | 0.45130200  | -2.78546500 | -1.87679100 |
| O      | 4.13624200   | -3.36004500  | -0.70715800 | F     | -0.75332000 | 1.77375400  | 1.64822500  | C     | -0.76066300 | -3.00521600 | -1.31141700 |
| F      | 4.35015300   | -0.96095700  | 1.27738300  | H     | 0.57570300  | 1.22394400  | 1.64925800  | C     | 0.05003600  | -2.34385500 | 0.88533100  |
| H      | 4.11371500   | -1.62446600  | 1.93393000  | F     | 0.47475700  | -1.34843000 | 3.24607500  | C     | 2.15450800  | -1.69451200 | 0.91106700  |
| F      | 3.43554900   | -2.57348100  | 2.92042200  | H     | -0.35070900 | -0.78949400 | 2.98330400  | H     | 0.62935300  | -2.99202000 | -2.92665200 |
| F      | 2.50361700   | -2.35006400  | 3.04128600  |       |             |             |             | H     | -1.58444300 | -3.37119800 | -1.91351500 |
| F      | 2.08691500   | -0.26027800  | 2.19900100  | IM2-1 |             |             |             | H     | -0.13242800 | -2.16276400 | 1.94025200  |
| F      | 2.76209200   | -0.11793900  | 1.53852400  | I     | -2.10572400 | -0.96663900 | -0.74925300 | O     | 4.04965000  | -0.62654700 | 1.19206700  |
| F      | 2.78054200   | 0.89340600   | 0.06473600  | C     | -3.66872200 | 0.41207000  | -0.93728800 | C     | 5.07616400  | -0.88266100 | 0.58984500  |
| F      | 1.80985800   | 0.88191500   | 0.06286700  | C     | -5.66572000 | 2.28521000  | -1.19422200 | C     | 5.10300400  | -1.53075100 | -0.56695100 |
| F      | 0.97697300   | -2.38193300  | 3.22679200  | C     | -4.46417900 | 0.68663900  | 1.07032600  | C     | 6.46897100  | -0.56697500 | 1.12544400  |
| O      | 0.55761000   | -1.60551000  | 2.85015200  | C     | -3.82811100 | 1.05347900  | -2.16008400 | O     | -0.32798300 | 2.37352200  | -0.36060800 |
| F      | -0.47955200  | -0.56136500  | 2.22212700  | C     | -4.83954700 | 2.00399500  | -2.27885300 | C     | -1.61960700 | 2.39644800  | -0.14312700 |
| H      | 0.03231400   | -0.14290000  | 1.50713600  | C     | -5.47877200 | 1.63044800  | 0.02255800  | O     | -2.26542800 | 1.38818700  | 0.12919500  |
|        |              |              |             | H     | -4.27796700 | 0.19535100  | 1.11951900  | C     | -2.25403800 | 3.78585900  | -0.26281700 |
| IM1-16 |              |              |             | H     | -3.16780800 | 0.83493900  | -2.99218600 | H     | 4.17402300  | -1.75430200 | -0.85113100 |
| I      | -2.74696900  | 0.28614900   | -0.45011800 | H     | -4.97871900 | 2.52054200  | -3.22263700 | O     | -2.21428400 | -2.84204000 | 0.68473100  |
| C      | -4.081176100 | 1.82170600   | 0.04201700  | H     | -6.11577700 | 1.86266000  | 0.80251000  | C     | -3.24709500 | -3.56598200 | 1.58997700  |
| C      | -5.86643600  | 3.79298600   | 0.73079300  | H     | -6.45375800 | 3.02497700  | -1.29349700 | C     | -3.10016600 | -4.50415800 | -0.57508400 |
| C      | -5.35316900  | 1.79196100   | -0.51932200 | O     | -0.93195000 | 0.65762000  | -1.42927300 | C     | -4.54303300 | -2.91948900 | 0.56719600  |
| C      | -3.67116900  | 2.79932300   | 0.94032700  | C     | 0.40659800  | 0.41401700  | -1.28221100 | H     | -5.35516700 | -3.63889900 | 0.44770600  |
| C      | -4.58499300  | 3.79606600   | 1.27683200  | C     | 3.12590200  | -0.05717400 | -1.02141200 | H     | -4.48389400 | -2.60127100 | 1.61119500  |
| C      | -6.25084600  | 2.79477200   | -0.16204400 | C     | 0.998610700 | 0.43157400  | -0.10389400 | C     | -4.75144500 | -1.68127700 | 0.33719800  |
| H      | -5.63813900  | 1.01169300   | -1.21903600 | C     | 1.18303600  | 0.14025800  | -2.41084000 | H     | -3.82875100 | -1.09046300 | -0.34896200 |
| C      | -2.67030800  | 2.77716000   | 1.36153300  | C     | 2.54811500  | -0.09242600 | -2.28720400 | H     | -4.93418300 | -2.02766200 | -1.36165200 |
| H      | -4.29233700  | 4.57050400   | 1.97818600  | C     | 2.36100800  | 0.19921400  | 0.11061100  | C     | -5.88356300 | -0.80106600 | 0.13276200  |
| H      | -7.24862700  | 2.79577400   | -0.58822000 | O     | 0.37261000  | 0.64016900  | 0.85144300  | C     | -7.20489200 | -1.25480600 | 0.10603600  |
| H      | -6.57104800  | 4.57186200   | 1.00346700  | H     | 0.70318000  | 0.12804900  | -3.38405300 | C     | -5.61642000 | 0.48358600  | 0.61161800  |
| O      | -1.98106500  | -2.44907400  | -0.90737400 | C     | 3.15725300  | -0.29005100 | -3.15994500 | C     | -8.24230500 | -0.44189600 | 0.55203500  |
| C      | -0.60772200  | -2.36931700  | -0.93343700 | H     | 2.84600400  | 0.21085500  | 1.08101900  | H     | -7.42363900 | -2.25016500 | -0.27499100 |
| C      | 2.13902600   | -2.10460000  | -0.85168300 | C     | -1.78665100 | 1.51966000  | 1.49418600  | C     | -6.65584700 | 1.29979000  | 1.05374900  |
| C      | 0.12708500   | -2.50522400  | -2.10600800 | C     | -2.00454700 | 2.63157700  | 0.96489300  | H     | -4.58994100 | 0.84596200  | 0.62398600  |
| C      | 0.03262900   | -2.09758500  | 0.27841200  | O     | -1.76604600 | 2.96146600  | -0.30022700 | H     | -7.96941700 | 0.83941000  | 1.02788300  |
| C      | 1.40269800   | -1.96570700  | 0.32276400  | C     | -2.51713300 | 3.79154900  |             |       |             |             |             |

|       |              |             |             |       |              |             |             |       |             |             |             |
|-------|--------------|-------------|-------------|-------|--------------|-------------|-------------|-------|-------------|-------------|-------------|
| H     | 7.03262500   | 0.77880700  | -0.49195000 | O     | 1.11327900   | 0.66201000  | 1.22553500  | H     | -1.64583700 | -1.99453500 | 0.55700000  |
| H     | 8.39816500   | 0.08418100  | 0.40153000  | C     | -0.21163100  | 0.46528600  | 0.95738500  | C     | -6.22281000 | 3.92193300  | -2.02544700 |
| H     | 7.49599700   | -0.90893200 | -0.76526700 | C     | -2.89768000  | 0.09647100  | 0.44815200  | H     | -6.95436700 | 4.73658800  | -2.01662300 |
| C     | 6.36420000   | 0.52041600  | 2.19317200  | C     | -0.66663800  | 0.40907800  | -0.36614900 | H     | -5.49035400 | 4.11723300  | -2.81337100 |
| H     | 7.35138700   | 0.71284000  | 2.62623300  | C     | -1.11043300  | 0.32260200  | 2.01797100  | H     | -6.73701100 | 2.99007400  | -2.27419500 |
| H     | 5.98584800   | 1.45238600  | 1.76115800  | C     | -2.46628900  | 0.14544200  | 1.76622200  | C     | -6.58054900 | 3.51478200  | 0.43218200  |
| H     | 5.67967100   | 0.21875500  | 2.98922000  | C     | -2.02120900  | 0.022596200 | -0.61988800 | H     | -7.09191200 | 2.56725500  | 0.23007100  |
| IM2-3 |              |             |             | H     | 0.05241900   | 0.52670400  | -1.17238300 | H     | -6.10514600 | 3.44918100  | 1.41410700  |
| I     | 2.21957000   | -0.95481400 | 0.70032200  | H     | -0.73235000  | 0.37167500  | 3.03360100  | H     | -7.33428500 | 4.30878800  | 0.45889200  |
| C     | 3.76532800   | 0.44549300  | 0.86973100  | H     | -3.19279900  | 0.04919200  | 2.56450000  | C     | -4.81367700 | 5.13197600  | -0.32700100 |
| C     | 5.73778900   | 2.34750100  | 1.09982000  | H     | -2.40185200  | 0.18103800  | -1.63488100 | H     | -4.05304800 | 5.36035600  | -1.08119600 |
| C     | 4.57623100   | 0.69340400  | -0.23294700 | O     | 2.22821700   | 1.36566900  | -1.57039800 | H     | -5.53125300 | 5.95908600  | -0.31002300 |
| C     | 3.89756500   | 1.12646400  | 2.07436500  | C     | 2.44096000   | 2.49266400  | -1.16291400 | H     | -4.32775900 | 5.07115400  | 0.64973000  |
| C     | 4.89685300   | 2.09128500  | 2.17935700  | O     | 2.11242200   | 2.88954200  | 0.06241900  | C     | -2.07981800 | -4.43667400 | -2.45150900 |
| C     | 5.57816700   | 1.65270500  | -0.09820600 | C     | 3.05095000   | 3.59723600  | -2.01690000 | H     | -1.32113600 | -4.79554700 | -1.74931200 |
| H     | 4.41194700   | 0.16955200  | -1.16864600 | C     | 3.71073900   | -2.53802500 | 0.50953800  | H     | -2.49091500 | -5.29834100 | -2.98805900 |
| H     | 3.22624300   | 0.92685400  | 2.90240400  | C     | 4.22210800   | -2.76950200 | -0.70104900 | H     | -1.59905200 | -3.77389500 | -3.17773100 |
| H     | 5.01498900   | 2.63856200  | 3.10856900  | O     | 3.96665400   | -2.09650100 | -1.67718000 | C     | -4.23648300 | -3.17210700 | -2.71188000 |
| H     | 6.22705900   | 1.86488500  | -0.94243600 | C     | 5.19060800   | -3.95356600 | -0.70513700 | H     | -5.04962600 | -2.65014900 | -2.19558800 |
| H     | 6.51628100   | 3.09862200  | 1.18851800  | H     | 1.70663100   | 2.11262100  | 0.53155100  | H     | -3.77377500 | -2.46777400 | -3.40635200 |
| O     | 1.01974300   | 0.68546600  | 1.29763200  | C     | 5.66761800   | -4.19968200 | -2.13529100 | H     | -4.66769100 | -4.00381600 | -3.27857600 |
| C     | -0.31357200  | 0.42919100  | 1.13977700  | H     | 6.37138300   | -5.03840000 | -2.14990500 | C     | -3.87329700 | -4.64843400 | -0.70467500 |
| C     | -3.01970700  | -0.06355700 | 0.85718300  | H     | 4.82694300   | -4.43624900 | -2.79320100 | H     | -4.34596500 | -5.47782500 | -1.24175800 |
| C     | -0.88492200  | 0.40892800  | -0.13765400 | H     | 6.16605800   | -3.31486300 | -2.53928400 | H     | -3.14156200 | -5.05641400 | -0.00394200 |
| C     | -1.10416400  | 1.016495700 | 2.26450400  | C     | 6.37683700   | -3.58698400 | 0.20037900  | H     | -4.64345700 | -4.12846600 | -0.12562700 |
| C     | -2.46486000  | -0.06616600 | 2.13221700  | H     | 6.87896300   | -2.68178100 | -0.15834500 | O     | 4.12939500  | 0.44814600  | -0.64024300 |
| C     | -2.24621100  | 0.16495700  | -0.27417500 | H     | 6.04551500   | -3.41520700 | 1.22762400  | C     | 4.91392700  | -0.62165300 | -0.76607700 |
| H     | -0.25047600  | 0.59752000  | -0.99951800 | H     | 7.10620600   | -4.40388000 | 0.19821300  | C     | 6.35805400  | -0.28777100 | -0.99926300 |
| H     | -0.64182900  | 0.20193000  | 3.24584000  | C     | 4.47919300   | -5.19561400 | -0.15283300 | H     | 6.57179300  | -0.42741000 | -2.06612900 |
| H     | -3.07545800  | -0.23527600 | 3.01117000  | C     | 3.61449900   | -5.46081700 | -0.77047200 | H     | 6.92085600  | -1.05571000 | -0.46249400 |
| H     | -2.71879800  | 0.14695500  | -1.25062000 | H     | 5.17004100   | -6.04536800 | -0.15637900 | C     | 6.77009000  | 1.11330500  | -0.53131000 |
| O     | 1.90886500   | 1.45773900  | -1.55125000 | C     | 4.13675900   | -5.02815200 | 0.87110200  | H     | 6.37351800  | 1.86865300  | -1.21640400 |
| C     | 2.11858700   | 2.58429300  | -1.14084100 | C     | 1.86909200   | 4.35636800  | -2.64620400 | H     | 6.32067300  | 1.29265600  | 0.44892400  |
| O     | 1.86349600   | 2.95478700  | 0.10961900  | H     | 1.23246100   | 4.79707200  | -1.87298200 | C     | 8.27185000  | 1.21708000  | -0.42942600 |
| C     | 2.63792700   | 3.71697700  | -2.01803600 | H     | 2.24731200   | 5.16208000  | -3.28431000 | C     | 8.92294100  | 0.64474800  | 0.66793500  |
| O     | 3.65660900   | -2.43058700 | 0.38349800  | H     | 1.26039700   | 3.68572700  | -3.26076300 | C     | 9.03540000  | 1.83515200  | -1.41902100 |
| C     | 4.11090200   | -2.62313700 | -0.85567600 | C     | 3.90509300   | 2.95691900  | -3.11127500 | C     | 10.30862200 | 0.69238600  | 0.77369300  |
| O     | 3.79702300   | -1.93098200 | -1.80115700 | H     | 4.75024600   | 2.41337300  | -2.67497800 | H     | 8.32498600  | 0.16444400  | 1.44024200  |
| C     | 5.09325700   | -3.79296600 | -0.93957400 | H     | 3.31829200   | 2.24739300  | -3.69838400 | C     | 10.42437700 | 1.88534700  | -1.31621800 |
| H     | 1.51155000   | 2.15919300  | 0.59227900  | H     | 4.30076400   | 3.73177500  | -3.77600100 | H     | 8.53785300  | 2.28576200  | -2.27455000 |
| C     | 5.51454500   | -3.98405900 | -2.39542800 | C     | 3.88916600   | 4.55563900  | -1.16627200 | C     | 11.06368500 | 1.31395700  | -0.22004500 |
| H     | 6.22576300   | -4.81349100 | -2.46759300 | H     | 4.32296700   | 5.32935500  | -1.80809500 | H     | 10.80097800 | 0.24852600  | 1.63353700  |
| H     | 4.65044000   | -4.20718100 | -3.02708900 | C     | 3.28030500   | 5.03836400  | -0.39868500 | H     | 11.00607900 | 2.37347500  | -0.09221100 |
| H     | 5.98743200   | -3.08012500 | -2.78781700 | H     | 4.70576500   | 4.02429300  | -0.66676600 | H     | 12.14526600 | 1.35440900  | -0.13762600 |
| C     | 6.31128500   | -3.44524800 | -0.06994700 | O     | -4.25208900  | -0.14561800 | 0.18831200  | O     | 4.50039700  | -1.77015800 | -0.72455100 |
| H     | 6.78983200   | -2.52263700 | -0.41625300 | C     | -5.07144100  | 0.90736900  | 0.11496400  | F     | 5.49550500  | -0.51587200 | 1.73318100  |
| H     | 6.02010500   | -3.31310700 | 0.97512900  | C     | -6.50911900  | 0.52171900  | -0.08658900 | H     | 4.87282700  | -1.17611500 | 2.04405100  |
| H     | 7.04786400   | -4.25344700 | -0.13016900 | H     | -6.97966200  | 1.31443500  | -0.67490500 | F     | 2.52510100  | -2.69238300 | -0.14273900 |
| C     | 4.41695400   | -5.06166800 | -0.40358600 | H     | -6.95023300  | 0.56703300  | 0.91745500  | H     | 3.20403200  | -2.29694100 | -0.16553000 |
| H     | 3.53092600   | -5.31496100 | -0.99548900 | C     | -6.74486700  | -0.85869100 | -0.70882500 | F     | 3.68700500  | -2.08306500 | 2.48460800  |
| H     | 5.11551300   | -5.90293000 | -0.46433600 | C     | -6.24447900  | -0.91367200 | -1.68174900 | H     | 3.15167700  | -2.36291000 | 1.71866200  |
| H     | 4.11416800   | -4.93364000 | 0.63842200  | H     | -6.28852800  | -1.62172000 | -0.07182200 | IM2-6 |             |             |             |
| C     | 1.39433600   | 4.43142900  | -2.57645900 | C     | -8.22242700  | -1.12286400 | -0.87060700 | I     | -2.43154600 | 1.13195000  | 0.57691500  |
| H     | 0.78405200   | 4.84203200  | -1.76616100 | C     | -8.97150000  | -1.62837400 | 0.19473700  | C     | -3.89181900 | -0.28278700 | 1.07079600  |
| H     | 1.70458900   | 5.25524700  | -3.22796500 | C     | -8.87683700  | -0.81960000 | -2.06588700 | C     | -5.74886300 | -2.20556300 | 1.71198600  |
| H     | 0.78034100   | 3.73985000  | -3.16178700 | C     | -10.34265400 | -1.82988400 | 0.06793000  | C     | -4.90967800 | -0.54721200 | 0.16050500  |
| C     | 3.45470300   | 3.11642300  | -3.16254400 | H     | -8.47145400  | -1.86922400 | 1.13016400  | C     | -3.76381700 | -0.95528400 | 2.28046800  |
| H     | 4.34476900   | 2.60686600  | -2.77750400 | C     | -10.24845700 | -1.02002300 | -2.19791700 | C     | -4.70711700 | -1.93119800 | 2.59371900  |
| H     | 2.86511700   | 2.38530600  | -3.71960400 | H     | -8.30338000  | -0.42707100 | -2.90251200 | C     | -5.84944000 | -1.51737700 | 0.50373300  |
| H     | 3.78037700   | 3.90914800  | -3.84401700 | C     | -10.98508800 | -1.52597700 | -1.13023700 | H     | -4.94796600 | -0.02963900 | -0.79234800 |
| C     | 3.48337500   | 4.70349000  | -1.20798900 | H     | -10.90966300 | -2.22763600 | 0.90392000  | H     | -2.93832400 | -0.74223300 | 2.95072500  |
| H     | 3.85297800   | 5.49554900  | -1.86821200 | H     | -10.74105000 | -0.78352000 | -3.13602700 | H     | -4.62362200 | -2.47325400 | 3.52969100  |
| H     | 2.89854400   | 5.15981200  | -0.40631000 | H     | -12.05392700 | -1.68523400 | -1.23168300 | H     | -6.65566400 | -1.74361500 | -0.18731600 |
| H     | 4.34456500   | 4.20160200  | -0.75515100 | O     | -4.69441600  | 2.06052200  | 0.21027300  | H     | -6.48188400 | -2.96574900 | 1.96259300  |
| O     | -4.36364600  | -0.36963100 | 0.62298700  | F     | -5.30262700  | 0.83069000  | 2.81145100  | O     | -1.11404800 | -0.49089600 | 0.95140900  |
| C     | -5.34674100  | 0.24158200  | 1.30533900  | H     | -4.76985400  | 1.62119000  | 2.82822800  | C     | 0.15470900  | -0.24933900 | 0.51525500  |
| C     | -6.69828500  | -0.20121600 | 0.80693100  | F     | -3.71050400  | 2.74956000  | 2.41726300  | C     | 2.73949900  | 0.17643100  | -0.33576200 |
| H     | -7.45480700  | 0.32017900  | 1.39664600  | C     | -3.84114100  | 2.60013800  | 1.47421300  | C     | 0.43914000  | -0.21446000 | -0.85561200 |
| H     | -6.79728900  | -1.27683600 | 0.99336700  | IM2-5 |              |             |             | C     | 1.17112700  | -0.03935100 | 1.45272600  |
| C     | -6.88993300  | 0.06903700  | -0.69686600 | I     | -2.36552800  | 1.12730600  | 0.60178300  | C     | 2.47662200  | 0.17193400  | 1.02690100  |
| H     | -6.75724700  | 1.13947300  | -0.89001500 | C     | -3.82464100  | -0.27149300 | 1.14266400  | C     | 1.74550200  | -0.00619100 | -1.28442600 |
| H     | -6.11350400  | -0.46272800 | -1.25473800 | C     | -5.68150300  | -2.17128200 | 1.85035100  | H     | -0.37100600 | -0.38066700 | -1.56051700 |
| C     | -8.25964000  | -0.37307700 | -1.15022900 | C     | -4.82228600  | -0.59272900 | 0.22827900  | H     | 0.92791100  | -0.07495400 | 2.50927500  |
| C     | -8.46804900  | -1.67466300 | -1.61127500 | C     | -3.71620400  | -0.87740500 | 2.38888700  | H     | 3.28953300  | 3.19698000  | 1.72732700  |
| C     | -9.35157300  | 0.49342700  | -1.06750900 | C     | -4.65909000  | -1.84233600 | 2.73597800  | H     | 1.99778200  | 0.00589100  | -2.33952800 |
| C     | -9.73910400  | -2.10170500 | -1.98513200 | C     | -5.76248900  | -1.54989100 | 0.60507400  | O     | -2.54218100 | -1.29002000 | -1.66431000 |
| H     | -7.62380100  | -2.35673000 | -1.68193000 | H     | -4.84438000  | -0.12787500 | -0.75173100 | C     | -2.67173100 | -2.41507400 | -1.21787200 |
| C     | -10.62435900 | 0.07092100  | -1.44043800 | H     | -2.90611900  | -0.62177000 | 3.06305700  | O     | -2.18491900 | -2.78194000 | -0.03690500 |
| H     | -9.19982200  | 1.50990300  | -0.71152200 | H     | -4.59066800  | -2.33274900 | 3.70119500  | C     | -3.34910100 | -3.54842700 | -1.97803700 |
| C     | -10.82102300 | -1.22891600 | -1.90043500 | H     | -6.55323100  | -1.81917600 | -0.08841800 | C     | -3.9216     |             |             |

|   |             |             |             |
|---|-------------|-------------|-------------|
| C | -4.38518900 | -2.94956700 | -2.93001000 |
| H | -5.18437600 | -2.45162100 | -2.37004500 |
| H | -3.92628800 | -2.20953900 | -3.58894500 |
| H | -4.83421500 | -3.74185200 | -3.53786600 |
| C | -4.00516800 | -4.54729300 | -1.02133200 |
| H | -4.49433600 | -5.33854500 | -1.59959600 |
| H | -3.26680900 | -5.00330500 | -0.35817100 |
| H | -4.76103300 | -4.05622700 | -0.39986600 |
| O | 4.06137800  | 0.37386500  | -0.75829700 |
| C | 4.87650800  | -0.67551200 | -0.70106700 |
| C | 6.31015600  | -0.35345700 | -1.00090800 |
| H | 6.52659300  | -0.70671100 | -2.01674500 |
| H | 6.89395700  | -0.97761200 | -0.31998400 |
| C | 6.68211400  | 1.12510000  | -0.83684200 |
| H | 6.27785800  | 1.70823600  | -1.66986800 |
| H | 6.21674500  | 1.49686600  | 0.07945300  |
| C | 8.17972500  | 1.28654400  | -0.74607800 |
| C | 8.82910100  | 0.95368000  | 0.44714000  |
| C | 8.94059400  | -0.74498000 | -1.82915800 |
| C | 10.21134000 | 1.05971000  | 0.55391300  |
| H | 8.23124700  | 0.61373600  | 1.29063200  |
| C | 10.32632600 | 1.83243200  | -1.72528400 |
| H | 8.44381000  | 1.98856100  | -2.75973100 |
| C | 10.96425400 | 1.50011600  | -0.53401900 |
| H | 10.70290500 | 0.80308100  | 1.48733600  |
| H | 10.90639500 | 2.17864400  | -2.57526100 |
| H | 12.04315200 | 1.58586600  | -0.45111300 |
| O | 4.49691900  | -1.81369900 | -0.45905400 |
| F | 5.61822800  | -0.08238100 | 1.70302100  |
| H | 5.12113700  | -0.56113600 | 2.36814300  |
| F | 2.31876900  | -2.73763100 | 0.14932900  |
| H | 3.16561100  | -2.30623100 | -0.15838900 |
| F | 4.10732700  | -1.13555800 | 3.38166600  |
| H | 3.42505400  | -1.74126400 | 3.02790700  |
| F | 2.35720700  | -2.58666600 | 2.53956200  |
| H | 2.30381600  | -2.65169100 | 1.55294000  |

IM2-7

|   |             |             |             |
|---|-------------|-------------|-------------|
| I | 2.55044800  | -1.05951800 | 0.67942500  |
| C | 4.04742100  | 0.39281300  | 0.84458900  |
| C | 5.95488400  | 2.36137800  | 1.05119600  |
| C | 4.97334600  | 0.52561700  | -0.18474100 |
| C | 4.03455200  | 1.21777800  | 1.96312000  |
| C | 5.00233900  | 2.21543800  | 2.05587900  |
| C | 5.94049000  | 1.52135600  | -0.06136900 |
| H | 4.92089100  | -0.11162300 | -1.06125000 |
| H | 3.27736200  | 1.02201000  | 2.73086500  |
| H | 5.00804600  | 2.87512000  | 2.91706200  |
| H | 6.67662400  | 1.64709700  | -0.84943000 |
| H | 6.70761100  | 3.13932900  | 1.13021800  |
| O | 1.26721600  | 0.60793800  | 0.95771300  |
| C | -0.03420300 | 0.31983800  | 0.66839200  |
| C | -2.68145000 | -0.20886900 | 0.10899900  |
| C | -0.43465900 | 0.10117600  | -0.65553400 |
| C | -0.96506900 | 0.24592200  | 1.70862900  |
| C | -2.30151100 | -0.01432000 | 1.42805900  |
| C | -1.76998600 | -0.16316300 | -0.93634600 |
| H | 0.30960600  | 0.16730600  | -1.44455800 |
| H | -0.63672300 | 0.41220800  | 2.72857600  |
| H | -3.04819900 | -0.05579600 | 2.21023200  |
| H | -2.10738300 | -0.31807200 | -1.95591100 |
| O | 2.45551800  | 1.06051200  | -1.85663900 |
| C | 2.61340800  | 2.23270500  | -1.56868500 |
| O | 2.23249200  | 2.74596100  | -0.40354500 |
| C | 3.20716000  | 3.26116800  | -2.52308500 |
| O | 4.03334600  | -2.51960400 | 0.68101800  |
| C | 4.61148400  | -2.84506000 | -0.47684800 |
| O | 4.37934300  | -2.28020000 | -1.52464400 |
| C | 5.61971600  | -3.98485500 | -0.32125100 |
| H | 1.83388700  | 2.01113800  | 0.13303400  |
| C | 6.18156900  | -4.34163600 | -1.69622000 |
| H | 6.91311600  | -5.15029000 | -1.59688500 |
| H | 5.38639000  | -4.66940600 | -2.37130600 |
| H | 6.67123500  | -3.47873200 | -2.15478400 |
| C | 6.74198000  | -3.49232900 | 0.60561000  |
| H | 7.23304800  | -2.60566600 | 0.18986000  |
| H | 6.34981100  | -3.23961400 | 1.59395300  |
| H | 7.49676300  | -4.27792500 | 0.71725000  |
| C | 4.92139600  | -5.19806900 | 0.30699500  |
| H | 4.10060400  | -5.55128100 | -0.32633100 |
| H | 5.63952900  | -6.01751700 | 0.41715400  |
| H | 4.51897300  | -4.95158400 | 1.29244800  |
| C | 2.01874800  | 3.86806200  | -3.29032800 |
| H | 1.32137300  | 4.35897600  | -2.60467800 |
| H | 2.38432900  | 4.61284300  | -4.00518700 |
| H | 1.47858800  | 3.09338500  | -3.84341600 |
| C | 4.14626300  | 2.54471500  | -3.49400400 |
| H | 4.99802000  | 2.10963900  | -2.95975700 |
| H | 3.62710900  | 1.73574400  | -4.01215400 |
| H | 4.53089300  | 3.25533300  | -4.23286600 |
| C | 3.95094500  | 4.36201100  | -1.76226000 |
| H | 4.37548600  | 5.07576300  | -2.47648700 |
| H | 3.28036700  | 4.89841400  | -1.08736500 |
| H | 4.76809900  | 3.94320400  | -1.16589900 |
| O | -4.03339600 | -0.46661600 | -0.15249900 |
| C | -4.74866100 | 0.49982700  | -0.72975700 |
| C | -6.20364300 | 0.15810900  | -0.86019400 |
| H | -6.59979200 | 0.72592200  | -1.70598700 |
| H | -6.66732700 | 0.57314100  | 0.04460700  |
| C | -6.52126700 | -1.33694000 | -0.98137400 |
| H | -6.01050300 | -1.74911600 | -1.85858300 |

IM2-8

|   |              |             |             |
|---|--------------|-------------|-------------|
| I | 2.35798200   | -0.88768800 | -0.22620300 |
| C | 3.72434100   | 0.22280400  | 0.90368900  |
| C | 5.46621900   | 1.72754700  | 2.40006800  |
| C | 4.82362900   | 0.78631500  | 0.26492100  |
| C | 3.45870700   | 0.39047200  | 2.25774000  |
| C | 4.34787900   | 1.16012500  | 3.00517100  |
| C | 5.70373500   | 1.53980000  | 1.03925300  |
| H | 4.96864200   | 0.65972600  | -0.80262900 |
| H | 2.57636900   | -0.05126500 | 2.70866000  |
| H | 4.16200500   | 1.31147800  | 4.06328700  |
| H | 6.57089300   | 1.99282300  | 0.56843200  |
| H | 6.15406600   | 2.32487900  | 2.99014400  |
| O | 1.01025000   | 0.56716500  | 0.54986700  |
| C | -0.29151300  | 0.45774900  | 0.20975700  |
| C | -3.00520500  | 0.32321600  | -0.31422800 |
| C | -1.00618500  | 1.62069700  | -0.11495000 |
| C | -0.95256700  | -0.77774300 | 0.21098600  |
| C | -2.31368300  | -0.84586000 | -0.05983600 |
| C | -2.36976100  | 1.55714700  | -0.36198700 |
| H | -0.48040100  | 2.56963000  | -0.13529300 |
| H | -0.42421400  | -1.68384300 | 0.48335700  |
| H | -2.83980800  | -1.79088300 | -0.02756100 |
| H | -2.94160600  | 2.45454200  | -0.57511200 |
| O | 2.72678300   | 2.15392700  | -1.41438200 |
| C | 2.72837700   | 3.08537200  | -0.63672900 |
| O | 2.07866200   | 3.05143400  | 0.52964200  |
| C | 3.41880000   | 4.41804100  | -0.89893100 |
| C | 3.86216400   | -2.25960300 | -0.63511800 |
| C | 4.68110100   | -2.02556200 | -1.66330400 |
| O | 4.65072400   | -1.01228300 | -2.32815700 |
| C | 5.67707500   | -3.16609200 | -1.87976200 |
| H | 1.66296100   | 2.15238400  | 0.60369800  |
| C | 6.53098400   | -2.85285200 | -3.10696000 |
| H | 7.25584000   | -3.65788800 | -3.26659500 |
| H | 5.91044000   | -2.75744800 | -4.00208900 |
| H | 7.07267000   | -1.91242200 | -2.97703000 |
| C | 6.55724300   | -3.26259000 | -0.62390900 |
| H | 7.08870300   | -2.32157200 | -0.44443100 |
| H | 5.95492200   | -3.49356900 | 0.25827100  |
| H | 7.30240900   | -4.05382300 | -0.75814900 |
| C | 4.90821800   | -4.47903600 | -2.07829700 |
| H | 4.25574500   | -4.42381300 | -2.95622900 |
| H | 5.61742500   | -5.29857900 | -2.23559400 |
| H | 4.29540100   | -4.71018800 | -1.20374600 |
| C | 2.33517600   | 5.38428800  | -1.40789700 |
| H | 1.55193700   | 5.52177000  | -0.65617400 |
| H | 2.78294600   | 6.36026900  | -1.62342600 |
| H | 1.87717600   | 5.00525800  | -2.32715800 |
| C | 4.48870600   | 4.21269400  | -1.97051900 |
| H | 5.26112000   | 3.52032500  | -1.61865300 |
| H | 4.05467000   | 3.79144400  | -2.87982500 |
| H | 4.96512100   | 5.16901000  | -2.21009300 |
| C | 4.04088200   | 4.96880600  | 0.38853100  |
| H | 4.54614700   | 5.91670700  | 0.17390800  |
| H | 3.27949300   | 5.14160300  | 1.15235500  |
| H | 4.77829400   | 4.27023200  | 0.79743400  |
| O | -4.39258900  | 0.23205500  | -0.50820800 |
| C | -5.17893900  | 0.61646600  | 0.49428100  |
| C | -6.63639900  | 0.36760600  | 0.23311800  |
| H | -7.20154100  | 1.09307600  | 0.82393400  |
| H | -6.84790300  | -0.62003500 | 0.66517700  |
| H | -7.04911500  | 0.39502700  | -1.24379200 |
| H | -6.77928600  | 1.36349100  | -1.67905300 |
| H | -6.48738600  | -0.36781800 | -1.79007100 |
| C | -8.53358700  | 0.15911500  | -1.38477100 |
| C | -9.03857500  | -1.13705100 | -1.50698600 |
| C | -9.43070700  | 1.22842100  | -1.34409700 |
| C | -10.40999700 | -1.36085700 | -1.59015500 |
| H | -8.34873000  | -1.97715200 | -1.54283800 |
| C | -10.80284100 | 1.00968600  | -1.42750500 |
| H | -9.04815700  | 2.24254500  | -1.25208800 |
| C | -11.29587600 | -0.28694600 | -1.55069300 |
| H | -10.78657900 | -2.37407200 | -1.69000100 |
| H | -11.48687800 | 1.85218200  | -1.40004400 |
| H | -12.36522800 | -0.45945800 | -1.61877700 |
| O | -4.77499600  | 1.11471100  | 1.53266500  |

|   |             |             |            |
|---|-------------|-------------|------------|
| F | -4.05853100 | -1.40757400 | 2.11461500 |
| H | -3.43143900 | -2.12053800 | 2.07158000 |
| F | -2.58510500 | 0.87105800  | 2.59843200 |
| H | -3.46117900 | 0.91591400  | 2.11133600 |
| F | -2.51710600 | -3.39987400 | 1.59692700 |
| H | -1.57155700 | -3.39323500 | 1.75636800 |
| F | -1.65515100 | -1.23320200 | 2.35051900 |
| H | -2.14253900 | -0.37394700 | 2.83594700 |
| F | -0.00068300 | -3.48949200 | 1.77551900 |
| H | 0.39931700  | -2.71138000 | 2.20166300 |
| F | 0.68818500  | -1.37292300 | 2.75920800 |
| H | -0.26248600 | -1.14082600 | 2.93014700 |

IM2-9

|     |             |             |             |
|-----|-------------|-------------|-------------|
| I   | 2.50886600  | -0.77772700 | -0.15811600 |
| C   | 3.83739400  | 0.39745000  | 0.94870500  |
| C   | 5.50822600  | 2.00126200  | 2.42394200  |
| C   | 4.84574000  | 1.08647100  | 0.28323700  |
| C   | 3.62871700  | 0.48718300  | 2.32028200  |
| C   | 4.48017200  | 1.30781000  | 3.05709500  |
| C   | 5.69150800  | 1.88900800  | 1.04653200  |
| H   | 4.94697500  | 1.01393500  | -0.79427600 |
| H   | 2.81453600  | -0.05204100 | 2.79301400  |
| H   | 4.33617000  | 1.40021800  | 4.12845100  |
| H   | 6.48830400  | 2.43893800  | 0.55498600  |
| H   | 6.16742900  | 2.63793800  | 3.00551800  |
| O   | 1.08614400  | 0.54600900  | 0.17210000  |
| C   | -0.18814200 | 0.40779000  | 0.29260100  |
| C   | -2.84166000 | 0.18293900  | -0.44982800 |
| C   | -0.90098400 | 1.54116400  | -0.12279600 |
| C   | -0.81820900 | -0.84400500 | 0.28820900  |
| C   | -2.14953900 | -0.96046200 | -0.08969400 |
| C   | -2.23800600 | 1.43189500  | -0.48727700 |
| H   | -0.39846400 | 2.50261200  | -0.13251400 |
| H   | -0.27993900 | -1.72156900 | 0.62358100  |
| H   | -2.65825300 | -1.91489100 | -0.08146600 |
| H   | -2.81557100 | 2.30237400  | -0.77128400 |
| O   | 2.53050700  | 2.32871800  | -1.25183400 |
| C   | 2.55405400  | 3.21862800  | -0.42677300 |
| O   | 2.01775500  | 3.08732700  | 0.78902000  |
| C   | 3.13362700  | 4.60409500  | -0.68388700 |
| O   | 4.08366000  | -2.02661000 | -0.67484400 |
| C   | 4.84673700  | -1.69471600 | -1.71917600 |
| O   | 4.72609700  | -0.65772200 | -2.33540400 |
| C   | 5.90420100  | -2.75713700 | -2.02288100 |
| H   | 1.65850900  | 2.16284200  | 0.84695400  |
| C   | 6.68837900  | -2.33583400 | -3.26425300 |
| H   | 7.45605500  | -3.08428100 | -3.48664100 |
| H   | 6.02877000  | -2.24216000 | -4.13119100 |
| H   | 7.17404600  | -1.36874100 | -3.11069700 |
| C   | 6.83661100  | -2.85058000 | -0.80508100 |
| H</ |             |             |             |

H 0.00849500 -1.26206400 2.98965900  
F -4.95122900 -2.61260800 0.02950900  
H -4.30680800 -3.29203900 -0.20174300

IM2-10

I 1.43499800 0.44160900 -0.88180600  
C 3.48404000 0.85203900 -0.75870600  
C 6.19160500 1.32734400 -0.58834300  
C 3.95059200 1.70378200 0.23744800  
C 4.33270100 0.21264400 -1.65467800  
C 5.70167500 0.45673800 -1.55739400  
C 5.31973700 1.94514200 0.30800000  
H 3.26331600 2.16970900 0.93417400  
H 3.93983000 -0.46940600 -2.40138300  
H 6.38055700 -0.03447200 -2.24640500  
H 5.70444300 2.61210500 1.07278000  
H 7.25800000 1.51795900 -0.52238700  
O 1.94160500 -1.57164300 -1.27735100  
C 0.70986100 -2.19138600 -1.23752200  
C -1.95748400 -2.92619100 -1.15049700  
C 0.09488700 -2.41847900 -0.00157900  
C 0.01244600 -2.42594700 -2.42154800  
C -1.32572200 -2.81219700 -2.38662200  
H -1.24181200 -2.78774000 0.03697700  
C 0.65605800 -2.22216500 0.90843800  
H 0.51431400 -2.25560100 -3.36870700  
H -1.88567600 -2.95074200 -3.30025100  
H -1.76456000 -2.90886800 0.97985600  
O 2.77604900 -0.98359900 1.65485500  
C 3.76084700 -1.67247500 1.46330100  
O 3.93751600 -2.37893100 0.34982000  
C 4.89260000 -1.84739600 2.46610700  
O 1.18799800 2.53702100 -0.48295000  
C -0.08348700 2.79597000 -0.36337000  
O -0.92658100 1.90570100 -0.53395200  
C -0.48563600 4.21889700 0.00269900  
H 3.17141300 -2.18798700 -0.25371700  
C -1.23384500 4.13730600 1.34484300  
H -1.55653200 5.14141100 1.63797900  
H -2.11802900 3.50219700 1.25034700  
H -0.58946600 3.74106900 2.13681700  
C 0.73055200 5.13604200 0.11078800  
H 1.42224200 4.78825200 0.88343100  
H 1.27707400 5.18503500 -0.83520100  
H 0.39986800 6.14601100 0.37287700  
C -1.45596800 4.71338600 -1.08239200  
H -2.33543700 4.06690700 -1.13124900  
H -1.78438000 5.72815100 -0.83614400  
H -0.97468300 4.73952500 -2.06559500  
C 4.74348000 -0.80278300 3.57031200  
H 3.77570800 -0.89467000 4.06906700  
H 5.53842300 -0.93052000 4.31221100  
H 4.81207400 0.20868600 3.15665900  
C 6.24286100 -1.69046900 1.75620600  
H 6.36038300 -2.43461900 0.96503700  
H 6.33349200 -0.69553400 1.30787300  
H 7.05404900 -1.81638000 2.48138300  
C 4.77304600 -3.26598200 3.04798300  
H 5.57149800 -3.43054000 3.77916300  
H 3.81224800 -3.40185800 3.55512600  
H 4.86146100 -4.01918600 2.26023200  
O -3.32120100 3.12042700 -0.99184700  
C -4.18754400 -2.33613300 -1.71389400  
C -5.40454700 -2.01261600 -0.89100800  
H -5.83133700 -2.93224100 -0.47924200  
H -6.13777300 -1.53611400 -1.54406300  
C -4.98425100 -1.05951600 0.24983500  
H -4.32744500 -1.61062700 0.93343600  
H -4.39714900 -0.23007800 -0.16083000  
C -6.16431400 -0.49103200 1.00236100  
C -6.31825500 0.89201700 1.11795700  
H -7.11319800 -1.32791500 1.59679200  
C -7.40330400 1.42038100 1.80979400  
H -5.57241700 1.54481100 0.67164700  
C -8.19769600 -0.79560500 2.28660000  
H -7.00056200 -2.40745900 1.52509300  
C -8.34708400 0.58584700 2.39286200  
H -7.51014200 2.50380300 1.89178500  
H -8.92591400 -1.45899000 2.74344800  
H -9.19345700 1.00277900 2.92986400  
O -3.94886000 -1.91662400 -2.81165300  
F -3.45860300 2.19706300 -0.19523400  
H -2.52189900 2.04073100 -0.33566900

IM2-11

I 1.83275200 0.54923000 -0.86071500  
C 3.91736000 0.50981000 -0.69004400  
C 6.65841400 0.37816000 -0.45982300  
C 4.52408300 1.10879400 0.40943400  
C 4.63781100 -0.17352900 -1.66271700  
C 6.02429900 -0.23883600 -1.53426700  
C 5.91097500 1.04644200 0.50979000  
H 3.92999500 1.61146200 1.16401600  
H 4.13218000 -0.65591600 -2.49284500  
H 6.60412200 -0.77029000 -2.28139000  
H 6.40578400 1.51359900 1.35518400  
H 7.73886500 0.32965600 -0.36971600  
O 1.89346800 -1.45684900 -1.45595700  
C 0.55111800 -1.79912600 -1.46383500  
C -2.20339000 -2.01400000 -1.43946600  
C -0.11797300 -1.97033200 -0.24790500

C -0.15368500 -1.79932100 -2.66666600  
C -1.54020700 -1.92254900 -2.65963800  
C -1.50234100 -2.07349300 -0.23943900  
H 0.45616800 -1.95050100 0.67500000  
H 0.39004800 -1.66220300 -3.59586200  
H -2.10666300 -1.88443900 -3.58091100  
H -2.06031600 -2.14039700 0.68787300  
O 2.78938500 -1.35566200 1.52111000  
C 3.60769500 -2.21762500 1.25950700  
O 3.65684800 -2.82558600 0.07695500  
C 4.64723400 -2.73823500 2.24189800  
O 2.00384500 2.61194200 -0.19782400  
C 0.81063600 3.07965100 -0.01910000  
O -0.18191300 2.40133300 -0.34204300  
C 0.65715900 4.44914400 0.62628800  
H 2.95835500 -2.42063400 -0.50070100  
C 0.00533100 4.20475000 2.00018100  
H -0.14778300 5.16525700 2.50207600  
H -0.96500700 3.71453600 1.88444100  
C 0.64404700 3.58388100 2.63726500  
C 2.00704400 5.14599600 0.78229900  
H 2.68529000 4.56018800 1.40859000  
H 2.48921100 5.29865400 -0.18749800  
H 1.85811300 6.12302300 1.25248200  
C -0.29568100 5.28045900 -0.24568500  
H -1.26846700 4.79081200 -0.33590600  
H -0.44536900 6.26061600 0.21758000  
O 0.11541600 5.43576100 -1.24832000  
C 4.71418600 -1.79378400 3.44045400  
H 3.73925100 -1.70654000 3.92578800  
H 5.44076500 -2.16881300 4.16848400  
H 5.02276800 -0.79140900 3.12557600  
C 6.01447500 -2.83229100 1.55396000  
H 5.97825700 -3.50773900 0.69615800  
H 6.34236400 -1.84828600 1.20273500  
H 6.75674900 -3.20783000 2.26647900  
C 4.19152900 -4.13846900 2.68625900  
H 4.91319200 -4.54896400 3.40031900  
H 3.21315500 -4.09514700 3.17568700  
H 4.12414600 -4.81619300 1.83075600  
O -3.58167100 -2.03440000 -1.33802100  
C -4.27607300 -0.97607500 -1.86099300  
H -5.66413200 -0.82551500 -1.27797900  
H -6.38034500 -1.27276800 -2.03242400  
H -5.83608900 0.19707800 -1.15553500  
C -5.87268300 -1.60379500 0.05573500  
H -5.97037800 -2.68052100 -0.11448900  
H -4.98481900 -1.44971500 0.67344700  
C -7.08101600 -1.06199800 0.77842900  
C -6.97875800 0.16592200 1.44115100  
C -8.30635100 -1.72714300 0.77865500  
C -8.07870900 0.71377200 2.09138400  
H -6.01861000 0.67804300 1.43654300  
C -9.41129600 -1.18085400 1.42981100  
H -8.39487900 -2.68323900 0.26807900  
C -9.30003500 0.04050600 2.08739400  
H -7.98434100 1.66544300 2.60582600  
H -10.35866400 -1.71158100 1.42428600  
H -10.15926200 0.46608200 2.59650700  
C -3.82591400 -0.23680800 -2.69193600  
O -3.66304000 0.44396500 0.34352700  
F -3.27237300 1.31172200 0.28610100  
F -2.53045200 2.74730700 0.30361100  
H -1.59380300 2.63631000 0.01328000

IM2-12

I -2.05272100 0.82663400 0.27271400  
C -3.74947600 1.90842200 0.81690600  
C -5.98199100 3.35268900 1.53505600  
C -4.96772600 1.59965600 0.21515500  
C -3.62067700 2.91908500 1.76912000  
C -4.75248200 3.64638200 2.12264200  
C -6.08990900 2.33553700 0.58985100  
H -5.03335700 0.79867800 -0.51400200  
H -2.65894000 3.13550800 2.22229500  
H -4.67316900 4.43875400 2.85942200  
H -7.05010500 2.11196600 0.13687400  
H -8.66218700 3.92113600 1.81782200  
C -2.40610100 -0.84629900 1.52530300  
C -1.13641700 -1.39465600 1.45117100  
H -1.54952200 -1.89397200 0.97263200  
C -0.73598400 -2.04110700 0.27992600  
C -0.18813800 -1.07554400 2.42829900  
C 1.15094900 -1.33591700 2.19100000  
C 0.61130000 -2.30074600 0.02753600  
H -1.48561600 -2.28173900 -0.47035400  
H -0.51036800 -0.56744000 3.33142400  
H 1.92645400 -1.05323600 2.89532000  
H 0.92320100 -2.75649500 -0.89987200  
O -4.26583700 -1.23954800 -0.95311400  
C -4.56189500 -2.32369900 -0.48117600  
O -4.15315700 -2.71686500 0.71842300  
C -5.40255800 -3.37156800 -1.19677800  
O -1.39013500 -2.58748800 -0.87495100  
C -0.21668000 2.30514600 -1.32343500  
O 0.20049100 1.12488000 -1.28102200  
C 0.66933400 3.44413200 -1.80137000  
H -3.57061000 -2.00023400 1.09209500  
C 1.56430900 2.95105900 -2.94318100  
H 2.21482600 3.76799600 -3.26983400  
H 2.19671700 2.11984800 -2.62302600

H 0.96888200 2.62428000 -3.80145700  
C -0.17030700 4.64358600 -2.24064900  
H -0.81040000 4.38734800 -3.09045400  
H -0.80912200 4.99725000 -1.42824900  
H 0.49369700 5.45868200 -2.54485600  
C 1.53713300 3.81259300 -0.58045200  
H 2.11346600 2.95347000 -0.22340500  
H 2.23678900 4.60561900 -0.86253500  
H 0.91558200 4.17988900 0.24269900  
C -5.90772900 -2.79760200 -2.51857300  
H -5.07486000 -2.49418300 -3.15803500  
H -6.49975100 -3.55198500 -3.04646500  
H -6.53645000 -1.91841600 -2.35005200  
C -6.57921600 -3.77161400 -0.29523000  
H -6.22478000 -4.18026500 0.65388100  
H -7.22369000 -2.91185400 -0.08324400  
H -7.18390500 -4.53159200 -0.80087300  
C -4.50671100 -4.59512200 -1.45051400  
H -5.08260600 -5.36895800 -1.96857900  
H -3.65051300 -4.33112500 -2.08059100  
H -4.13268300 -5.00764600 -0.51014600  
O 2.91720400 -1.90571500 0.81527000  
C 3.59165600 -2.53334200 -0.18654400  
H 5.05598400 -2.20198500 -0.05941700  
H 5.62082400 -2.91213100 -0.66678500  
H 5.34386500 -2.29916200 0.99151000  
C 5.34479100 -0.75688000 -0.51184500  
H 5.06115900 -0.63828300 -1.56284900  
H 4.72292900 -0.07394000 0.07069400  
C 6.79880600 -0.41253900 -0.30682500  
H 7.25268400 -0.05758500 0.96730800  
C 7.71329400 -0.47881300 -1.35812400  
H 8.59719400 0.23029200 -1.17965400  
H 6.53716900 -0.01359700 1.78551100  
C 9.05997200 -0.19114700 -1.14663300  
H 7.36578400 -0.75443500 -2.35110800  
C 9.50459100 0.16502000 0.12340500  
H 8.93812000 0.50897800 2.17222400  
H 9.76046700 -0.24300200 -1.97469900  
H 10.55315000 0.39173800 -0.29010700  
O 3.08003500 -3.22516400 -1.02492600  
F 4.42518700 -0.49841000 2.62560700  
H 3.84710100 -0.02441300 2.04822200  
F 2.88145700 0.93500600 1.11611300  
H 2.70901900 0.55460300 0.23605700  
F 2.41161300 0.19098100 -1.15524600  
H 1.49205200 0.58980200 -1.30478500

IM1-13

I -2.06204400 0.61452000 0.37112500  
C -3.98272100 0.04270400 0.96792300  
C -6.49260300 -0.79560700 1.72848100  
C -5.04882400 0.25661200 0.10028800  
C -4.13120500 -0.59379900 2.19392200  
C -5.40525100 -1.01814100 2.56799400  
C -6.31503000 -0.16218300 0.49848300  
H -4.89366700 0.73265600 -0.86130800  
H -3.27399000 -0.77288900 2.83400700  
H -5.54148100 -1.52035100 3.51981300  
H -7.16192000 -0.00191700 -0.16115100  
H -7.48243100 -1.12507800 2.02764600  
O -1.46973800 -1.24578500 1.04021600  
C -0.13208900 -1.42665900 0.73396800  
C 2.54633100 -1.67105900 0.11631100  
C 0.24503600 -1.72073100 -0.57555200  
C 0.82481600 -1.25686500 1.73296000  
C 2.17356500 -1.38549000 1.42898200  
C 1.59535600 -1.84933300 -0.88160700  
H -0.52511200 -1.83206300 -1.33472100  
H 0.50116000 -0.101701400 -2.74076300  
H 2.93482700 -1.24722100 2.18593400  
H 1.92638400 -2.06805900 -1.89084100  
C -3.16265800 -1.71890700 -1.49865300  
C -3.66094000 -2.68840200 -0.95731100  
O -3.24792600 -3.14162200 0.22345700  
C -4.77323100 -3.52980400 -1.56722000  
O -3.08243300 2.51779300 -0.06771900  
C -2.25569900 3.32963000 -0.61986300  
O -1.13976600 2.92065300 -1.00537900  
C -2.63360800 4.79902900 -0.72755500  
H -2.53032700 -2.53709900 0.54159800  
C -2.24910300 5.30653200 -2.12288200  
H -2.48188800 6.37316300 -2.19734300  
H -1.18073200 5.17449100 -2.31326700  
H -2.80602800 4.77982600 -2.90415300  
C -4.12270000 5.01035700 -0.46055600  
H -4.73418800 4.48035700 -1.19698600  
H -4.40152400 4.65068900 0.53278200  
H -4.35582900 6.07778100 -0.52433200  
C -1.78392100 5.51851100 0.33825100  
H -0.71645300 5.33976200 1.76464400  
H -1.96754700 6.59591100 0.28276000  
H -2.04660800 5.17793300 1.34523300  
C -5.45537500 -2.72235100 -2.76501000  
H -4.73404700 -2.40817400 -3.42824900  
H -6.23233400 -3.32802700 -3.14793900  
H -5.92329700 -1.82214200 -2.25751100  
C -5.78611000 -3.93880100 -0.49216400  
H -5.31113400 -4.53309000 0.29150200  
H -6.23859300 -3.05744500 -0.02556800  
H -6.58354500 -4.53384300 -0.94994800

C -4.10641000 -4.78419800 -2.15853300  
H -4.86872700 -5.42269300 -2.61712300  
H -3.37731500 -4.51262500 -2.92862700  
H -3.59537200 -5.35778800 -1.37997700  
O -3.87185800 -1.68281400 -0.26609500  
C -4.77989200 -2.34868600 0.51081000  
C 6.20019400 -1.97862500 0.15978500  
H 6.69588600 -2.87574100 -0.22858000  
H 6.67596600 -1.75597300 1.11994000  
C 6.36479100 -0.79277500 -0.79606100  
H 6.08339800 -1.08540600 -1.81272900  
H 5.67802000 -0.00514800 -0.47925100  
C 7.77953200 -0.27001500 -0.76277800  
C 8.18934800 0.51729700 0.31846600  
C 8.70491000 -0.57721300 -1.75964900  
C 9.49514700 0.98844000 0.39778200  
H 7.46422100 0.75402700 1.09477200  
C 10.01469900 -0.10659700 -1.68382000  
H 8.39535600 -1.18734500 -2.60494000  
C 10.41275500 0.67722900 -0.60512000  
H 9.79844500 1.60203500 1.24077200  
H 10.72324800 -0.35165800 -2.46935900  
H 11.43202400 1.04611200 -0.54551300  
O 4.46443400 -3.13826300 1.35658500  
F 4.93552000 0.01663300 1.78549800  
H 4.17674100 0.58866900 1.84783300  
F 2.82684700 1.42248300 2.04910500  
H 2.20563400 1.36320000 1.31473000  
F 1.20000900 1.50290400 0.16668000  
H 1.26133100 2.40181400 -0.22424000  
F 1.07869100 3.72836400 -0.80611000  
H 0.11066100 3.55486900 -1.01770300

IM1-14

I -1.46118400 0.29193600 0.65069400  
C -3.51850300 0.66831100 0.71809900  
C -6.24701600 1.03339200 0.75828900  
C -4.11193100 1.38168500 -0.31794500  
C -4.24931700 0.12835300 1.76880600  
C -5.62903700 0.31921700 1.77889500  
C -5.49163300 1.56419700 -0.28588100  
H -3.51295400 1.79071800 -1.12431400  
H -3.76213100 -0.45407600 2.54293700  
H -6.21866700 -0.10792800 2.58267100  
H -5.97507300 2.11730900 -1.08541800  
H -7.32340500 1.16960100 0.76896100  
O -1.96170000 -1.68211700 1.12731800  
C -0.74910300 -2.34157500 1.14325600  
C 1.89862300 -3.08977600 1.13963300  
C -0.12916400 -2.67132600 -0.06587400  
C -0.08189300 -2.51705600 2.35219000  
C 1.25353300 -2.90777600 2.35614600  
C 1.20702900 -3.04334300 -0.06564500  
H -0.67759600 -2.55118500 -0.99636700  
H -0.58370700 -2.25406700 3.27636400  
H 1.80956600 -2.96262400 3.28328000  
H 1.74401300 -3.21876900 -0.99162900  
O -5.35797300 -1.98995900 -0.25744500  
C -4.67522000 -1.88764100 -1.24925800  
O -3.33374200 -1.94642900 -1.21437100  
C -5.21529000 -1.73551300 -2.66632800  
O -1.34171800 2.41652800 0.15750300  
C -0.18934800 2.71512200 -0.32377700  
O 0.62738600 1.80639600 -0.59290800  
C 0.14580200 4.18391600 -0.53840400  
H -3.04817800 -2.05803100 -0.27569600  
C 0.87402300 4.32603300 -1.88188700  
H 1.12326100 5.37883800 -2.04576000  
H 1.80256400 3.75000700 -1.89004800  
H 0.24690700 3.99013200 -2.71398100  
C -1.12023200 5.03968200 -0.51064300  
H -1.81236400 4.74926700 -1.30726100  
H -1.64128600 4.94219200 0.44449500  
H -0.84998500 6.09007900 -0.65693200  
C 1.09365900 4.59325100 0.60399200  
H 1.99592800 3.97637500 0.60640400  
H 1.39170400 5.63645800 0.45980100  
H 0.60571600 4.49627400 1.57709800  
C -4.94440600 -3.05936200 -3.40106000  
H -5.43224700 -3.89627200 -2.89104000  
H -5.34153100 -3.00175200 -4.42005000  
H -3.87163300 -3.26342900 -3.45593400  
C -4.49652200 -0.59098800 -3.39129900  
H -4.69811800 0.36737400 -2.90171500  
H -3.41554500 -0.75123900 -3.40953900  
H -4.85800300 -0.52647400 -4.42320900  
C -6.71640200 -1.46424000 -2.59336100  
H -7.12647200 -1.36291100 -3.60355600  
H -7.23531700 -2.27741500 -2.08016200  
H -6.91514700 -0.54161800 -2.03877300  
O 3.28237000 -3.21009900 1.04659100  
C 4.00198200 -2.14133900 1.50909900  
C 5.26611100 -1.96237800 0.72034600  
H 5.77359700 -2.91871800 0.56922500  
H 5.91848800 -1.28080600 1.26864700  
C 4.85290600 -1.34416300 -0.63768600  
H 4.33037700 -1.21223500 -1.21972800  
H 4.13438100 -0.53569700 -0.45824400  
C 6.03199300 -0.80668600 -1.41074900  
C 6.11022400 0.55151800 -1.72300600  
C 7.06654000 -1.65346600 -1.81913900

C 7.20313000 1.05447800 -2.42591000  
H 5.30060400 1.21148500 -1.42177400  
C 8.15915000 -1.15346600 -2.51972300  
H 7.01291500 -2.71579900 -1.59112100  
C 8.23112200 0.20488900 -2.82356500  
H 7.24965100 2.11301600 -2.66282000  
H 8.95415700 -1.82393000 -2.83161500  
H 9.08321600 0.59662900 -3.37016200  
O 3.60357500 -1.38246500 2.35306300  
F 1.66170700 -0.09293400 1.00598800  
H 1.83669200 -0.42031600 1.88053100  
F 1.02035000 -0.08646200 3.47783800  
O 7.77754800 0.77925800 3.15642400  
F 3.04817300 2.12515800 1.71590600  
C 3.11002500 1.95662100 0.73570500  
H 2.98047300 1.94836700 -0.64677600  
H 1.93390300 1.89910000 -0.71471400  
F 0.71311000 2.10475500 2.30947500  
H 1.66213800 2.10351700 2.03668600

IM1-15

I -2.01428300 0.41263600 -0.66163200  
C -3.98968400 -0.26073300 -0.68719900  
C -6.56329300 -1.23151600 -0.74285100  
C -4.49555900 -0.74258100 -1.88890400  
C -4.72657200 -0.25986900 0.49325400  
C -6.03120500 -0.74269900 0.45062700  
C -5.79739100 -1.24023400 -1.90477900  
H -3.88762900 -0.74630200 -2.78779700  
H -4.28938400 0.09374100 1.42030600  
H -6.62723100 -0.74964800 1.35763400  
H -6.20927100 -1.62793300 -2.83031300  
H -7.57839100 -1.61485500 -0.76295900  
O -1.49853700 -1.30962500 -1.61378800  
C -0.11352000 -1.46022900 -1.56003300  
C 2.63525500 -1.65564400 -1.43925600  
C 0.63444600 -1.25943000 -2.71552300  
C 0.50298400 -1.76185800 -0.34518500  
C 1.88531500 -1.86133800 -0.28201900  
C 2.01983500 -1.37210200 -2.65423500  
H 0.12846300 -1.05159400 -3.64391100  
H -0.10571400 -1.89699300 0.54525900  
H 2.38065700 -2.07093700 0.65490000  
H 2.63677600 -1.21334400 -3.53167500  
O -2.45104400 -2.14864200 1.21527900  
C -3.00432200 -3.12146600 0.73809900  
O -2.92196600 -1.42743900 -0.55569600  
C -3.81421700 -4.12722500 1.54190000  
O -2.87489900 2.15479000 0.51398300  
C -2.59896000 3.31945500 0.15382800  
O -2.32688100 3.53240700 -1.09275100  
C -2.58687900 4.44771800 1.16783600  
H -2.36478600 -2.73800100 -0.99059800  
C -3.22155500 5.70801500 0.56113000  
H -3.26259900 6.48246600 1.33233300  
H -2.63439900 6.10219400 -0.27115200  
H -4.24403700 5.51631400 0.22024000  
C -3.35123200 4.01383600 2.42042400  
H -4.39886500 3.79619000 2.19101100  
H -2.90354600 3.12379700 2.86761600  
H -3.31976500 4.82531800 3.15303200  
C -1.10825400 4.71297700 1.52294800  
H -0.52916600 4.99438200 0.64209200  
H -1.07349700 5.54307300 2.23488000  
H -0.64441800 3.83759600 1.98367600  
C -2.90960600 -5.35353300 1.75819600  
H -2.00223200 -5.08737700 2.30507800  
H -3.44858700 -6.10597100 2.34303400  
H -2.61971200 -5.79824600 0.80211000  
H -5.07227600 -4.54004300 0.76935500  
H -5.71036000 -3.67312600 0.56729400  
H -4.81476900 -5.00447800 -0.18510100  
H -5.64606800 -5.25760400 1.36527200  
H -4.18734300 -3.50014500 2.88429100  
H -4.73913300 -4.22473100 3.49151100  
H -3.29555000 -3.18507900 3.43068900  
H -4.82082000 -2.61865900 2.73700700  
O 4.01037700 -1.60323400 -1.41179300  
C 4.70276300 -2.47961700 -0.62058000  
C 6.11249300 -2.00967300 -0.35930500  
H 6.80027500 -2.71294700 -0.84299800  
H 6.25042200 -2.13579400 0.71902800  
C 6.41692300 -0.56281100 -0.76269900  
H 6.49593700 -0.48363000 -1.85170800  
H 5.57753900 0.06115800 -0.44791200  
C 7.68193700 -0.07777900 -0.09890500  
F 7.64530700 0.28632100 1.25132700  
H 8.89719600 -0.01400400 -0.77978400  
C 7.79897500 0.70720600 1.90349700  
H 6.69463000 0.23433700 1.77849600  
C 10.05568200 0.40778700 -0.12947900  
H 8.93542200 -0.29312100 -1.83016600  
C 10.00923600 0.76937100 1.21348200  
H 8.75511500 0.99106900 2.95072000  
H 10.99409100 0.45592900 -0.67384700  
H 10.01022900 1.09997700 1.72092300  
C 4.22995300 -3.50141600 -0.20742000  
F 4.21883000 -0.66541800 1.32516300  
H 3.37614100 -0.41734400 1.69814900  
F 1.91062800 -0.16126210 2.25856400  
H 1.49842000 0.66461600 2.18520800

F 0.88186200 4.17752800 -1.09947500  
H -0.08102400 4.98776700 -1.48049400  
F -0.94234600 5.50707500 -1.66506200  
H -1.90140500 4.42793300 -1.30207200  
F 0.83013300 1.95997000 2.06158700  
H 0.49024000 2.12985300 1.12124000  
F -0.05296800 2.36108900 -0.06150800  
H 0.47486200 3.30538700 -0.63007000

IM1-16

I -1.82749200 0.32260100 -0.14048100  
C -3.72252900 1.05651000 0.28032100  
C -6.22418500 2.00256600 0.89750700  
C -4.65858100 1.17432400 -0.74538400  
C -3.99309900 1.39904800 1.60342100  
C -5.27048100 1.86735300 1.90384800  
C -5.92018300 1.66506600 -0.42159000  
H -4.41359900 0.87182200 -1.75742800  
H -3.22836300 1.30094000 2.36910600  
H -5.51328500 2.13386300 2.92692400  
H -6.66844600 1.77348700 -1.20051000  
H -7.21380200 2.37555400 1.14128800  
O -2.14912700 -1.45787600 0.80730100  
C -0.86695400 -2.00374300 0.84384100  
C 1.81198500 -2.64875400 0.67070500  
C -0.43214300 -2.82303800 -0.19627000  
C 0.01909500 -1.55650500 1.81926900  
C 1.36805000 -1.87724300 1.74524000  
C 0.91415400 -3.15954900 -0.26729800  
H -1.13770200 -3.13916100 -0.59525200  
H -0.34023500 -0.88598100 2.58909200  
H 2.05544900 -1.48467600 2.48012600  
H 1.30054500 -3.75843400 -1.08461000  
O -3.84489300 -1.57941500 -1.71147100  
C -4.70794900 -2.17145600 -1.09011800  
O -4.51701000 -2.62648500 0.14493600  
C -6.09589000 -2.48834300 -1.62875900  
O -1.34899800 2.40213200 -1.07168500  
C -0.11659100 2.57035500 -1.10425000  
O 0.62994800 1.50303500 -0.10157690  
C 0.52530300 3.92439300 -1.32041100  
H -3.61145200 -2.34913600 0.42804200  
C 1.30622000 3.83844300 0.64646900  
H 1.74110500 4.81870300 -2.86181700  
H 2.12301500 3.11297300 -2.58327100  
H 0.65267900 3.56341800 -3.48047400  
C -0.56198600 4.99409600 -1.39094600  
H -1.25179600 4.80744100 -2.21845800  
H -1.13774200 5.01628800 -0.46206000  
H -0.09460300 5.97204800 -1.53890600  
C 1.50366400 4.28625000 -0.17008400  
H 2.25742200 3.44597900 -0.05246000  
H 2.02258900 5.16264000 -0.40602400  
H 0.97005200 4.34595300 0.77384500  
C -6.16254800 -4.00480100 -1.87477900  
H -5.98585100 -4.55804400 -0.94853700  
H -7.15417600 -4.27038200 -2.25570400  
H -5.41808100 -4.31513400 -2.91520600  
C -6.31097800 -1.72704500 -2.93509900  
H -6.27732200 -0.64541000 -2.76544500  
H -5.53912500 -1.97525000 -3.66752600  
H -7.29082200 -1.97801400 -3.35355900  
C -7.15046000 -2.08397600 -0.58974900  
H -8.15078900 -2.28348800 -0.98826400  
H -7.02355800 -2.64558300 0.33832100  
H -7.08105600 -1.01587800 -0.35535700  
O 3.13923000 -2.83406100 0.35079000  
C 4.14591000 -2.61824800 1.24957400  
C 5.44032000 -2.28235500 0.54562700  
H 6.07817700 -3.17454200 0.54931100  
H 5.93218200 -1.54412200 1.18449100  
C 5.27416000 -1.73485900 -0.87950200  
H 5.00662100 -2.55108400 -1.55830000  
H 4.44477000 -1.02307900 -0.89372900  
C 6.53185700 -1.04327200 -1.34309400  
H 6.64117400 0.34537700 -1.23816500  
C 7.61892800 -1.76891700 -0.83507900  
C 7.81260200 0.99519100 -1.61733900  
H 5.79130700 0.91309800 -0.86669100  
C 8.79210200 -1.12266900 -2.21441700  
H 7.54163200 -2.85030400 -1.92548200  
C 8.89198100 0.26249100 -2.10519200  
H 7.88169000 2.07559400 -1.53428500  
H 9.62777000 -1.69994300 -2.59839400  
H 9.80544800 0.76822300 -2.40223400  
O 4.00346900 -2.69942700 2.43711500  
F 3.83457100 0.06171500 1.12773300  
H 3.47655900 0.25950200 2.03589300  
F 3.10390400 0.39442900 3.38004300  
H 2.13423200 0.53422400 3.50674000  
F 1.68026000 1.39197000 1.46234700  
H 3.33485900 0.96851000 0.08224400  
F 3.17977400 1.46017200 -0.75228000  
H 1.61468100 1.62369600 -0.89056700  
F -1.16505800 1.25503900 3.07003300  
H -0.81146600 2.04407500 2.28927200  
F -0.34305800 2.69206200 1.52132100  
H 0.89136700 1.96796100 1.48570800  
F 0.80366800 0.45897800 4.04071100  
H -0.04899700 0.84686900 3.63855600

## TS1-1

|   |              |             |             |
|---|--------------|-------------|-------------|
| I | 2.25557900   | -0.69367300 | 0.00396400  |
| C | 3.77875900   | 0.46008100  | 0.82641500  |
| C | 5.70868000   | 2.08895800  | 1.90304100  |
| C | 4.71405200   | 1.03416700  | -0.03136700 |
| C | 3.75949000   | 0.69442000  | 2.19715800  |
| C | 4.74638100   | 1.51932200  | 2.73238400  |
| C | 5.69342500   | 1.84879500  | 0.52930800  |
| H | 4.67512800   | 0.84020200  | -1.09671500 |
| H | 2.97643100   | 0.27529200  | 2.81877200  |
| H | 4.75115600   | 1.72318100  | 3.79776500  |
| H | 6.43910200   | 2.30479400  | -0.11386500 |
| H | 6.47094600   | 2.73426000  | 2.32761800  |
| O | 0.82185500   | 0.79974800  | 1.48814700  |
| C | -0.47529900  | 0.50201100  | 1.24321700  |
| C | -3.11593100  | -0.21395500 | 0.73193900  |
| C | -1.32097000  | 1.38240800  | 0.55525800  |
| C | -0.97123500  | -0.73815300 | 1.66406000  |
| C | -2.28845800  | -1.10392100 | 1.40667200  |
| C | -2.63936100  | 1.02226500  | 0.31052100  |
| H | -0.94036100  | 2.34681400  | 0.23508500  |
| H | -0.31442700  | -1.40001300 | 2.22003800  |
| H | -2.67249700  | -2.05795500 | 1.74498700  |
| O | -3.31228400  | 1.69214300  | -0.21469100 |
| O | 1.76523100   | 1.60406500  | -1.04481500 |
| C | 1.77770000   | 2.30479400  | -0.52084100 |
| O | 1.46954200   | 2.97507200  | 0.69455300  |
| C | 2.14959300   | 3.96351400  | -1.36825500 |
| C | 3.38951600   | -2.37711500 | -0.05708000 |
| C | 4.36792400   | -2.43698400 | -0.98573000 |
| O | 4.62768600   | -1.52524000 | -1.73174300 |
| C | 5.09393400   | -3.78061200 | -0.94819800 |
| H | 1.08980400   | 1.85542300  | 1.18586400  |
| C | 6.16699300   | -3.78350900 | -2.03603900 |
| H | 6.69915900   | -4.73994400 | -2.02085800 |
| H | 5.72339500   | -3.64485100 | -3.02550800 |
| H | 6.88849200   | -2.97794400 | -1.87703800 |
| C | 5.73314600   | -3.94605300 | 0.43904300  |
| H | 6.44060400   | -3.13611600 | 0.64537500  |
| H | 4.97329000   | -3.95739000 | 1.22436200  |
| H | 6.28125600   | -4.89311500 | 0.47422400  |
| C | 4.07548700   | -4.90363600 | -1.19219600 |
| H | 3.58621300   | -4.78786600 | -2.16493900 |
| H | 4.59242400   | -5.86867100 | -1.18641700 |
| H | 3.30800500   | -4.91554800 | -0.41445700 |
| C | 0.86594400   | 4.78701000  | -1.55301700 |
| H | 0.46064000   | 5.08714500  | -0.58264400 |
| H | 1.07949100   | 5.68802100  | -2.13849700 |
| H | 0.10426900   | 4.20730500  | -2.08645800 |
| C | 2.70367500   | 3.53028000  | -2.72317300 |
| H | 3.61046800   | 2.92935500  | -2.60010400 |
| H | 1.97700400   | 2.92427600  | -3.26947100 |
| H | 2.95270100   | 4.41204500  | -3.32370600 |
| C | 3.18732400   | 4.79246900  | -0.60174500 |
| H | 3.44685700   | 5.68862000  | -1.17632500 |
| H | 2.79536500   | 5.09413300  | 0.37203100  |
| H | 4.10378000   | 4.21455600  | -0.43667100 |
| O | -4.42672000  | -0.52357600 | 0.37755200  |
| C | -5.27792800  | -1.05216400 | 1.29644700  |
| C | -6.64823200  | -1.22470200 | 0.68654200  |
| H | -7.28763100  | -1.69014900 | 1.43955200  |
| H | -6.56945900  | -1.19042300 | -0.16955500 |
| C | -7.24649100  | 0.11290300  | 0.21388100  |
| H | -7.28740600  | 0.80663300  | 1.06125500  |
| H | -6.58205400  | 0.55258900  | -0.53585100 |
| C | -8.62831800  | -0.08488600 | -0.35876300 |
| C | -8.80493200  | -0.33577700 | -1.72112200 |
| C | -9.75135700  | -0.07237900 | 0.47162100  |
| C | -10.07449900 | -0.56574300 | -2.24420900 |
| H | -7.93752100  | -0.34557100 | -2.37718900 |
| C | -11.02273300 | -0.30158100 | -0.04650000 |
| H | -9.62540500  | 0.12369900  | 1.53402000  |
| C | -11.18747100 | -0.54908600 | -1.40725600 |
| H | -10.19494100 | -0.75408400 | -3.30661900 |
| H | -11.88572500 | -0.28358200 | 0.61198500  |
| H | -12.17842900 | -0.72511700 | -1.81364400 |
| O | -4.97201600  | -1.32649900 | 2.42508700  |

## TS1-2

|   |             |             |             |
|---|-------------|-------------|-------------|
| I | -0.96429800 | -0.19782800 | 0.07505400  |
| C | -2.55078800 | -1.23762100 | -0.83832900 |
| C | -4.62863000 | -2.56838100 | -2.05597500 |
| C | -2.74218900 | -2.58372800 | -0.54514100 |
| C | -3.37224900 | -0.52834300 | -1.70842800 |
| C | -4.42531000 | -1.21505700 | -2.31223200 |
| C | -3.79003300 | -3.25034700 | -1.17597800 |
| H | -2.08423500 | -3.10449500 | 0.14191200  |
| H | -3.22902500 | 0.53438200  | -1.89458800 |
| H | -5.08486400 | -0.67999000 | -2.98749000 |
| H | -3.95265900 | -4.30331200 | -0.96970700 |
| H | -5.44731000 | -3.09343000 | -2.53728500 |
| O | -3.09632000 | 2.63944700  | -1.24869500 |
| C | -1.85239500 | 2.63576100  | -0.93376800 |
| C | 0.91962800  | 2.53465300  | -0.31285600 |
| C | -1.37594400 | 2.65901700  | 0.41916400  |
| C | -0.84841900 | 2.56590100  | -1.95435100 |
| C | 0.49286500  | 2.50159200  | -1.65893000 |
| C | -0.00444200 | 2.67084700  | 0.70673700  |
| H | -2.10150700 | 2.74995700  | 1.21907600  |
| H | -1.18994700 | 2.55201800  | -2.98432400 |
| H | 1.22731500  | 2.43153500  | -2.45159900 |

|   |             |             |             |
|---|-------------|-------------|-------------|
| H | 0.34688000  | 2.71170900  | 1.73331100  |
| O | -3.29164100 | 0.53502300  | 1.25154000  |
| C | -4.46177800 | 0.89818800  | 1.08446400  |
| O | -4.83925800 | 1.80038800  | 0.23795300  |
| C | -5.60111200 | 0.22389300  | 1.84648300  |
| O | 0.13036300  | -1.88750500 | -0.44348800 |
| C | 1.37549500  | -1.80065100 | 0.01739700  |
| C | 1.75373700  | -0.84028800 | 0.66164600  |
| C | 2.24230100  | -2.99511800 | -0.37784200 |
| H | -4.01919900 | 2.20807100  | -0.35234500 |
| C | 2.23804400  | 2.35667400  | 0.07083400  |
| C | 3.27025000  | 2.88449100  | -0.63977500 |
| O | 3.14078200  | 3.61642400  | -1.58339700 |
| C | 4.56866100  | 2.35951200  | -0.08057000 |
| H | 5.38992000  | 2.91406900  | -0.53900000 |
| H | 4.58517400  | 2.52602800  | 1.00121900  |
| C | 4.69619900  | 0.84739800  | -0.35768000 |
| C | 3.79741200  | 0.34645100  | 0.01852100  |
| H | 4.73968400  | 0.68808800  | -1.44205800 |
| C | 5.92309800  | 0.27016900  | 0.30293900  |
| C | 7.17012700  | 0.32037400  | -0.32374700 |
| C | 5.83460800  | -0.28737500 | 1.58139700  |
| C | 8.30521700  | -0.17624200 | 0.31094200  |
| H | 7.24899000  | 0.75037200  | -1.31975900 |
| C | 6.96724800  | -0.78066400 | 2.21910400  |
| H | 4.86334000  | -0.33602100 | 2.06976200  |
| C | 8.20617700  | -0.73084200 | 1.58489100  |
| H | 9.26726100  | -0.13288600 | -0.19035300 |
| H | 6.88208300  | -1.22048900 | 3.21044400  |
| H | 9.09009800  | -1.12073300 | 2.07969800  |
| C | 3.57528100  | -2.91045600 | 0.36354600  |
| C | 3.42669300  | -2.90340800 | 1.44738400  |
| H | 4.19203500  | -3.77631800 | 0.10266100  |
| C | 4.12491200  | -2.00481400 | 0.09422100  |
| C | 1.50724700  | -4.29587000 | -0.02823400 |
| O | 0.55970300  | -4.37097500 | -0.56783600 |
| H | 2.13323600  | -5.15053700 | -0.30359900 |
| H | 1.30377400  | -4.35809800 | 1.04604100  |
| C | 2.46926400  | -2.91145400 | -1.89623500 |
| H | 2.97156200  | -1.97617400 | -2.16518500 |
| H | 3.10748200  | -3.74268700 | -2.21268500 |
| H | 1.52283500  | -2.97077500 | -2.44042700 |
| C | -6.68418400 | 1.24171900  | 2.21308800  |
| H | -7.07553800 | 1.73427900  | 1.32074400  |
| H | -7.50743900 | 0.73486900  | 2.72808800  |
| H | -6.28850100 | 2.01300400  | 2.88209300  |
| C | -6.17180800 | -0.82721100 | 0.87800800  |
| H | -5.39951800 | -1.55222500 | 0.59577500  |
| O | -6.99439500 | -1.36714600 | 1.35988000  |
| C | -6.54971300 | -0.35183700 | -0.03231000 |
| C | -5.05808100 | -0.46542200 | 3.09718200  |
| H | -5.87137400 | -0.98042800 | 3.61937700  |
| H | -4.28830200 | -1.19539600 | 2.83517400  |
| H | -4.61253800 | 0.26048000  | 3.78457100  |

## TS1-3

|   |             |             |             |
|---|-------------|-------------|-------------|
| I | 2.35897900  | -0.63992900 | -0.10029500 |
| C | 3.87826500  | 0.40530500  | 0.80727400  |
| C | 5.80018600  | 2.05052700  | 2.00365200  |
| C | 4.81153300  | 1.09326600  | -0.00481700 |
| C | 3.85685200  | 0.58448900  | 2.19162000  |
| C | 4.83971800  | 1.37204300  | 2.78742000  |
| C | 5.78724100  | 1.86775300  | 0.61574200  |
| H | 4.77363900  | 0.97966100  | -1.08177400 |
| C | 3.07572000  | 0.11607200  | 2.77974500  |
| H | 4.84283200  | 1.49626700  | 3.86499700  |
| H | 6.53154100  | 2.37335900  | 0.00906800  |
| H | 6.55923700  | 2.62087600  | 2.47579000  |
| O | 0.90573600  | 0.71418700  | 1.51055300  |
| C | -0.38468300 | 0.44629800  | 1.21560500  |
| C | -3.01206400 | -0.20483600 | 0.59275100  |
| C | -1.22573200 | 1.40433400  | 0.63089100  |
| C | -0.88317900 | -0.83676400 | 1.47513600  |
| C | -2.19519900 | -1.17459400 | 1.15755000  |
| C | -2.53965500 | 1.07512800  | 0.32860100  |
| O | -0.84404500 | 2.40101600  | 0.43515600  |
| H | -0.23577200 | -1.56229400 | 1.95748500  |
| H | -2.56763100 | -2.16582600 | 1.38243900  |
| H | -3.20913500 | 1.80278300  | -0.11842700 |
| O | 1.85431900  | 1.74943500  | -0.93612100 |
| C | 1.87501300  | 2.83212000  | -0.30632400 |
| O | 1.56906000  | 2.94804500  | 0.92753100  |
| C | 2.25039900  | 4.12694000  | -1.03275600 |
| O | 3.50102900  | -2.30182700 | -0.31135800 |
| C | 4.46870000  | -2.28017000 | -1.25397600 |
| O | 4.70944600  | -1.31107500 | -1.93051800 |
| C | 5.20919500  | -3.61422200 | -1.32436400 |
| H | 1.18501300  | 1.79821400  | 1.30795300  |
| C | 6.26045700  | -3.52826800 | -2.42990400 |
| H | 6.80451000  | -4.47617800 | -2.48999800 |
| H | 5.79573700  | -3.32920300 | -3.39921100 |
| H | 6.97496300  | -2.72559700 | -2.23005300 |
| C | 5.87786300  | -3.86514200 | 0.03617200  |
| H | 6.57989400  | -3.06204700 | 0.28374500  |
| H | 5.13386300  | -3.93586600 | 0.83344700  |
| H | 6.43746000  | -4.80521800 | -0.00422200 |
| C | 4.19969500  | -4.73153600 | -1.62494900 |
| H | 3.68960200  | -4.55649100 | -2.57792500 |
| H | 4.72881400  | -5.68735300 | -1.69539300 |
| H | 3.44821500  | -4.80757800 | -0.83536900 |
| C | 0.96084900  | 4.95165100  | -1.16583400 |

|   |              |              |             |
|---|--------------|--------------|-------------|
| H | 0.53820600   | 5.16368500   | -0.17957000 |
| H | 1.17372000   | 5.90188400   | -1.66774100 |
| H | 0.21334300   | 4.41309200   | -1.75904000 |
| C | 2.83022000   | 3.82071700   | -2.41142800 |
| H | 3.74152600   | 3.21981000   | -2.32649100 |
| H | 2.11884800   | 3.25882100   | -3.02117300 |
| H | 3.07990600   | 4.75443300   | -2.92712200 |
| C | 3.26689800   | 4.89396100   | -0.17879300 |
| H | 3.52554400   | 5.84000100   | -0.66733700 |
| H | 2.85721600   | 5.10420800   | 0.81153200  |
| H | 4.18674700   | 4.31213500   | -0.05086500 |
| O | -4.32769800  | -0.46527300  | 0.18926800  |
| C | -5.20906300  | -1.04192500  | 1.01991700  |
| C | -6.57755700  | -1.10211100  | 0.38998300  |
| H | -7.24853800  | -1.58453500  | 1.10350100  |
| H | -6.51839500  | -1.73013600  | -0.50629900 |
| C | -7.10273600  | 0.29080100   | -0.00377600 |
| H | -7.11721300  | 0.93337700   | 0.88384600  |
| H | -6.41064300  | 0.74101300   | -0.72144800 |
| C | -8.48770000  | 0.19607100   | -0.59525200 |
| C | -8.66483800  | 0.04726000   | -1.97230500 |
| C | -9.61456900  | 0.20426600   | 0.22985900  |
| C | -9.93985900  | -0.08702300  | -2.51497600 |
| H | -7.79421800  | 0.04212300   | -2.62412900 |
| C | -10.89115900 | 0.07035300   | -0.30803100 |
| H | -9.48772100  | 0.32168600   | 1.30372700  |
| C | -11.05680100 | -0.07571300  | -1.68331200 |
| H | -10.06120800 | -0.19652800  | -3.58821400 |
| H | -11.75723200 | 0.088352900  | 0.34638900  |
| H | -12.05172800 | -0.173734700 | -2.01493300 |
| O | -4.94785100  | -1.44561700  | 2.13046500  |
| F | -3.36010300  | -3.39788800  | 2.95355500  |
| H | -3.91965200  | -2.64397400  | 2.86477900  |

C 9.18979800 0.65827100 1.35550700  
C 9.92472300 -2.02066800 1.42852800  
H 7.84780300 -2.43746900 1.04878300  
C 10.51742200 0.30785200 1.58648100  
H 8.90262100 1.70697700 1.32977700  
C 10.88826700 -1.03373800 1.62348600  
H 10.20527600 -3.06899800 1.45876500  
H 11.26179800 1.08307600 1.74017400  
H 11.92222500 -1.30911700 1.80566400  
O 4.90976500 1.01458100 -2.15655400  
F 4.78392600 -1.91867500 -2.27053600  
H 4.36387000 -1.43874600 -2.97930000  
F 3.55971600 -0.32161400 -3.79515800  
H 3.86545500 0.38711100 -3.21732000

TS1-5

I -2.38636500 0.77070100 -0.13184000  
C -4.02201700 -0.10774900 0.80769500  
C -6.12939700 -1.38394600 2.01848000  
C -5.16190600 -0.36751200 0.05004300  
C -3.88979200 -0.48793500 2.13900200  
C -4.96774700 -1.13165800 2.74321000  
C -6.22705100 -1.00481800 0.67976700  
H -5.21083000 -0.07129800 -0.99116000  
H -2.96098600 -0.31997700 2.67235300  
H -4.88929400 -1.44422200 3.77893400  
H -7.13064600 -1.21422600 0.11648200  
H -6.96236200 -1.18895900 2.49620000  
O -1.13106400 -1.10518600 1.09477900  
C 0.15200100 -1.04965400 0.69633300  
C 2.78694700 -0.83831800 -0.13431900  
C 0.71876000 -2.04534700 -0.11666600  
C 0.93128900 0.05324400 1.07741000  
C 2.25237900 0.16392600 0.66003700  
C 2.04153100 -1.94204100 -0.52484100  
H 0.11725400 -2.90214000 -0.40219500  
H 0.49391400 0.79991000 1.73268800  
H 2.88059900 0.99351300 0.96260700  
H 2.49881800 -2.70878000 -1.14202600  
O -2.51318400 -1.49715000 -1.33545500  
C -2.71582000 -2.63949300 -0.86721700  
O -2.31970400 -3.01908500 0.28847600  
C -3.45129900 -3.68968000 -1.70152900  
O -3.11762700 2.65095000 0.06401100  
C -4.15197600 3.00536700 -0.73050500  
O -4.67784500 2.24650700 -1.50648600  
C -4.56361100 4.45740700 -0.49636600  
H -1.67463700 -2.08534700 0.76419100  
C -5.70869300 4.79687000 -1.44951200  
H -6.01976200 5.83418200 -1.29048100  
H -5.40010100 4.67974900 -2.49172500  
H -6.56781500 4.14293600 -1.27912200  
C -5.01946100 4.59757030 0.96438500  
H -5.86184500 3.93170400 1.17944000  
H -4.20549500 4.36398600 1.65512100  
H -5.34578500 5.62694800 1.14385300  
C -3.35572700 5.36872900 -0.75736100  
H -2.99586600 5.26209400 -1.78599800  
H -3.65181100 6.41221600 -0.60936700  
H -2.53396200 5.14034200 -0.07435300  
C -2.41580000 -4.75310900 -2.09846600  
H -1.96676600 -5.20297700 -1.20853000  
H -2.89764600 -5.54257700 -2.68540800  
H -1.61928700 -4.31335600 -2.70898400  
C -4.06411600 -3.05185600 -2.94587100  
H -4.79231600 -2.28187600 -2.67123600  
H -3.29755600 -2.57777900 -3.56340000  
H -4.57662500 -3.81510800 -3.54133000  
C -4.54063500 -4.32938600 -0.83163600  
H -5.06662500 -5.10180100 -1.40347900  
H -4.10477700 -4.78225900 0.06156500  
H -5.27422400 -3.58068600 -0.51176200  
O 4.12400600 -0.71665600 -0.54156800  
C 5.04860700 -1.26738700 0.24130200  
C 6.45532200 -0.91232400 -0.14353900  
H 6.88685500 -1.76484000 -0.68245400  
H 7.00006600 -0.82760300 0.80019500  
C 6.58195100 0.37896800 -0.96056600  
H 6.21503600 0.21499900 -1.97823300  
H 5.94327900 1.13779000 -0.50088400  
C 8.01252300 0.85766600 -0.97716000  
C 8.52726600 1.51457300 0.14489300  
C 8.85144900 0.62885100 -2.06742600  
C 9.85211500 1.93611100 0.17385100  
H 7.87079900 1.69338600 0.99446600  
C 10.17963500 1.05004900 -2.04235300  
H 8.45937700 0.12125000 -2.94558600  
C 10.68267600 1.70438600 -0.92180800  
H 10.23736500 2.44958400 1.04946600  
H 10.82018400 0.86857400 -2.90006500  
H 11.71634100 2.03515500 -0.90181200  
O 4.79044300 -2.01616200 1.17158800  
F 5.12257100 0.85069800 1.69914500  
H 4.53969600 0.54434800 2.39717800  
F 2.77096500 -2.14553000 2.57557300  
H 3.48860500 -2.06640000 1.90338700  
F 3.42376900 0.06440000 3.36788100  
H 3.08379700 -0.81328700 3.10724300

TS1-6

I -2.44932700 0.73016100 -0.25527100

C -4.07798400 -0.09918600 0.73853900  
C -6.18043100 -1.30394500 2.02778100  
C -5.21741200 -0.40876600 -0.00058200  
C -3.94402500 -0.39440900 2.09118500  
C -5.01971500 -1.00206200 2.73508500  
C -6.27985400 -1.00993400 0.66815900  
H -5.26864700 -1.07628600 -1.05780400  
H -3.01546700 -0.19059200 2.61217900  
H -4.94031500 -1.24818700 3.78850500  
H -7.18312200 -1.25694500 0.11978100  
H -7.01150400 -1.78155800 2.53661500  
O -1.21666800 -1.10458800 1.06297500  
C 0.07212800 -1.08773500 0.68594800  
C 2.72957500 -0.96840400 -0.09102200  
C 0.64534800 -2.14317000 -0.04318900  
C 0.85786700 0.03074400 1.00699800  
C 2.18845400 0.09677100 0.61178000  
C 1.97991500 -2.08721300 -0.42196100  
H 0.03916400 -3.01063100 -0.28315600  
H 0.42024900 0.82477600 1.60353500  
H 2.81403600 0.94581300 0.85974600  
H 2.44277900 -2.90240800 -0.96846900  
O -2.56623400 -1.58408200 -1.36944100  
C -2.78254300 -2.70533900 -0.85992000  
O -2.41588600 -3.03681100 0.32110300  
C -3.50014700 -3.78904700 -1.66593700  
O -3.16776300 2.62026100 -0.13436700  
C -4.21472300 2.94098100 -0.92737700  
O -4.75852800 2.14660500 -1.65376100  
C -4.61209300 4.40618800 -0.76182100  
H -1.77480600 -2.09691600 0.76623700  
C -5.77747800 4.70207200 -1.70482700  
H -6.07742400 5.74909000 -1.59589500  
H -5.49492400 4.52521200 -2.74597100  
H -6.63681000 4.06564000 -1.47832700  
H -5.03143000 4.62968300 0.69942600  
C -5.87264300 3.98333100 0.97085600  
H -4.20250400 4.42828000 1.38242200  
H -5.34661000 5.66997400 0.82944800  
C -3.40473000 5.29226600 -1.10123000  
H -3.07042000 5.12650000 -2.13065400  
C -3.69035900 6.34459200 -1.00397800  
H -2.56824800 5.09545000 -0.42628100  
C -2.46530000 -4.88308500 -1.97066100  
H -2.05486900 -5.29273800 -1.04352900  
H -2.93625900 -5.69527100 -2.53491700  
H -1.64128600 -4.48414600 -2.57269400  
C -4.06039200 -3.20896000 -2.96219200  
H -4.78469200 -2.41515000 -2.75371900  
H -3.26581300 -2.77896100 -3.57670900  
H -4.56412700 -3.99529000 -3.53459400  
C -4.62753500 -4.37121300 -0.80391600  
H -5.14172700 -5.16729300 -1.35352000  
H -4.22938700 -4.78095100 0.12696800  
H -5.36351000 -3.59982100 -0.55052300  
O 4.07962800 -0.90669600 -0.47160700  
C 4.98482500 -1.17141700 0.46353800  
C 6.39992800 -0.92026100 0.03343500  
H 6.86523500 -1.89253200 -0.17084200  
H 6.90070200 -0.51023100 0.91380200  
C 6.54543500 0.02635300 -1.16405100  
H 6.25149600 -0.48621000 -2.08508500  
H 5.85977800 0.86565600 -1.02311200  
C 7.96115200 0.53879700 -1.26374600  
C 8.38666200 1.53970500 -0.38434800  
H 8.87037300 0.01739000 -2.18320200  
F 9.69441100 2.01021500 -0.42704300  
H 7.67358100 1.94428200 0.33138600  
C 10.18190300 0.48693500 -2.22885200  
H 8.54746300 -0.75966600 -2.87266700  
C 10.59647200 1.48393900 -1.35100700  
H 10.01083300 2.79099800 0.25785500  
H 10.87847100 0.07437900 -2.95236300  
H 11.61700600 1.85211100 -1.38694000  
O 4.70769600 -1.61214200 1.57180600  
F 5.14310300 1.32032300 1.15919100  
C 4.57871500 1.51721600 1.90840500  
F 2.58505500 -2.08497100 2.68021100  
C 3.41334500 -1.92392900 2.14409200  
F 3.46038800 1.83736500 2.92440000  
F 2.94458700 1.07699100 3.26434500  
F 2.11545200 0.00170900 3.75078200  
H 2.26646600 -0.86910800 3.30005500

TS1-7

I -2.60220900 0.60874200 -0.35858600  
C -4.19435400 -0.27876000 0.64373700  
C -6.23507200 -1.55696700 1.96133300  
C -5.25149700 -0.78650400 -0.10801300  
C -4.10995600 -0.44116120 2.02571600  
C -5.15384000 -1.05876900 2.68332900  
C -6.28468800 -1.42254600 0.57407200  
H -5.26375600 -0.67627700 -1.18599600  
H -3.23932300 -0.05378900 2.56352100  
H -5.11105200 -1.18096600 3.76027400  
H -7.12486500 -1.82223200 0.01552400  
H -7.04157100 -2.06354900 2.48156300  
O -1.26207400 -0.93751000 1.19585200  
C 0.03496700 -0.82709200 0.85929300  
C 2.69485800 -0.50696400 0.14620700  
C 0.74465000 -1.89279700 0.28197500

C 0.68393700 0.39958500 1.06491900  
C 2.01653200 0.56407600 0.70312100  
C 2.07784800 -1.73210300 -0.06795400  
H 0.24457300 -2.84412100 0.13245300  
H 0.14083100 1.12307100 1.53360500  
H 2.53520800 1.49982800 0.86626000  
H 2.64316700 -2.55194900 -0.49944000  
O -2.43401600 -1.81315700 -1.21574700  
C -2.55928900 -2.89158300 -0.59411200  
O -2.22157300 -3.05575000 0.62880400  
C -3.11941700 -4.12494900 -1.30537000  
O -3.51355500 2.41322100 -0.49149200  
C -4.54003700 2.53132900 -1.36300600  
O -4.96067700 1.60809700 -2.01510400  
H -5.08900100 3.95621900 -1.38882700  
H -1.69732500 -1.99945600 0.99424700  
C -6.22296600 4.02069700 -2.41102000  
H -6.63113700 5.03594500 -2.43878200  
H -5.86609900 3.75912600 -3.41068600  
H -7.02613300 3.32675700 -2.14996700  
C -5.60989700 4.29763500 0.01583100  
H -6.39743000 3.60175600 0.32344700  
H -4.80499800 4.26148900 0.75404400  
H -6.03265600 5.30744200 0.00865700  
C -3.95770500 4.91976600 -1.77593800  
H -3.55171700 4.67544300 -2.76310200  
H -4.35059300 5.94081200 -1.51320000  
H -3.14505900 4.88790200 -1.04617300  
C -1.96376100 -5.12772900 -1.44428000  
H -1.56344800 -5.39068400 -0.66119600  
H -2.31844500 -6.04084800 -1.93451000  
H -1.15393700 -4.70831900 -2.05166800  
C -3.66692200 -3.74841800 -2.67978600  
H -4.47899700 -3.01987100 -2.59029200  
H -2.88934900 -3.30201900 -3.30428700  
H -4.05615600 -4.64028400 -3.18266500  
C -4.22521300 -4.73083500 -0.43187900  
H -4.62416200 -5.63240000 -0.90970000  
H -3.83709600 -4.99262400 -0.55992500  
H -5.04960300 -4.02139200 -2.29769300  
O 4.04173900 -0.33049000 -0.02622300  
C 4.96332600 -0.89405600 0.57134500  
C 6.36729000 -0.55180500 0.16733100  
H 7.01614700 -1.36112000 0.51166300  
H 6.61754500 0.33376100 0.76612600  
C 6.56842500 -0.25873000 -1.32414000  
H 6.27137800 -1.13387500 -1.91243300  
H 5.91133400 0.05636080 -1.62076500  
C 8.00923500 0.09168700 -1.60760300  
C 8.45685300 1.40767700 -1.47063800  
C 8.93010200 -0.89669900 -1.96020700  
C 9.79366800 1.73053600 -1.68423800  
H 7.74742500 2.18592800 -1.19839100  
C 10.26841000 -0.57863500 -2.17562300  
H 8.59242600 -1.92455000 -2.07163200  
C 10.70355400 0.73684600 -3.03782400  
H 10.12448200 2.75904400 -1.57811400  
H 10.97080400 -1.35819100 -2.45405600  
H 11.74589500 0.98716300 -2.20774000  
O 4.70745600 -1.60910900 1.52718500  
F 4.58757200 1.01669100 2.24629300  
H 4.32827400 1.92545700 2.12147800  
F 2.74752600 -1.29736900 2.98570000  
H 3.50288400 -1.42859100 2.35175000  
F 3.65087400 3.31545500 1.79840600  
H 2.75892800 3.22607100 2.18337700  
F 2.40391100 0.88084400 3.88239000  
H 2.59453200 0.01413900 3.42618300  
F 1.49798800 2.74973200 2.74685400  
H 1.79670500 1.91744000 3.21105900

TS1-8

I 2.62021800 -0.40637900 -0.65879900  
C 3.88668400 0.37719200 0.79092300  
C 5.51575900 1.48825300 2.69501200  
C 4.98964500 1.11357100 0.36732200  
C 3.55513900 0.19274900 2.12943600  
C 4.39615700 0.75771100 3.08574100  
C 5.81134900 1.66772400 1.34455200  
H 5.19552600 1.24065400 -0.68946200  
H 2.65655000 -0.34613600 2.40949000  
H 4.16375300 0.63398300 4.13811300  
H 6.67994900 2.24574200 1.04637200  
H 6.15962700 1.92977500 3.44893200  
O 0.98646500 0.90128600 0.82724000  
C -0.30402700 0.82156500 0.47044100  
C -3.00015600 0.57723700 -0.12041800  
C -1.11293800 1.96648300 0.37080400  
C -0.86583400 -0.43740300 0.20813000  
C -2.21470500 -0.56081200 -0.09340000  
C -2.46664700 1.84125800 -0.98902500  
H -0.67213700 2.94107900 0.55380200  
H -0.25202500 -1.32484800 0.29417300  
H -2.66224400 -1.53170700 -0.26119700  
H -3.11176300 2.71350600 0.05376200  
O 2.39884200 2.08591700 -0.85926000  
C 2.34088000 3.10439100 -0.56528900  
O 1.87330800 3.11350300 0.62555800  
C 2.86498500 4.44476400 -1.08714400  
O 3.65863500 -2.13725800 -0.81542100  
C 4.87256800 -2.07872500 -1.40744000

|       |              |             |             |        |              |             |             |        |              |              |             |
|-------|--------------|-------------|-------------|--------|--------------|-------------|-------------|--------|--------------|--------------|-------------|
| O     | 5.36287800   | -1.05125400 | -1.80530600 | C      | 4.83568200   | -4.36277200 | -1.56322700 | H      | 5.81941000   | -4.40717100  | -0.24837300 |
| C     | 5.52494800   | -3.45771100 | -1.47718400 | H      | 4.59376700   | -4.18148900 | -2.61574300 | H      | 6.73005800   | -2.914447800 | -0.56843000 |
| H     | 1.38932600   | 1.98842400  | 0.81985600  | H      | 5.34284300   | -5.33062500 | -1.49498400 | H      | 7.25923700   | -4.01682700  | 0.71831100  |
| C     | 6.87073000   | -3.32211000 | -2.18798300 | C      | 3.90277100   | -4.41403000 | -0.99647100 | C      | 5.03793000   | -3.82249600  | 2.32569400  |
| H     | 7.35482100   | -4.30231000 | -2.24207300 | C      | 1.57347600   | 5.54493400  | -1.05282500 | H      | 5.90460000   | -4.22530000  | 2.86026600  |
| H     | 6.74143600   | -2.93893900 | -3.20370300 | H      | 1.20089600   | 5.64376700  | -0.03031400 | H      | 4.39269800   | -3.32079700  | 3.05459000  |
| H     | 7.52974600   | -2.63422500 | -1.65201000 | H      | 1.88387200   | 6.53186400  | -1.41249900 | H      | 4.47854300   | -4.65127200  | 1.88689500  |
| C     | 5.72273700   | -3.96817000 | -0.04140700 | C      | 0.75366900   | 5.19392500  | -1.68904500 | O      | -3.48586500  | -1.49342400  | -1.24229900 |
| H     | 6.35440400   | -3.28477900 | 0.53572600  | C      | 3.28109900   | 4.43674600  | -2.53355300 | C      | -4.04532800  | -0.26786800  | -1.44389400 |
| H     | 4.76478700   | -4.07601900 | 0.47326100  | H      | 4.11688700   | 3.73296000  | -2.58047300 | C      | -5.51123800  | -0.30966000  | -1.09754600 |
| H     | 6.21621200   | -4.94499700 | -0.07001200 | H      | 2.49886300   | 4.06602600  | -3.20145400 | H      | -5.97742000  | -1.13493800  | -1.64731500 |
| C     | 4.59979800   | -4.41023400 | -2.24830900 | H      | 3.62242500   | 5.41080600  | -2.90008900 | H      | -5.95974900  | 0.62885400   | -1.43060900 |
| H     | 4.42211800   | -4.04882600 | -3.26659400 | C      | 3.87735400   | 5.07746300  | -0.17561900 | C      | -5.74118700  | -0.51413500  | 0.41237400  |
| H     | 5.07182500   | -5.39564000 | -2.31680600 | H      | 4.21629000   | 6.06581100  | -0.50476000 | H      | -5.23665600  | -1.43442100  | 0.72266500  |
| H     | 3.63692800   | -4.51983100 | -1.74348300 | H      | 3.51966400   | 5.14920700  | 0.85464600  | H      | -5.26784200  | 0.30567900   | 0.95826700  |
| C     | 1.73457100   | 5.47636500  | -0.97683700 | H      | 4.73756300   | 4.39886200  | -0.19512200 | C      | -7.21556700  | -0.58364000  | -0.72198100 |
| H     | 1.39527100   | 5.56533800  | 0.05805300  | O      | -4.29310400  | 0.34358300  | -0.60435000 | C      | -7.92789000  | 0.56812900   | 1.06311300  |
| H     | 2.08835000   | 6.45517300  | -1.31865400 | C      | -5.05011400  | -0.20474400 | 0.33750300  | C      | -7.90832300  | -1.79338800  | 0.62712400  |
| H     | 0.87995900   | 5.18841700  | -1.59900300 | C      | -6.46590200  | -0.42500700 | -0.09472100 | C      | -9.29774100  | 0.51475200   | 1.30649900  |
| C     | 3.33356600   | 4.31322400  | -2.53403500 | H      | -6.83364300  | -1.31704600 | 0.41623300  | H      | -7.39843600  | 1.51474400   | 1.12446600  |
| H     | 4.12844600   | 3.56732900  | -2.62207400 | H      | -6.48902600  | -0.59955700 | -1.17165800 | C      | -9.27750100  | -1.85284500  | 0.86966100  |
| H     | 2.51315100   | 3.99943800  | -3.18525000 | C      | -7.32053300  | 0.80225200  | 0.28120100  | H      | -7.36357600  | -2.69770300  | 0.36488800  |
| H     | 3.71519600   | 5.27621700  | -2.89045600 | H      | -7.24706800  | 0.96771700  | 1.36153600  | C      | -9.97681500  | -0.69719000  | 2.10425000  |
| C     | 4.03316300   | 4.86386700  | -0.18232900 | H      | -6.91292900  | 1.68952300  | -0.21645700 | H      | -9.83451700  | 1.41961600   | 1.57502500  |
| H     | 4.41581900   | 5.84093000  | -0.49740700 | C      | -8.76062400  | 0.59858500  | -0.11978800 | H      | -9.79864000  | -2.80261000  | 0.79657100  |
| H     | 3.71000300   | 4.92731800  | 0.85988000  | C      | -9.20394100  | 0.96898400  | -1.39090500 | H      | -11.04419400 | -0.74186000  | -1.40277500 |
| H     | 4.85446100   | 4.14092100  | -0.24488600 | C      | -9.66142000  | -0.01102100 | 0.75588400  | C      | -3.44044700  | 0.68922100   | -1.84829400 |
| O     | -4.37977400  | 0.41437700  | -0.33672200 | C      | -10.52080500 | 0.73929700  | -1.77904300 | F      | -2.90259500  | 0.24163700   | 0.96352500  |
| C     | -5.17341200  | 0.48695600  | 0.72810400  | H      | -8.50991300  | 1.44475000  | -2.08000300 | H      | -2.07297400  | 0.45372500   | 0.52440000  |
| C     | -6.60623900  | 0.15616200  | 0.42349200  | C      | -10.97910500 | -0.24266400 | 0.37191200  |        |              |              |             |
| H     | -7.22588800  | 0.67382800  | 1.16022100  | H      | -9.32556500  | -0.30270700 | 1.74829500  | TS1-11 |              |              |             |
| H     | -6.70506700  | -0.91814700 | 0.63120600  | C      | -11.41212300 | 0.13252300  | -0.89751000 | I      | 2.23248400   | 0.37703500   | -0.35165200 |
| C     | -7.05746300  | 0.45825500  | -1.01060400 | H      | -10.85171800 | 1.03699400  | -2.76917200 | C      | 3.86721400   | 1.70843000   | -0.30966600 |
| H     | -6.91559700  | 1.52419800  | -1.22003500 | H      | -11.66881900 | -0.71358400 | 1.06548600  | C      | 5.91714700   | 3.55397300   | -0.27111600 |
| H     | -6.42322000  | -0.09174400 | -1.71132500 | H      | -12.43991700 | -0.04510200 | -1.19765400 | C      | 4.65965900   | 1.81048000   | 0.82976400  |
| C     | -8.50609400  | 0.07952000  | -1.20327400 | O      | -4.67141700  | -0.42175600 | 1.48328600  | C      | 4.07971600   | 2.50259500   | -1.43073400 |
| C     | -8.85366000  | -1.20909600 | -1.61426800 | F      | -2.64136000  | -3.62136100 | -1.64248100 | C      | 5.11552900   | 3.43516100   | -1.40233800 |
| C     | -9.52499200  | 0.99291700  | -0.92510200 | H      | -2.04900600  | -3.69035300 | -0.88347200 | C      | 5.68992600   | 2.74481000   | 0.84165700  |
| C     | -10.18945700 | -1.57720300 | -1.74784000 | F      | -2.57878600  | -0.00547700 | 2.62801900  | H      | 4.48709300   | 1.16106600   | 1.67997600  |
| H     | -8.06807100  | -1.92774200 | -1.83630100 | H      | -3.41819600  | -0.16327700 | 2.07447800  | H      | 3.45166600   | 2.40340500   | -2.31010700 |
| C     | -10.86229400 | 0.62972300  | -1.05768100 | F      | -1.22282000  | -3.61124600 | 0.37286400  | H      | 5.29414400   | 4.06328000   | -2.26881500 |
| H     | -9.26580000  | 2.00020400  | -0.60686300 | H      | -0.25966000  | -3.50744800 | 0.28516800  | H      | 6.31817000   | 2.83671700   | 1.72172400  |
| C     | -11.19771200 | -0.65763200 | -1.46964900 | F      | -1.12342400  | -1.85136900 | 2.67407900  | H      | 6.72526800   | 4.27806200   | -0.25572600 |
| H     | -10.44288600 | -2.58146500 | -2.07296800 | H      | -1.73563900  | -1.04287800 | 2.61134700  | O      | 2.08169900   | -1.87782500  | -1.03526200 |
| H     | -11.64248600 | 1.35321000  | -0.84236800 | F      | 1.17764500   | -3.16524900 | 0.28669000  | C      | 0.75220500   | -2.01448200  | -0.87730300 |
| H     | -12.23972700 | -0.94198300 | -1.57615000 | H      | 1.26678100   | -2.59614200 | 1.09840800  | C      | -2.00573200  | -2.05778500  | -0.49313200 |
| O     | -4.79343500  | 0.77656900  | 1.85136100  | F      | 1.16573700   | -1.73528800 | 2.19631500  | C      | 0.20824000   | -2.56518200  | 0.29605100  |
| F     | -3.92796700  | -1.76114500 | 1.85970200  | O      | 0.17772700   | -1.68608300 | 2.43465300  | C      | -0.11494100  | -1.47532100  | -1.84308600 |
| H     | -3.25758800  | -2.40184400 | 1.65300600  | F      | -4.69805400  | -2.52009800 | -0.65854500 | C      | -1.49144300  | -1.48622600  | -1.65303200 |
| F     | -2.57204600  | 0.44825300  | 2.83697300  | H      | -3.99763400  | -2.98396000 | -1.10565000 | C      | -1.16538100  | -2.60309200  | 0.47564800  |
| H     | -3.45204100  | 0.54868200  | 2.36746700  |        |              |             |             | H      | 0.87996400   | -2.96353900  | 1.05146300  |
| F     | -2.28902200  | -3.48634600 | 0.88444600  | TS1-10 |              |             |             | H      | 0.31690500   | -1.05482300  | -2.74627700 |
| H     | -1.33789100  | -3.44286500 | 1.00087100  | I      | 2.15420800   | 0.35739800  | -0.44994200 | H      | -2.16419300  | -1.04962000  | -2.38071400 |
| F     | -1.51863700  | -1.65328000 | 2.81671800  | C      | 3.84169400   | 1.59247700  | -0.20704300 | H      | -1.60719000  | -3.02857300  | 1.37011900  |
| H     | -2.04602900  | -0.78681400 | 2.78120600  | C      | 5.96957000   | 3.32348200  | 0.09176600  | O      | 4.42781300   | -0.92661700  | 0.09975200  |
| F     | 0.23224600   | -3.44495100 | 0.97406500  | C      | 4.55329900   | 1.58509600  | 0.98921000  | C      | 4.63546100   | -2.10303000  | 0.43272200  |
| H     | 0.58725800   | -2.79245200 | 1.60571400  | C      | 4.17413800   | 2.44049500  | -1.25768400 | C      | 3.78465400   | -3.06300200  | 0.25263800  |
| F     | 0.83024300   | -1.66892300 | 2.51651600  | C      | 5.24839400   | 3.31437000  | -1.09819900 | C      | 5.96917300   | -2.51734100  | 1.04396500  |
| H     | -0.12703800  | -1.49521800 | 2.72052600  | C      | 5.62327200   | 2.46200000  | 1.13218600  | O      | 1.20594000   | 2.25371800   | -0.03777500 |
|       |              |             |             | H      | 4.28870600   | 0.89507700  | 1.78148700  | C      | -0.04071000  | 2.08773800   | 0.27067100  |
| TS1-9 |              |             |             | H      | 3.60818100   | 2.42699100  | -2.18350000 | O      | -0.50487800  | 0.94933600   | 0.44712100  |
| I     | 2.73317800   | -0.26525400 | -0.55752500 | H      | 5.51943300   | 3.98322500  | -1.90837100 | C      | -0.89817600  | 3.34671800   | 0.36877900  |
| C     | 3.92280900   | 0.63421300  | 0.88879100  | H      | 6.18960200   | 2.46789700  | 2.05787800  | H      | 2.96546300   | -2.65682400  | -0.29612200 |
| C     | 5.45915600   | 1.88060100  | 2.78687900  | H      | 6.80784200   | 4.00248600  | 0.20988400  | C      | -1.60449900  | 3.34236100   | 1.73315100  |
| C     | 5.01524700   | 1.38588100  | 0.46445400  | O      | 2.00405400   | -1.87843200 | -1.33336000 | H      | -2.23146700  | 4.23607300   | 1.81086900  |
| C     | 3.56072700   | 0.49463600  | 2.22459700  | C      | 0.66181100   | -1.91258500 | -1.35945900 | H      | -2.24320200  | 2.46489300   | 1.84681400  |
| C     | 4.35357900   | 1.12925400  | 3.17825300  | C      | -2.10708500  | -1.61718100 | -1.32190400 | H      | -0.87929300  | 3.36478600   | 2.55322500  |
| C     | 5.78957700   | 2.00952900  | 1.43863700  | C      | -0.08347300  | -2.32953100 | -0.24173300 | C      | -0.04898400  | 4.60812200   | 2.21283200  |
| H     | 5.25052200   | 1.47098600  | -0.59061400 | C      | -0.01650700  | -1.37389300 | -2.46574100 | H      | 0.70937000   | 4.67653200   | 0.99792100  |
| H     | 2.67752400   | -0.07111700 | 2.49884400  | C      | -1.39754600  | -1.23166200 | -2.45398700 | H      | 0.46186800   | 4.62749700   | -0.75330200 |
| H     | 4.09610900   | 1.04180100  | 4.22846400  | C      | -1.46284700  | -2.18448000 | -0.22621100 | H      | -0.69770600  | 5.48699400   | 0.28058000  |
| H     | 6.64896100   | 2.60089400  | 1.13983800  | H      | 0.44198300   | -2.74142400 | 0.61582000  | C      | -1.93790700  | 3.26062900   | -0.76337900 |
| H     | 6.06580400   | 2.37608900  | 3.53811900  | H      | 0.57007300   | -1.06167100 | -3.32420000 | H      | -2.55587100  | 2.36634500   | -0.68823400 |
| O     | 0.98590300   | 1.00049300  | 0.85116100  | H      | -1.91997300  | -0.79695000 | -3.29715900 | H      | -2.59488700  | 4.13453200   | -0.70934900 |
| C     | -0.27910500  | 0.86871100  | 0.44196500  | H      | -2.05420800  | -2.46044500 | 0.63989900  | H      | -1.45052600  | 3.26400600   | -1.74409600 |
| C     | -2.93653100  | 0.53046600  | -0.29141400 | O      | 4.25385900   | -1.11274400 | 0.14167400  | C      | 6.71537400   | -1.28464700  | 1.52939900  |
| C     | -1.14252100  | 1.97631200  | 0.35551900  | C      | 4.31165700   | -2.30504300 | 0.47377600  | H      | 6.16082600   | -0.79796700  | 2.36262200  |
| C     | -0.77645200  | -0.40289600 | 0.10559600  | O      | 3.40919800   | -3.18287700 | 0.16772900  | H      | 7.69418800   | -1.58196100  | 1.94267500  |
| C     | -2.10195800  | -0.57418700 | -0.26465900 | C      | 5.51264000   | -2.84690500 | 1.24289100  | H      | 6.85942100   | -0.55256400  | 0.75422900  |
| C     | -2.47455600  | 1.80391900  | 0.00434200  | O      | 1.18467000   | 2.19615600  | 0.00660000  | C      | 6.76792800   | -3.19543600  | -0.08313200 |
| H     | -0.75815600  | 2.96176400  | 0.59827200  | C      | -0.09734000  | 2.00826400  | 0.19200700  | H      | 6.23132100   | -4.06        |             |

|   |              |             |             |
|---|--------------|-------------|-------------|
| H | -8.19611700  | -2.00342100 | 1.87950300  |
| C | -9.45241900  | 0.99407400  | 0.88905400  |
| H | -8.36244900  | 2.47180500  | -0.23734200 |
| H | -10.27116200 | -0.65637100 | 2.00069600  |
| H | -10.36053300 | 1.58653900  | 0.94288300  |
| O | -3.98003900  | -2.83051400 | -2.21887400 |
| F | -3.99096200  | 0.44317700  | -1.27811600 |
| H | -3.57702800  | 0.37153200  | -0.41736500 |
| F | -2.84485000  | 0.49357700  | 0.94134100  |
| H | -1.87510200  | 0.65556800  | 0.75124700  |

TS1-12

|   |             |             |             |
|---|-------------|-------------|-------------|
| I | -2.37588100 | 0.32572400  | 0.28796000  |
| C | -3.97842400 | 1.69131400  | 0.43962300  |
| C | -5.97870200 | 3.57963800  | 0.64974400  |
| C | -4.90910700 | 1.80316000  | -0.58846300 |
| C | -4.02821800 | 2.49652300  | 1.57134200  |
| C | -5.04004000 | 3.45064400  | 1.66887200  |
| C | -5.91350100 | 2.75894700  | -0.47580500 |
| H | -4.85964600 | 1.14741700  | -1.45019200 |
| H | -3.29389600 | 2.38998300  | 2.36327600  |
| H | -5.09228800 | 4.08766200  | 2.54563000  |
| H | -6.64812800 | 2.85879800  | -1.26833000 |
| H | -6.76714600 | 4.32066800  | 0.73219900  |
| O | -2.14528000 | -1.91421000 | 0.92904500  |
| C | -0.81709200 | -2.03426100 | 0.72905500  |
| C | 1.93306800  | -2.01159100 | 0.27412300  |
| C | -0.29738800 | -2.31338100 | -0.54318300 |
| C | 0.07119900  | -1.74875900 | 1.77922200  |
| C | 1.43648700  | -1.74855200 | 1.55330400  |
| C | 1.07226400  | -2.31197800 | -0.78335300 |
| O | -0.98942700 | -2.52782100 | -1.35390400 |
| H | -0.33647400 | -1.53425500 | 2.76199800  |
| H | 2.15086600  | -1.53520500 | 2.34097800  |
| H | 1.46304500  | -2.21990000 | -1.76744400 |
| O | -4.59170900 | -0.92738500 | 0.22318500  |
| C | -4.84402400 | -2.07596900 | -0.17847300 |
| O | -3.96320900 | -3.02023400 | -0.25282900 |
| C | -6.26634000 | -2.46657600 | -0.56138700 |
| O | -1.40356200 | 2.21006100  | -0.23415800 |
| C | -0.17236200 | 2.06308500  | -0.58234500 |
| O | 0.34249200  | 0.92812100  | -0.63090000 |
| C | 0.61544500  | 3.33119900  | -0.90005700 |
| H | -3.07524100 | -2.65484600 | 0.21032300  |
| C | 1.31266700  | 3.14214600  | -2.25585400 |
| H | 1.87709900  | 4.04908900  | -2.49366200 |
| H | 2.01070300  | 2.30319000  | -2.23327500 |
| H | 0.58431300  | 2.97661800  | -3.05635300 |
| C | -0.30321300 | 4.55238800  | -0.93896200 |
| H | -1.06830100 | 4.44949300  | -1.71382400 |
| H | -0.80958600 | 4.70093400  | 0.01817200  |
| H | 0.29394100  | 5.44285100  | -1.15857900 |
| C | 1.66626400  | 3.48946700  | 0.21345700  |
| H | 2.32569500  | 2.62188200  | 0.27486900  |
| H | 2.27736100  | 4.37281500  | 0.00314100  |
| H | 1.18786900  | 3.693036200 | 1.18814200  |
| C | -7.08150600 | -1.21574400 | -0.88911000 |
| H | -6.67903700 | -0.70593800 | -1.77134500 |
| H | -8.11677000 | -1.49839300 | -1.10484900 |
| H | -7.07314900 | -0.50865500 | -0.05592800 |
| C | -6.85629700 | -3.17728100 | 0.67019500  |
| H | -6.26721600 | -4.06217600 | 0.92702500  |
| H | -6.87848200 | -2.50668800 | 1.53497300  |
| H | -7.88167400 | -3.49264900 | 0.45169600  |
| C | -6.24299800 | -3.42837500 | -1.75416900 |
| H | -7.26807000 | -3.71892700 | -2.00599100 |
| H | -5.79748300 | -2.95554200 | -2.63553500 |
| H | -5.66958600 | -4.32818200 | -1.52242600 |
| O | 3.30576600  | -1.90423100 | 0.20427900  |
| C | 4.06540400  | -2.20308300 | -0.88378600 |
| C | 5.50502100  | -1.87925400 | -0.57899300 |
| H | 6.13005000  | -2.40043300 | -1.30701100 |
| H | 5.73615500  | -2.22700400 | 0.43153700  |
| C | 5.76174900  | -0.36078900 | -0.64573200 |
| H | 5.51470600  | 0.00812000  | -1.64701000 |
| H | 5.09604800  | 0.14332000  | 0.05825500  |
| C | 7.19539800  | -0.04306600 | -0.29997800 |
| C | 7.60764300  | -0.07188800 | 1.03619000  |
| C | 8.13293600  | 0.24512800  | -1.29170000 |
| C | 8.93288800  | 0.18919600  | 1.36896400  |
| H | 6.87618900  | -0.30582600 | 1.80660600  |
| C | 9.46072500  | 0.50650000  | -0.95965000 |
| H | 7.81867400  | 0.26828900  | -2.33252700 |
| C | 9.86334500  | 0.47998300  | 0.37231300  |
| H | 9.24077000  | 0.16766600  | 2.41004500  |
| H | 10.17904700 | 0.73273800  | -1.74193500 |
| H | 10.89693400 | 0.68526500  | 0.63360100  |
| O | 3.63865300  | -2.64508500 | -1.91687800 |
| F | 4.81232100  | -1.13976000 | 2.40750300  |
| H | 4.24087100  | -0.51466600 | 1.98150400  |
| F | 3.28927700  | 0.66845500  | 1.37518400  |
| H | 3.07290700  | 0.50341100  | 0.43996500  |
| F | 2.67284300  | 0.49928800  | -0.97500400 |
| H | 1.66511300  | 0.67381200  | -0.89121500 |

TS1-13

|   |             |            |             |
|---|-------------|------------|-------------|
| I | -2.41051900 | 0.33836900 | 0.15287200  |
| C | -4.05290300 | 1.66620100 | 0.17501300  |
| C | -6.11205200 | 3.50100300 | 0.21235900  |
| C | -4.88999900 | 1.76065000 | -0.93187300 |
| C | -4.22418200 | 2.46194700 | 1.30105900  |

|   |             |             |             |
|---|-------------|-------------|-------------|
| C | -5.26564000 | 3.38912100  | 1.31105300  |
| C | -5.92461100 | 2.68988700  | -0.90640500 |
| H | -4.74672900 | 1.11145100  | -1.78823300 |
| H | -3.56155800 | 2.36856900  | 2.15541800  |
| H | -5.41320200 | 0.81853800  | 2.18246300  |
| H | -6.58763500 | 2.77604000  | -1.76121800 |
| H | -6.92378300 | 4.22101800  | 0.22703900  |
| O | -2.19263300 | -1.91336400 | 0.76262700  |
| C | -0.87553600 | -2.05591400 | 0.51123900  |
| C | 1.85279200  | -2.11075500 | -0.04111100 |
| C | -0.41911300 | -2.42232500 | -0.76536300 |
| C | 0.06119100  | -1.71295900 | 1.49872000  |
| C | 1.42293900  | -1.74027400 | 1.23232100  |
| C | 0.94058700  | -2.46098300 | -1.03370300 |
| H | -1.14581400 | -2.67579800 | -1.53279700 |
| H | -0.30433600 | -1.42409900 | 2.47926900  |
| H | 2.14010300  | -1.47631100 | 1.99654200  |
| H | 1.31581200  | -2.73818900 | -2.01292100 |
| O | -4.63111200 | -0.94478300 | -0.02589800 |
| C | -4.87547200 | -2.10171100 | -0.40351800 |
| C | -3.99942300 | -3.05462200 | -0.40934500 |
| O | -6.28070400 | -2.49550500 | -0.84274100 |
| O | -1.45710600 | 2.23885900  | -0.29999500 |
| C | -0.17391400 | 2.14804700  | -0.40473300 |
| O | 0.39494200  | 1.04338300  | -0.32773300 |
| C | 0.59219400  | 3.45659900  | -0.58104400 |
| H | -3.12586600 | -2.67037500 | 0.06785100  |
| C | 1.67235700  | 3.25848200  | -1.65305200 |
| H | 2.22167600  | 4.19618100  | -1.78194000 |
| H | 2.38559500  | 2.48417400  | -1.36498600 |
| H | 1.22878800  | 2.98949200  | -2.61706400 |
| C | -0.34976200 | 4.59516600  | -0.97399500 |
| H | -0.84500200 | 4.38896600  | -1.92751600 |
| H | -1.12272900 | 4.75144500  | -0.21777500 |
| O | 0.22873500  | 5.51827200  | -1.07912000 |
| C | 1.24894200  | 3.75470400  | 0.77948500  |
| H | 1.90430300  | 2.94012000  | 1.09289700  |
| H | 1.84552100  | 4.66846800  | 0.69520000  |
| C | 0.49150000  | 3.90964200  | 1.55478300  |
| C | -7.08935900 | -1.24555200 | -1.18825400 |
| H | -6.65370400 | -2.17155100 | -2.04591600 |
| H | -8.11348100 | -1.53093600 | -1.44915600 |
| H | -7.11833600 | -0.54833000 | -0.34725100 |
| C | -6.91443700 | -3.22529600 | 0.35509000  |
| H | -6.33074200 | -4.11018500 | 0.62344900  |
| H | -6.97408900 | -2.56644200 | 1.22719500  |
| H | -7.92909000 | -3.54246300 | 0.09319000  |
| C | -6.20339300 | -3.44300800 | -2.04510800 |
| H | -7.21517600 | -3.74045200 | -2.33921700 |
| H | -5.72999200 | -2.95524100 | -2.90366300 |
| H | -5.63018600 | -4.33992200 | -1.80161700 |
| O | 3.17518500  | -2.06247400 | -0.43209700 |
| C | 4.17228800  | -2.41206500 | 0.42882700  |
| C | 5.52294100  | -2.07320000 | -0.14800300 |
| H | 5.88145900  | -2.93913900 | -0.71838600 |
| H | 6.18926400  | -1.95491300 | 0.70874800  |
| C | 5.52951600  | -0.81043000 | -1.02395700 |
| H | 5.11077000  | -1.04212500 | -2.00802100 |
| H | 4.87450400  | -0.06553900 | -0.56445300 |
| C | 6.92604400  | -0.25594300 | -1.15914800 |
| C | 7.50068400  | 0.42406900  | -0.07965100 |
| C | 7.67785800  | -0.42739500 | -2.32116100 |
| C | 8.79610900  | 0.92203500  | -0.16402400 |
| H | 6.91277600  | 0.55556500  | 0.82635100  |
| C | 8.97682000  | 0.07056800  | -2.40952900 |
| H | 7.23991300  | -0.95330100 | -3.16628600 |
| C | 9.53903900  | 0.74664000  | -1.33116700 |
| H | 9.22785700  | 1.45094300  | 0.68042500  |
| H | 9.54828600  | -0.06933900 | -3.32229200 |
| H | 10.55008200 | 1.13637300  | -1.39835800 |
| C | 3.97936300  | -2.93713500 | 1.49225800  |
| O | 4.66302000  | -0.17081200 | 1.81860000  |
| H | 4.40591700  | -0.68245300 | 2.57890000  |
| F | 3.34492400  | -0.80273700 | 3.83848500  |
| C | 2.87532400  | -0.04112000 | 3.47782700  |
| F | 2.29476900  | 1.00831500  | 2.54043900  |
| C | 2.65026100  | 0.86024900  | 1.63663900  |
| F | 2.74077600  | 0.80500100  | 0.17813600  |
| H | 1.76810400  | 0.88156600  | -0.10345000 |

TS1-14

|   |             |             |             |
|---|-------------|-------------|-------------|
| I | -2.37739900 | 0.25868800  | 0.17311100  |
| C | -4.09163700 | 1.50068800  | 0.23418200  |
| C | -6.32661400 | 3.11869200  | 0.26428400  |
| C | -4.58341600 | 1.99168500  | -0.97009700 |
| C | -4.69545700 | 1.78929400  | 1.45213400  |
| C | -5.82068700 | 2.60957400  | 1.45892000  |
| C | -5.70982400 | 2.81232500  | -0.94643300 |
| H | -4.09832700 | 1.74859600  | -1.91027800 |
| H | -4.30905900 | 1.37241800  | 2.37595300  |
| H | -6.30436400 | 2.84573200  | 2.40111100  |
| H | -6.10309900 | 3.20910800  | -1.87682600 |
| H | -7.20598000 | 3.75429500  | 0.27716600  |
| O | -2.13784500 | -2.03013600 | 0.21333000  |
| C | -0.83388600 | -2.09391200 | -0.11874700 |
| C | 1.86676100  | -1.96160600 | -0.78152200 |
| C | -0.43075200 | -2.11470100 | -1.46430600 |
| C | 0.14384200  | -2.00025300 | 0.88742600  |
| C | 1.48864200  | -1.93768200 | 0.56006400  |
| C | 0.91630500  | -2.06160200 | -1.79318100 |
| H | -1.19066900 | -2.17140400 | -2.23921700 |

|   |             |             |             |
|---|-------------|-------------|-------------|
| H | -0.16819900 | -1.97669200 | 1.92670200  |
| H | 2.24628700  | -1.86898800 | 1.32591700  |
| H | 1.24810600  | -2.07395900 | -2.82570800 |
| O | -4.61926500 | -1.04382000 | 0.43058400  |
| C | -5.01373500 | -1.87972100 | -0.38758500 |
| O | -4.21151000 | -2.70195200 | -1.00803500 |
| C | -6.47958500 | -1.98366100 | -0.77853000 |
| O | -1.49731900 | 2.26481200  | -0.02423300 |
| C | -0.21845200 | 2.22168600  | -0.15509800 |
| O | 0.37853300  | 1.12729200  | -0.22243800 |
| C | 0.52677700  | 3.55322600  | -0.18554100 |
| H | -3.27006600 | -2.55972100 | -0.60521000 |
| C | 1.55286400  | 3.51632500  | -1.32683300 |
| H | 2.09134200  | 4.46868200  | -1.35283200 |
| H | 2.28288100  | 2.71744700  | -1.18217600 |
| H | 1.06340400  | 3.37618100  | -2.29605900 |
| C | -0.44317300 | 4.71971800  | -0.37197700 |
| H | -0.98731800 | 4.63572800  | -1.31742800 |
| H | -1.17591300 | 4.76031600  | -0.43747300 |
| H | 0.12062300  | 5.65774000  | -0.38076600 |
| C | 1.25338400  | 3.67163900  | 1.16671300  |
| H | 1.93724800  | 2.85337400  | 1.32305400  |
| H | 1.83074800  | 4.60135700  | 1.18180900  |
| C | 0.53886200  | 3.69773100  | 1.99585300  |
| C | -6.94963800 | -3.43203900 | -0.59372800 |
| H | -6.87853200 | -3.73771000 | -0.45501900 |
| H | -7.99630300 | -3.51844500 | -0.90300400 |
| H | -6.34840600 | -4.11778    |             |

|   |             |             |             |
|---|-------------|-------------|-------------|
| H | 1.84813900  | 4.59676700  | -1.66899800 |
| H | 2.10807600  | 2.84913800  | -1.57925500 |
| H | 0.76768300  | 3.50274500  | -2.54901900 |
| C | -0.59614400 | 4.72557700  | -0.45215900 |
| H | -1.23165500 | 4.63852400  | -1.33811900 |
| H | -1.24261700 | 4.72171800  | 0.42873200  |
| H | -0.07018700 | 5.68429900  | -0.49608800 |
| C | 1.27535100  | 3.70796200  | 0.88820400  |
| H | 2.05243000  | 2.94198300  | 0.91530700  |
| H | 1.76140300  | 4.68809700  | 0.91005100  |
| H | 0.65286100  | 3.61026600  | 1.78370000  |
| C | -6.84871300 | -3.62036800 | -0.37451600 |
| H | -6.77638800 | -3.79672300 | 0.70344500  |
| H | -7.89098400 | -3.76961300 | -0.67444600 |
| H | -6.22695100 | -4.35727100 | -0.88855600 |
| C | -6.50774300 | -1.97855300 | -2.24990400 |
| H | -6.18385900 | -0.96708200 | -2.52118500 |
| H | -5.88966100 | -2.70183600 | -2.78766600 |
| H | -7.54785000 | -2.09799600 | -2.56996600 |
| C | -7.26968600 | -1.15845800 | 0.00092600  |
| H | -8.31746900 | -1.27656300 | -0.29347100 |
| H | -7.19556700 | -1.28156900 | 1.08495200  |
| H | -6.94798900 | -0.14052800 | -0.24307300 |
| O | 3.26834200  | -1.88430400 | -0.86034600 |
| C | 4.22955900  | -2.50471300 | -0.11062000 |
| C | 5.61397800  | -2.06756700 | -0.52055900 |
| H | 6.07286200  | -2.88636800 | -1.08780500 |
| H | 6.17451400  | -1.98385000 | 0.41384000  |
| C | 5.67705800  | -0.75096500 | -1.30635400 |
| H | 5.37325700  | -0.92192700 | -2.34406700 |
| H | 4.95678000  | -0.05150400 | -0.87457500 |
| C | 7.06313400  | -0.15738200 | -1.25115900 |
| C | 7.49170000  | 0.46723600  | -0.07464400 |
| C | 7.94581500  | -0.23818200 | -2.32768300 |
| C | 8.77265800  | 0.99945900  | 0.01982800  |
| H | 6.80073300  | 0.52750200  | 0.76378400  |
| C | 9.23079000  | 0.29460200  | -2.23701700 |
| H | 7.62224000  | -0.72046900 | -3.24710400 |
| C | 9.64730900  | 0.91474400  | -1.06312600 |
| H | 9.09028600  | 1.48432200  | 0.93816000  |
| H | 9.90553600  | 0.22547900  | -3.08510000 |
| H | 10.64728300 | 1.33124200  | -0.99109000 |
| O | 3.98051300  | -3.31085300 | 0.74184200  |
| F | 4.46581300  | -0.36532500 | 1.43072900  |
| H | 4.10381500  | -0.61602900 | 2.27837000  |
| F | 3.34426200  | -1.08959500 | 3.59039500  |
| H | 2.43149300  | -0.80680800 | 3.64274600  |
| F | 2.30665800  | 0.83397900  | 2.00661800  |
| H | 2.67862400  | 0.77923600  | 1.06763400  |

|   |             |             |             |
|---|-------------|-------------|-------------|
| F | 2.73124400  | 0.95047800  | -0.29606700 |
| H | 1.70823300  | 1.05856400  | -0.46442400 |
| F | 0.85565200  | -0.68844900 | 3.89532200  |
| H | 0.38811600  | -0.00685700 | 3.40345800  |
| F | -0.04736400 | 1.05071300  | 2.35996000  |
| H | 0.87242600  | 1.04313400  | 2.01894200  |

TS1-16

|   |             |             |             |
|---|-------------|-------------|-------------|
| I | -2.42584100 | 0.08986600  | -0.31534400 |
| C | -3.89842900 | 1.53224200  | 0.09763600  |
| C | -5.72388100 | 3.50082700  | 0.70490300  |
| C | -4.85430500 | 1.87605500  | -0.85434000 |
| C | -3.83855600 | 2.13402600  | 1.34963700  |
| C | -4.76660700 | 3.13229400  | 1.64516800  |
| C | -5.76938300 | 2.87551600  | -0.54189200 |
| H | -4.88454000 | 1.37534100  | -1.81699400 |
| H | -3.09477900 | 1.82597200  | 2.07776500  |
| H | -4.73790800 | 3.61658500  | 2.61558700  |
| H | -6.51907100 | 3.16553400  | -1.27105900 |
| H | -6.44302100 | 4.27792300  | 0.94306100  |
| O | -2.12251500 | -2.10951500 | 0.10804500  |
| C | -0.77918900 | -2.18907800 | -0.02541300 |
| C | 1.97881100  | -2.09170100 | -0.28918300 |
| C | -0.18578900 | -2.46484500 | -1.26565300 |
| C | 0.02472400  | -1.84153200 | 1.07037500  |
| C | 1.40227700  | -1.79254500 | 0.94512700  |
| C | 1.19727600  | -2.43312900 | -1.38947800 |
| H | -0.81681500 | -2.71191800 | -2.11503600 |
| H | -0.45262500 | -1.57790900 | 2.00585200  |
| H | 2.01757300  | -1.50356500 | 1.78556900  |
| H | 1.68651400  | -2.65013500 | -2.33269200 |
| O | -4.55921600 | -1.04040500 | 0.02531600  |
| C | -4.94624900 | -2.10980800 | -0.47892300 |
| C | -4.14741600 | -3.03399600 | -0.91051300 |
| O | -6.43051500 | -2.39618900 | -0.64602800 |
| O | -1.41758400 | 2.03319200  | -1.07598600 |
| C | -0.17329100 | 2.04463500  | -1.03248800 |
| O | 0.43912800  | 0.92157300  | -0.80376100 |
| C | 0.60526600  | 3.31355300  | -1.33492300 |
| H | -3.18101600 | -2.78950500 | -0.59907700 |
| C | 1.46247600  | 3.03158300  | -2.58376500 |
| H | 1.98936100  | 3.94984500  | -2.85967700 |
| H | 2.21018000  | 2.25789000  | -2.39246400 |
| H | 0.84199600  | 2.72733200  | -3.43308500 |
| C | -0.37608000 | 4.45439700  | -1.60180000 |
| H | -1.01900800 | 4.23632700  | -2.45882100 |
| H | -1.01446300 | 4.62811400  | -0.73160900 |
| H | 0.18832400  | 5.36772700  | -1.81192800 |
| C | 1.51706800  | 3.66832400  | -0.14747300 |

|   |             |             |             |
|---|-------------|-------------|-------------|
| H | 2.22188800  | 2.86718400  | 0.07963400  |
| H | 2.08998500  | 4.56080000  | -0.41747000 |
| H | 0.92709900  | 3.88219700  | 0.74576100  |
| C | -6.70272800 | -2.51606600 | -2.15520700 |
| H | -6.11331000 | -3.32284100 | -2.59780900 |
| H | -7.76448200 | -2.72953200 | -2.31364500 |
| H | -6.46389200 | -1.58140500 | -2.67457800 |
| C | -7.25530900 | -1.26141500 | -0.04130800 |
| H | -7.05921400 | -1.15900600 | 1.02936100  |
| H | -7.02085700 | -0.30363300 | -0.51476000 |
| H | -8.32003600 | -1.47142500 | -0.18283800 |
| C | -6.74706000 | -3.72937200 | 0.04731900  |
| H | -7.80925600 | -3.95962700 | -0.08217300 |
| H | -6.15679200 | -4.54341400 | -0.37959200 |
| H | -6.53931800 | -3.67407100 | 1.12055700  |
| O | 3.33766400  | -1.97355500 | -0.50035800 |
| C | 4.20429200  | -2.52113500 | 0.40538100  |
| C | 5.62698500  | -2.07638300 | 0.16225400  |
| H | 6.23838200  | -2.97669200 | 0.03800700  |
| H | 5.94437200  | -1.62036900 | 1.10567500  |
| C | 5.84195100  | -1.09310500 | -0.99290400 |
| H | 5.71467000  | -1.60897300 | -1.95039900 |
| H | 5.07331900  | -0.31755000 | -0.94995400 |
| C | 7.20962800  | -0.46114800 | -0.90941000 |
| C | 7.43949900  | 0.55515800  | 0.02358300  |
| C | 8.26736700  | -0.88623000 | -1.71271200 |
| C | 8.69733000  | 1.13480400  | 0.14728800  |
| H | 6.61531200  | 0.88468400  | 0.65342400  |
| C | 9.52968200  | -0.30789500 | -1.59240500 |
| H | 8.09936900  | -1.67545200 | -2.44169100 |
| C | 9.74752900  | 0.70421400  | -0.66252000 |
| H | 8.85944700  | 1.92525900  | 0.87383400  |
| H | 10.34241700 | -0.64822800 | -2.22699600 |
| H | 10.72968000 | 1.15690600  | -0.56858900 |
| O | 3.85885500  | -3.26114300 | 1.28310200  |
| F | 4.03808500  | 0.04248800  | 1.36135200  |
| H | 3.52885800  | 0.07189800  | 2.21747500  |
| F | 2.96136700  | -0.10634300 | 3.48642000  |
| H | 1.96956100  | -0.10668900 | 3.48843000  |
| F | 1.70123300  | 1.09881500  | 1.59380200  |
| H | 3.29681900  | 0.54766300  | 0.18751400  |
| F | 3.00072700  | 0.84593500  | -0.69721100 |
| H | 1.43179000  | 0.96552800  | -0.68947400 |
| F | -1.29530200 | 0.58235600  | 2.89691600  |
| H | -0.90164700 | 1.42494000  | 2.21817600  |
| F | -0.43337900 | 2.18947600  | 1.55223200  |
| H | 0.85383900  | 1.59462000  | 1.57697700  |
| F | 0.61521800  | -0.45142300 | 3.73066500  |
| H | -0.22073700 | 0.04147100  | 3.39358600  |

## 7. Hypervalent I(III)-Promoted Amide (or ester) Formation

### 7-1. General Procedures

**General Procedure E:** A reaction tube with magnetic stirring bar was charged with substrate (0.10 mmol) and  $\text{PhI}(\text{OPiv})_2$  (0.15 mmol, 1.5 equiv.) under argon atmosphere. MeCN (0.50 mL) was added at 0 °C and then  $\text{Py}\cdot 9\text{HF}$  (0.15 mmol, 1.5 equiv.) was added dropwise at the same temperature. The mixture was stirred at 0 °C for 30 min and filtered through silica pad. After washed with  $\text{CH}_2\text{Cl}_2$  three times, the filtrate was concentrated in vacuo. The residue was dissolved in  $\text{CH}_2\text{Cl}_2$  (0.50 mL) and treated with corresponding amine (0.20 mmol, 2.0 equiv.) and  $\text{Et}_3\text{N}$  (0.20 mmol, 2.0 equiv.) at 0 °C. The mixture was stirred at room temperature for 3 h. After quenched with water, the mixture was extracted with  $\text{CH}_2\text{Cl}_2$ , dried over  $\text{Na}_2\text{SO}_4$ , and concentrated in vacuo. The residue was purified by flash column chromatography on silica gel with hexanes-ethyl acetate as eluent.

**General Procedure F:** A reaction tube with magnetic stirring bar was charged with substrate (0.10 mmol) and  $\text{PhI}(\text{OPiv})_2$  (0.15 mmol, 1.5 equiv.) under argon atmosphere. MeCN (0.50 mL) was added at 0 °C and then  $\text{Py}\cdot 9\text{HF}$  (0.15 mmol, 1.5 equiv.) was added dropwise at the same temperature. The mixture was stirred at 0 °C for 30 min and filtered through silica pad. After washed with  $\text{CH}_2\text{Cl}_2$  three times, the filtrate was concentrated in vacuo. The residue was dissolved in  $\text{CH}_2\text{Cl}_2$  (0.50 mL) and treated with oxazolidine-2-one (0.10 mmol, 1.0 equiv.), 4-DMAP (0.10 mmol, 1.0 equiv.), and  $\text{Et}_3\text{N}$  (0.20 mmol, 2.0 equiv.) at 0 °C. The mixture was stirred at room temperature for 3 h. After quenched with water, the mixture was extracted with  $\text{CH}_2\text{Cl}_2$ , dried over  $\text{Na}_2\text{SO}_4$ , and concentrated in vacuo. The residue was purified by flash column chromatography on silica gel with hexanes-ethyl acetate as eluent.

**General Procedure G:** A reaction tube with magnetic stirring bar was charged with substrate (0.10 mmol) and  $\text{PhI}(\text{OPiv})_2$  (0.15 mmol, 1.5 equiv.) under argon atmosphere. MeCN (0.50 mL) was added at 0 °C and then  $\text{Py}\cdot 9\text{HF}$  (0.15 mmol, 1.5 equiv.) was added dropwise at the same temperature. The mixture was stirred at 0 °C for 30 min and filtered through silica pad. After washed with  $\text{CH}_2\text{Cl}_2$  three times, the filtrate was concentrated in vacuo. The residue was dissolved in  $\text{CH}_2\text{Cl}_2$  (0.5 mL) and treated with corresponding alcohol (1.0 mmol, 10 equiv.), 4-DMAP (0.10 mmol, 1.0 equiv.), and  $\text{Et}_3\text{N}$  (0.20 mmol, 2.0 equiv.) at 0 °C. The mixture was stirred at room temperature for overnight. After quenched with water, the mixture was

extracted with CH<sub>2</sub>Cl<sub>2</sub>, dried over Na<sub>2</sub>SO<sub>4</sub>, and concentrated in vacuo. The residue was purified by flash column chromatography on silica gel with hexanes-ethyl acetate as eluent.

**General Procedure H:** A reaction tube with magnetic stirring bar was charged with substrate (0.10 mmol) and PhI(OPiv)<sub>2</sub> (0.15 mmol, 1.5 equiv.) under argon atmosphere. MeCN (2.0 mL) was added at –10 °C and then Py•9HF (0.15 mmol, 1.5 equiv.) was added dropwise at the same temperature. The mixture was stirred at –10 °C for 30 min and filtered through silica pad. After washed with CH<sub>2</sub>Cl<sub>2</sub> three times, the filtrate was concentrated in vacuo. The residue was dissolved in CH<sub>2</sub>Cl<sub>2</sub> (1.0 mL) and treated with corresponding amine hydrochloride (0.20 mmol, 2.0 equiv.) and DIPEA (0.40 mmol, 4.0 equiv.) at 0 °C. The mixture was stirred at room temperature for 3 h. After quenched with water, the mixture was extracted with CH<sub>2</sub>Cl<sub>2</sub>, dried over Na<sub>2</sub>SO<sub>4</sub>, and concentrated in vacuo. The residue was purified by flash column chromatography on silica gel with hexanes-ethyl acetate as eluent.

## 7-2. Amide (or Ester) Products

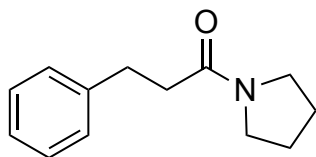

### 3-Phenyl-1-(pyrrolidin-1-yl)propan-1-one (4a)

Prepared following general procedure E using 4-hydroxyphenyl 3-phenylpropanoate (48 mg, 0.20 mmol, 1.0 equiv.) and pyrrolidine (32  $\mu$ L, 0.40 mmol, 2.0 equiv.). Purification by flash column chromatography on silica gel (eluent : hexane/ethyl acetate 2/1 to 1/1) afforded 39 mg (95% yield) of the title compound.

Colorless oil

**$^1\text{H}$  NMR (400 MHz,  $\text{CDCl}_3$ )**  $\delta$  7.28-7.24 (m, 2H), 7.21-7.15 (m, 3H), 3.42 (t,  $J$  = 6.4 Hz, 2H), 3.26 (t,  $J$  = 6.4 Hz, 2H), 2.96 (t,  $J$  = 7.6 Hz, 2H), 2.54 (t,  $J$  = 7.6 Hz, 2H), 1.89-1.76 (m, 4H).

**$^{13}\text{C}$  NMR (100 MHz,  $\text{CDCl}_3$ )**  $\delta$  170.7, 141.4, 128.3, 128.3, 126.0, 46.4, 45.5, 36.7, 31.1, 25.9, 24.3.

**HRMS** (ESI-TOF) Calcd. for  $\text{C}_{13}\text{H}_{17}\text{NONa}$ : 226.1202 ( $[\text{M} + \text{Na}]^+$ ), Found: 226.1201.

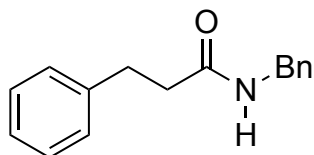

***N*-Benzyl-3-phenylpropanamide (4b)**

Prepared following general procedure E using 4-hydroxyphenyl 3-phenylpropanoate (24 mg, 0.10 mmol, 1.0 equiv.) and benzylamine (22  $\mu$ L, 0.20 mmol, 2.0 equiv.). Purification by flash column chromatography on silica gel (eluent : hexane/ethyl acetate 2/1 to 1/1) afforded 22 mg (92% yield) of the title compound.

White solid

**$^1\text{H}$  NMR (400 MHz,  $\text{CDCl}_3$ )**  $\delta$  7.30-7.17 (m, 10H), 5.93 (brs, 1H), 4.35 (d,  $J = 5.6\text{Hz}$ , 2H), 2.96 (t,  $J = 7.6\text{ Hz}$ , 2H), 2.49 (t,  $J = 7.6\text{ Hz}$ , 2H).

**$^{13}\text{C}$  NMR (100 MHz,  $\text{CDCl}_3$ )**  $\delta$  171.9, 140.6, 138.0, 128.5, 128.4, 128.3, 127.5, 127.3, 126.1, 43.3, 38.3, 31.6.

**HRMS** (ESI-TOF) Calcd.for  $\text{C}_{16}\text{H}_{17}\text{NONa}$ : 262.1202 ( $[\text{M} + \text{Na}]^+$ ), Found: 262.1202.

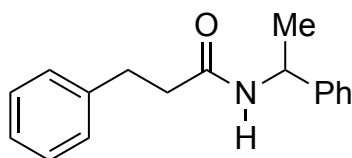

### 3-Phenyl-*N*-(1-phenylethyl)propenamide (4c)

Prepared following general procedure E using 4-hydroxyphenyl 3-phenylpropanoate (24 mg, 0.10 mmol, 1.0 equiv.) and 1-phenylethylamine (25  $\mu$ L, 0.20 mmol, 2.0 equiv.). Purification by flash column chromatography on silica gel (eluent : hexane/ethyl acetate 2/1 to 1/1) afforded 23 mg (95% yield) of the title compound.

White solid

**$^1\text{H}$  NMR (400 MHz,  $\text{CDCl}_3$ )**  $\delta$  7.31-7.16 (m, 10H), 5.59 (d,  $J$  = 6.4 Hz, 1H), 5.12-5.05 (m, 1H), 2.95 (t,  $J$  = 7.6 Hz, 2H), 2.46 (t,  $J$  = 7.6 Hz, 2H), 1.39 (d,  $J$  = 6.8 Hz, 3H).

**$^{13}\text{C}$  NMR (100 MHz,  $\text{CDCl}_3$ )**  $\delta$  171.0, 142.9, 140.7, 128.5, 128.5, 128.3, 127.2, 126.1, 126.1, 48.5, 38.5, 31.6, 21.5.

**HRMS** (ESI-TOF) Calcd. for  $\text{C}_{17}\text{H}_{19}\text{NONa}$ : 276.1359 ( $[\text{M} + \text{Na}]^+$ ), Found: 276.1359.

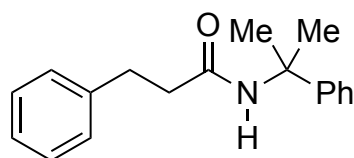

### 3-Phenyl-*N*-(2-phenylpropan-2-yl)propenamide (4d)

Prepared following general procedure E using 4-hydroxyphenyl 3-phenylpropanoate (24 mg, 0.10 mmol, 1.0 equiv.) and 2-phenylpropan-2-amine (26 mg, 0.20 mmol, 2.0 equiv.). Purification by flash column chromatography on silica gel (eluent : hexane/ethyl acetate 4/1) afforded 22 mg (78% yield) of the title compound.

White solid

**<sup>1</sup>H NMR (400 MHz, CDCl<sub>3</sub>)** δ 7.31-7.18 (m, 10H), 5.59 (brs, 1H), 2.94 (t, *J* = 7.6 Hz, 2H), 2.45 (t, *J* = 7.6 Hz, 2H), 1.62 (s, 6H).

**<sup>13</sup>C NMR (100 MHz, CDCl<sub>3</sub>)** δ 170.9, 146.6, 140.9, 128.5, 128.4, 128.3, 126.5, 126.1, 124.6, 55.8, 39.1, 31.5, 28.9.

**HRMS** (ESI-TOF) Calcd. for C<sub>18</sub>H<sub>21</sub>NONa: 290.1515 ([M + Na]<sup>+</sup>), Found: 290.1515.

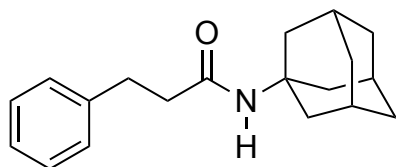

***N*-((3*s*,5*s*,7*s*)-adamantan-1-yl)-3-phenylpropanamide (4e)**

Prepared following general procedure E using 4-hydroxyphenyl 3-phenylpropanoate (24 mg, 0.10 mmol, 1.0 equiv.) and 1-adamantylamine (30 mg, 0.20 mmol, 2.0 equiv.). Purification by flash column chromatography on silica gel (eluent : hexane/ethyl acetate 4/1) afforded 25 mg (88% yield) of the title compound.

White solid

**<sup>1</sup>H NMR (400 MHz, CDCl<sub>3</sub>)** δ 7.28-7.25(m, 3H), 7.22-7.17 (m, 2H), 4.97 (brs, 1H), 2.91 (t, *J* = 7.6 Hz, 2H), 2.36 (t, *J* = 7.6 Hz, 2H), 2.02 (s, 3H), 1.91 (s, 6H), 1.63 (s, 6H).

**<sup>13</sup>C NMR (100 MHz, CDCl<sub>3</sub>)** δ 171.1, 141.0, 128.4, 128.4, 126.0, 51.7, 41.5, 39.5, 39.5, 31.7, 29.3.

**HRMS** (ESI-TOF) Calcd.for C<sub>19</sub>H<sub>25</sub>NONa: 306.1828 ([M + Na]<sup>+</sup>), Found: 306.1830.

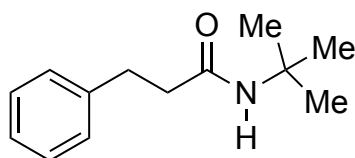

***N*-(*tert*-butyl)-3-phenylpropanamide (4f)**

Prepared following general procedure E using 4-hydroxyphenyl 3-phenylpropanoate (24 mg, 0.10 mmol, 1.0 equiv.) and *tert*-butylamine (21  $\mu$ L, 0.20 mmol, 2.0 equiv.). Purification by flash column chromatography on silica gel (eluent : hexane/ethyl acetate 4/1) afforded 19 mg (92% yield) of the title compound.

White solid

**$^1\text{H}$  NMR (400 MHz,  $\text{CDCl}_3$ )**  $\delta$  7.28-7.22 (m, 3H), 7.19-7.17 (m, 2H), 5.09 (brs, 1H), 2.92 (t,  $J = 7.6$  Hz, 2H), 2.36 (t,  $J = 7.6$  Hz, 2H), 1.26 (s, 9H).

**$^{13}\text{C}$  NMR (100 MHz,  $\text{CDCl}_3$ )**  $\delta$  171.3, 141.0, 128.4, 128.4, 126.1, 51.0, 39.4, 31.7, 28.6.

**HRMS** (ESI-TOF) Calcd. for  $\text{C}_{13}\text{H}_{19}\text{NONa}$ : 228.1359 ( $[\text{M} + \text{Na}]^+$ ), Found: 228.1357.

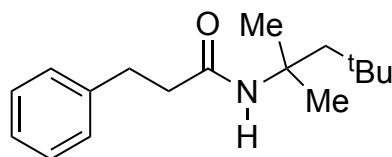

### 3-Phenyl-*N*-(2,4,4-trimethylpentan-2-yl)propenamide (4g)

Prepared following general procedure E using 4-hydroxyphenyl 3-phenylpropanoate (24 mg, 0.10 mmol, 1.0 equiv.) and 2,4,4-trimethylpentan-2-amine (26 mg, 0.20 mmol, 2.0 equiv.). Purification by flash column chromatography on silica gel (eluent : hexane/ethyl acetate 4/1) afforded 23 mg (88% yield) of the title compound.

White solid

**<sup>1</sup>H NMR (400 MHz, CDCl<sub>3</sub>)** δ 7.28-7.24 (m, 2H), 7.19-7.13 (m, 3H), 5.12 (brs, 1H), 2.91 (t, *J* = 7.6 Hz, 2H), 2.36 (t, *J* = 7.6 Hz, 2H), 1.65 (s, 2H), 1.32 (s, 6H), 0.92 (s, 9H).

**<sup>13</sup>C NMR (100 MHz, CDCl<sub>3</sub>)** δ 170.9, 141.0, 128.4, 128.4, 126.1, 55.0, 51.5, 39.6, 31.5, 31.5, 31.3, 29.0.

**HRMS (ESI-TOF)** Calcd. for C<sub>17</sub>H<sub>27</sub>NONa: 284.1985 ([M + Na]<sup>+</sup>), Found: 284.1990.

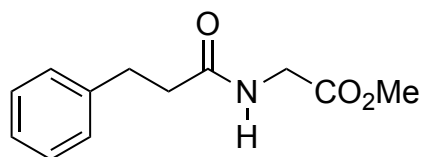

### Methyl (3-phenylpropanoyl)glycinate (4h)

Prepared following general procedure E using 4-hydroxyphenyl 3-phenylpropanoate (48 mg, 0.20 mmol, 1.0 equiv.), glycine methyl ester hydrochloride (50 mg, 0.40 mmol, 2.0 equiv.), and triethylamine (0.11 mL, 0.40 mmol, 4.0 equiv.). Purification by flash column chromatography on silica gel (eluent : hexane/ethyl acetate 2/1 to 1/1) afforded 39 mg (88% yield) of the title compound.

White solid

**<sup>1</sup>H NMR (400 MHz, CDCl<sub>3</sub>)** δ 7.28-7.24 (m, 2H), 7.19-7.16 (m, 3H), 5.98 (s, 1H), 4.00 (d, *J* = 5.2 Hz, 2 H), 3.73 (s, 3H), 2.96 (t, *J* = 7.6 Hz, 2H), 2.53 (t, *J* = 7.6 Hz, 2H).

**<sup>13</sup>C NMR (100 MHz, CDCl<sub>3</sub>)** δ 172.2, 170.4, 140.5, 128.4, 128.2, 126.2, 52.3, 41.1, 37.9, 31.3.

**HRMS (ESI-TOF)** Calcd. for C<sub>12</sub>H<sub>15</sub>NO<sub>3</sub>Na: 244.0944 ([M + Na]<sup>+</sup>), Found: 244.0943.

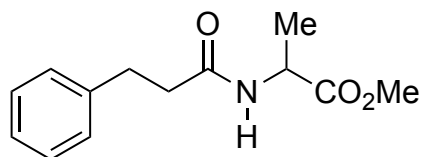

### Methyl (3-phenylpropanoyl)alaninate (4i)

Prepared following general procedure E using 4-hydroxyphenyl 3-phenylpropanoate (24 mg, 0.10 mmol, 1.0 equiv.), alanine methyl ester hydrochloride (28 mg, 0.20 mmol, 2.0 equiv.), and triethylamine (56  $\mu$ g, 0.40 mmol, 4.0 equiv.). Purification by flash column chromatography on silica gel (eluent : hexane/ethyl acetate 2/1 to 1/1) afforded 22 mg (94% yield) of the title compound.

White solid

**$^1\text{H}$  NMR (400 MHz,  $\text{CDCl}_3$ )**  $\delta$  7.87-7.24 (m, 2H), 7.19-7.17 (m, 3H), 5.96 (d,  $J$  = 5.6 Hz, 1H), 4.60-4.53 (m, 1H), 3.71 (s, 3H), 2.95 (t,  $J$  = 7.6 Hz, 2H), 2.56-2.45 (m, 2H), 1.32 (d,  $J$  = 7.2 Hz, 3H).

**$^{13}\text{C}$  NMR (100 MHz,  $\text{CDCl}_3$ )**  $\delta$  173.5, 171.4, 140.6, 128.4, 128.3, 126.2, 52.4, 47.8, 38.1, 31.4, 18.4.

**HRMS** (ESI-TOF) Calcd. for  $\text{C}_{13}\text{H}_{17}\text{NO}_3\text{Na}$ : 258.1101 ( $[\text{M} + \text{Na}]^+$ ), Found: 258.1102.

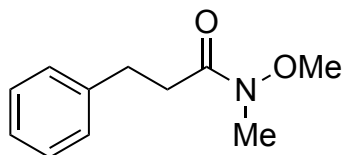

***N*-Methoxy-*N*-methyl-3-phenylpropanamide (4j)**

Prepared following general procedure F using 4-hydroxyphenyl 3-phenylpropanoate (24 mg, 0.10 mmol, 1.0 equiv.). Purification by flash column chromatography on silica gel (eluent : hexane/ethyl acetate 5/1) afforded 18 mg (93% yield) of the title compound.

Colorless oil

**<sup>1</sup>H NMR (400 MHz, CDCl<sub>3</sub>)** δ 7.30-7.17(m, 5H), 3.59 (s, 3H), 3.16 (s, 3H), 2.95 (t, *J* = 7.6 Hz, 2H), 2.73 (t, *J* = 7.6 Hz, 2H).

**<sup>13</sup>C NMR (100 MHz, CDCl<sub>3</sub>)** δ 173.6, 141.3, 128.4, 128.4, 126.0, 61.1, 33.7, 32.1, 30.6.

**HRMS (ESI-TOF)** Calcd. for C<sub>11</sub>H<sub>15</sub>NO<sub>2</sub>Na: 216.0995 ([M + Na]<sup>+</sup>), Found: 216.0994.

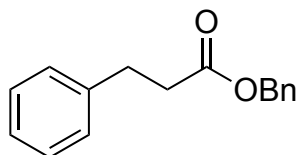

**Benzyl 3-phenylpropanoate (9k)**

Prepared following general procedure G using 4-hydroxyphenyl 3-phenylpropanoate (48 mg, 0.20 mmol, 1.0 equiv.) and benzyl alcohol (0.20 mL, 2.0 mmol, 10 equiv.). Purification by flash column chromatography on silica gel (eluent : hexane/ethyl acetate 20/1) afforded 46 mg (95% yield) of the title compound.

Colorless oil

**<sup>1</sup>H NMR (400 MHz, CDCl<sub>3</sub>)**  $\delta$  7.37-7.12(m, 10H), 5.11 (s, 2H), 2.97 (t,  $J$  = 7.6 Hz, 2H), 2.68 (t,  $J$  = 7.6 Hz, 2H).

**<sup>13</sup>C NMR (100 MHz, CDCl<sub>3</sub>)**  $\delta$  172.7, 140.3, 135.8, 128.5, 128.4, 128.2, 128.1, 126.2, 66.2, 35.8, 30.8.

**HRMS (ESI-TOF)** Calcd. for C<sub>16</sub>H<sub>16</sub>NO<sub>2</sub>Na: 263.1043 ([M + Na]<sup>+</sup>), Found: 263.1042.

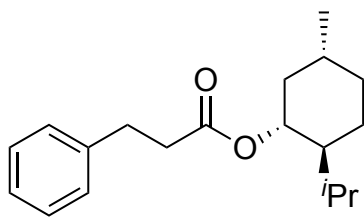

**(1*R*,2*S*,5*R*)-2-Isopropyl-5-methylcyclohexyl 3-phenylpropanoate (9l)**

Prepared following general procedure G using 4-hydroxyphenyl 3-phenylpropanoate (24 mg, 0.10 mmol, 1.0 equiv.) and (1*R*,2*S*,5*R*)-(-)-Menthol (156 mg, 1.0 mmol, 10 equiv.). Purification by flash column chromatography on silica gel (eluent : hexane/ethyl acetate 20/1) afforded 21 mg (73% yield) of the title compound.

Colorless oil

**<sup>1</sup>H NMR (400 MHz, CDCl<sub>3</sub>)** δ 7.28-7.25(m, 2H), 7.20-7.16 (m, 3H), 4.66 (td, *J* = 10.8, 4.4 Hz, 1H), 2.94 (t, *J* = 7.6 Hz, 2H), 2.60 (t, *J* = 7.6 Hz, 2H), 1.93-1.91 (m, 1H), 1.75-1.61 (m, 3H), 1.50-1.42 (m, 1H), 1.35-1.24 (m, 1H), 1.01 (qd, *J* = 14.0, 4.4 Hz, 1H), 0.88-0.82 (m, 8H), 0.69 (d, *J* = 7.2 Hz, 3H).

**<sup>13</sup>C NMR (100 MHz, CDCl<sub>3</sub>)** δ 172.5, 140.5, 128.4, 128.2, 126.1, 74.1, 46.9, 40.8, 36.1, 34.1, 31.3, 31.0, 26.0, 23.3, 21.9, 20.7, 16.2.

**HRMS (ESI-TOF)** Calcd.for C<sub>19</sub>H<sub>28</sub>NO<sub>2</sub>Na: 311.1982 ([M + Na]<sup>+</sup>), Found: 311.1979.

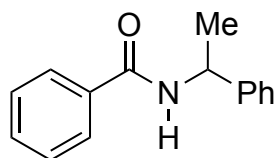

***N*-(1-Phenylethyl)benzamide (8m)**

Prepared following general procedure H using 4-hydroxyphenyl benzoate (21 mg, 0.10 mmol, 1.0 equiv.) and 1-phenylethylamine (25  $\mu$ L, 0.20 mmol, 2.0 equiv.). Purification by flash column chromatography on silica gel (eluent : hexane/ethyl acetate 7/1) afforded 17 mg (76% yield) of the title compound.

White solid

**$^1\text{H}$  NMR (400 MHz,  $\text{CDCl}_3$ )**  $\delta$  7.77-7.74(m, 2H), 7.50-7.46 (m, 1H), 7.42-7.32 (m, 6H), 7.29-7.24 (m, 1H), 6.35 (brs, 1H), 5.36.-5.29 (m, 1H), 1.50 (d,  $J$  = 6.8 Hz, 3H).

**$^{13}\text{C}$  NMR (100 MHz,  $\text{CDCl}_3$ )**  $\delta$  166.5, 143.0, 134.5, 131.4, 128.7, 128.4, 127.4, 126.8, 126.2, 49.1, 21.6.

**HRMS** (ESI-TOF) Calcd.for  $\text{C}_{15}\text{H}_{15}\text{NONa}$ : 248.1046 ( $[\text{M} + \text{Na}]^+$ ), Found: 248.1043.

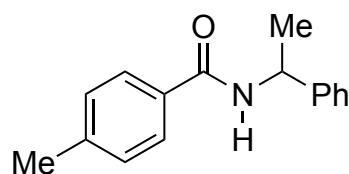

#### 4-Methyl-N-(1-phenylethyl)benzamide (8n)

Prepared following general procedure E using 4-hydroxyphenyl 4-methylbenzoate (23 mg, 0.10 mmol, 1.0 equiv.) and 1-phenylethylamine (25  $\mu$ L, 0.20 mmol, 2.0 equiv.). Purification by flash column chromatography on silica gel (eluent : hexane/ethyl acetate 7/1) afforded 20 mg (84% yield) of the title compound.

White solid

**$^1\text{H}$  NMR (400 MHz,  $\text{CDCl}_3$ )**  $\delta$  7.66 (d,  $J$  = 8.0 Hz, 2H), 7.39-7.32 (m, 4H), 7.28-7.25 (m, 1H), 7.20 (d,  $J$  = 8.0 Hz, 2H), 6.37 (d,  $J$  = 6.8 Hz, 1H), 5.36-5.29 (m, 1H), 2.37 (s, 3H), 1.58 (d,  $J$  = 6.8 Hz, 3H).

**$^{13}\text{C}$  NMR (100 MHz,  $\text{CDCl}_3$ )**  $\delta$  166.4, 143.1, 141.8, 131.6, 129.1, 128.6, 127.3, 126.8, 126.2, 49.0, 21.7, 21.3.

**HRMS** (ESI-TOF) Calcd. for  $\text{C}_{16}\text{H}_{17}\text{NONa}$ : 262.1202 ( $[\text{M} + \text{Na}]^+$ ), Found: 262.1203.

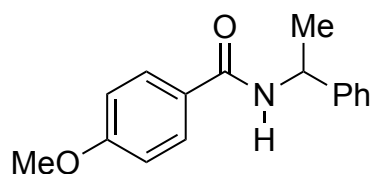

**4-Methoxy-N-(1-phenylethyl)benzamide (8o)**

Prepared following general procedure E using 4-hydroxyphenyl 4-methoxybenzoate (24 mg, 0.10 mmol, 1.0 equiv.) and 1-phenylethylamine (25  $\mu$ L, 0.20 mmol, 2.0 equiv.). Purification by flash column chromatography on silica gel (eluent : hexane/ethyl acetate 7/1) afforded 23 mg (90% yield) of the title compound.

White solid

**$^1\text{H}$  NMR (400 MHz,  $\text{CDCl}_3$ )**  $\delta$  7.73 (d,  $J$  = 8.8 Hz, 2H), 7.39-7.31 (m, 4H), 7.27-7.24 (m, 1H), 6.88 (d,  $J$  = 8.8 Hz, 2H), 6.31 (d,  $J$  = 7.2 Hz, 1H), 5.34-5.27 (m, 1H), 3.82 (s, 3H), 1.57 (d,  $J$  = 7.2 Hz, 3H).

**$^{13}\text{C}$  NMR (100 MHz,  $\text{CDCl}_3$ )**  $\delta$  166.0, 162.1, 143.2, 128.6, 128.6, 127.3, 126.7, 126.2, 113.6, 55.3, 49.0, 21.7.

**HRMS** (ESI-TOF) Calcd. for  $\text{C}_{16}\text{H}_{17}\text{NO}_2\text{Na}$ : 278.1152 ( $[\text{M} + \text{Na}]^+$ ), Found: 278.1149.

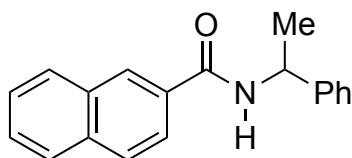

***N*-(1-Phenylethyl)-2-naphthamide (8p)**

Prepared following general procedure E using 4-hydroxyphenyl 2-naphthoate (26 mg, 0.10 mmol, 1.0 equiv.) and 1-phenylethylamine (25  $\mu$ L, 0.20 mmol, 2.0 equiv.). Purification by flash column chromatography on silica gel (eluent : hexane/ethyl acetate 9/1) afforded 24 mg (87% yield) of the title compound.

White solid

**$^1\text{H}$  NMR (400 MHz,  $\text{CDCl}_3$ )**  $\delta$  8.27 (s, 1H), 7.89-7.81 (m, 4H), 7.57-7.49 (m, 2H), 7.44-7.25 (m, 5H), 6.55 (d,  $J = 7.2$  Hz, 1H), 5.43-5.36 (m, 1H), 1.64 (d,  $J = 7.2$  Hz, 3H).

**$^{13}\text{C}$  NMR (100 MHz,  $\text{CDCl}_3$ )**  $\delta$  166.6, 143.0, 134.6, 132.5, 131.7, 128.8, 128.7, 128.4, 127.7, 127.6, 127.4, 127.3, 126.7, 126.3, 123.5, 49.3, 21.7.

**HRMS** (ESI-TOF) Calcd. for  $\text{C}_{19}\text{H}_{17}\text{NONa}$ : 298.1202 ( $[\text{M} + \text{Na}]^+$ ), Found: 298.1204.

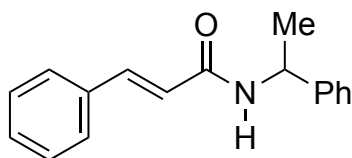

***N*-(1-Phenylethyl)cinnamamide (8q)**

Prepared following general procedure E using 4-hydroxyphenyl cinnamate (24 mg, 0.10 mmol, 1.0 equiv.) and 1-phenylethylamine (25  $\mu$ L, 0.20 mmol, 2.0 equiv.). Purification by flash column chromatography on silica gel (eluent : hexane/ethyl acetate 7/1) afforded 24 mg (96% yield) of the title compound.

White solid

**$^1\text{H}$  NMR (400 MHz,  $\text{CDCl}_3$ )**  $\delta$  7.63 (d,  $J$  = 15.6 Hz, 1H), 7.48-7.46 (m, 2H), 7.37-7.32 (m, 7H), 7.29-7.27 (m, 1H), 6.39 (d,  $J$  = 15.6 Hz, 1H), 5.93 (d,  $J$  = 7.2 Hz, 1H), 5.31-5.24 (m, 1H), 1.56 (d,  $J$  = 7.2 Hz, 3H).

**$^{13}\text{C}$  NMR (100 MHz,  $\text{CDCl}_3$ )**  $\delta$  164.9, 143.0, 141.2, 134.7, 129.6, 128.7, 127.7, 127.4, 126.2, 120.5, 48.9, 21.6.

**HRMS** (ESI-TOF) Calcd. for  $\text{C}_{17}\text{H}_{17}\text{NONa}$ : 274.1202 ( $[\text{M} + \text{Na}]^+$ ), Found: 274.1202.

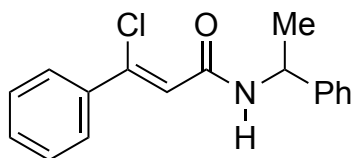

**(Z)-3-Chloro-3-phenyl-N-(1-phenylethyl)acrylamide (8r)**

Prepared following general procedure E using 4-hydroxyphenyl (Z)-3-chloro-3-phenylacrylate (27 mg, 0.10 mmol, 1.0 equiv.) and 1-phenylethylamine (25  $\mu$ L, 0.20 mmol, 2.0 equiv.). Purification by flash column chromatography on silica gel (eluent : hexane/ethyl acetate 7/1) afforded 26 mg (91% yield) of the title compound.

White solid

**$^1\text{H}$  NMR (400 MHz,  $\text{CDCl}_3$ )**  $\delta$  7.61-7.58 (m, 2H), 7.40-7.33 (m, 7H), 7.29-7.25 (m, 1H), 6.62 (d,  $J$  = 6.8 Hz, 1H), 6.05 (s, 1H), 5.29-5.22 (m, 1H), 1.58 (d,  $J$  = 6.8 Hz, 3H);

**$^{13}\text{C}$  NMR (100 MHz,  $\text{CDCl}_3$ )**  $\delta$  163.2, 142.7, 138.8, 136.9, 130.1, 128.7, 128.5, 127.4, 126.9, 126.2, 121.1, 49.1, 21.8;

**HRMS** (ESI-TOF) Calcd. for  $\text{C}_{17}\text{H}_{16}\text{NOClNa}$ : 308.0813 ( $[\text{M} + \text{Na}]^+$ ), Found: 308.0817.

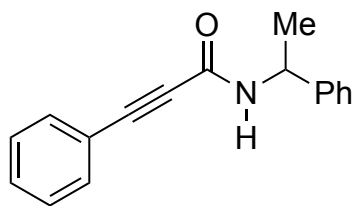

### 3-Phenyl-*N*-(1-phenylethyl)propiolamide (8s)

Prepared following general procedure E using 4-hydroxyphenyl 3-phenylpropiolate (24 mg, 0.10 mmol, 1.0 equiv.) and 1-phenylethylamine (25  $\mu$ L, 0.20 mmol, 2.0 equiv.). Purification by flash column chromatography on silica gel (eluent : hexane/ethyl acetate 7/1) afforded 20 mg (80% yield) of the title compound.

White solid

**$^1\text{H}$  NMR (400 MHz,  $\text{CDCl}_3$ )**  $\delta$  7.44-7.42 (m, 2H), 7.39-7.18 (m, 8H), 6.16 (d,  $J$  = 7.2 Hz, 1H), 5.18-5.11 (m, 1H), 1.48 (d,  $J$  = 6.8 Hz, 3H);

**$^{13}\text{C}$  NMR (100 MHz,  $\text{CDCl}_3$ )**  $\delta$  152.4, 142.1, 132.4, 130.0, 128.7, 128.4, 127.6, 126.2, 120.1, 84.7, 83.0, 49.3, 21.4.

**HRMS** (ESI-TOF) Calcd. for  $\text{C}_{17}\text{H}_{15}\text{NONa}$ : 272.1046 ( $[\text{M} + \text{Na}]^+$ ), Found: 272.1046.

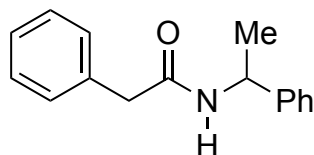

**2-Phenyl-*N*-(1-phenylethyl)acetamide (8t)**

Prepared following general procedure E using 4-hydroxyphenyl 2-phenylacetate (23 mg, 0.10 mmol, 1.0 equiv.) and 1-phenylethylamine (25  $\mu$ L, 0.20 mmol, 2.0 equiv.). Purification by flash column chromatography on silica gel (eluent : hexane/ethyl acetate 2/1) afforded 20 mg (84% yield) of the title compound.

White solid

**$^1\text{H}$  NMR (400 MHz,  $\text{CDCl}_3$ )**  $\delta$  7.36-7.33 (m, 2H), 7.30-7.21 (m, 6H), 7.19-7.17 (m, 2H), 5.67 (brs, 1H), 5.14-5.08 (m, 1H), 3.56 (s, sH), 1.38 (d,  $J = 7.2$  Hz, 3H).

**$^{13}\text{C}$  NMR (100 MHz,  $\text{CDCl}_3$ )**  $\delta$  169.9, 143.0, 134.8, 129.3, 128.9, 128.5, 127.3, 127.2, 125.9, 48.6, 43.8, 21.7.

**HRMS** (ESI-TOF) Calcd. for  $\text{C}_{16}\text{H}_{17}\text{NONa}$ : 262.1202 ( $[\text{M} + \text{Na}]^+$ ), Found: 262.1199.

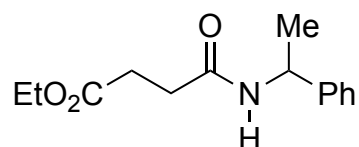

**Ethyl 4-oxo-4-((1-phenylethyl)amino)butanoate (8u)**

Prepared following general procedure E using ethyl (4-hydroxyphenyl) succinate (24 mg, 0.10 mmol, 1.0 equiv.) and 1-phenylethylamine (25  $\mu$ L, 0.20 mmol, 2.0 equiv.). Purification by flash column chromatography on silica gel (eluent : hexane/ethyl acetate 3/1) afforded 22 mg (88% yield) of the title compound.

White solid

**$^1\text{H}$  NMR (400 MHz,  $\text{CDCl}_3$ )**  $\delta$  7.34-7.29 (m, 4H), 7.27-7.23 (m, 1H), 7.13-7.11 (m, 2H), 6.02 (d,  $J$  = 5.2 Hz, 1H), 5.14-5.07 (m, 1H), 4.12 (q,  $J$  = 7.2 Hz, 2H), 2.72-2.25 (m, 2H), 2.52-2.42 (m, 2H), 1.47 (d,  $J$  = 6.8 Hz, 3H), 1.23 (d,  $J$  = 7.2 Hz, 3H).

**$^{13}\text{C}$  NMR (100 MHz,  $\text{CDCl}_3$ )**  $\delta$  173.0, 170.4, 143.1, 128.5, 127.2, 126.0, 60.6, 48.7, 31.1, 29.5, 21.7, 14.1.

**HRMS** (ESI-TOF) Calcd. for  $\text{C}_{14}\text{H}_{19}\text{NO}_3\text{Na}$ : 272.1257 ( $[\text{M} + \text{Na}]^+$ ), Found: 272.1257.

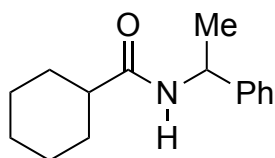

***N*-(1-Phenylethyl)cyclohexanecarboxamide (8v)**

Prepared following general procedure E using 4-hydroxyphenyl cyclohexanecarboxylate (22 mg, 0.10 mmol, 1.0 equiv.) and 1-phenylethylamine (25  $\mu$ L, 0.20 mmol, 2.0 equiv.). Purification by flash column chromatography on silica gel (eluent : hexane/ethyl acetate 3/1) afforded 21 mg (91% yield) of the title compound.

White solid

**$^1\text{H}$  NMR (400 MHz,  $\text{CDCl}_3$ )**  $\delta$  7.35-7.23 (m, 5H), 5.67 (brs, 1H), 5.16-5.09 (m, 1H), 2.10-2.02 (m, 1H), 1.88-1.72 (m, 4H), 1.66-1.65 (m, 1H), 1.47 (d,  $J$  = 6.8 Hz, 3H), 1.47-1.37 (m, 2H), 1.29-1.17 (m, 3H).

**$^{13}\text{C}$  NMR (100 MHz,  $\text{CDCl}_3$ )**  $\delta$  152.4, 142.1, 132.4, 130.0, 128.7, 128.4, 127.6, 126.2, 120.1, 84.7, 83.0, 49.3, 21.4.

**HRMS** (ESI-TOF) Calcd. for  $\text{C}_{15}\text{H}_{21}\text{NONa}$ : 254.1515 ( $[\text{M} + \text{Na}]^+$ ), Found: 254.1514.

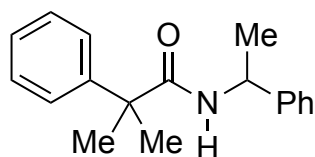

### 2-Methyl-2-phenyl-N-(1-phenylethyl)propenamide (8w)

Prepared following general procedure E using 4-Hydroxyphenyl 2-methyl-2-phenylpropanoate (25 mg, 0.10 mmol, 1.0 equiv.) and 1-phenylethylamine (25  $\mu$ L, 0.20 mmol, 2.0 equiv.). Purification by flash column chromatography on silica gel (eluent : hexane/ethyl acetate 5/1) afforded 21 mg (79% yield) of the title compound.

White solid

**$^1\text{H}$  NMR (400 MHz,  $\text{CDCl}_3$ )**  $\delta$  7.36-7.30 (m, 4H), 7.29-7.20 (m, 4H), 7.13-7.11 (m, 2H), 5.32 (brs, 1H), 5.32-5.03 (m, 1H), 1.58 (s, 3H), 1.55 (s, 3H), 1.32 (d,  $J$  = 6.8 Hz, 3H).

**$^{13}\text{C}$  NMR (100 MHz,  $\text{CDCl}_3$ )**  $\delta$  176.4, 145.1, 143.3, 128.6, 128.4, 127.0, 126.9, 126.3, 125.8, 48.6, 46.9, 27.0, 26.9, 21.6.

**HRMS** (ESI-TOF) Calcd. for  $\text{C}_{18}\text{H}_{21}\text{NONa}$ : 290.1515 ( $[\text{M} + \text{Na}]^+$ ), Found: 290.1515.

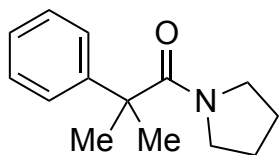

**2-Methyl-2-phenyl-1-(pyrrolidin-1-yl)propan-1-one (8x)**

Prepared following general procedure E using 4-hydroxyphenyl 2-methyl-2-phenylpropanoate (25 mg, 0.10 mmol, 1.0 equiv.) and pyrrolidine (16  $\mu$ L, 0.20 mmol, 2.0 equiv.). Purification by flash column chromatography on silica gel (eluent : hexane/ethyl acetate 5/1) afforded 17 mg (78% yield) of the title compound.

Colorless oil

**$^1\text{H}$  NMR (400 MHz,  $\text{CDCl}_3$ )**  $\delta$  7.33-7.29 (m, 2H), 7.27-7.20 (m, 3H), 3.51 (t,  $J = 7.2$  Hz, 2H), 2.71 (t,  $J = 7.2$  Hz, 2H), 1.71-1.65 (m, 2H), 1.59-1.54 (m, 2H), 1.54 (s, 6H).

**$^{13}\text{C}$  NMR (100 MHz,  $\text{CDCl}_3$ )**  $\delta$  174.9, 145.9, 128.6, 126.2, 125.3, 47.3, 47.1, 46.9, 27.3, 26.5, 23.1.

**HRMS** (ESI-TOF) Calcd. for  $\text{C}_{14}\text{H}_{19}\text{NONa}$ : 240.1359 ( $[\text{M} + \text{Na}]^+$ ), Found: 240.1345.

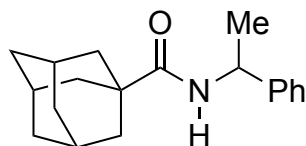

**(3*r*,5*r*,7*r*)-*N*-(1-Phenylethyl)adamantane-1-carboxamide (8y)**

Prepared following general procedure E using 4-hydroxyphenyl (3*r*,5*r*,7*r*)-adamantane-1-carboxylate (27 mg, 0.10 mmol, 1.0 equiv.) and pyrrolidine (16  $\mu$ L, 0.20 mmol, 2.0 equiv.). Purification by flash column chromatography on silica gel (eluent : hexane/ethyl acetate 5/1) afforded 23 mg (84% yield) of the title compound.

White solid

**$^1\text{H}$  NMR (400 MHz,  $\text{CDCl}_3$ )**  $\delta$  7.35-7.23 (m, 5H), 5.79 (d,  $J$  = 6.4 Hz, 1H), 5.15-5.08 (m, 1H), 2.03 (s, 3H), 1.85 (d,  $J$  = 0.8 Hz, 6H), 1.75-1.67 (m, 6H), 1.46 (d,  $J$  = 6.8 Hz, 3H).

**$^{13}\text{C}$  NMR (100 MHz,  $\text{CDCl}_3$ )**  $\delta$  176.9, 143.5, 128.5, 127.1, 125.9, 48.0, 40.4, 39.1, 36.4, 28.0, 21.7.

**HRMS** (ESI-TOF) Calcd. for  $\text{C}_{19}\text{H}_{25}\text{NONa}$ : 306.1828 ( $[\text{M} + \text{Na}]^+$ ), Found: 306.1831.

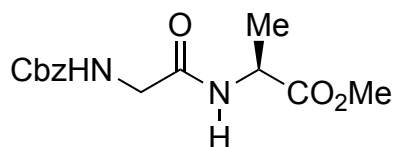

**Methyl ((benzyloxy)carbonyl)glycyl-L-alaninate (12a)**

*N*-Cbz-Gly-L-Ala-OMe

Prepared following general procedure H using 4-hydroxyphenyl ((benzyloxy)carbonyl)glycinate (30 mg, 0.10 mmol, 1.0 equiv.) and L-alanine methyl ester hydrochloride (28 mg, 0.20 mmol, 2.0 equiv.). Purification by flash column chromatography on silica gel (eluent : hexane/ethyl acetate 2/1 to 1/2) afforded 26 mg (88% yield) of the title compound.

White solid

**<sup>1</sup>H NMR (400 MHz, CDCl<sub>3</sub>)** δ 7.39-7.31 (m, 5H), 6.59 (brs, 1H), 5.47 (brs, 1H), 5.13 (s, 2H), 4.63-4.55 (m, 1H), 3.96-3.84 (m, 2H), 3.74 (s, 3H), 1.40 (d, *J* = 6.8 Hz, 3H).

**<sup>13</sup>C NMR (100 MHz, CDCl<sub>3</sub>)** δ 173.1, 168.4, 156.5, 136.0, 128.5, 128.2, 128.1, 67.2, 52.5, 48.0, 44.4, 18.3.

**HRMS (ESI-TOF)** Calcd. for C<sub>14</sub>H<sub>18</sub>N<sub>2</sub>O<sub>4</sub>Na: 317.1108 ([M + Na]<sup>+</sup>), Found: 317.1106.

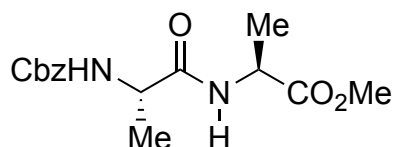

**Methyl ((benzyloxy)carbonyl)-L-alanyl-L-alaninate (12b)**

*N*-Cbz-L-Ala-L-Ala-OMe

Prepared following general procedure H using 4-hydroxyphenyl ((benzyloxy)carbonyl)-L-alaninate (31 mg, 0.10 mmol, 1.0 equiv.) and L-alanine methyl ester hydrochloride (28 mg, 0.20 mmol, 2.0 equiv.). Purification by flash column chromatography on silica gel (eluent : hexane/ethyl acetate 2/1 to 1/2) afforded 27 mg (87% yield) of the title compound.

White solid

**<sup>1</sup>H NMR (400 MHz, CDCl<sub>3</sub>)** δ 7.38-7.30 (m, 5H), 6.56 (brs, 1H), 5.36 (brs, 1H), 4.11 (s, 2H), 4.56 (q, *J* = 7.2 Hz, 1H), 4.29-4.23 (m, 1H), 3.75 (s, 3H), 1.39 (d, *J* = 6.8 Hz, 3H).

**<sup>13</sup>C NMR (100 MHz, CDCl<sub>3</sub>)** δ 173.1, 171.1, 155.8, 136.1, 128.5, 128.2, 128.0, 67.0, 52.5, 50.3, 48.0, 18.6, 18.2.

**HRMS (ESI-TOF)** Calcd. for C<sub>15</sub>H<sub>20</sub>N<sub>2</sub>O<sub>5</sub>Na: 331.1264 ([M + Na]<sup>+</sup>), Found: 331.1267.

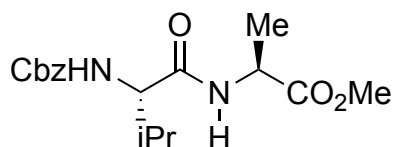

**Methyl ((benzyloxy)carbonyl)-L-valyl-L-alaninate (12c)**

*N*-Cbz-L-Val-L-Ala-OMe

Prepared following general procedure H using 4-hydroxyphenyl ((benzyloxy)carbonyl)-L-valinate (34 mg, 0.10 mmol, 1.0 equiv.) and L-alanine methyl ester hydrochloride (28 mg, 0.20 mmol, 2.0 equiv.). Purification by flash column chromatography on silica gel (eluent : hexane/ethyl acetate 2/1 to 1/1) afforded 27 mg (80% yield) of the title compound.

White solid

**<sup>1</sup>H NMR (400 MHz, CDCl<sub>3</sub>)** δ 7.39-7.27 (m, 5H), 6.33 (d, *J* = 7.2 Hz, 1H), 5.35 (d, *J* = 7.6 Hz, 1H), 5.09 (s, 2H), 4.60-4.53 (m, 1H), 4.02-3.98 (s, 1H), 3.73 (s, 3H), 2.15-2.06 (m, 1H), 1.39 (d, *J* = 7.2 Hz, 3H), 0.96 (d, *J* = 6.8 Hz, 3H), 0.91 (d, *J* = 6.8 Hz, 3H).

**<sup>13</sup>C NMR (100 MHz, CDCl<sub>3</sub>)** δ 173.1, 170.7, 156.3, 136.1, 128.4, 128.1, 128.0, 66.0, 60.1, 52.4, 47.9, 31.3, 19.0, 18.1, 17.7.

**HRMS (ESI-TOF)** Calcd. for C<sub>17</sub>H<sub>24</sub>N<sub>2</sub>O<sub>5</sub>Na: 359.1577 ([M + Na]<sup>+</sup>), Found: 359.1588.

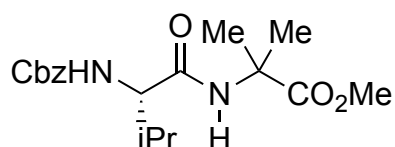

**Methyl (S)-2-(2-(((benzyloxy)carbonyl)amino)-3-methylbutanamido)-2-methylpropanoate (12d)**

*N*-Cbz-L-Val-Aib-OMe

Prepared following general procedure H using 4-hydroxyphenyl ((benzyloxy)carbonyl)-L-valinate (34 mg, 0.10 mmol, 1.0 equiv.) and 2-aminoisobutyric acid methyl ester hydrochloride (31 mg, 0.20 mmol, 2.0 equiv.). Purification by flash column chromatography on silica gel (eluent : hexane/ethyl acetate 2/1 to 1/1) afforded 27 mg (77% yield) of the title compound.

White solid

**<sup>1</sup>H NMR (400 MHz, CDCl<sub>3</sub>)** δ 7.37-7.29 (m, 5H), 6.48 (brs, 1H), 5.38 (d, *J* = 8.8 Hz, 1H), 5.10 (s, 2H), 3.98-3.94 (m, 1H), 3.71 (s, 3H), 2.16-2.06 (m, 1H), 1.52 (s, 6H), 0.96 (d, *J* = 6.8 Hz, 3H), 0.92 (d, *J* = 6.8 Hz, 3H).

**<sup>13</sup>C NMR (100 MHz, CDCl<sub>3</sub>)** δ 174.6, 170.2, 156.3, 136.2, 128.5, 128.1, 127.9, 66.9, 60.2, 56.4, 52.5, 31.1, 24.7, 24.5, 19.0, 17.6.

**HRMS** (ESI-TOF) Calcd. for C<sub>18</sub>H<sub>26</sub>N<sub>2</sub>O<sub>5</sub>Na: 373.1734 ([M + Na]<sup>+</sup>), Found: 373.1737.

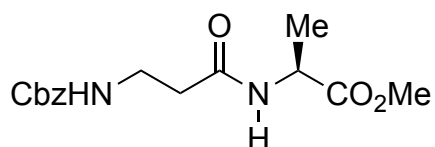

**Methyl (3-(((benzyloxy)carbonyl)amino)propanoyl)-L-alaninate (12e)**

*N*-Cbz-β-Ala-L-Ala-OMe

Prepared following general procedure H using 4-hydroxyphenyl 3-(((benzyloxy)carbonyl)amino)propanoate (31 mg, 0.10 mmol, 1.0 equiv.) and L-alanine methyl ester hydrochloride (28 mg, 0.20 mmol, 2.0 equiv.). Purification by flash column chromatography on silica gel (eluent : hexane/ethyl acetate 2/1 to 1/2) afforded 27 mg (88% yield) of the title compound.

White solid

**<sup>1</sup>H NMR (400 MHz, CDCl<sub>3</sub>)** δ 7.46-7.27 (m, 5H), 6.21 (d, *J* = 7.2 Hz, 1H), 5.49 (brs, 1H), 5.06 (s, 2H), 4.58-4.51 (m, 1H), 3.72 (s, 3H), 3.49-3.41 (m, 2H), 2.43 (d, *J* = 5.6 Hz, 2H), 1.36 (d, *J* = 7.2 Hz, 3H).

**<sup>13</sup>C NMR (100 MHz, CDCl<sub>3</sub>)** δ 173.3, 170.9, 156.4, 136.4, 128.4, 128.0, 127.9, 66.5, 52.5, 47.9, 36.9, 35.7, 18.1.

**HRMS** (ESI-TOF) Calcd. for C<sub>15</sub>H<sub>20</sub>N<sub>2</sub>O<sub>5</sub>Na: 331.1264 ([M + Na]<sup>+</sup>), Found: 331.1271.

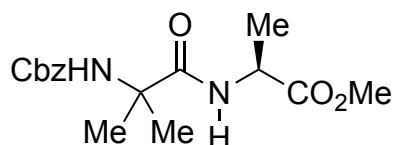

**Methyl (2-(((benzyloxy)carbonyl)amino)-2-methylpropanoyl)-L-alaninate (12f)**

*N*-Cbz-Aib-L-Ala-OMe

Prepared following general procedure H using 4-hydroxyphenyl 2-(((benzyloxy)carbonyl)amino)-2-methylpropanoate (33 mg, 0.10 mmol, 1.0 equiv.) and L-alanine methyl ester hydrochloride (28 mg, 0.20 mmol, 2.0 equiv.). Purification by flash column chromatography on silica gel (eluent : hexane/ethyl acetate 2/1 to 1/1) afforded 30 mg (93% yield) of the title compound.

White solid

**<sup>1</sup>H NMR (400 MHz, CDCl<sub>3</sub>)** δ 7.33-7.27 (m, 5H), 6.70 (brs, 1H), 5.33 (brs, 1H), 5.07 (s, 2H), 4.52 (t, *J* = 6.8 Hz, 2H), 3.71 (s, 3H), 1.51 (d, *J* = 5.2 Hz, 3H), 1.33 (s, 3H).

**<sup>13</sup>C NMR (100 MHz, CDCl<sub>3</sub>)** δ 173.7, 173.4, 154.9, 133.6, 128.5, 128.1, 128.0, 66.7, 56.7, 52.4, 48.1, 25.6, 25.1, 18.1.

**HRMS** (ESI-TOF) Calcd. for C<sub>16</sub>H<sub>22</sub>N<sub>2</sub>O<sub>5</sub>Na: 335.1421 ([M + Na]<sup>+</sup>), Found: 345.1236.

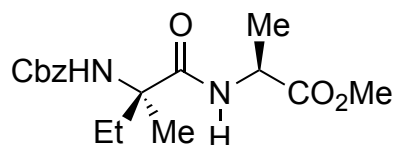

**Methyl ((*R*)-2-(((benzyloxy)carbonyl)amino)-2-methylbutanoyl)-L-alaninate (12g)**

*N*-Cbz-D-Iva-L-Ala-OMe

Prepared following general procedure H using 4-hydroxyphenyl (*R*)-2-amino-2-methylbutanoate (34 mg, 0.10 mmol, 1.0 equiv.) and L-alanine methyl ester hydrochloride (28 mg, 0.20 mmol, 2.0 equiv.). Purification by flash column chromatography on silica gel (eluent : hexane/ethyl acetate 2/1 to 1/1) afforded 28 mg (83% yield) of the title compound.

White solid

**<sup>1</sup>H NMR (400 MHz, CDCl<sub>3</sub>)** δ 7.62-7.27 (m, 5H), 6.62 (brs, 1H), 5.55 (brs, 1H), 5.06 (s, 2H), 4.56-4.52 (m, 1H), 3.72 (s, 3H), 2.08 (brs, 1H), 1.78-1.69 (m, 1H), 1.54 (d, *J* = 3.2 Hz, 3H), 0.83 (d, *J* = 8.8 Hz, 3H).

**<sup>13</sup>C NMR (100 MHz, CDCl<sub>3</sub>)** δ 173.3, 173.0, 154.7, 136.3, 128.5, 128.1, 127.9, 66.5, 60.1, 52.4, 48.1, 30.7, 22.7, 18.1, 8.0.

**HRMS (ESI-TOF)** Calcd. for C<sub>17</sub>H<sub>24</sub>N<sub>2</sub>O<sub>5</sub>Na: 359.1577 ([M + Na]<sup>+</sup>), Found: 359.1588.

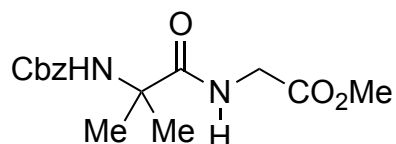

**Mthyl (2-(((benzyloxy)carbonyl)amino)-2-methylpropanoyl)glycinate (12h)**

*N*-Cbz-Aib-Gly-OMe

Prepared following general procedure H using 4-hydroxyphenyl 2-(((benzyloxy)carbonyl)amino)-2-methylpropanoate (33 mg, 0.10 mmol, 1.0 equiv.) and glycine methyl ester hydrochloride (25 mg, 0.20 mmol, 2.0 equiv.). Purification by flash column chromatography on silica gel (eluent : hexane/ethyl acetate 2/1 to 1/1) afforded 29 mg (93% yield) of the title compound.

White solid

**<sup>1</sup>H NMR (400 MHz, CDCl<sub>3</sub>)** δ 7.36-7.26 (m, 5H), 6.85 (brs, 1H), 5.37 (brs, 1H), 5.09 (s, 2H), 4.02 (brs, 1H), 3.74 (s, 3H), 1.54 (s, 6H).

**<sup>13</sup>C NMR (100 MHz, CDCl<sub>3</sub>)** δ 174.5, 170.4, 155.0, 136.0, 128.5, 128.1, 128.0, 66.7, 56.8, 56.5, 52.2, 41.3, 25.4.

**HRMS** (ESI-TOF) Calcd. for C<sub>15</sub>H<sub>20</sub>N<sub>2</sub>O<sub>5</sub>Na: 331.1264 ([M + Na]<sup>+</sup>), Found: 331.1265.

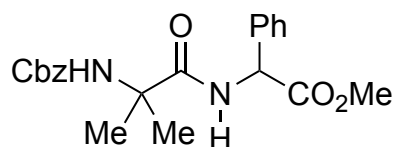

**Methyl 2-(2-(((benzyloxy)carbonyl)amino)-2-methylpropanamido)-2-phenylacetate (12i)**  
*N*-Cbz-Aib-Phg-OMe

Prepared following general procedure H using 4-hydroxyphenyl 2-(((benzyloxy)carbonyl)amino)-2-methylpropanoate (33 mg, 0.10 mmol, 1.0 equiv.) and 2-phenylglycine methyl ester hydrochloride (40 mg, 0.20 mmol, 2.0 equiv.). Purification by flash column chromatography on silica gel (eluent : hexane/ethyl acetate 2/1 to 1/1) afforded 35 mg (91% yield) of the title compound.

White solid

**<sup>1</sup>H NMR (400 MHz, CDCl<sub>3</sub>)** δ 7.39-7.27 (m, 10H), 5.50 (d, *J* = 6.8 Hz, 1H), 5.08 (s, 2H), 3.70 (s, 3H), 1.54 (s, 6H).

**<sup>13</sup>C NMR (100 MHz, CDCl<sub>3</sub>)** δ 173.6, 171.1, 155.0, 136.3, 136.2, 128.8, 128.5, 128.4, 128.1, 128.0, 127.1, 66.7, 56.8, 56.6, 52.7, 29.6, 25.2.

**HRMS** (ESI-TOF) Calcd. for C<sub>21</sub>H<sub>24</sub>N<sub>2</sub>O<sub>5</sub>Na: 407.1577 ([M + Na]<sup>+</sup>), Found: 407.1583.

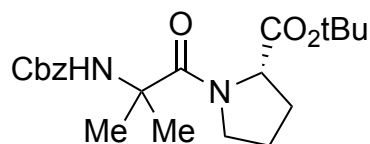

***tert*-Btyl (2-(((benzyloxy)carbonyl)amino)-2-methylpropanoyl)-L-prolinate (12j)**

*N*-Cbz-Aib-L-Pro-O<sup>t</sup>Bu

Prepared following general procedure H using 4-hydroxyphenyl 2-(((benzyloxy)carbonyl)amino)-2-methylpropanoate (33 mg, 0.10 mmol, 1.0 equiv.) and L-proline *tert*-butyl methyl ester hydrochloride (40 mg, 0.20 mmol, 2.0 equiv.). Purification by flash column chromatography on silica gel (eluent : hexane/ethyl acetate 2/1 to 1/1) afforded 36 mg (92% yield) of the title compound.

White solid

**<sup>1</sup>H NMR (400 MHz, CDCl<sub>3</sub>)** δ 7.32-7.27 (m, 5H), 5.77 (brs, 1H), 5.09-4.99 (m, 2H), 4.39 (brs, 1H), 3.67-3.62 (m, 1H), 3.51-3.42 (m, 1H), 2.06-1.89 (m, 2H), 1.85-1.74 (m, 2H), 1.64-1.59 (m, 3H), 1.55-1.51 (m, 3H), 1.41 (s, 9H).

**<sup>13</sup>C NMR (100 MHz, CDCl<sub>3</sub>)** δ 171.5, 154.1, 136.5, 128.4, 128.1, 128.0, 115.9, 80.9, 66.2, 61.7, 56.6, 47.9, 27.9, 27.7, 25.6, 24.3, 23.9.

**HRMS** (ESI-TOF) Calcd. for C<sub>21</sub>H<sub>30</sub>N<sub>2</sub>O<sub>5</sub>Na: 413.2047 ([M + Na]<sup>+</sup>), Found: 413.2046.

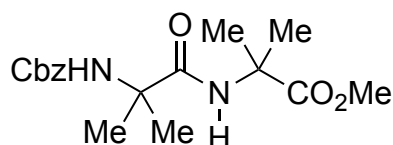

**Methyl 2-(2-(((benzyloxy)carbonyl)amino)-2-methylpropanamido)-2-methylpropanoate (12k)**

*N*-Cbz-Aib-Aib-OMe

Prepared following general procedure H using 4-hydroxyphenyl 2-(((benzyloxy)carbonyl)amino)-2-methylpropanoate (33 mg, 0.10 mmol, 1.0 equiv.), 2-aminoisobutyric acid methyl ester hydrochloride (31 mg, 0.20 mmol, 2.0 equiv.) and THF instead of CH<sub>2</sub>Cl<sub>2</sub> in amidation step for 3 days. Purification by flash column chromatography on silica gel (eluent : hexane/ethyl acetate 2/1) afforded 26 mg (77% yield) of the title compound.

White solid

**<sup>1</sup>H NMR (400 MHz, CDCl<sub>3</sub>)** δ 7.36-7.28 (m, 5H), 6.90 (brs, 1H), 5.30 (s, 2H), 5.08 (brs, 1H), 3.70 (s, 3H), 1.49 (m, 14H).

**<sup>13</sup>C NMR (100 MHz, CDCl<sub>3</sub>)** δ 175.0, 173.4, 155.0, 136.2, 128.5, 128.1, 128.0, 66.6, 56.9, 56.3, 52.5, 25.3, 24.4.

**HRMS (ESI-TOF)** Calcd. for C<sub>17</sub>H<sub>24</sub>N<sub>2</sub>O<sub>5</sub>Na: 359.1577 ([M + Na]<sup>+</sup>), Found: 359.1585.

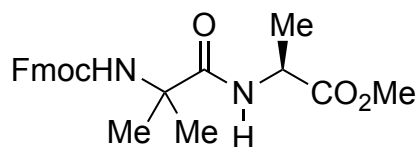

**Methyl (2-((((9H-fluoren-9-yl)methoxy)carbonyl)amino)-2-methylpropanoyl)-L-alaninate (12l)**

*N*-Fmoc-Aib-L-Ala-OMe

Prepared following general procedure H using 4-hydroxyphenyl 2-((((9H-fluoren-9-yl)methoxy)carbonyl)amino)-2-methylpropanoate (40 mg, 0.10 mmol, 1.0 equiv.) and L-alanine methyl ester hydrochloride (28 mg, 0.20 mmol, 2.0 equiv.). Purification by flash column chromatography on silica gel (eluent : hexane/ethyl acetate 2/1) afforded 37 mg (90% yield) of the title compound.

White solid

**<sup>1</sup>H NMR (400 MHz, CDCl<sub>3</sub>)** δ 7.75 (d, *J* = 7.6 Hz, 2H), 7.59-7.56 (m, 2H), 7.38 (t, *J* = 7.6 Hz, 2H), 7.30 (t, *J* = 7.6 Hz, 2H), 6.75 (brs, 1H), 5.39 (brs, 1H), 4.55-4.50 (m, 1H), 4.18 (d, *J* = 6.0 Hz, 2H), 4.19 (t, *J* = 6.8 Hz, 1H), 3.71 (s, 3H), 1.51 (s, 6H), 1.37 (d, *J* = 7.2 Hz, 3H).

**<sup>13</sup>C NMR (100 MHz, CDCl<sub>3</sub>)** δ 173.8, 173.3, 155.0, 143.7, 143.7, 141.2, 127.6, 127.0, 124.9, 119.9, 66.5, 56.7, 48.2, 47.1, 25.5, 25.0, 18.2.

**HRMS (ESI-TOF)** Calcd. for C<sub>23</sub>H<sub>26</sub>N<sub>2</sub>O<sub>5</sub>Na: 433.1734 ([M + Na]<sup>+</sup>), Found: 433.1742.

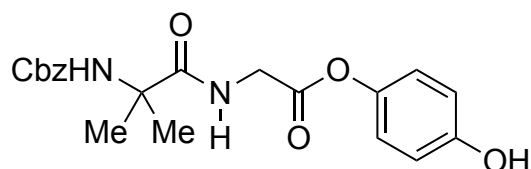

**4-Hdroxyphenyl (2-(((benzyloxy)carbonyl)amino)-2-methylpropanoyl)glycinate (13)**

*N*-Cbz-Aib-Gly-OPh(*p*-OH)

Prepared following general procedure H using 4-hydroxyphenyl 2-(((benzyloxy)carbonyl)amino)-2-methylpropanoate (33 mg, 0.10 mmol, 1.0 equiv.), 4-hydroxyphenyl glycinate (33 mg, 0.20 mmol, 2.0 equiv.), and THF instead of CH<sub>2</sub>Cl<sub>2</sub> in amidation step. Purification by flash column chromatography on silica gel (eluent : hexane/ethyl acetate 1/2) afforded 36 mg (93% yield) of the title compound.

White solid

**<sup>1</sup>H NMR (400 MHz, CD<sub>3</sub>OD)** δ 8.30 (t, *J* = 5.6 Hz, 1H), 7.33-7.26 (m, 5H), 6.92-6.90 (m, 2H), 6.77-6.74 (m, 2H), 5.05 (s, 2H), 4.11 (s, 2H), 1.47 (s, 6H).

**<sup>13</sup>C NMR (100 MHz, CD<sub>3</sub>OD)** δ 178.2, 170.5, 157.1, 156.4, 144.5, 138.0, 129.4, 128.9, 128.9, 123.2, 116.5, 67.4, 57.6, 42.5, 25.6.

**HRMS (ESI-TOF)** Calcd. for C<sub>20</sub>H<sub>22</sub>N<sub>2</sub>O<sub>6</sub>Na: 409.1370 ([M + Na]<sup>+</sup>), Found: 409.1376.

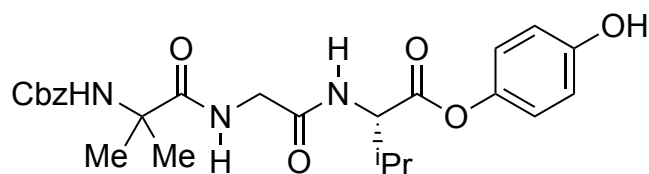

**Methyl (2-(((9H-fluoren-9-yl)methoxy)carbonyl)amino)-2-methylpropanoyl-L-alaninate (14)**

*N*-Cbz-Aib-Gly-L-Val-OPh(*p*-OH)

Prepared following general procedure H using 4-hydroxyphenyl (2-(((benzyloxy)carbonyl)amino)-2-methylpropanoyl)glycinate (38 mg, 0.10 mmol, 1.0 equiv.), 4-hydroxyphenyl L-valinate (41 mg, 0.20 mmol, 2.0 equiv.), and THF instead of CH<sub>2</sub>Cl<sub>2</sub> in amidation step. Purification by flash column chromatography on silica gel (eluent : CH<sub>2</sub>Cl<sub>2</sub>/ethyl acetate 1/2) afforded 43 mg (73% yield) of the title compound.

White solid

**<sup>1</sup>H NMR (400 MHz, CD<sub>3</sub>OD)** δ 7.31 (m, 5H), 6.92-6.87 (m, 2H), 6.78-6.74 (m, 2H), 5.10-4.99 (m, 2H), 4.50 (d, *J* = 7.2 Hz, 1H), 4.20 (d, *J* = 17.2 Hz, 1H), 3.75 (d, *J* = 17.2 Hz, 1H), 2.45-2.36 (m, 1H), 1.46 (s, 3H), 1.40 (s, 3H), 1.09 (d, *J* = 6.8 Hz, 3H), 1.08 (d, *J* = 6.8 Hz, 3H).

**<sup>13</sup>C NMR (100 MHz, CD<sub>3</sub>OD)** δ 177.9, 172.5, 172.1, 158.0, 156.5, 144.5, 137.9, 129.4, 128.9, 128.9, 123.2, 116.6, 67.8, 59.7, 57.7, 43.9, 31.6, 26.3, 24.8, 19.6, 19.0.

**HRMS** (ESI-TOF) Calcd. for C<sub>25</sub>H<sub>31</sub>N<sub>3</sub>O<sub>7</sub>Na: 508.2054 ([M + Na]<sup>+</sup>), Found: 508.2058.

## 8. Racemization Studies

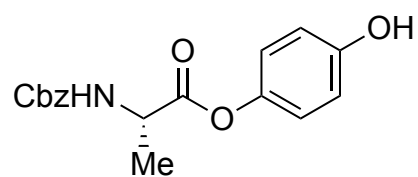

**HPLC analysis:** 99% ee, Daicel Chiralpak IA, hexane/i-PrOH = 3/1, flow rate = 1.3 mL/min,  $\lambda$  = 210 nm, retention time;  $t_R$  (major) = 7.0 min,  $t_R$  (minor) = 21.9 min.

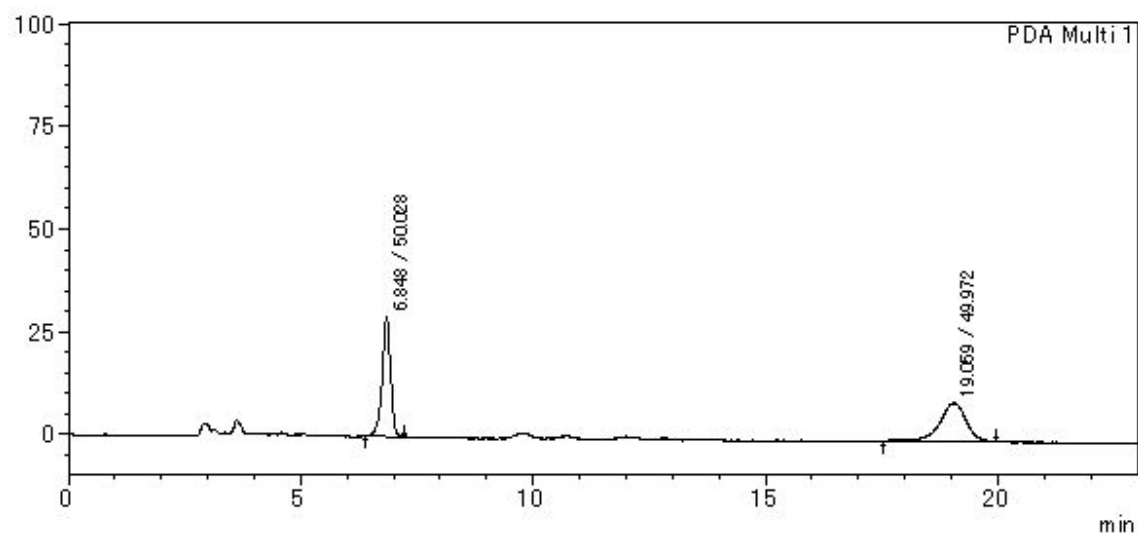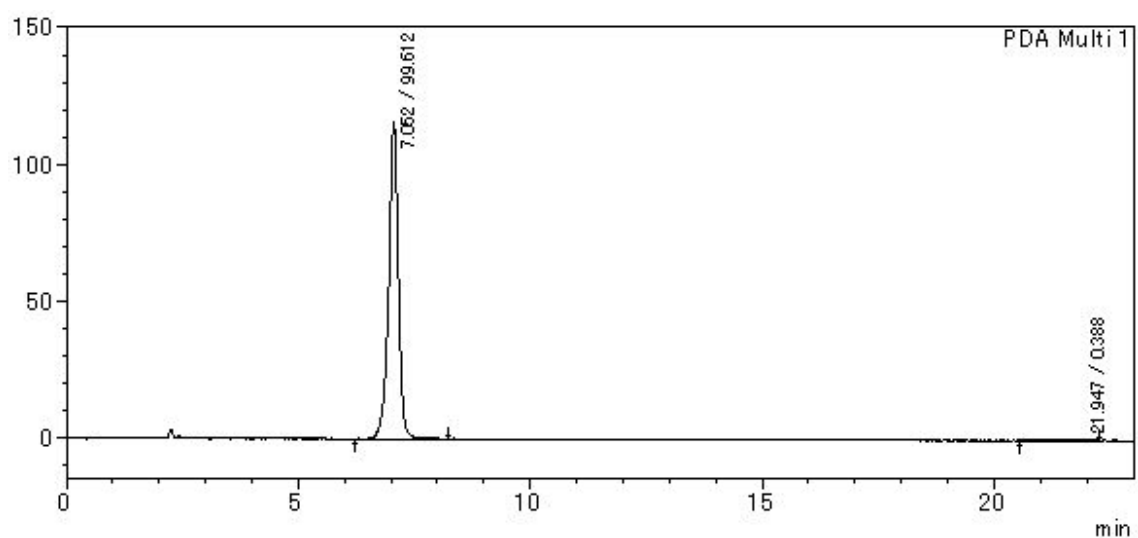

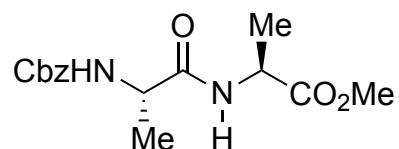

**HPLC analysis:** 99% ee, Daicel Chiralpak IG, hexane/i-PrOH = 10/1, flow rate = 1.0 mL/min,  $\lambda$  = 210 nm, retention time;  $t_R$  (major) = 47.1 min,  $t_R$  (minor) = 63.0 min.

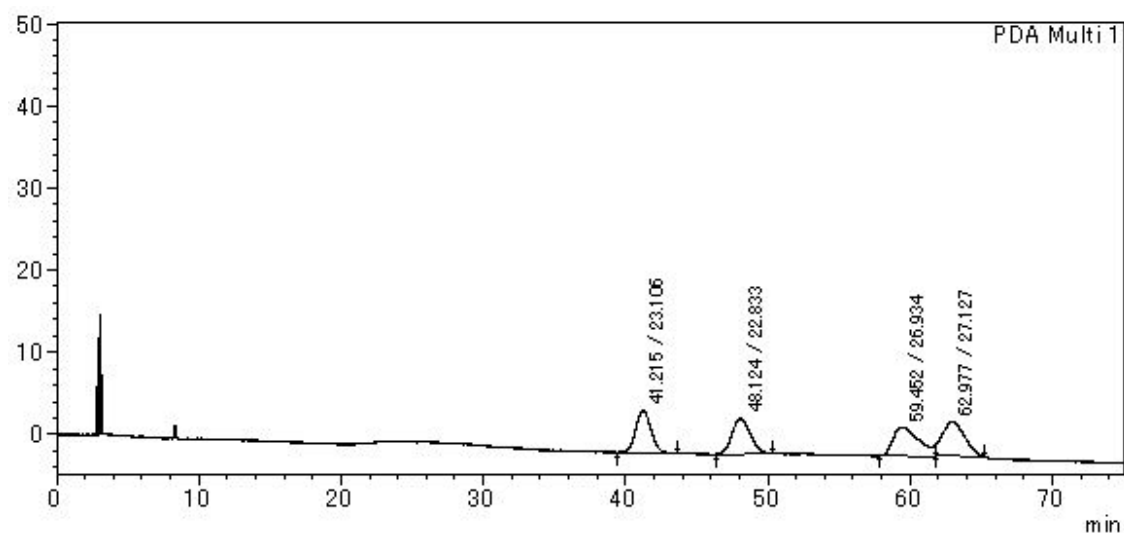

| Peak # | RetTime [min] | Area [mAU*s] | Area[%] |
|--------|---------------|--------------|---------|
| 1      | 41.215        | 390409       | 23.106  |
| 2      | 48.124        | 385811       | 22.833  |
| 3      | 59.452        | 455094       | 26.934  |
| 4      | 62.977        | 458359       | 27.127  |
| 合計     |               |              | 100.000 |

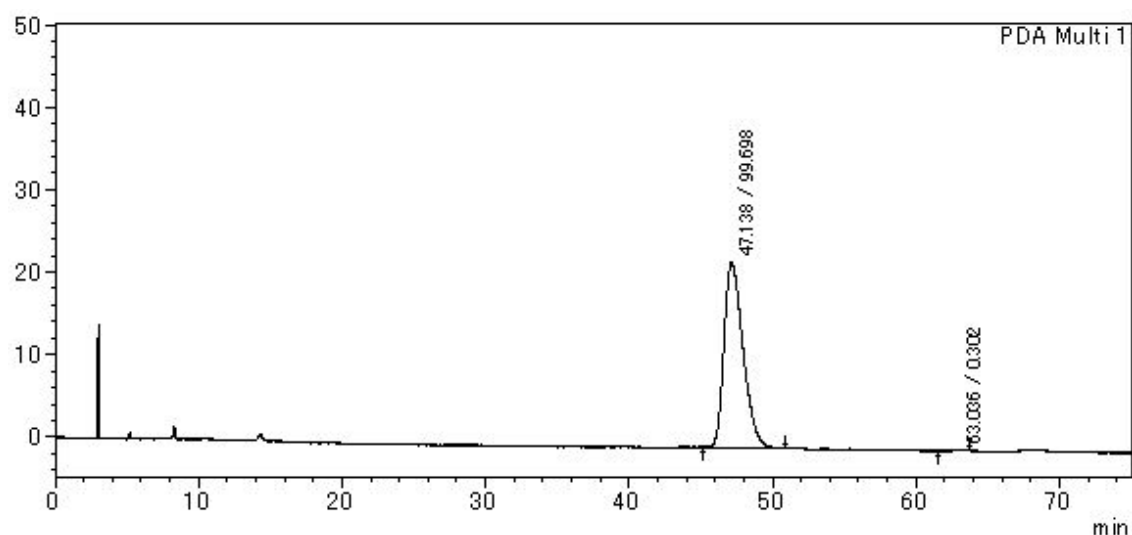

| Peak # | RetTime [min] | Area [mAU*s] | Area[%] |
|--------|---------------|--------------|---------|
| 1      | 47.138        | 2069753      | 99.698  |
| 2      | 63.036        | 6276         | 0.302   |
| 合計     |               |              | 100.000 |

## 9. References

- S1. M. J. Frisch, G. W. Trucks, H. B. *et al.* *Gaussian 16*, Revision B.01; Gaussian, Inc., Wallingford CT, 2016.
- S2. Y. Zhao, & D. G. Truhlar, *Theor. Chem. Acc.* **2008**, *120*, 215-241.
- S3. C. E. Check, T. O. Faust, J. M. Bailey, B. J. Wright, T. M. Gilbert, L. S. Sunderlin, *J. Phys. Chem. A* **2001**, *105*, 8111-8116.
- S4. K. Fukui, *Chem. Res.* **1981**, *14*, 363-368.
- S5. A. V. Marenich, C. J. Cramer, D. G. Truhlar, *J. Phys. Chem. B* **2009**, *113*, 6378-6396.
- S6. F. Weigend, R. Ahlrichs, *Phys. Chem. Chem. Phys.* **2005**, *7*, 3297-3305.
- S7. C. Y. Legault, CYLView, version 1.0b; Université de Sherbrooke: Sherbrooke, Quebec, Canada, 2009.
- S8. a) S. Sakaki, Y. Ohnishi, H. Sato, *The Chemical Record* **2010**, *10*, 29-45; b) A. Ishikawa, Y. Nakao, H. Sato, S. Sakaki, *S. Dalton Trans.* **2010**, *39*, 3279-3289; c) A. Ishikawa, Y. Nakao, H. Sato, S. Sakaki, *S. Inorg. Chem.* **2009**, *48*, 8154-8163; d) Y. Ohnishi, Y. Nakao, H. Sato, T. Hiyama, S. Sakaki, *Organometallics* **2009**, *28*, 2583-2594.
- S9. M. Mammen, E. I. Shakhnovich, J. M. Deutch, G. M. Whitesides, *J. Org. Chem.* **1998**, *63*, 3821-3830.
- S10. B. Ganji, A. Ariaifard, *Org. Biomol. Chem.* **2019**, *17*, 3521-3528.

## 10. Spectral data

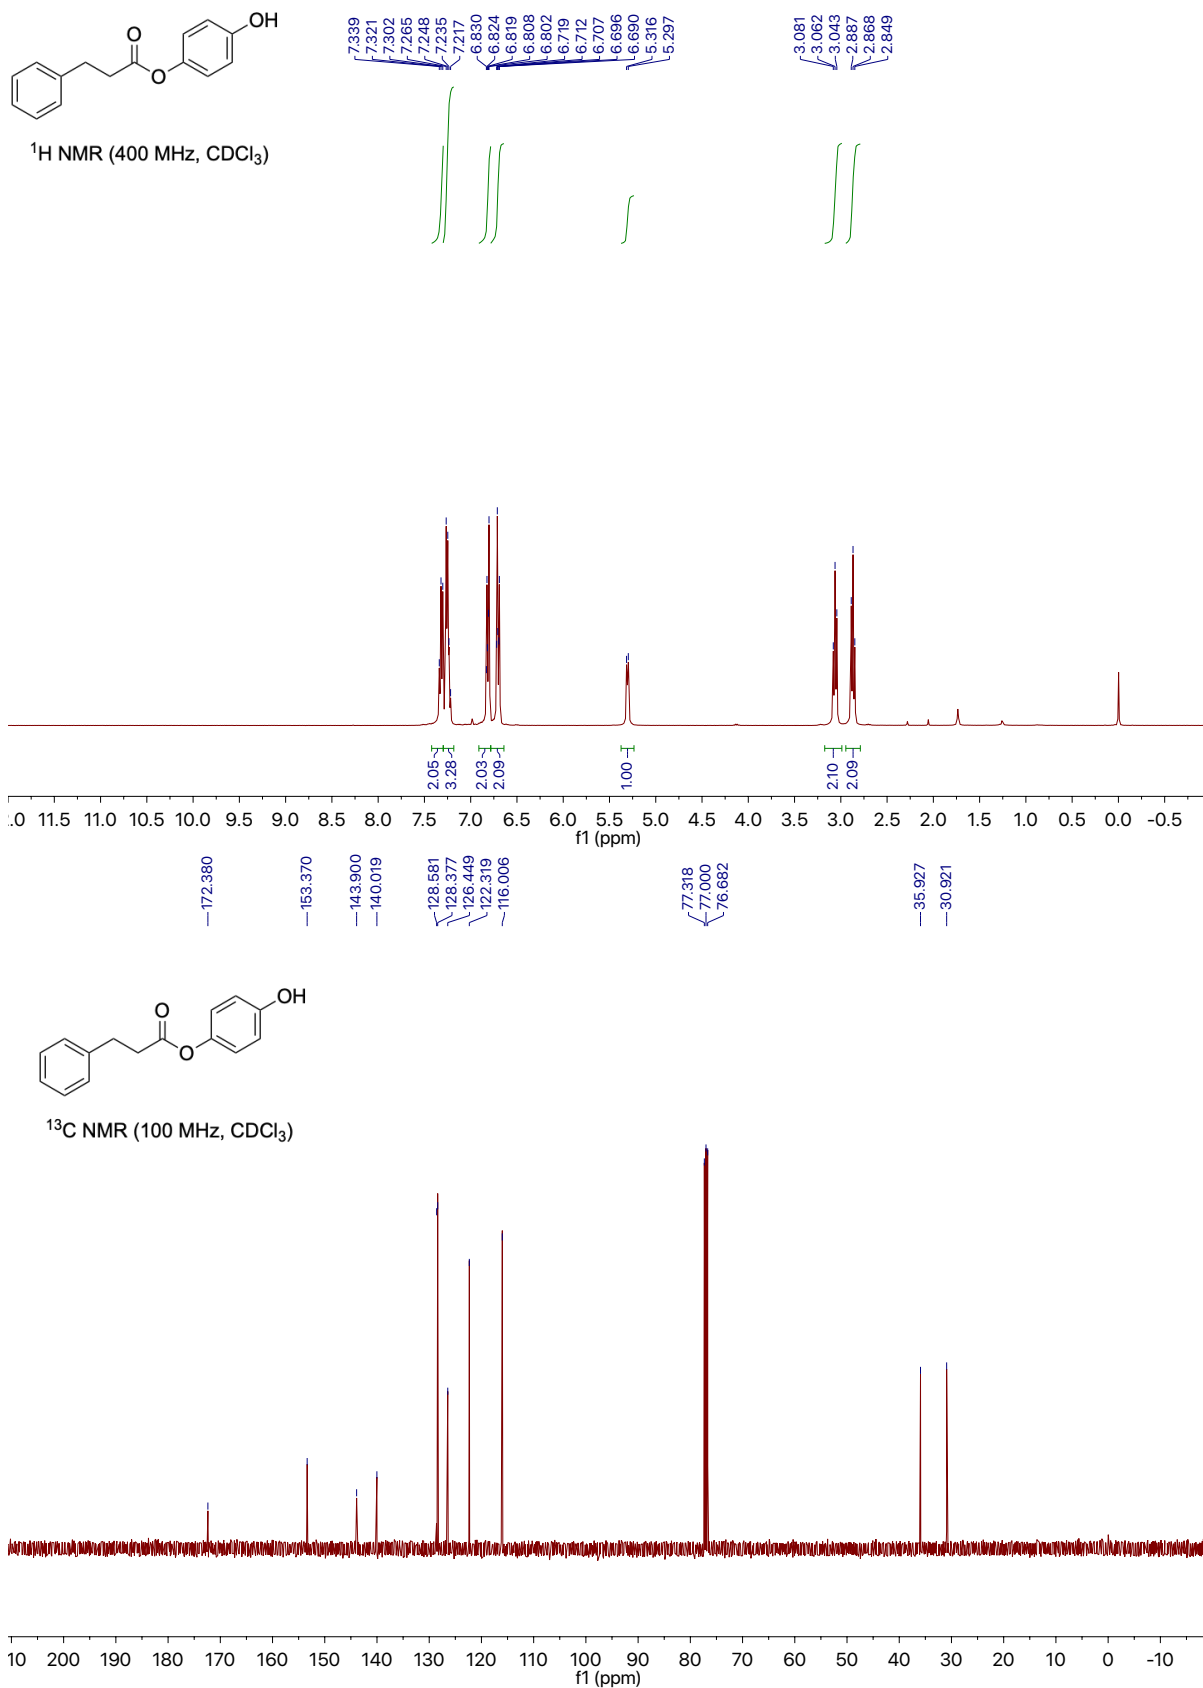

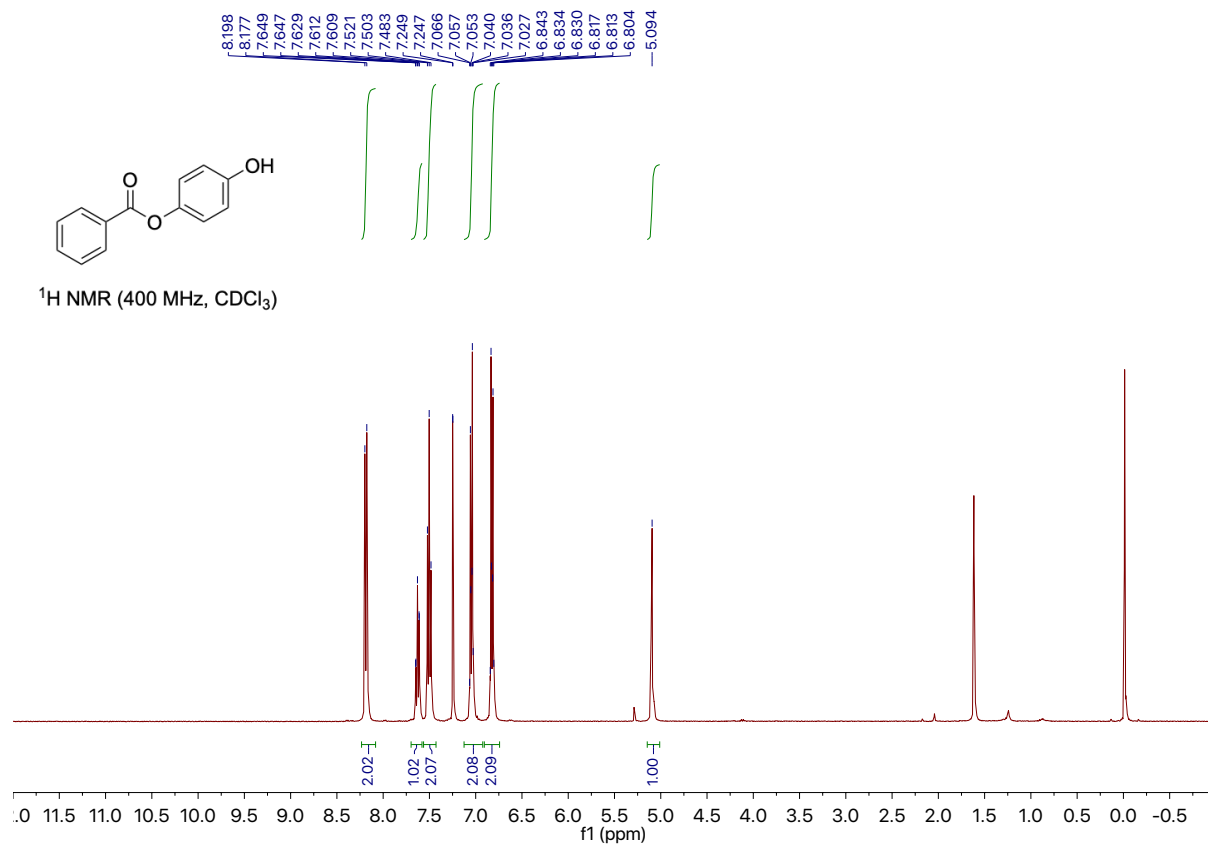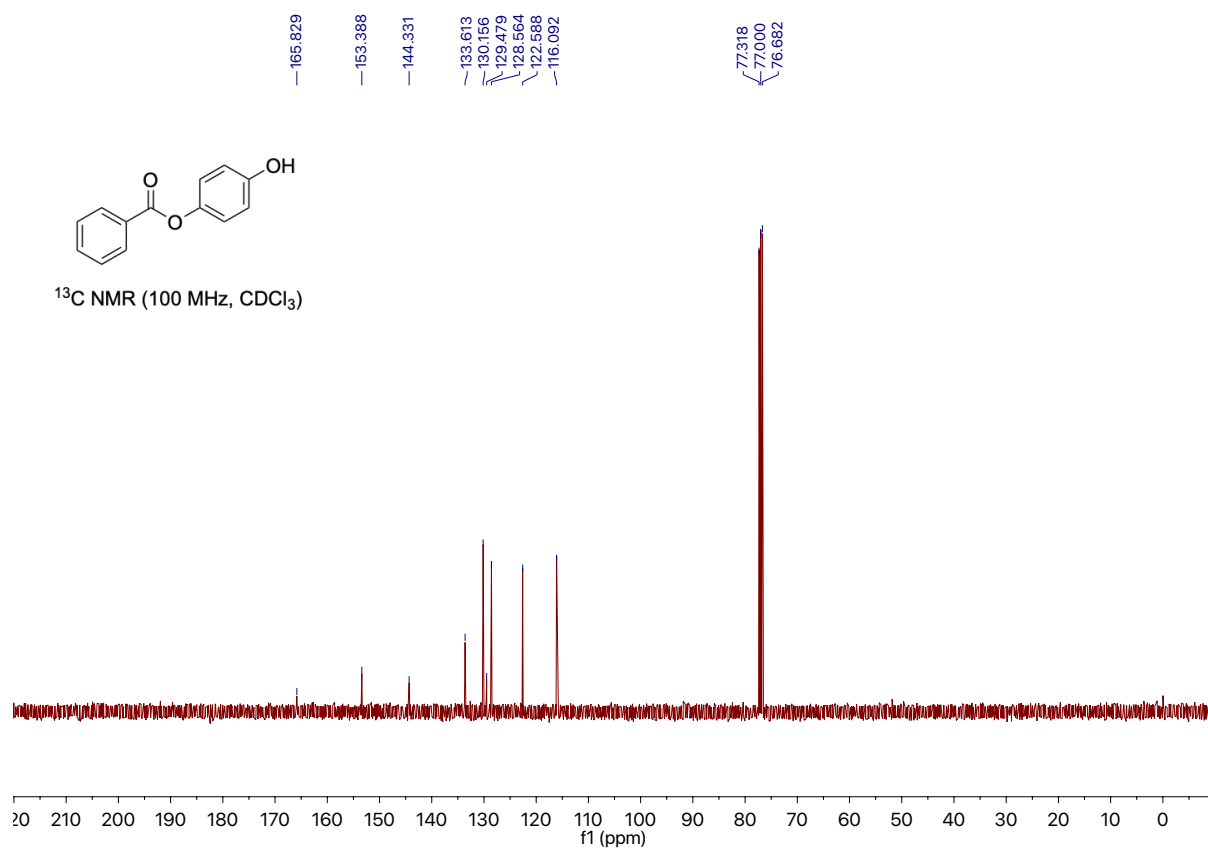

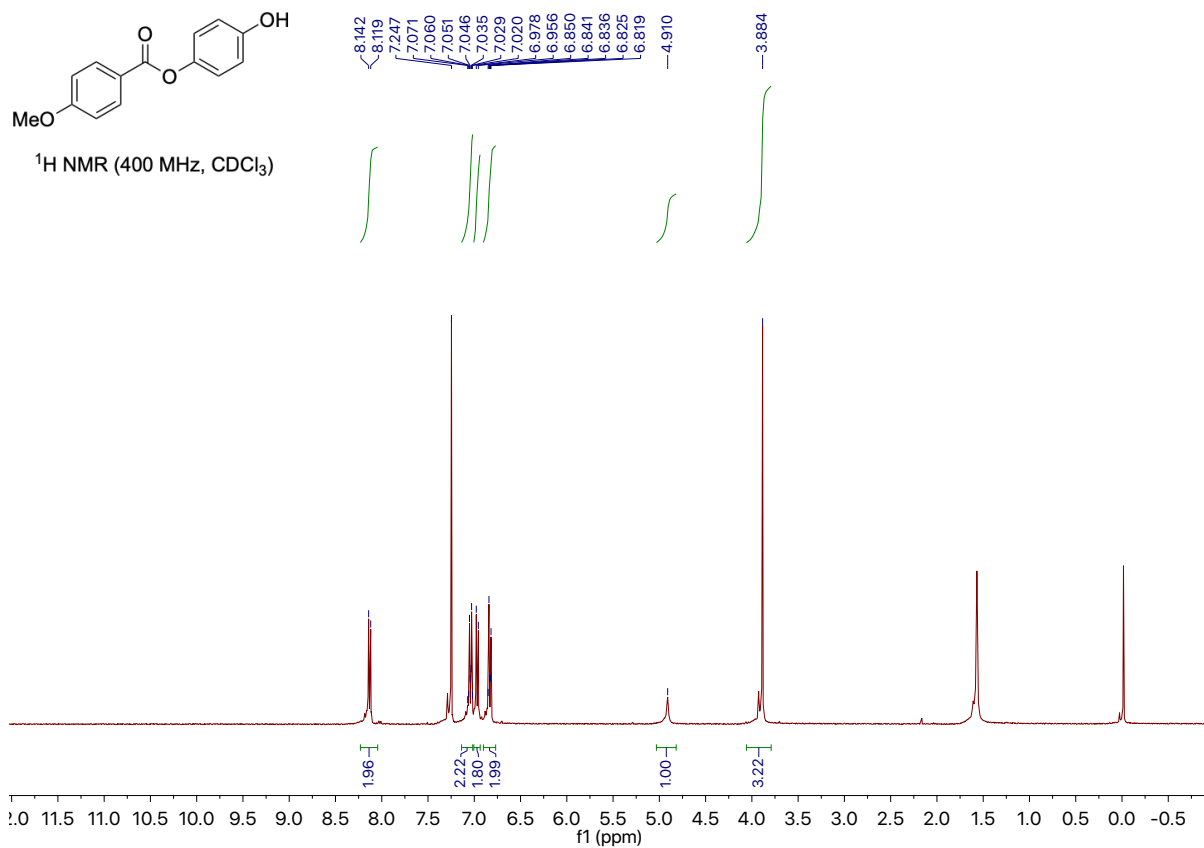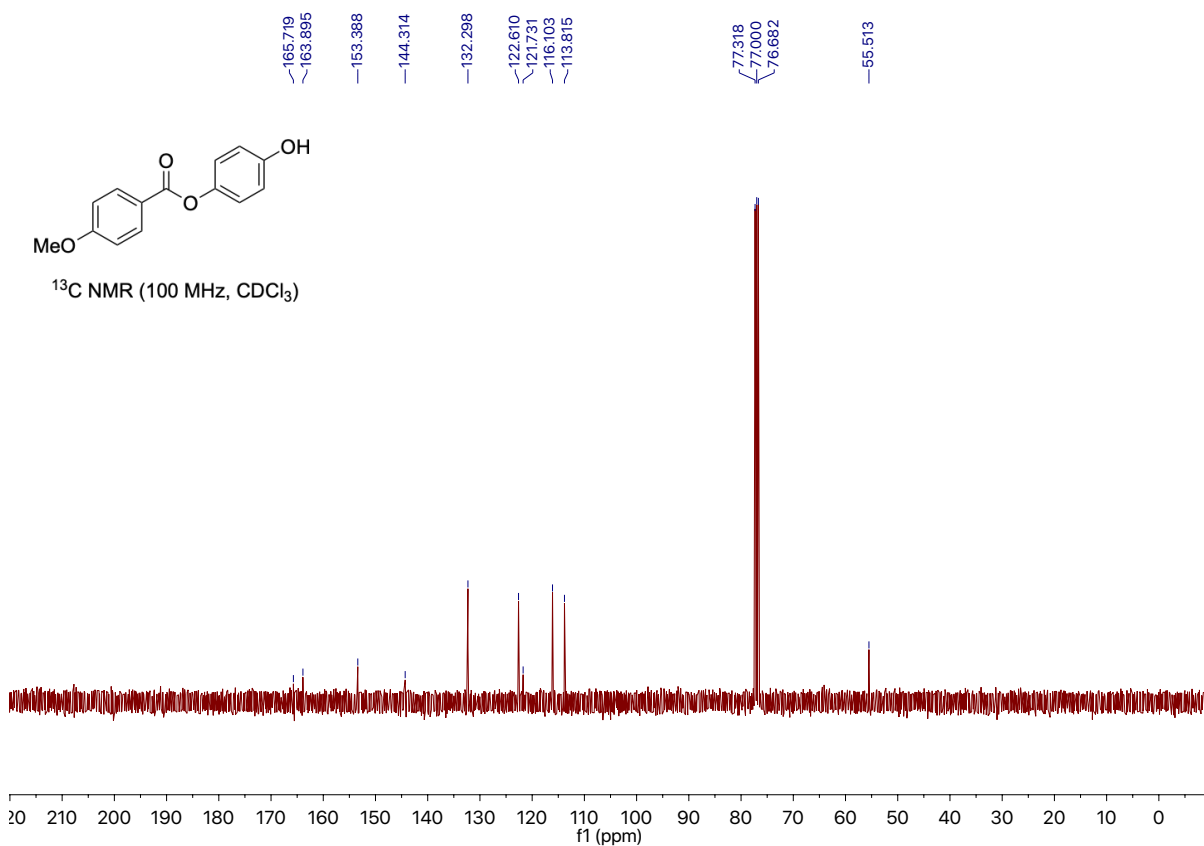

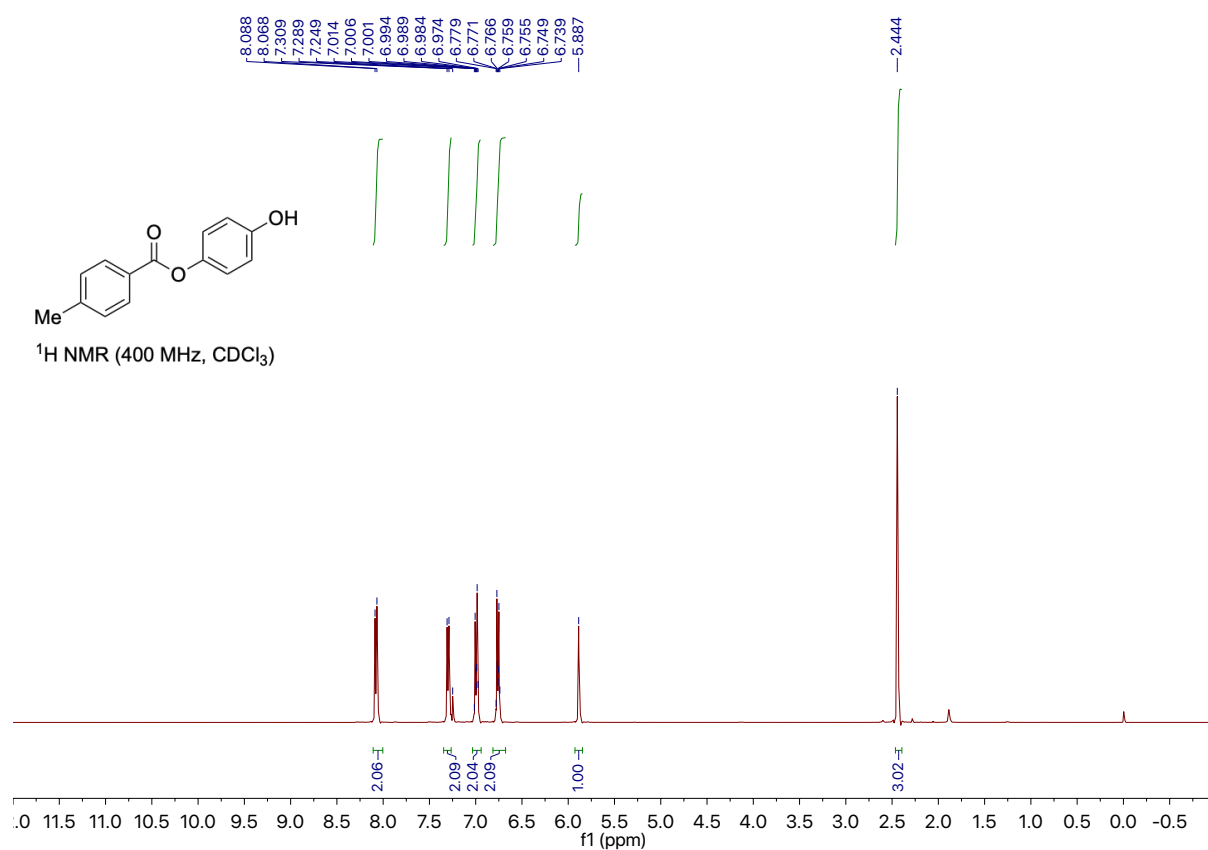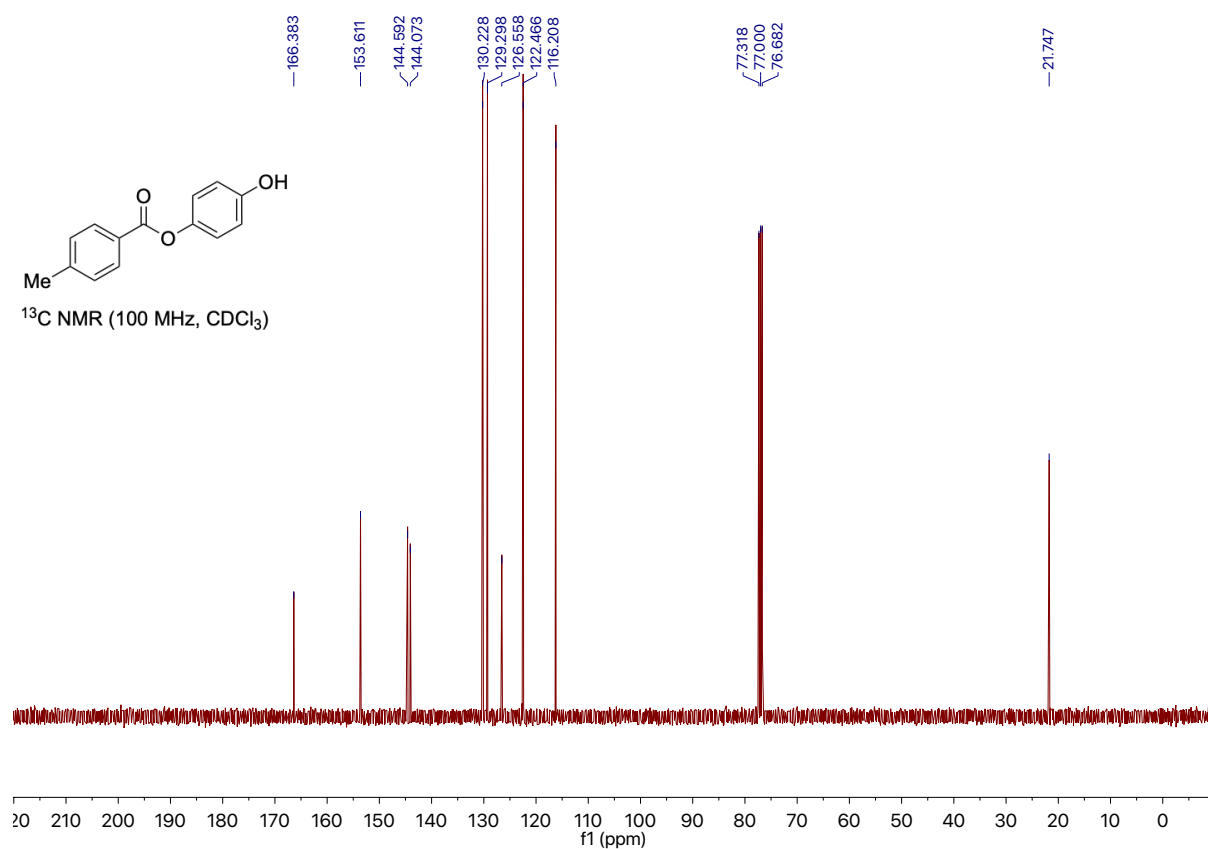

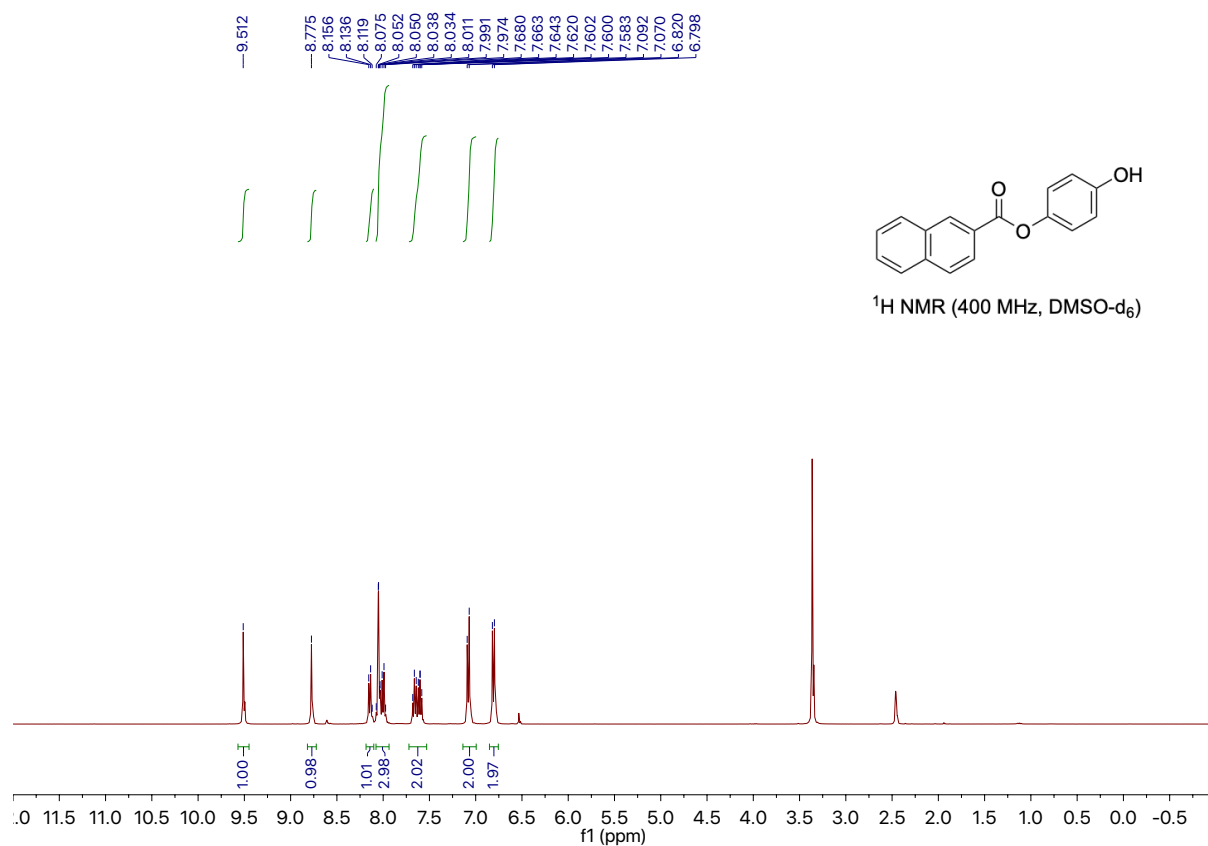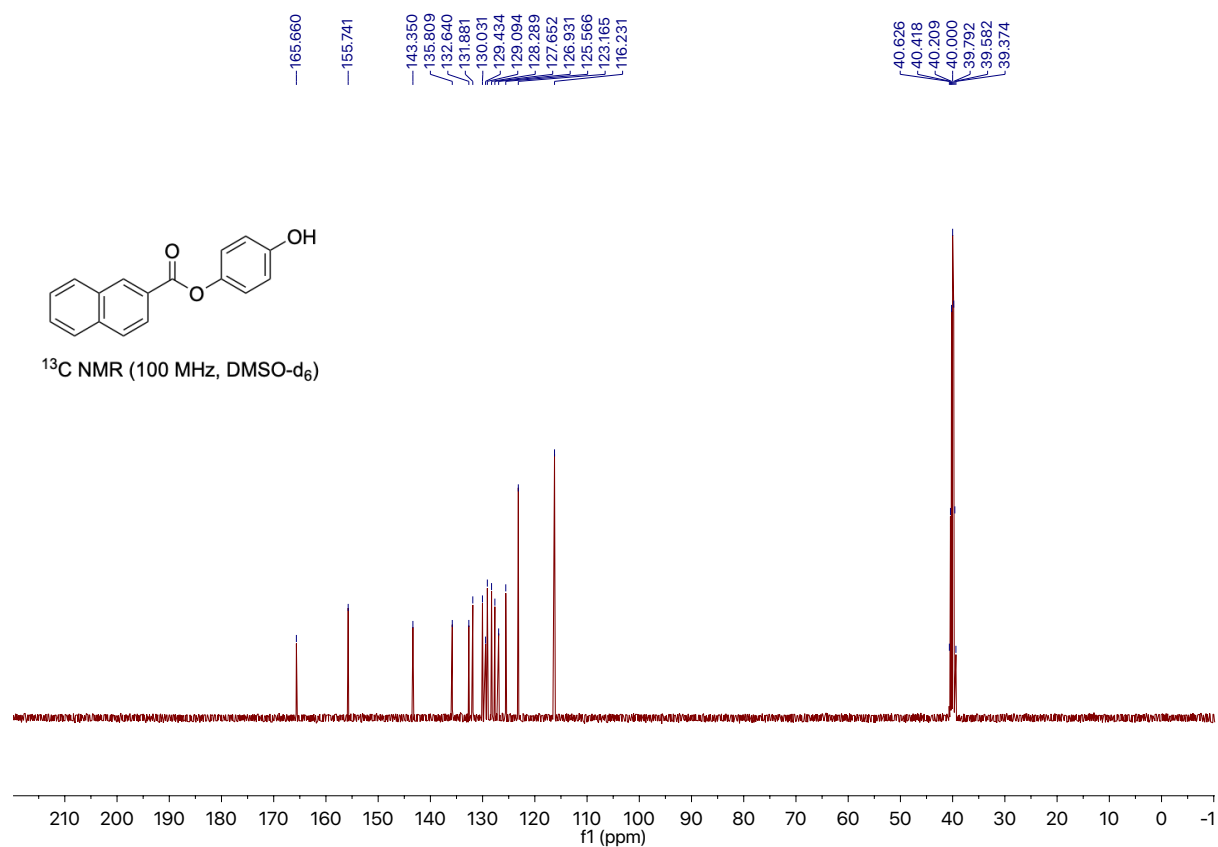

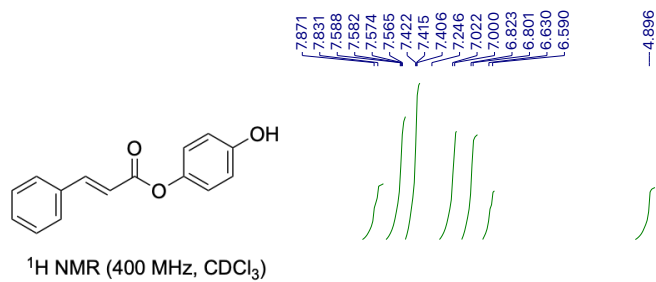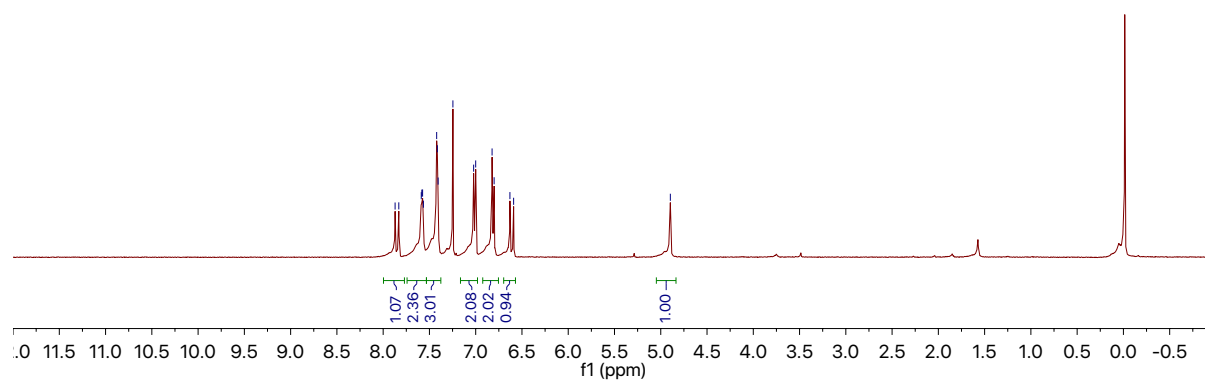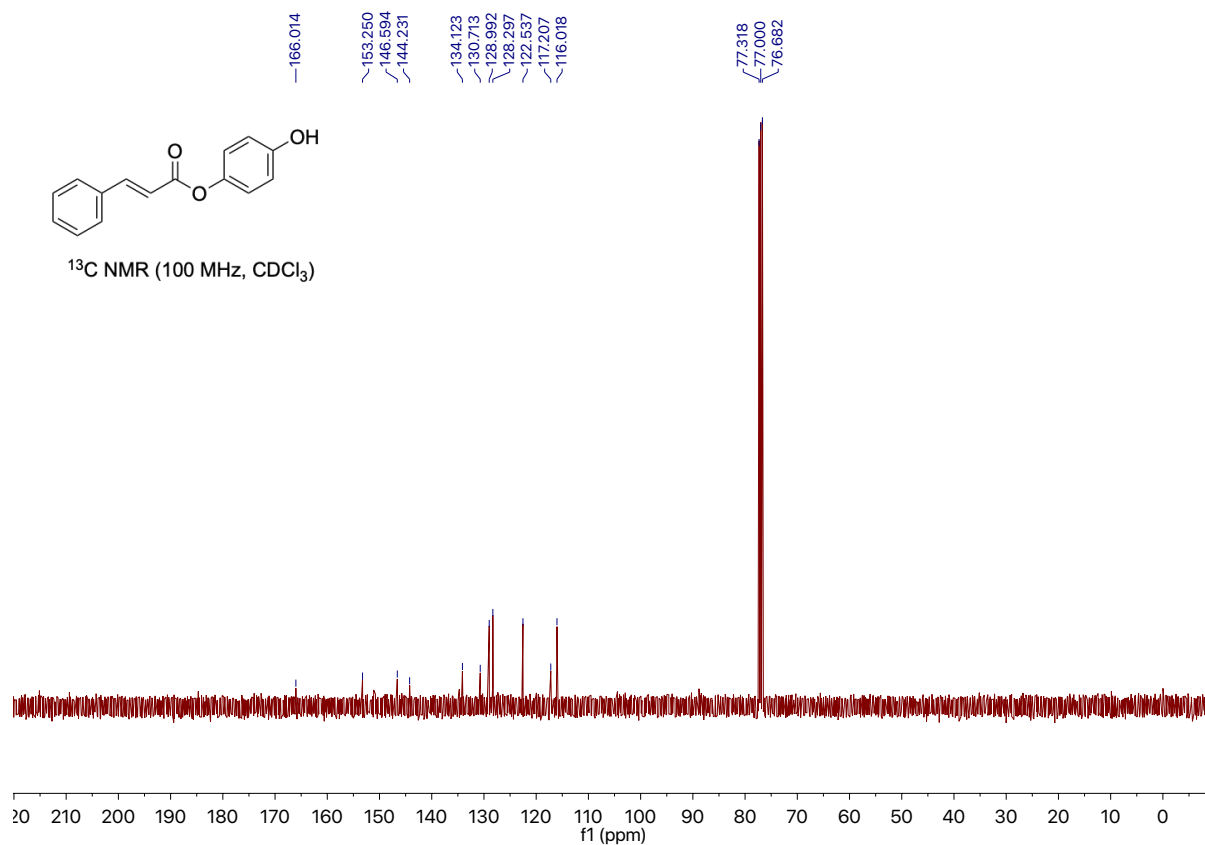

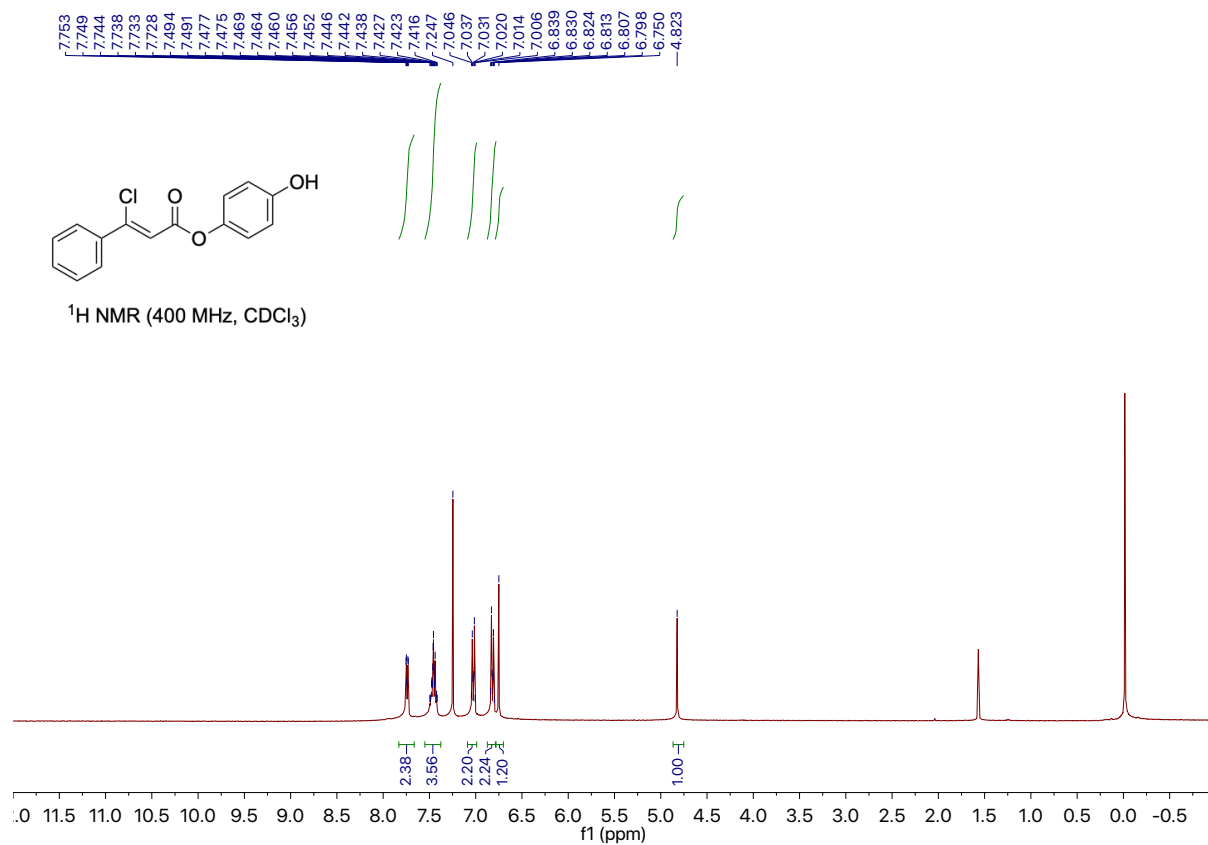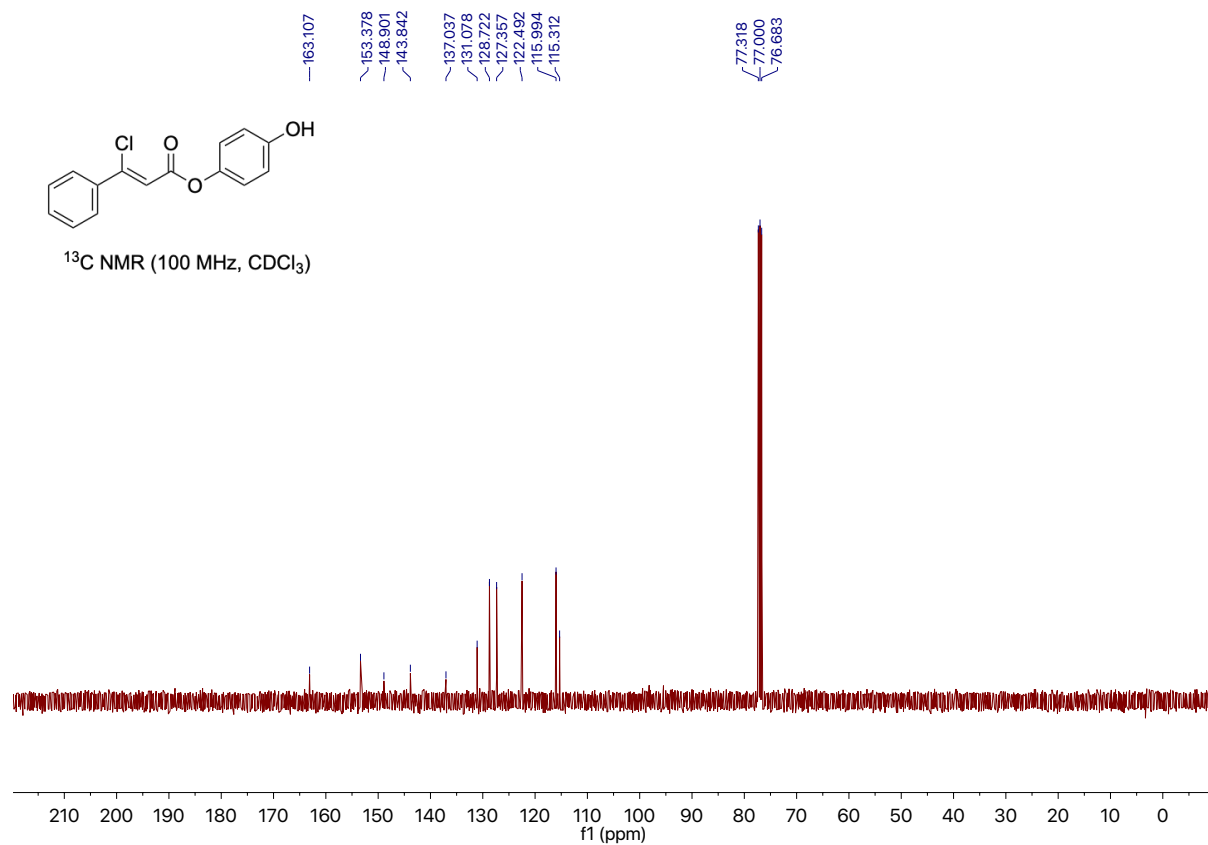

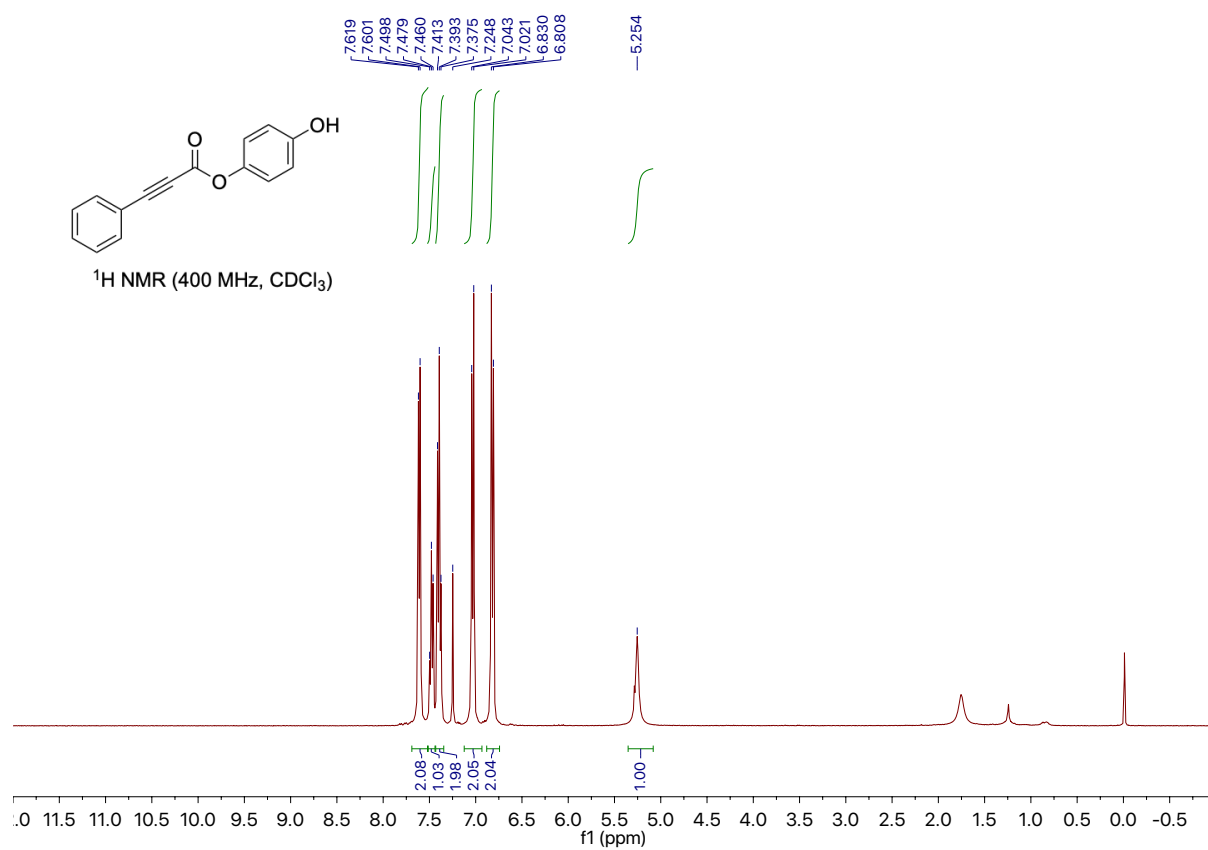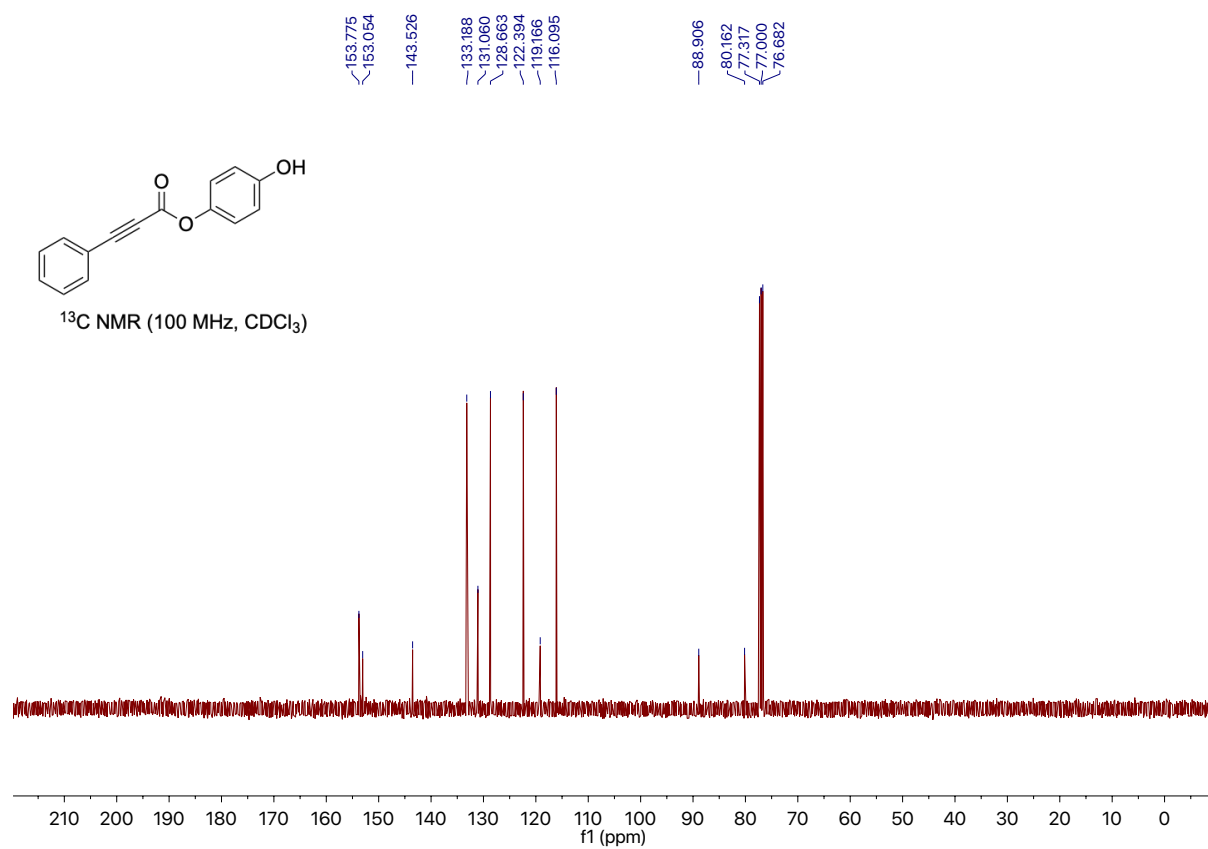

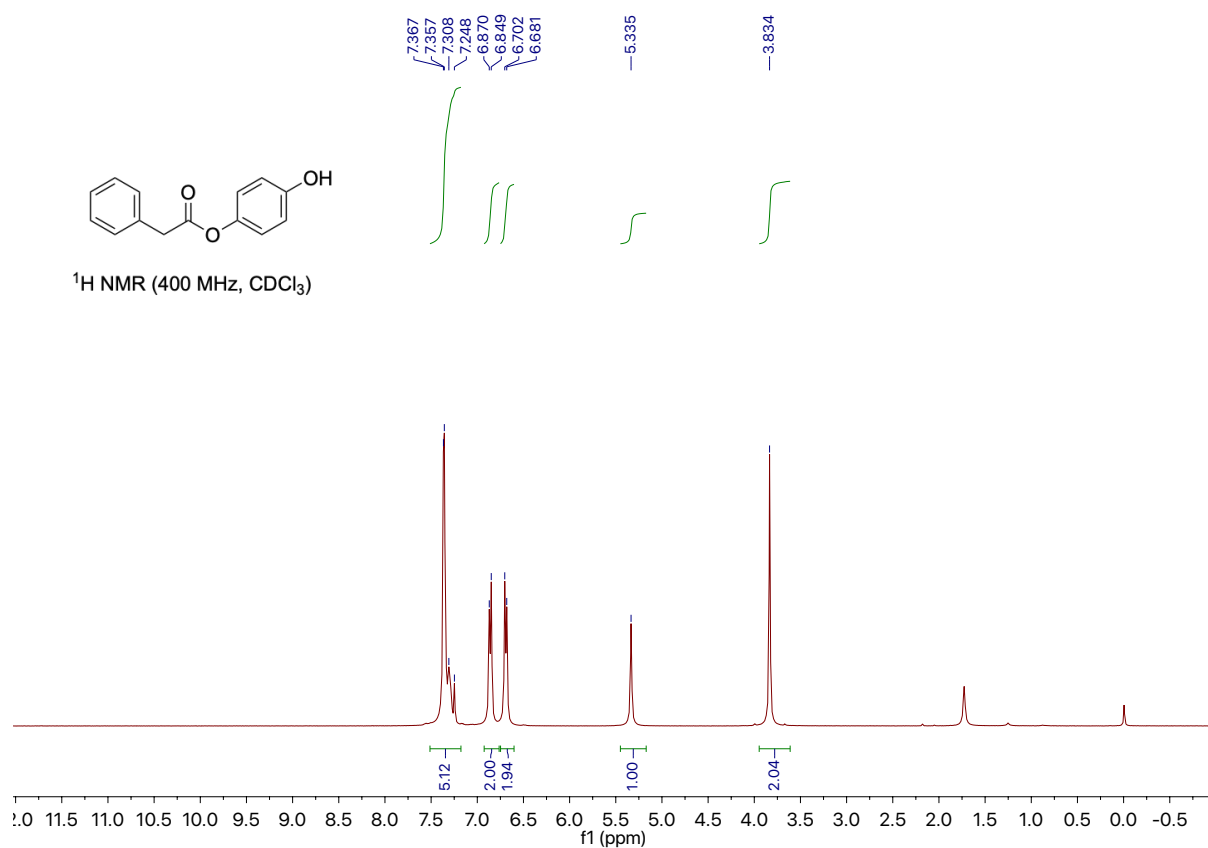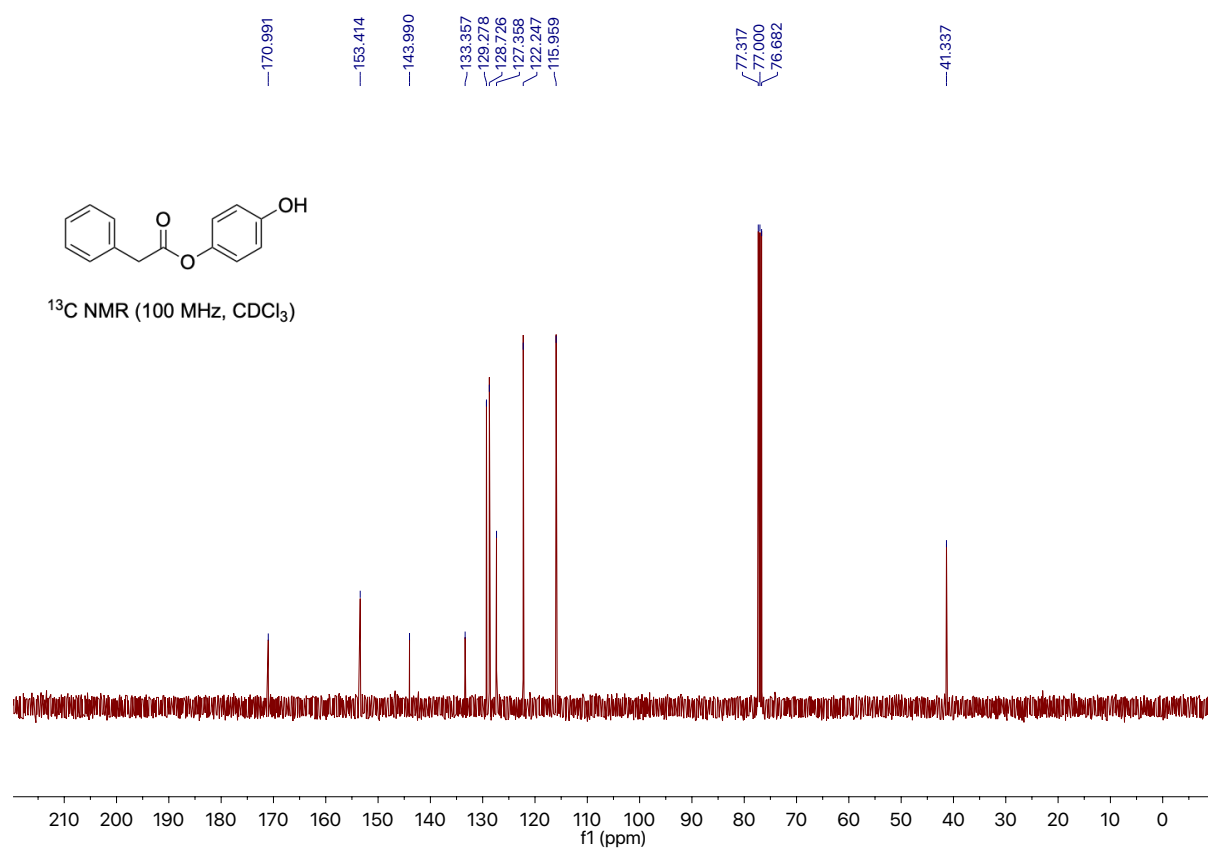

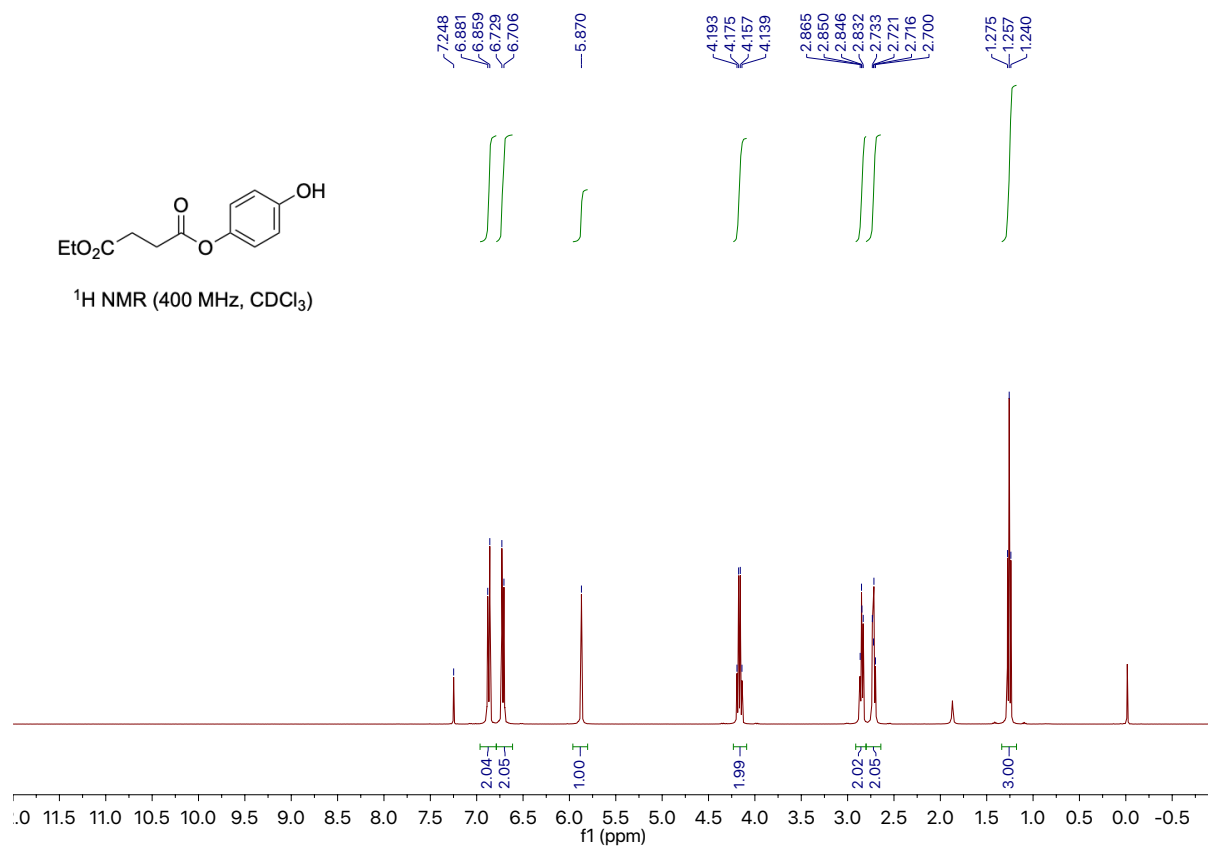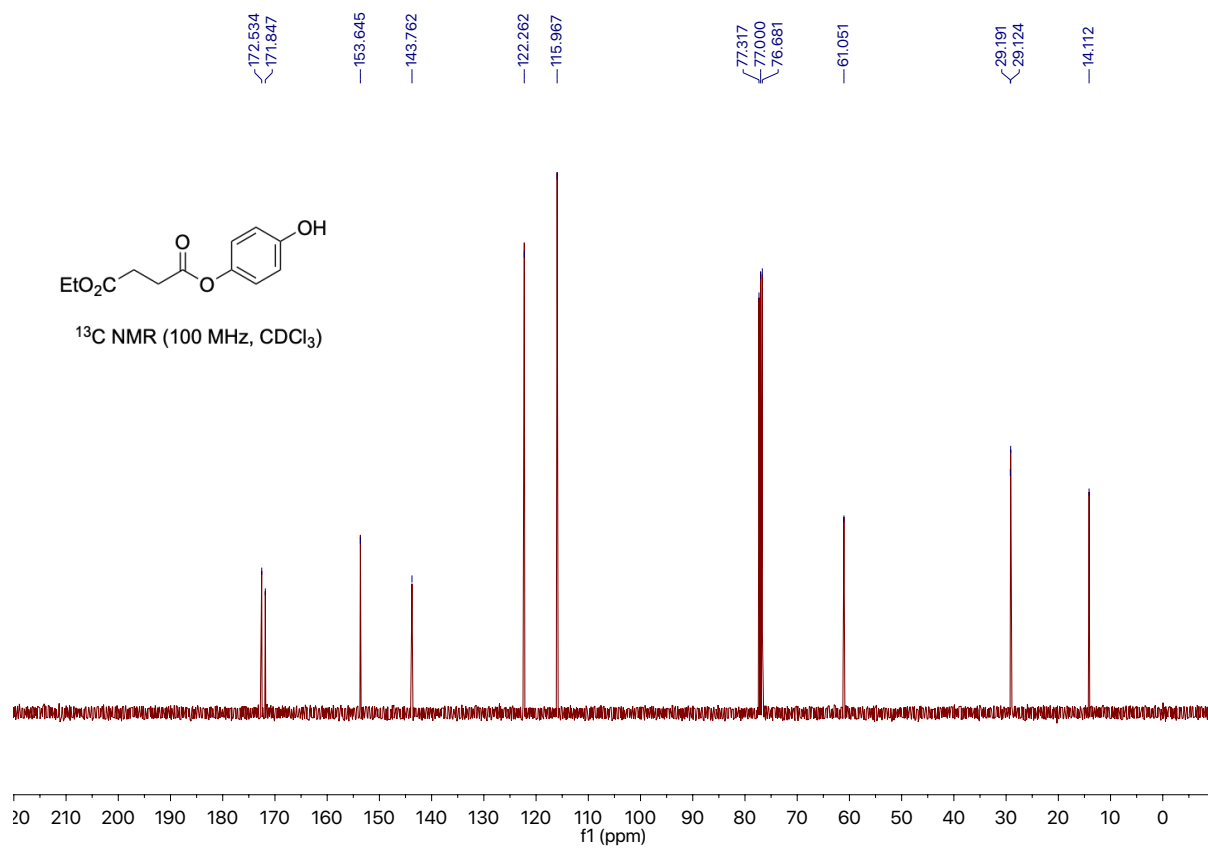

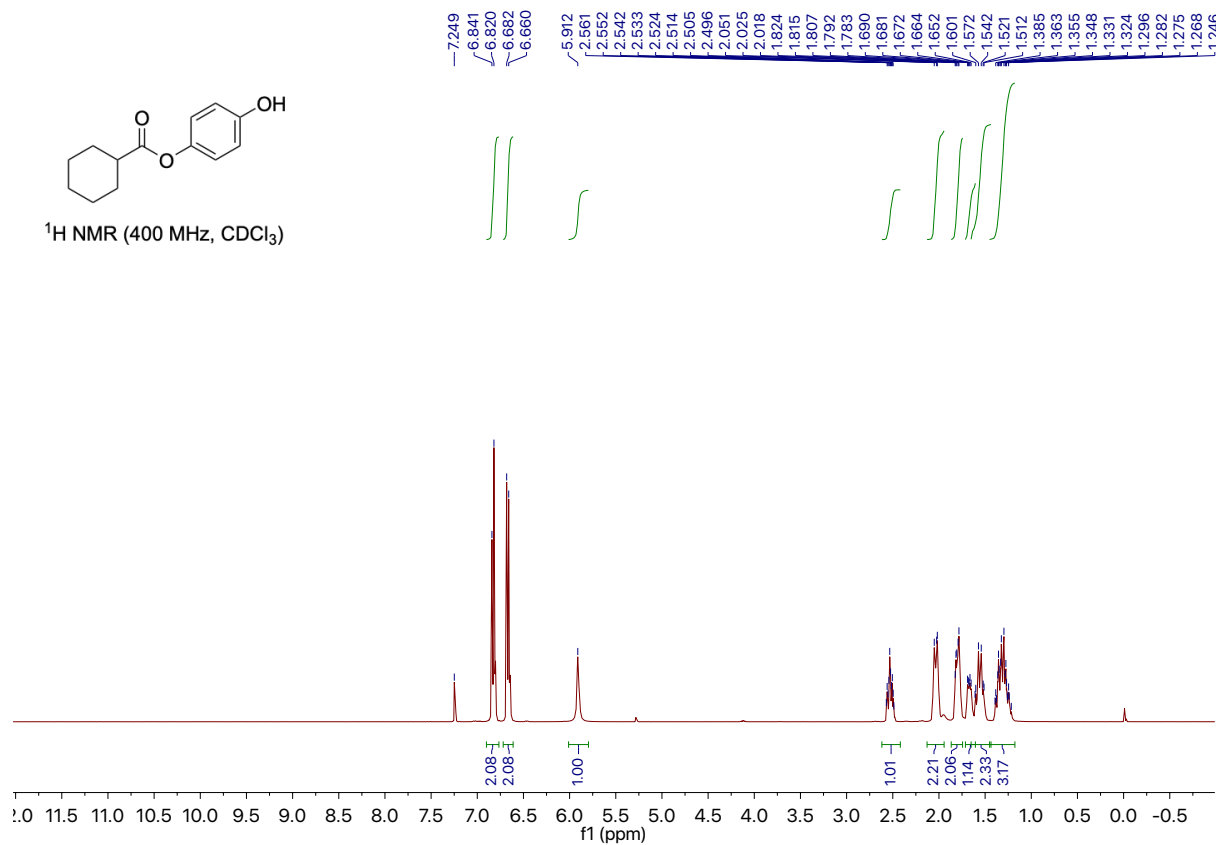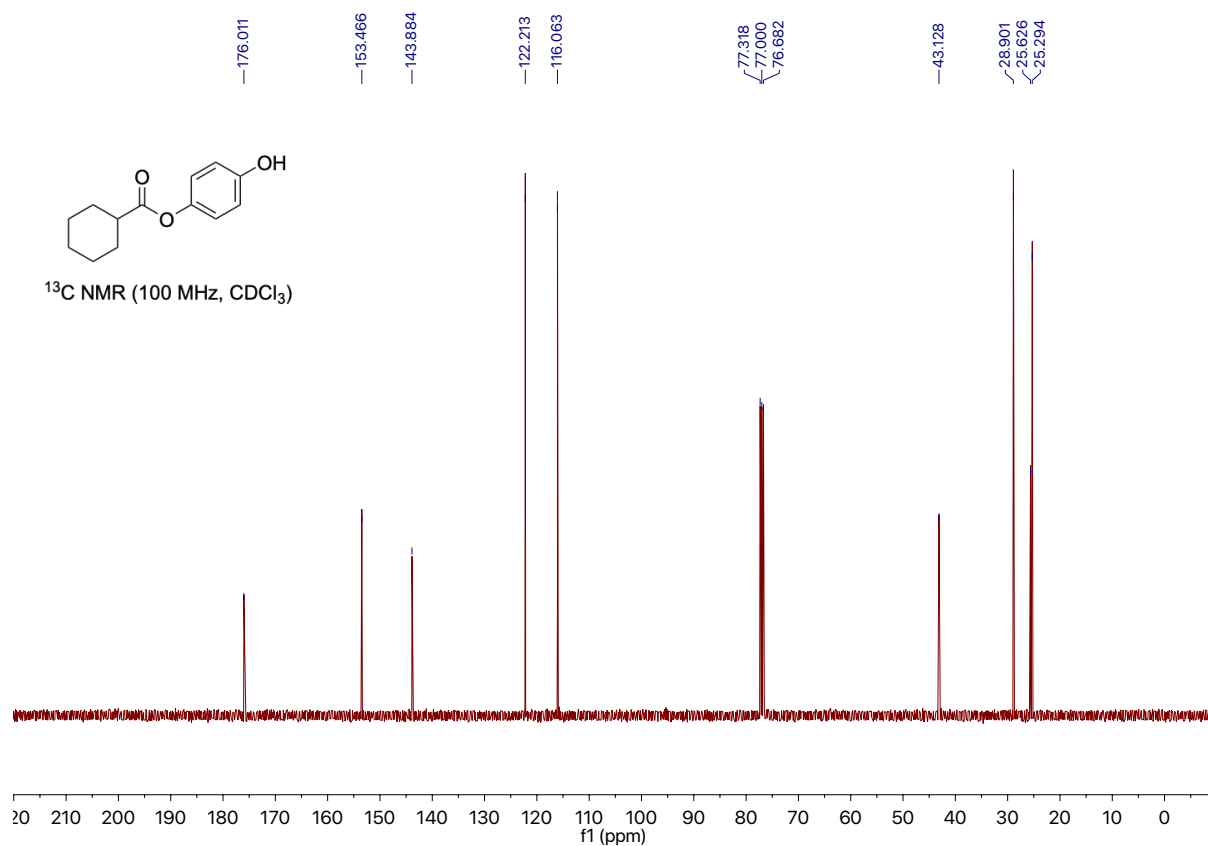

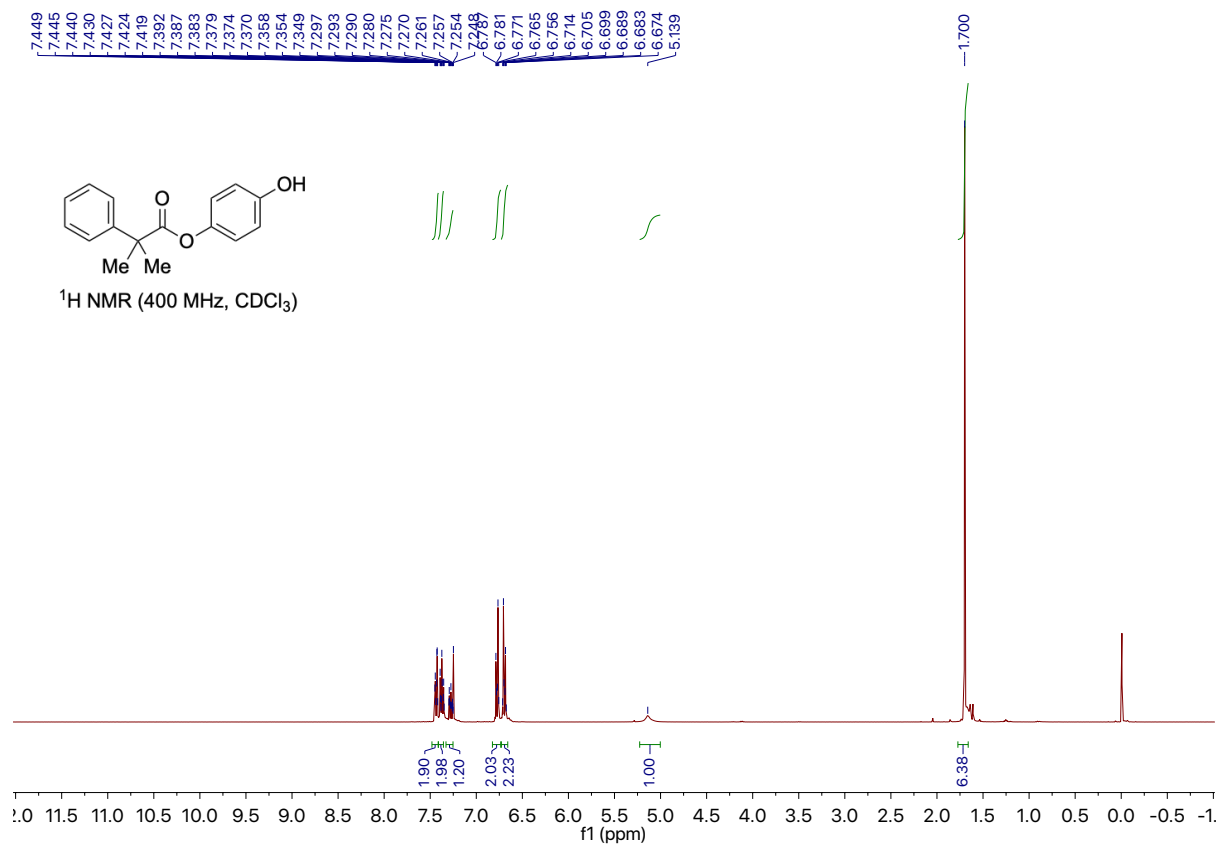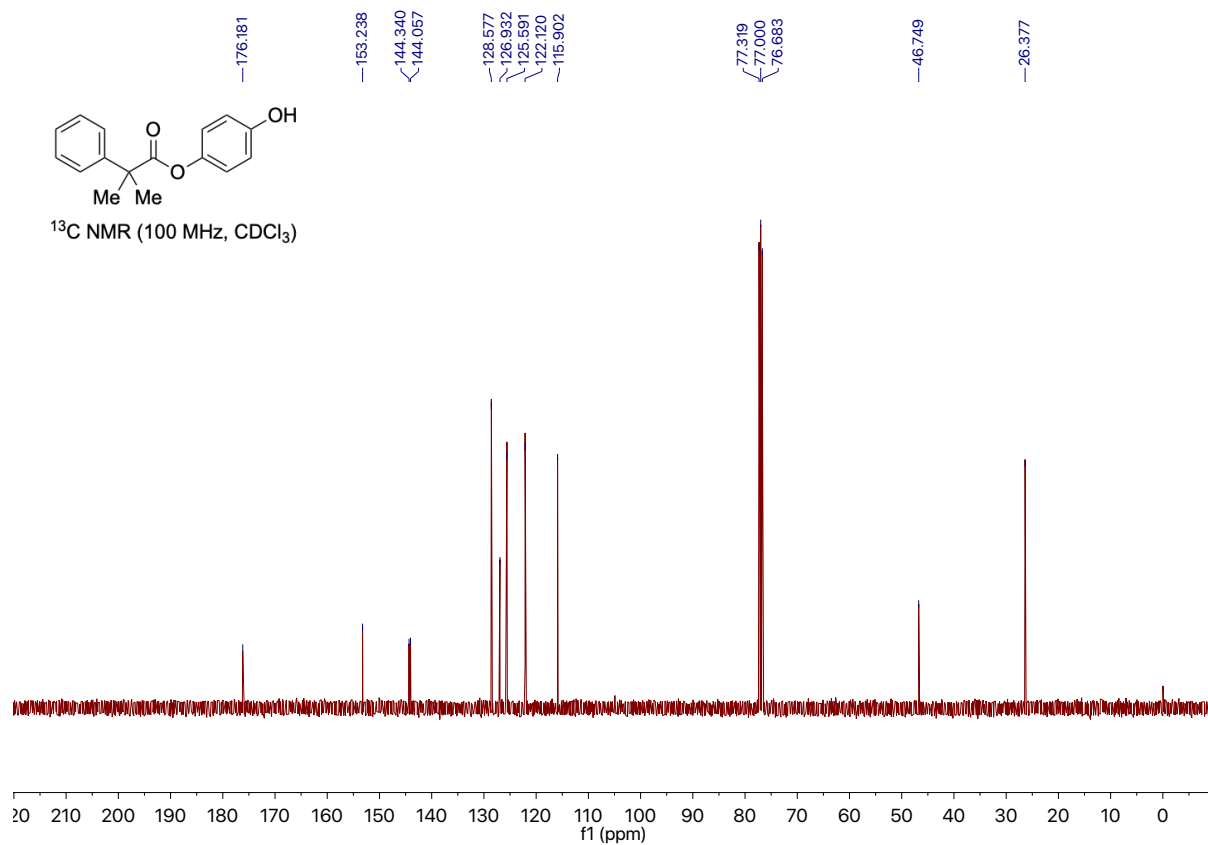

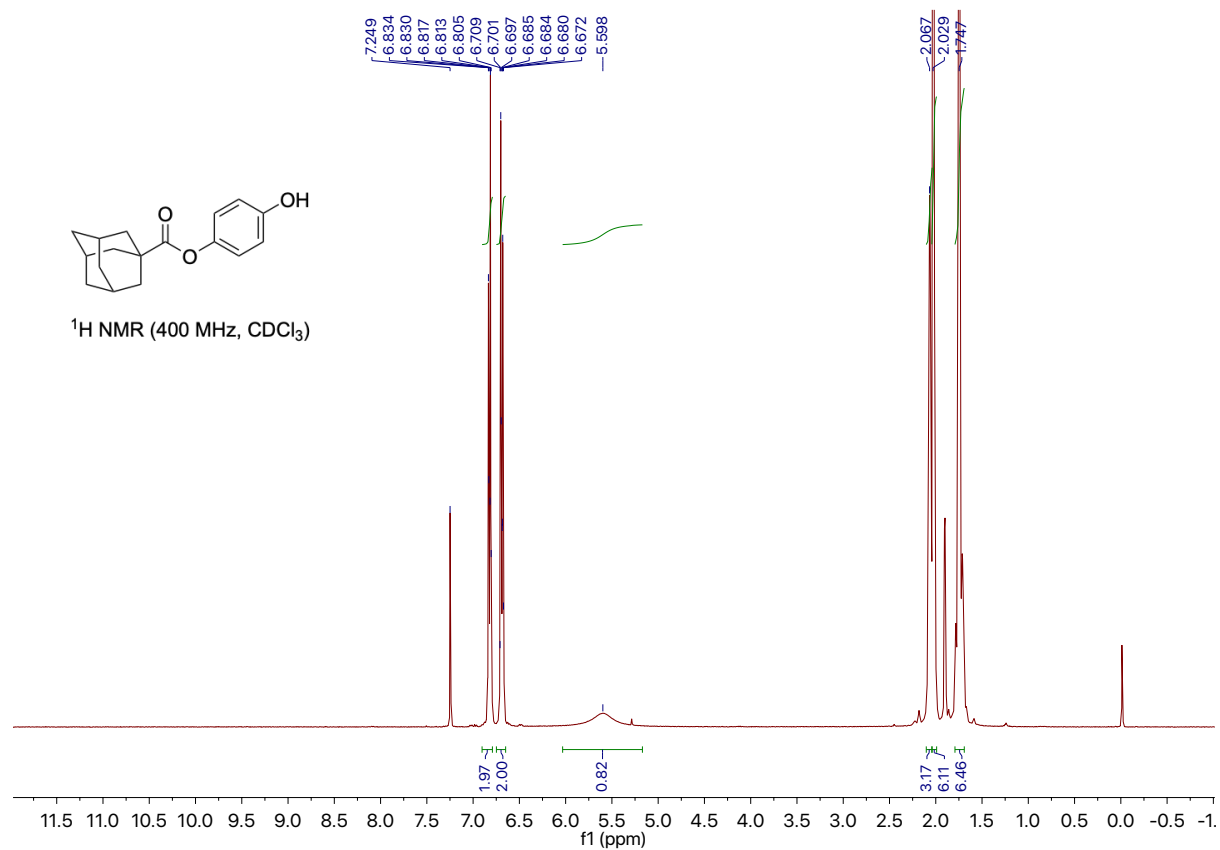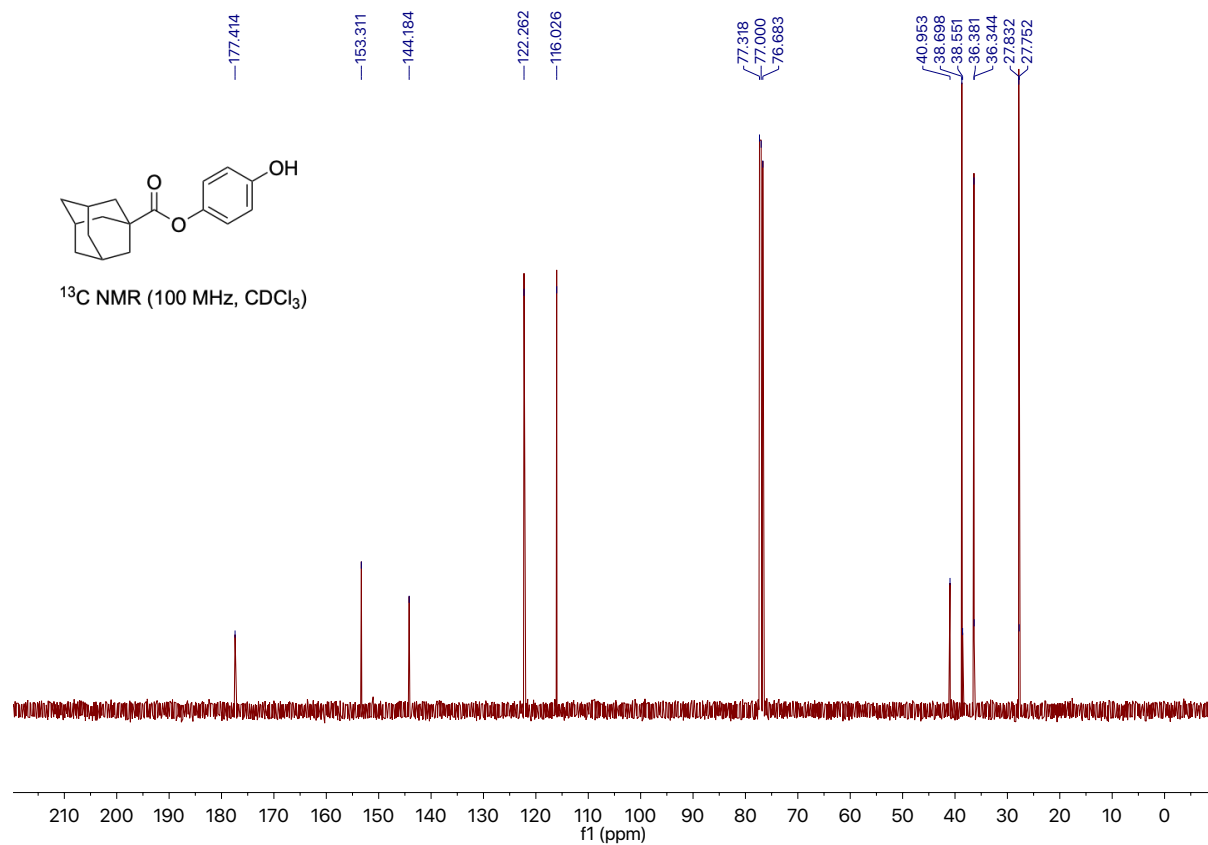

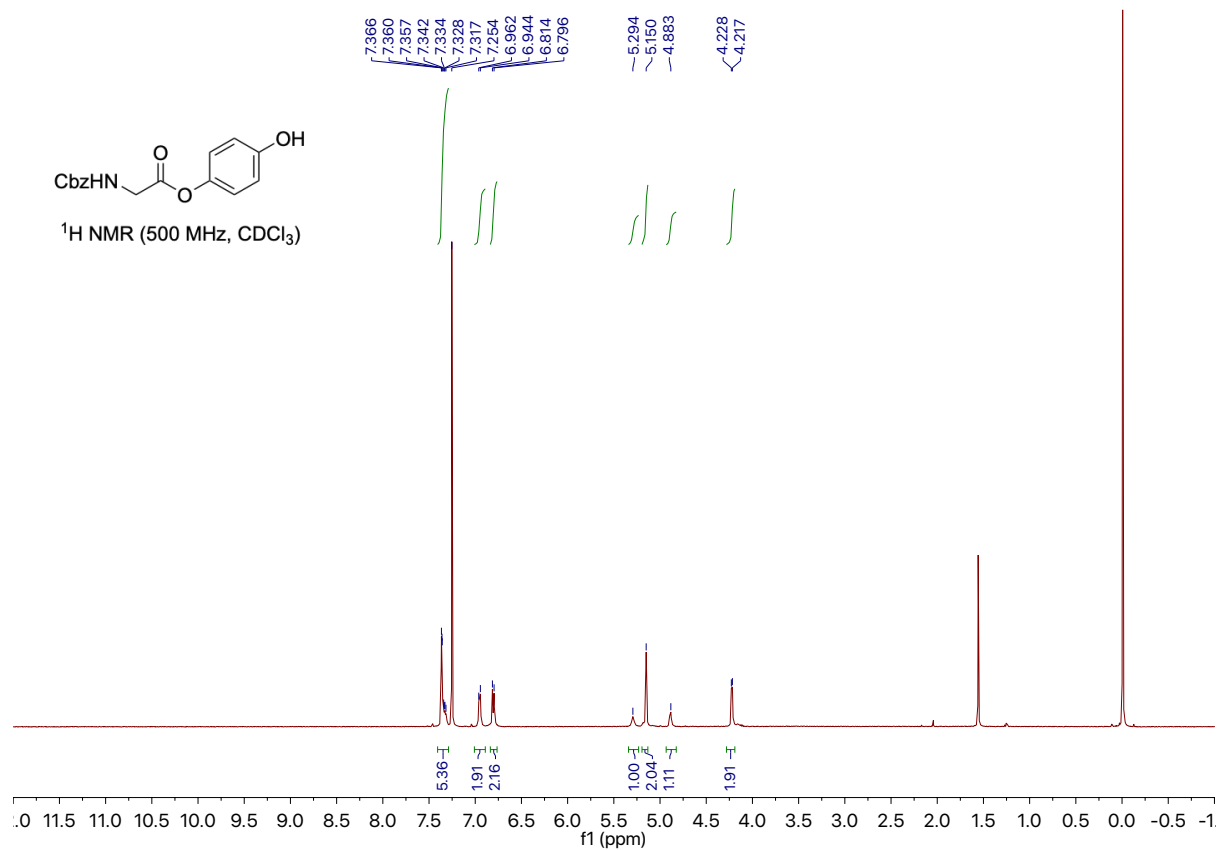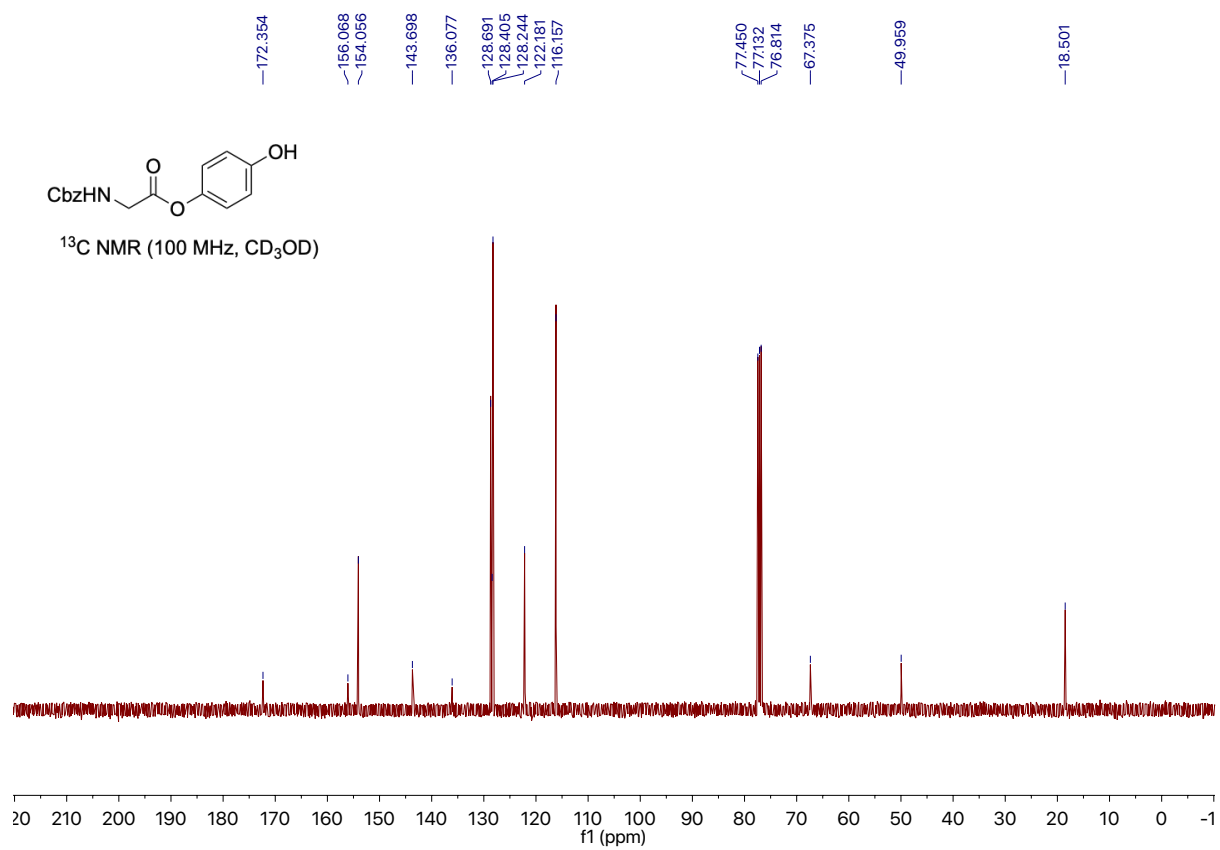

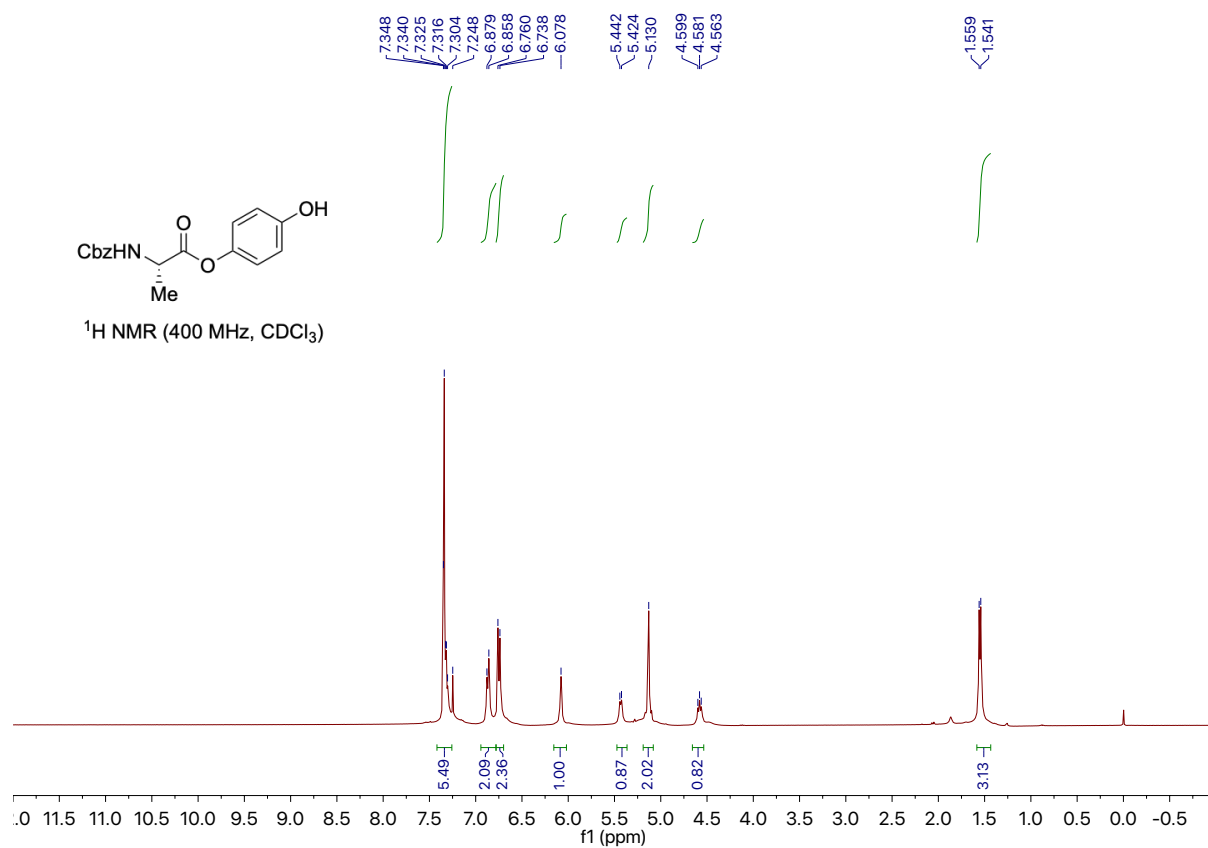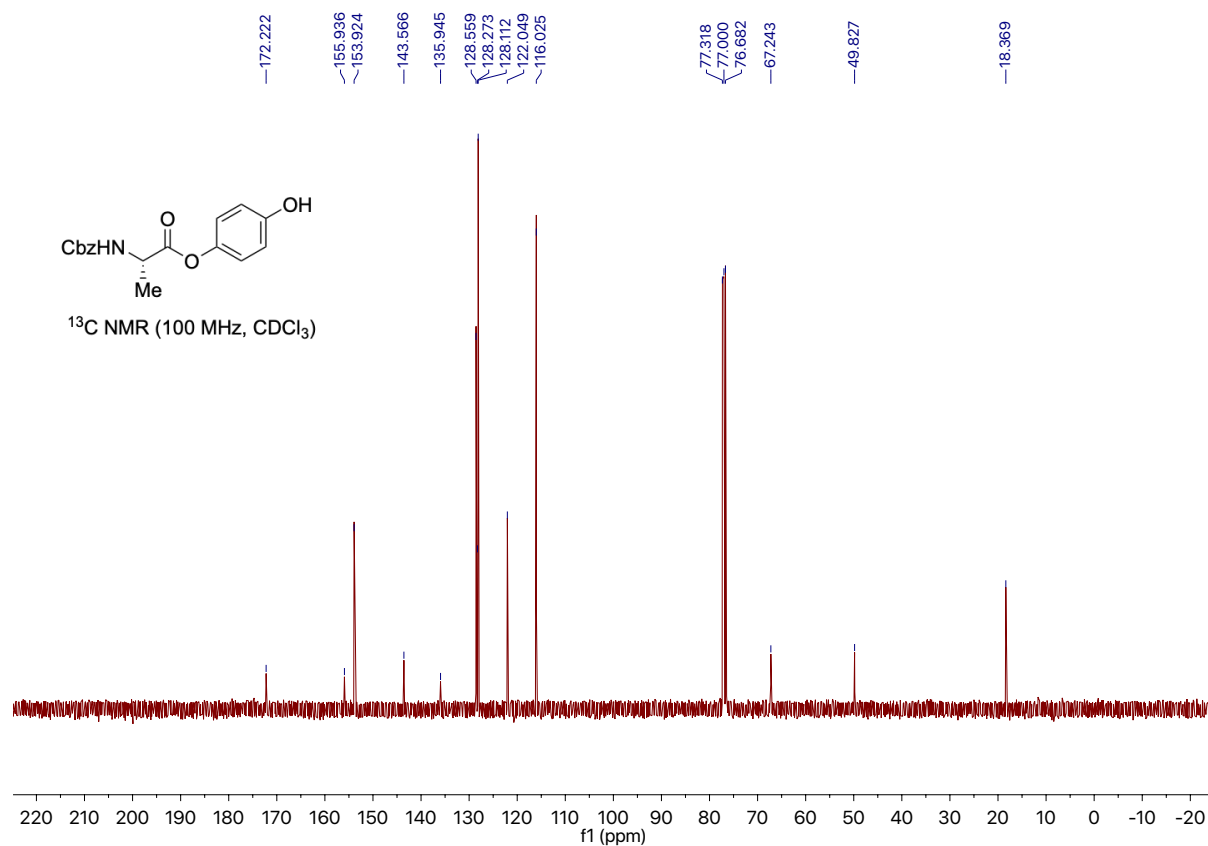

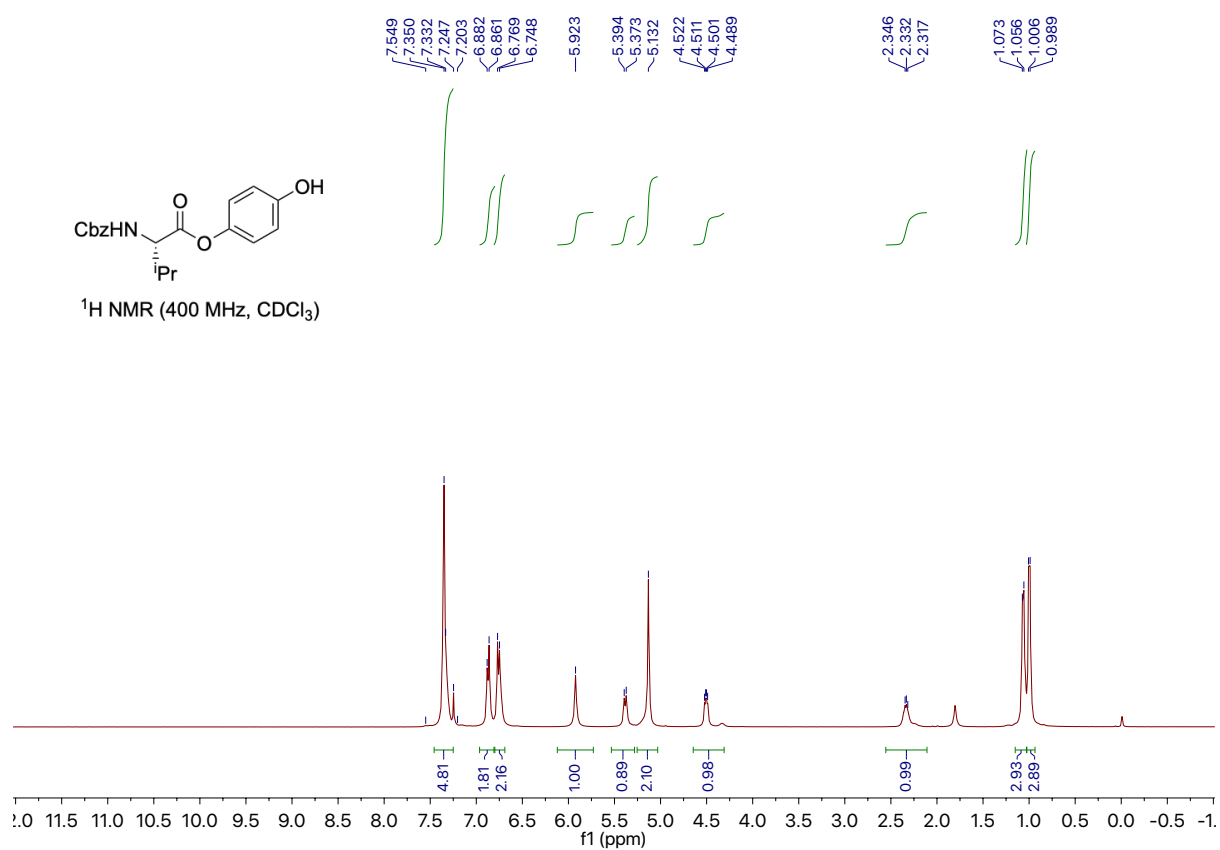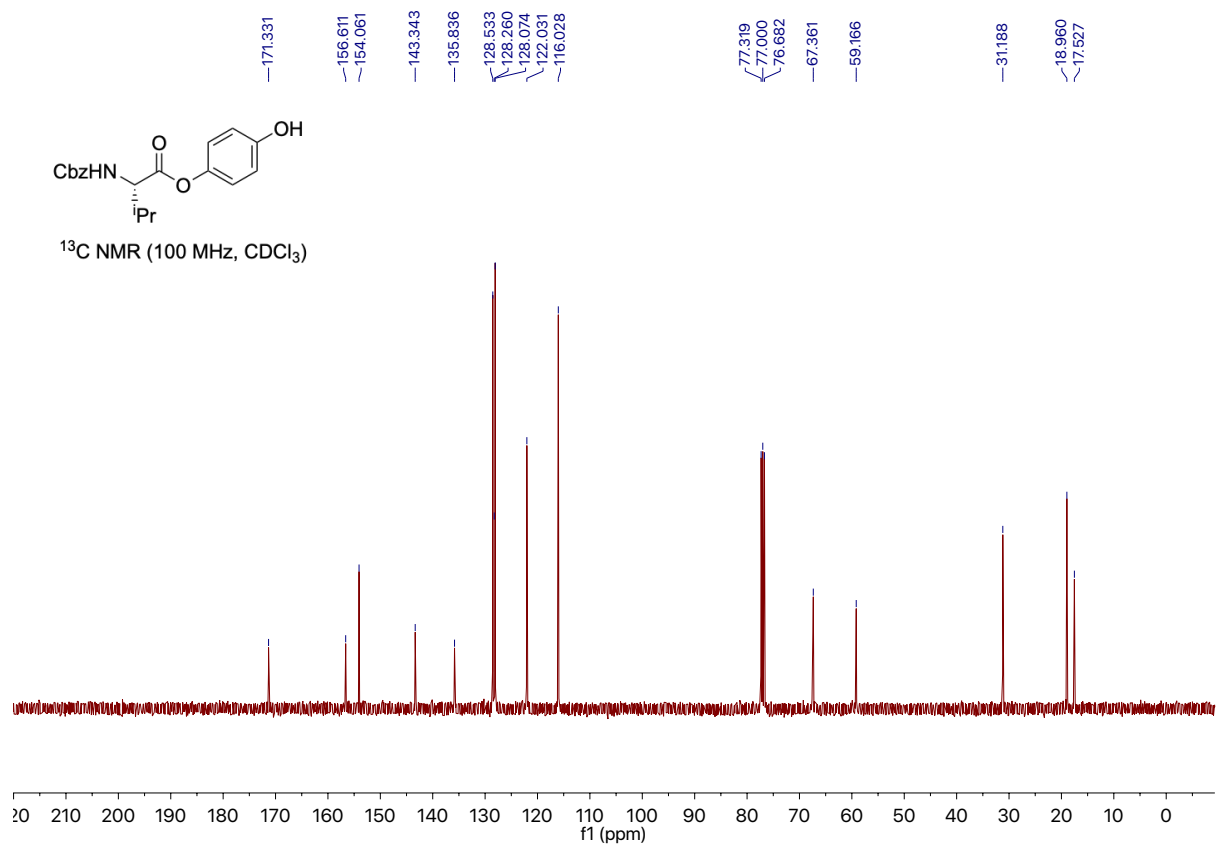

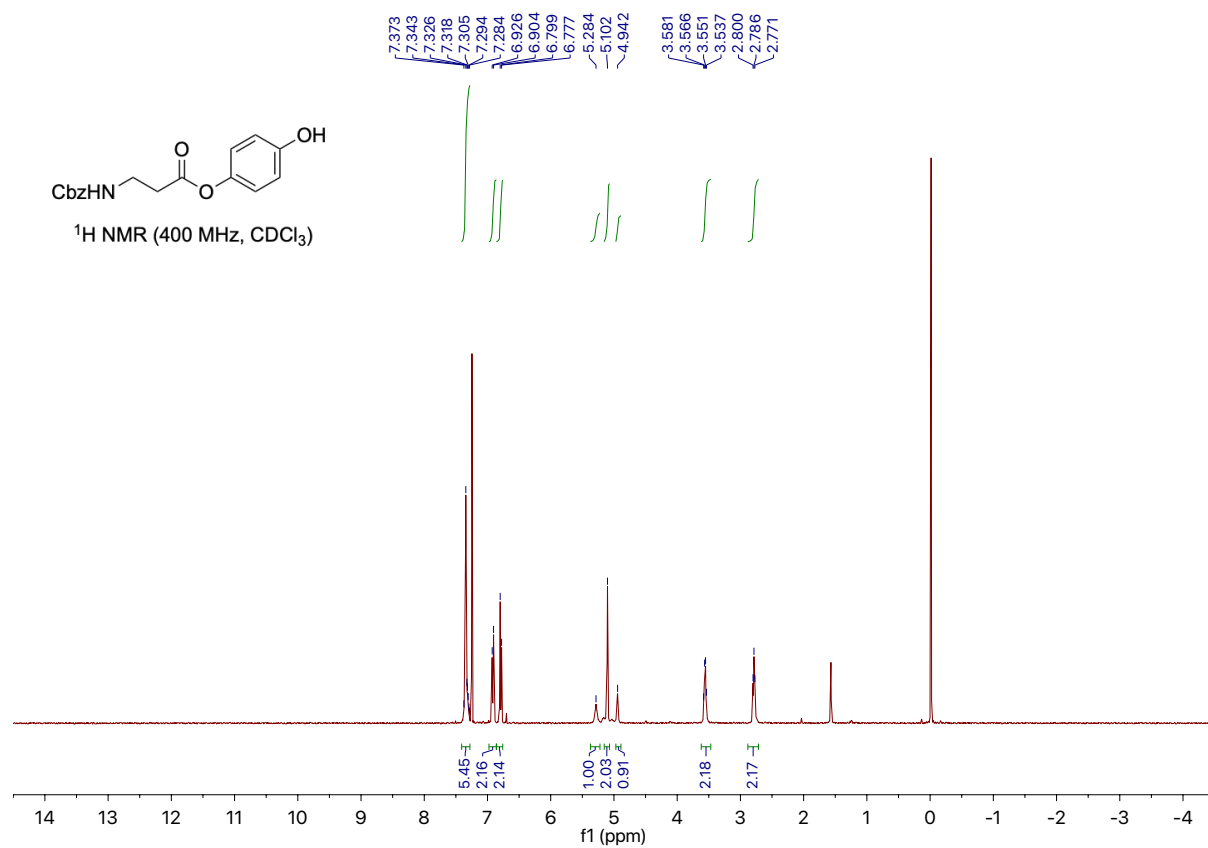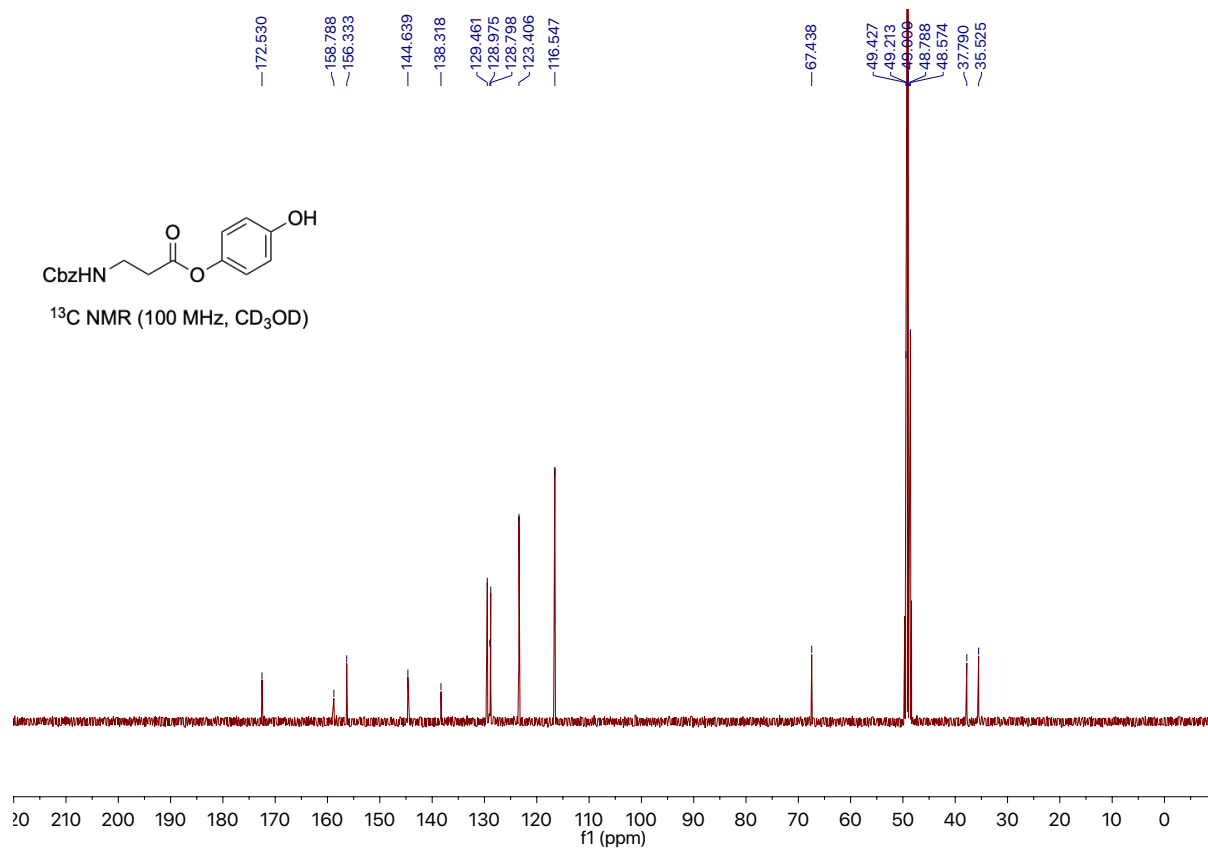

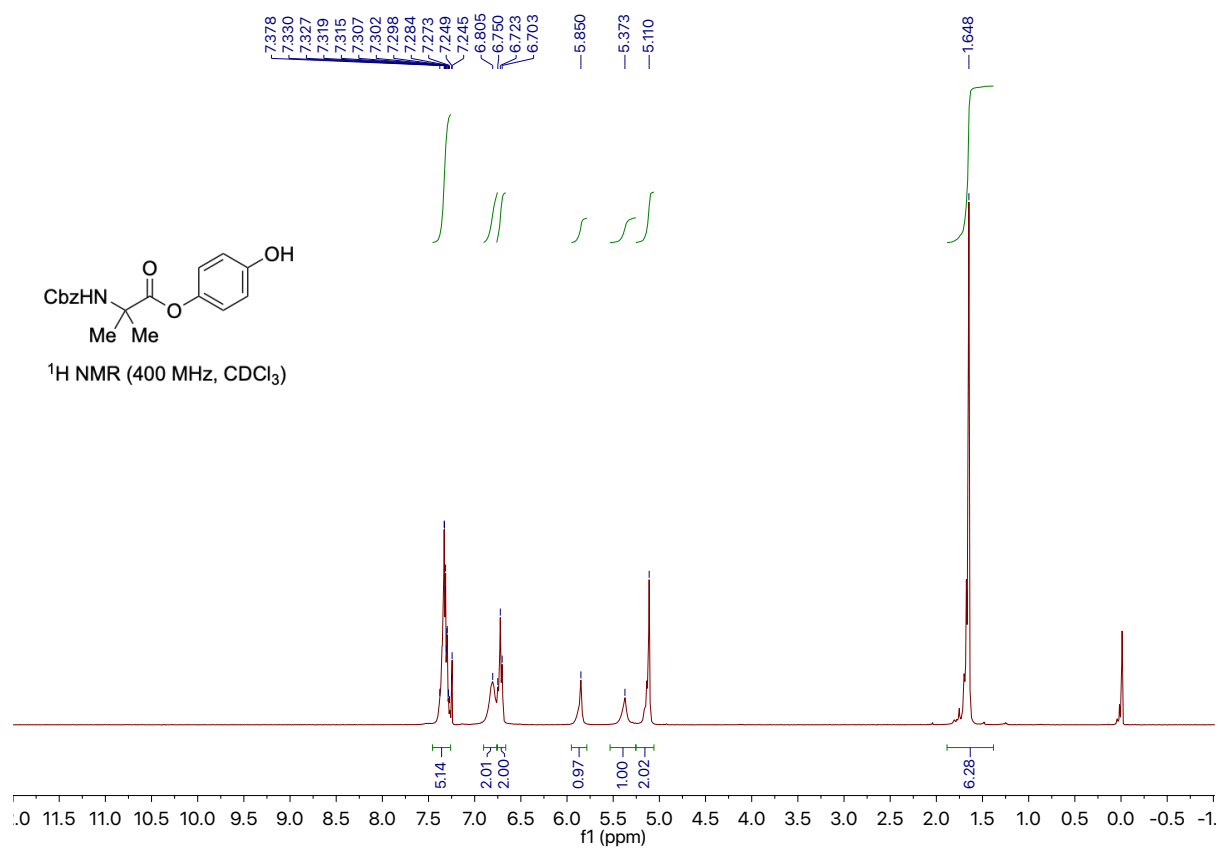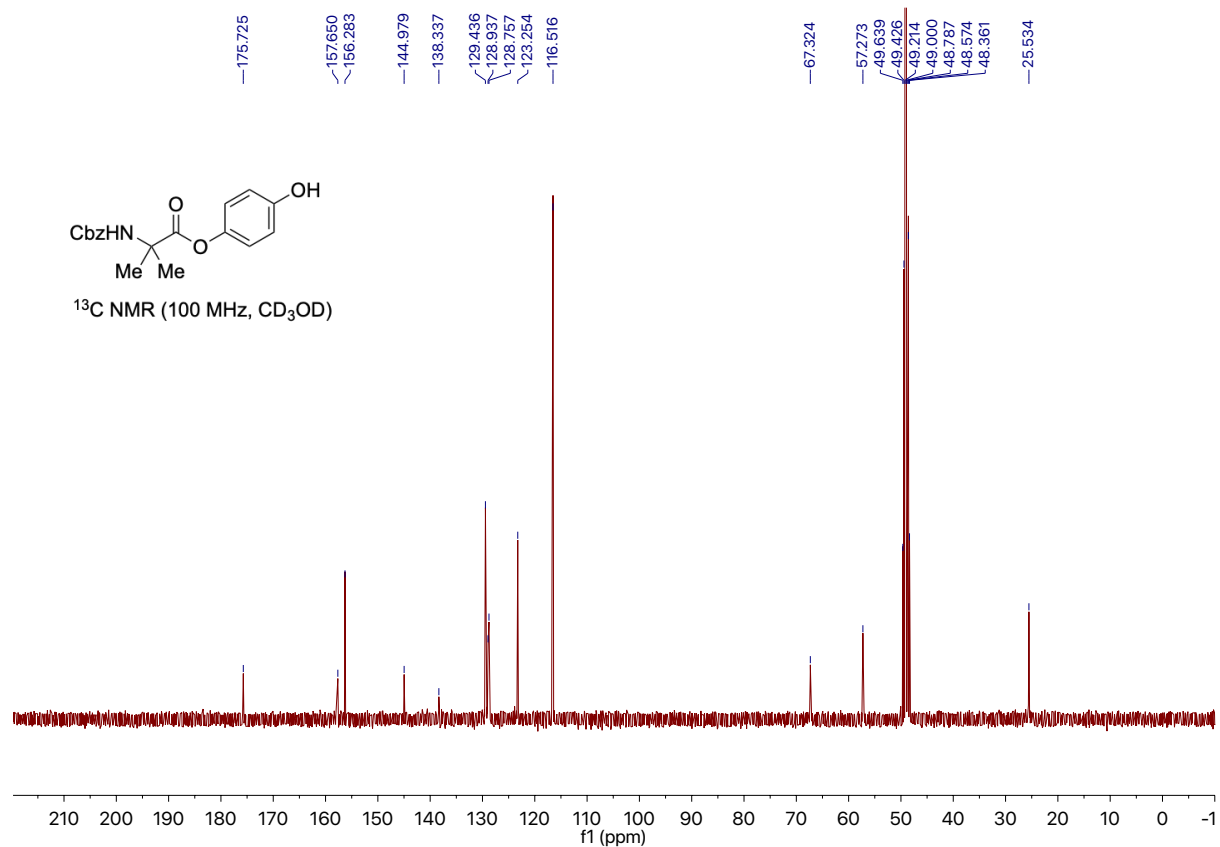

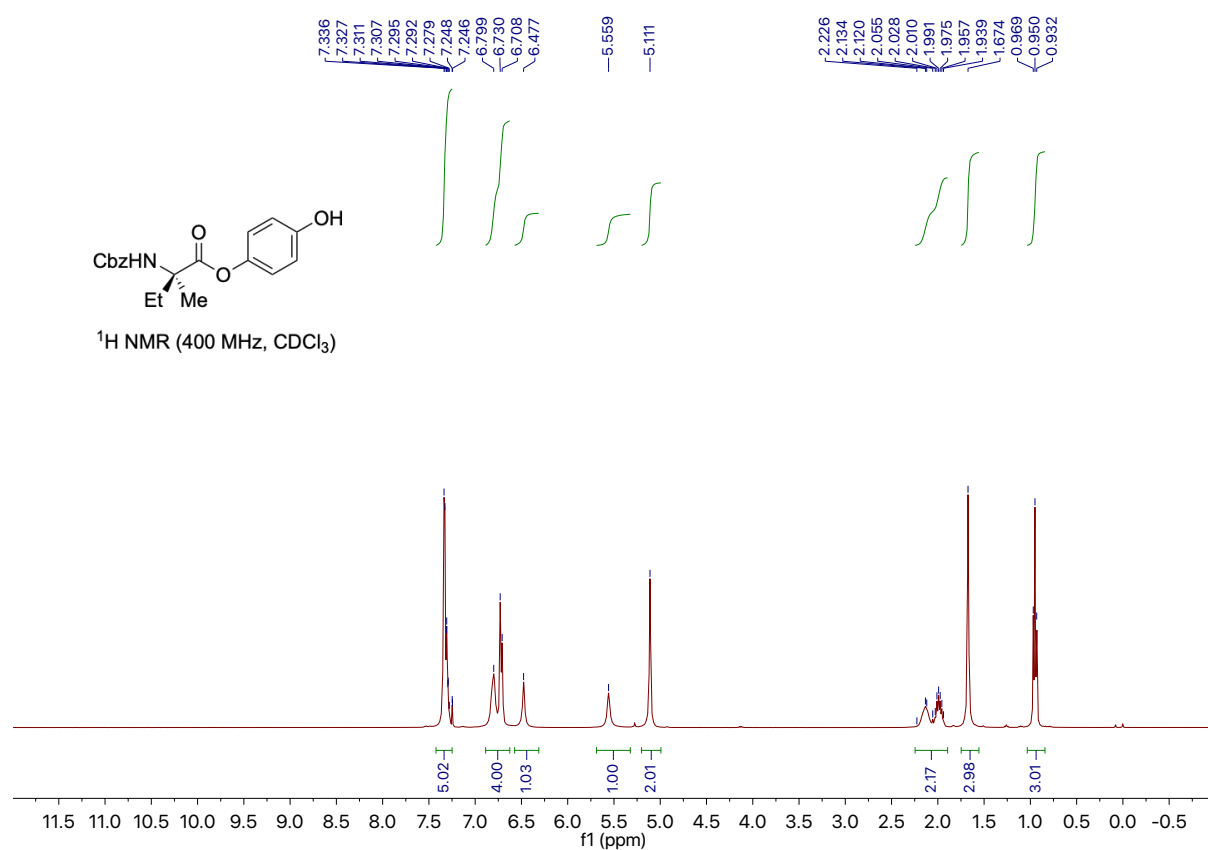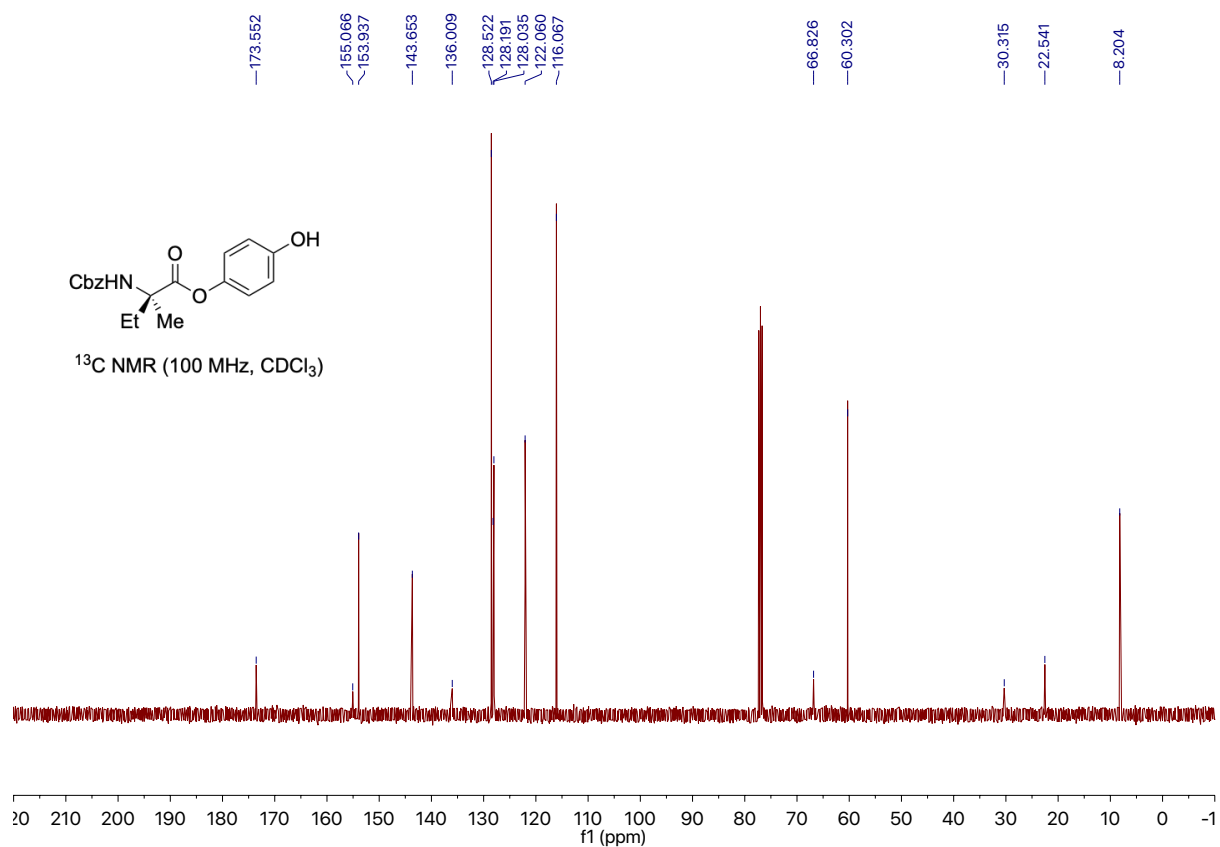

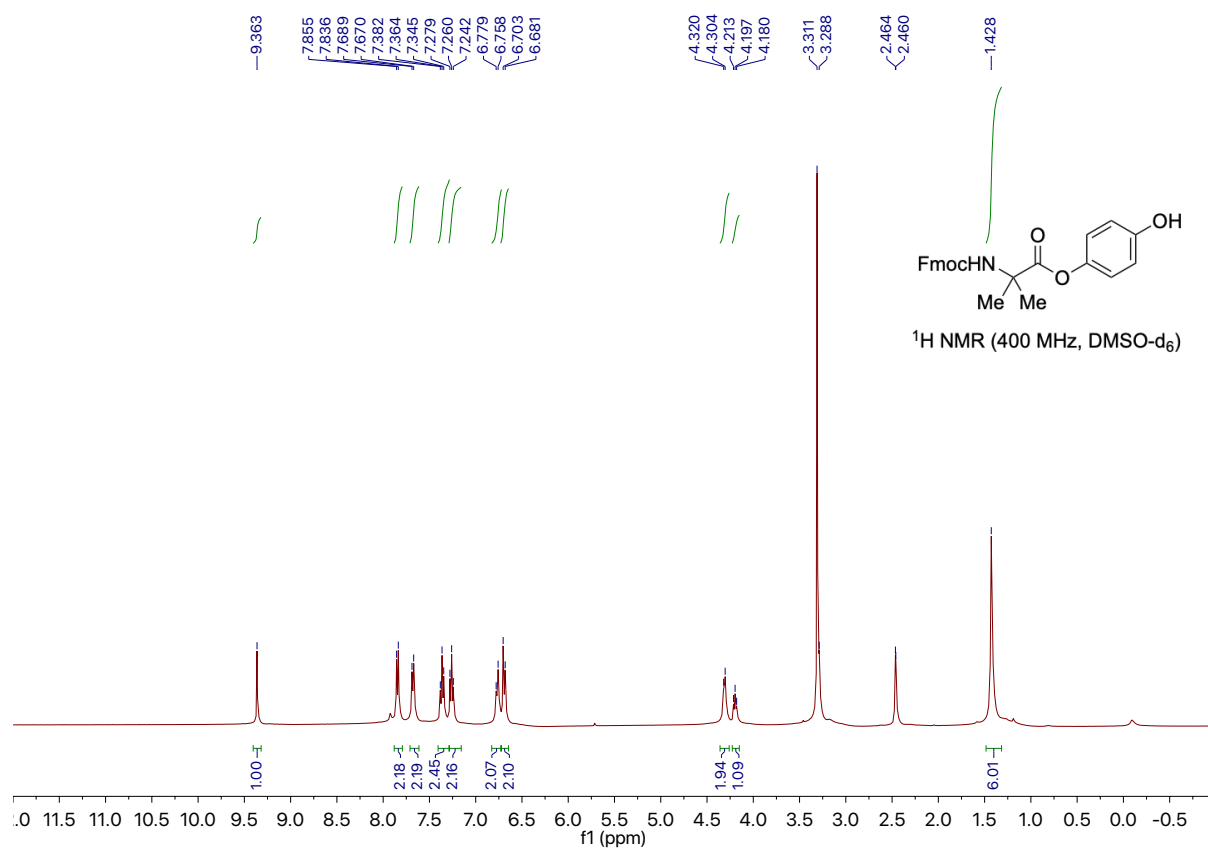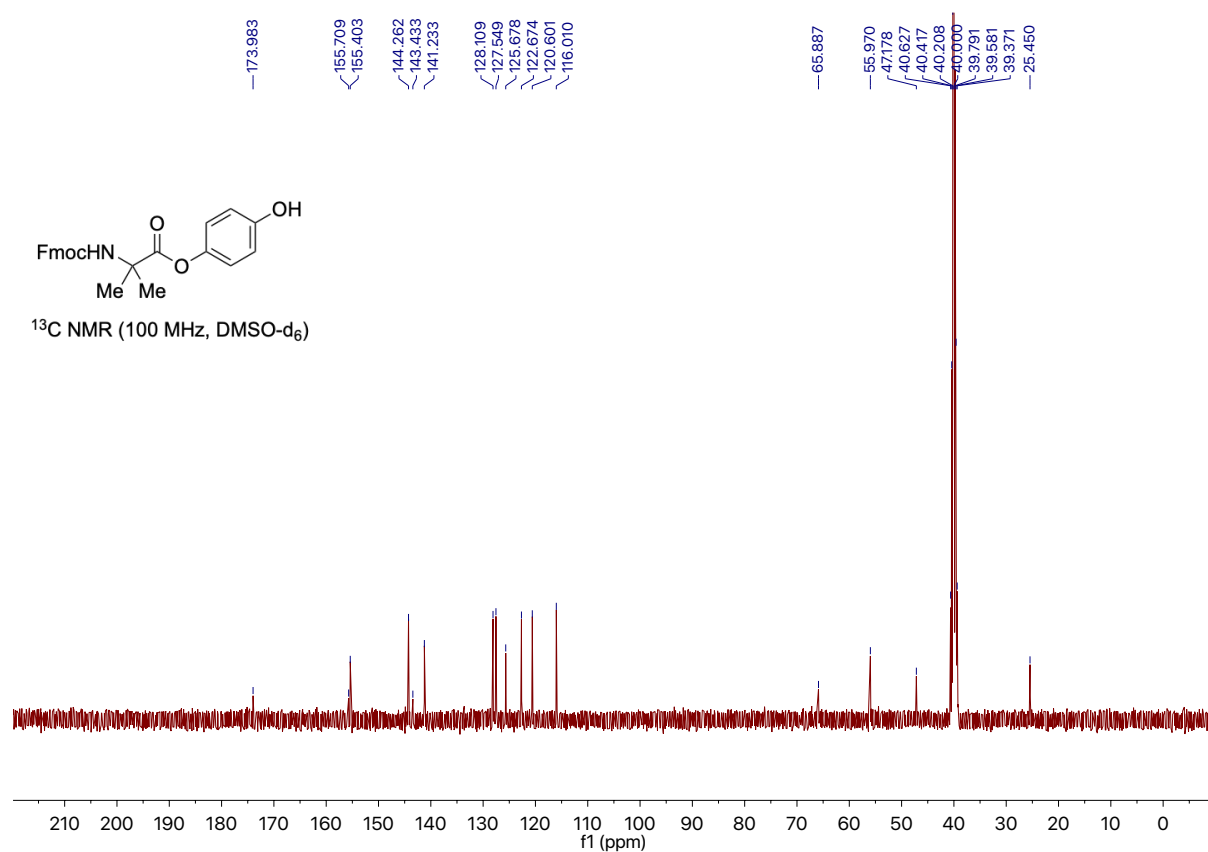

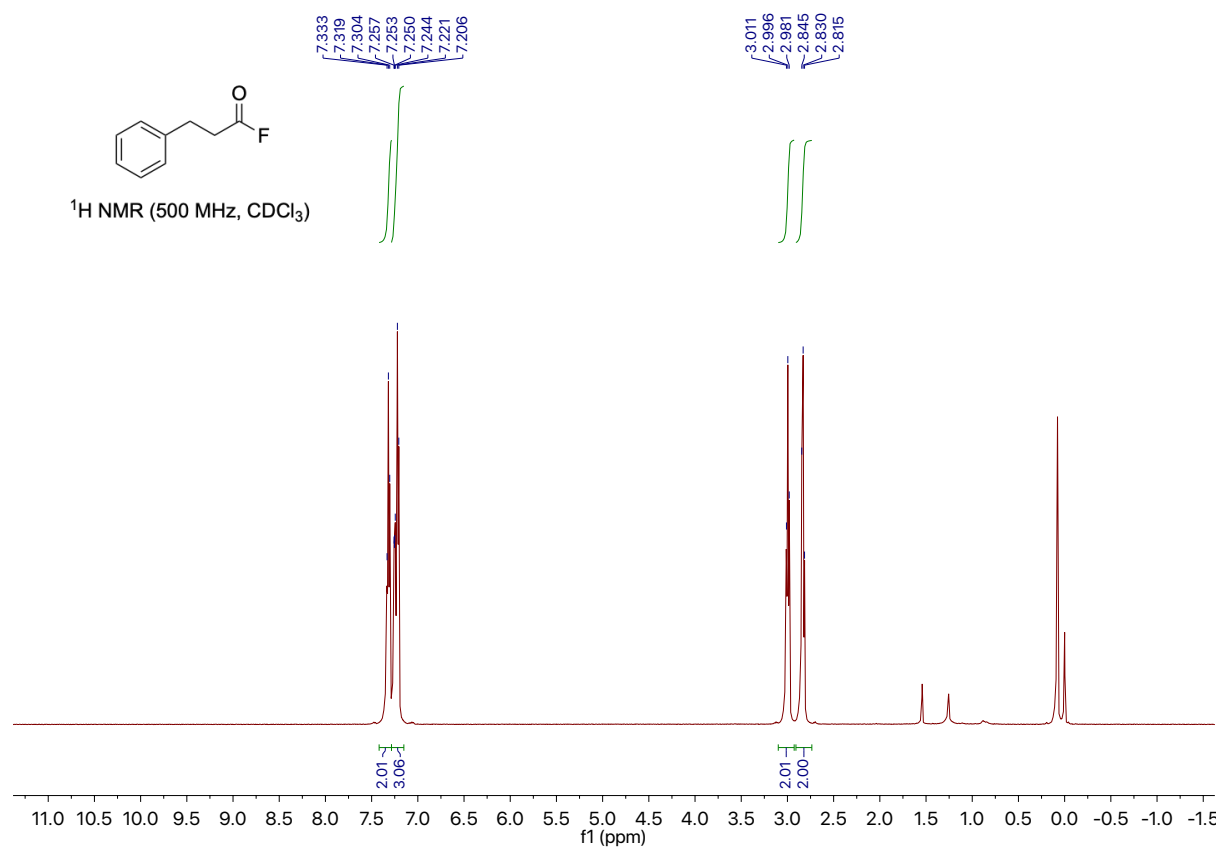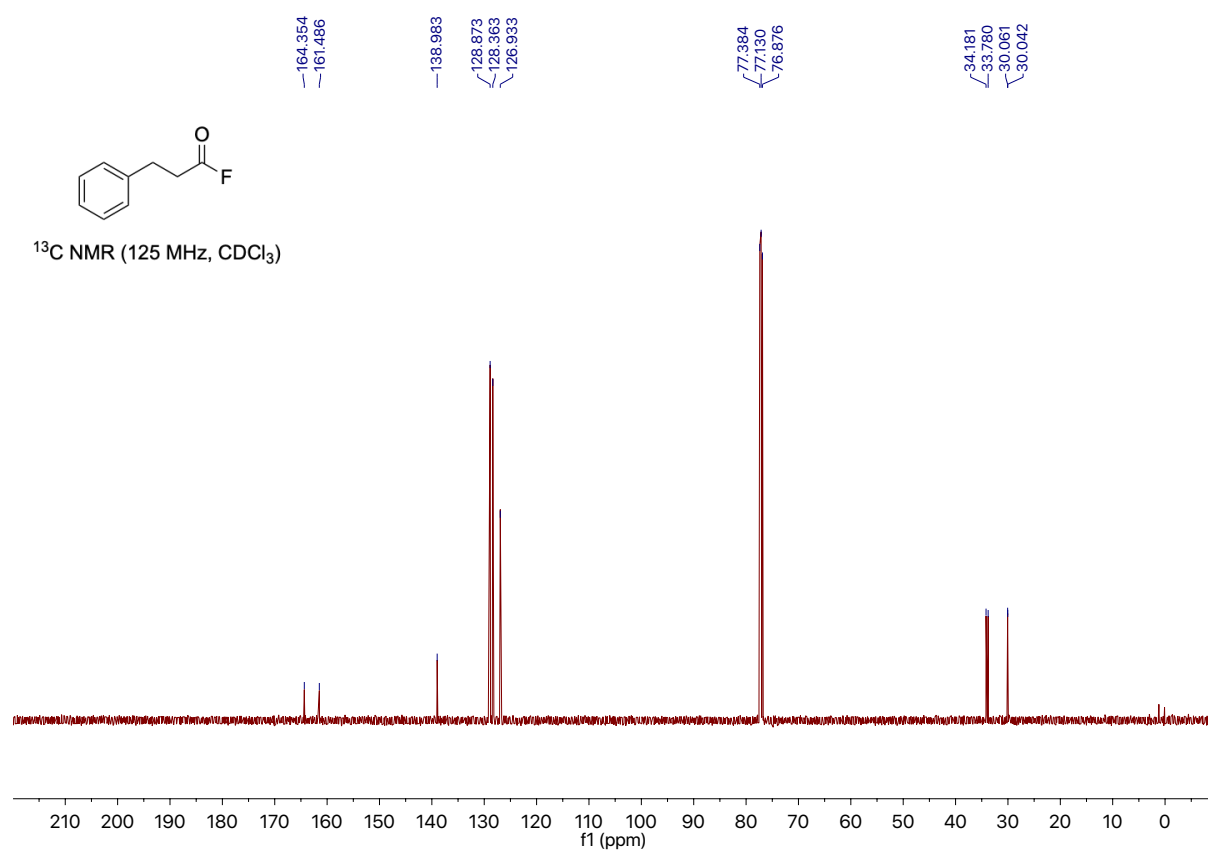

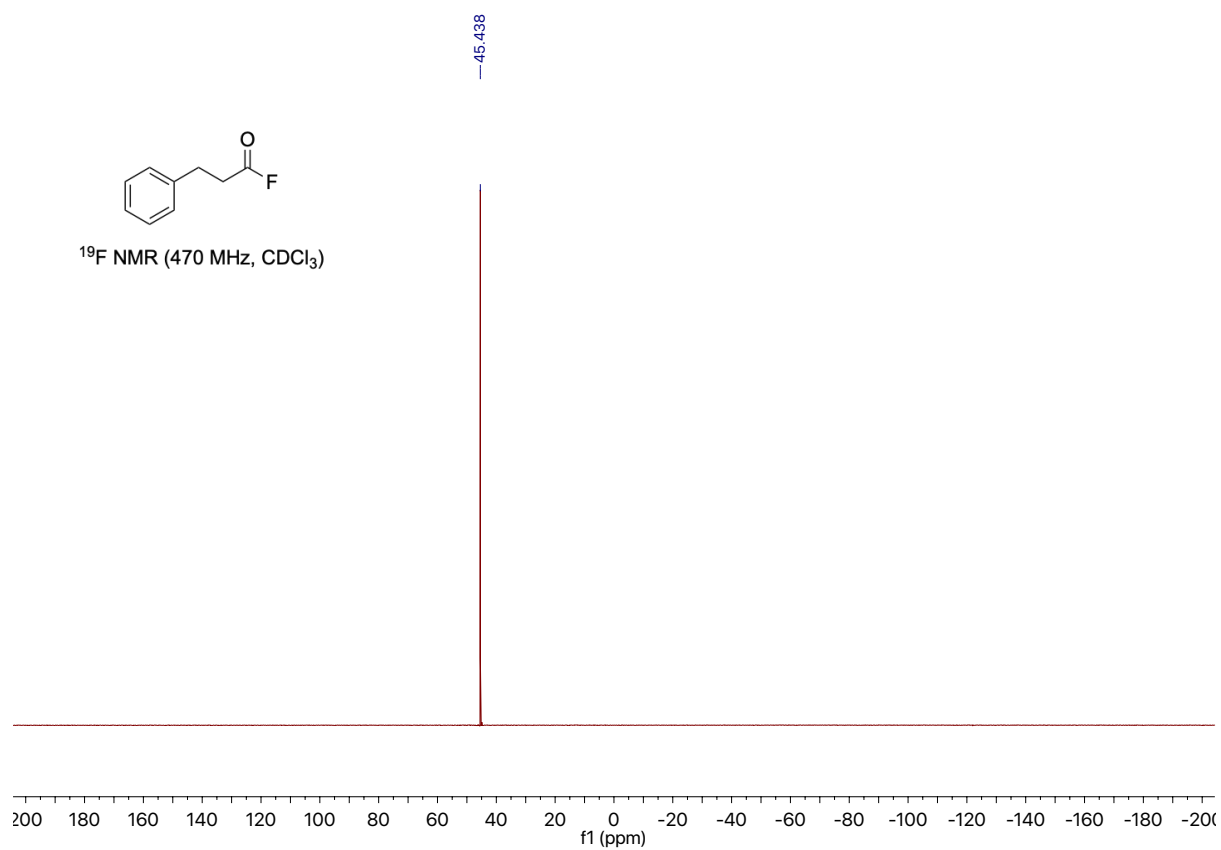

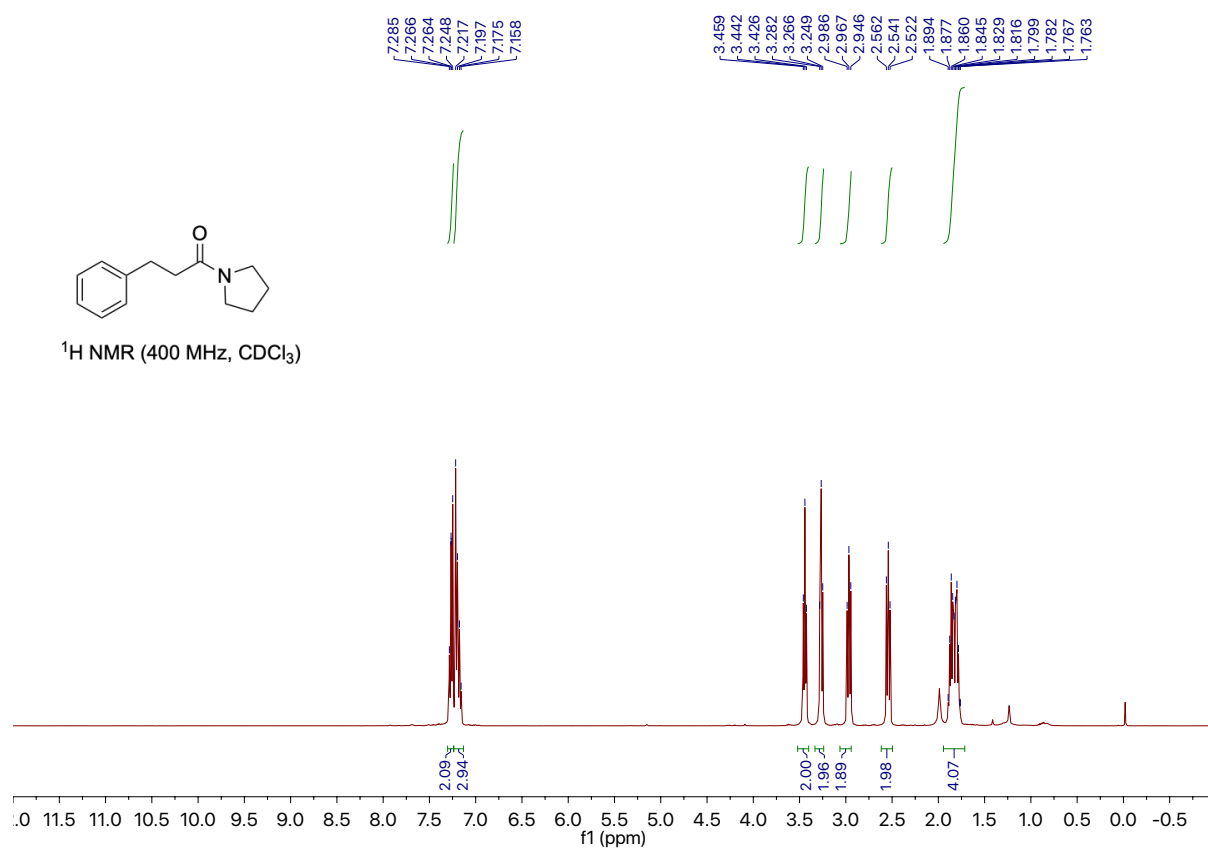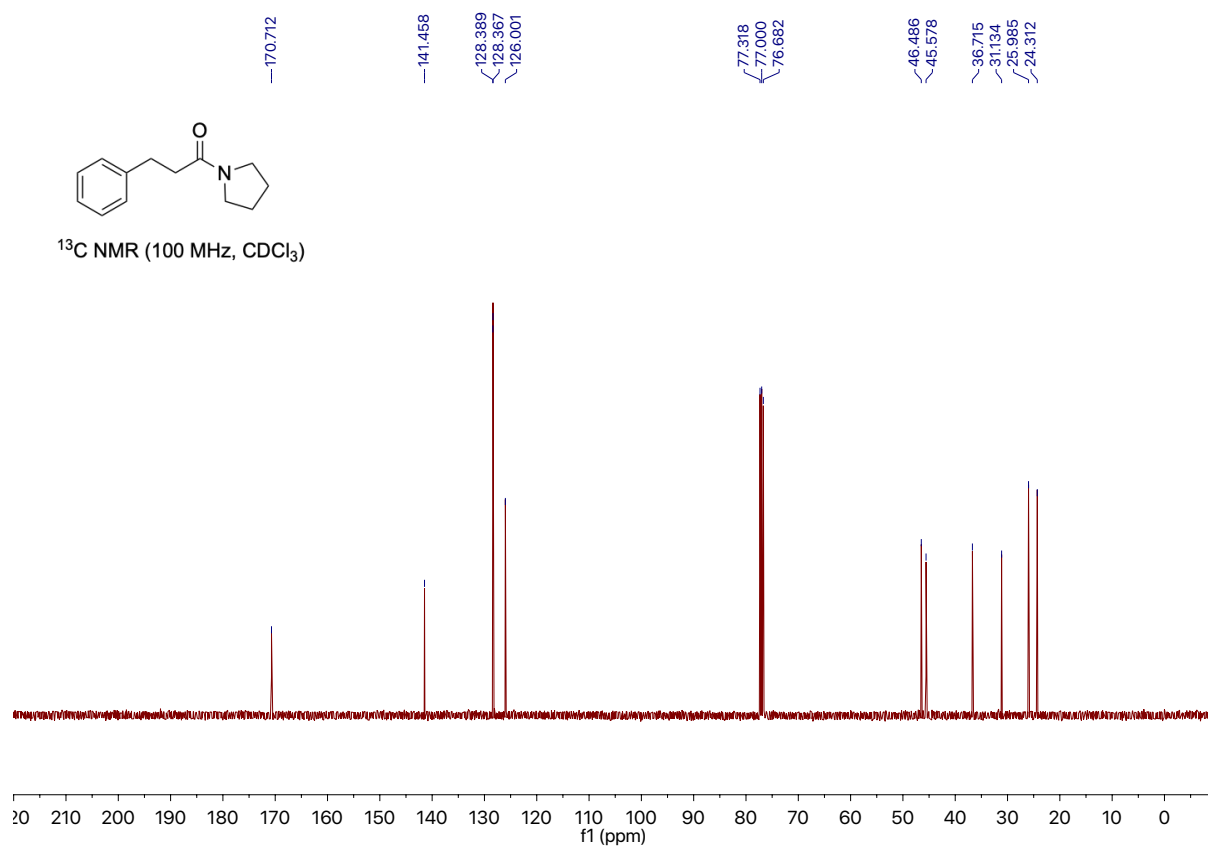

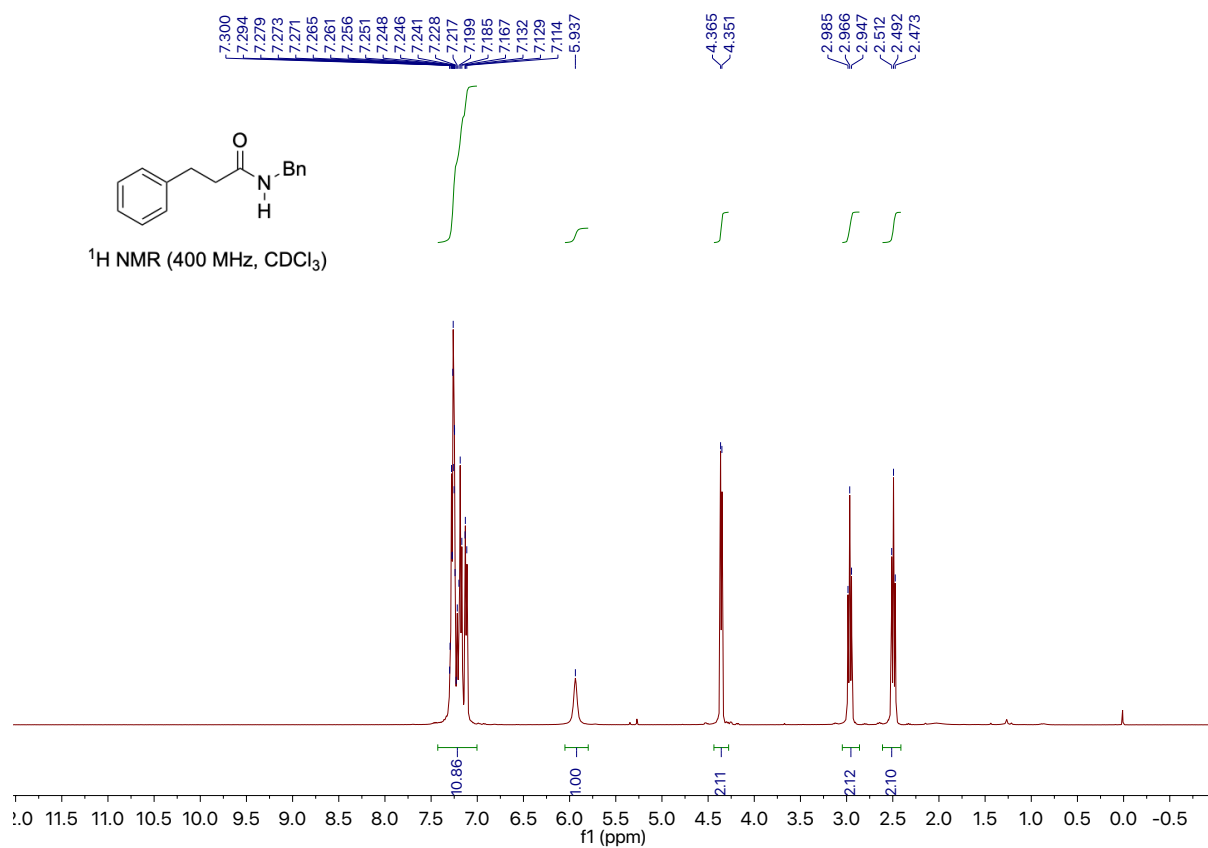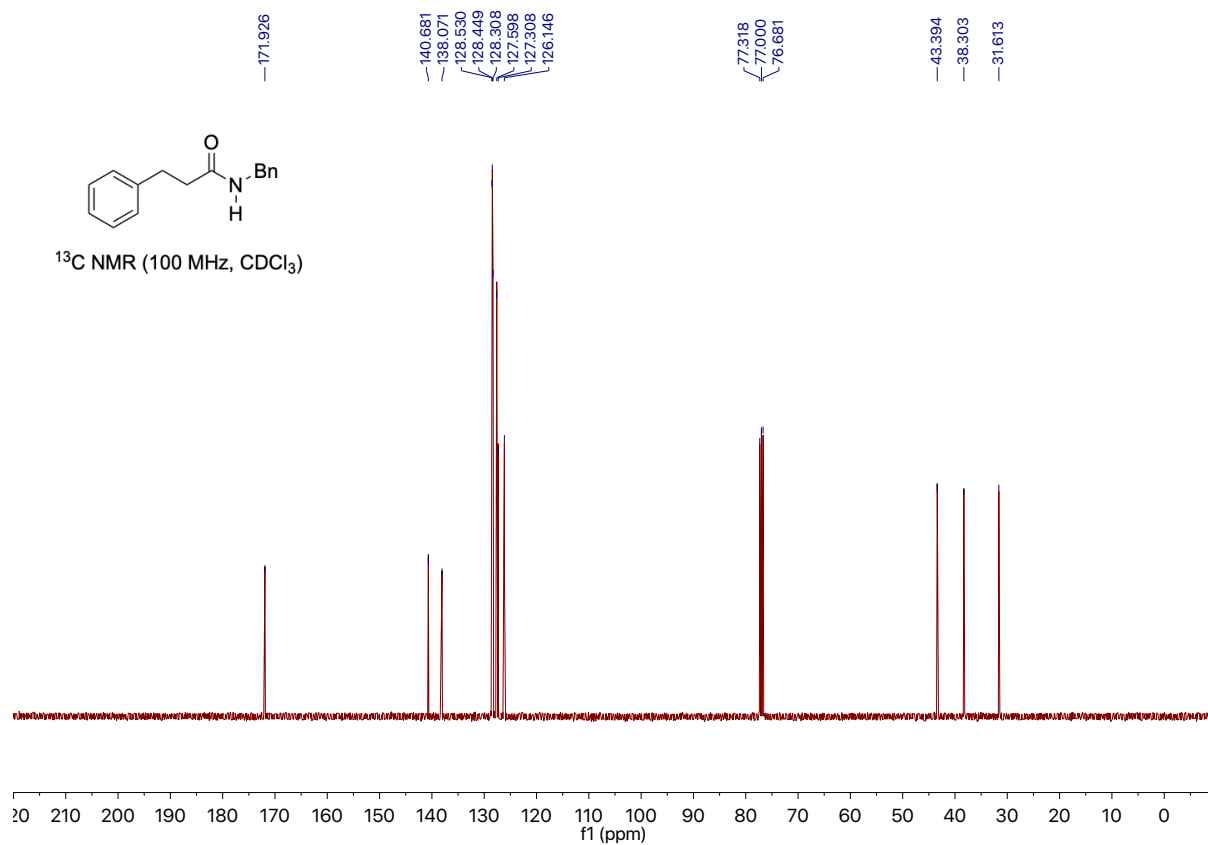

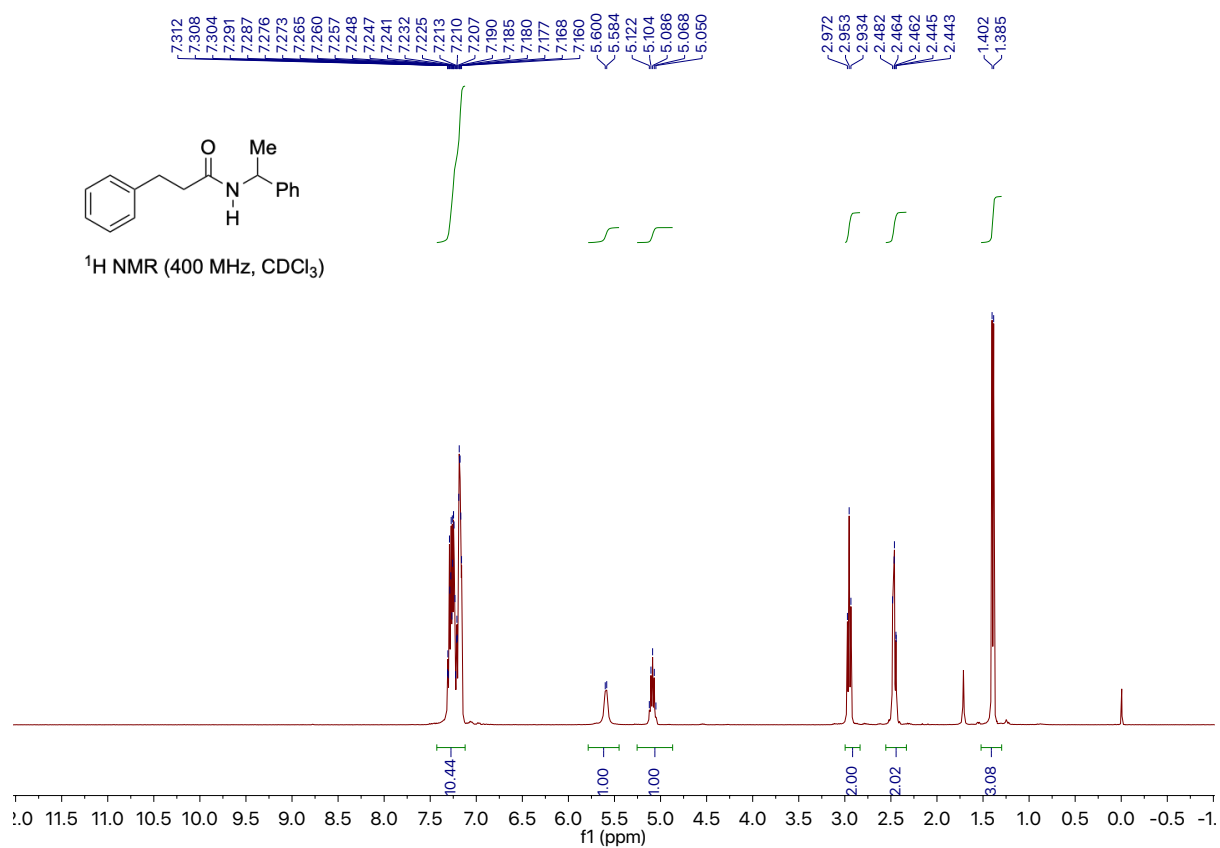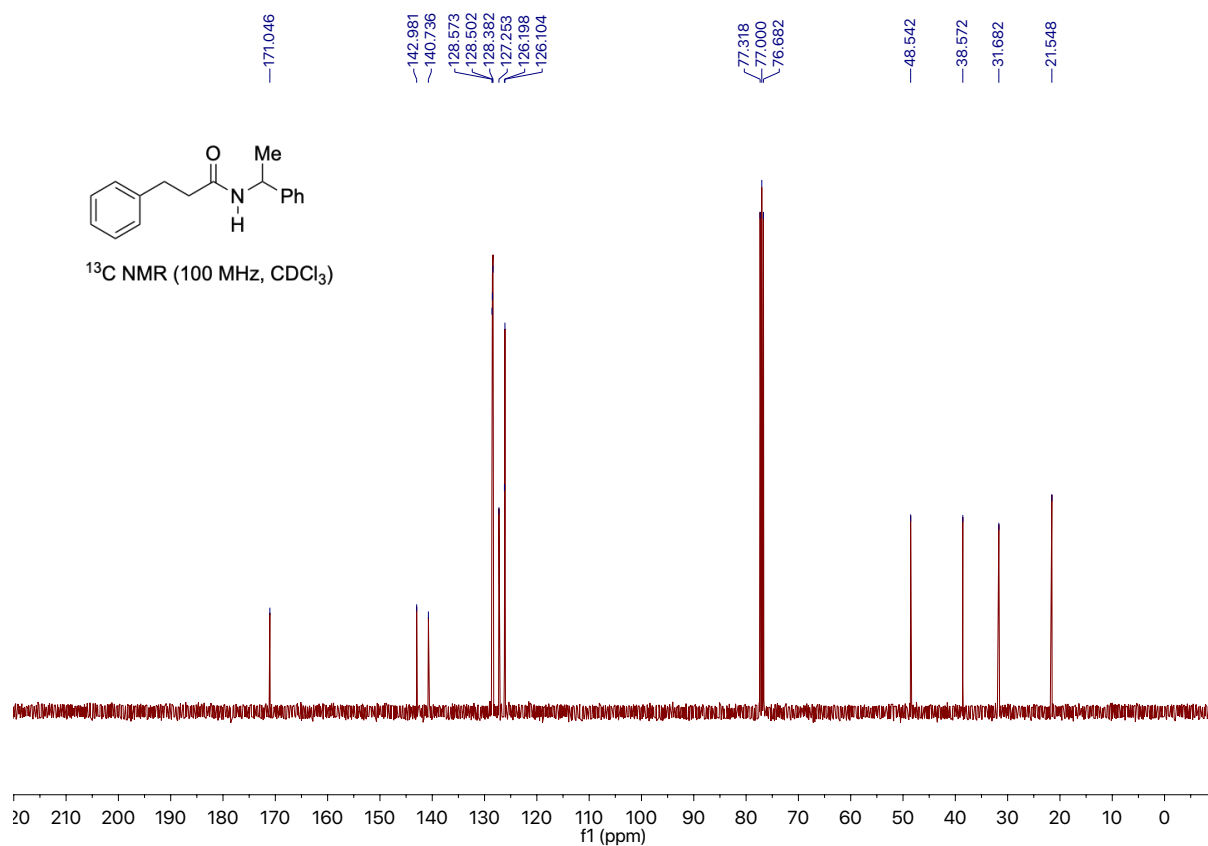

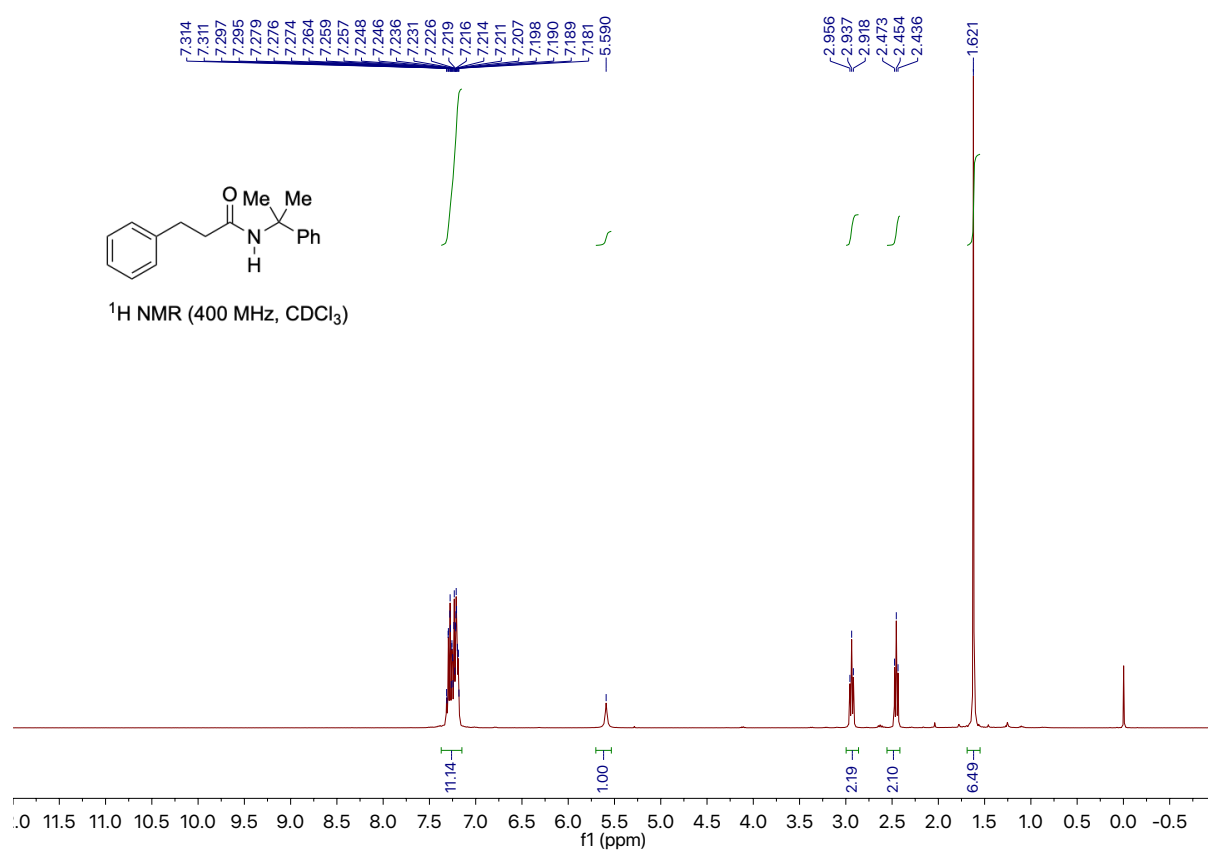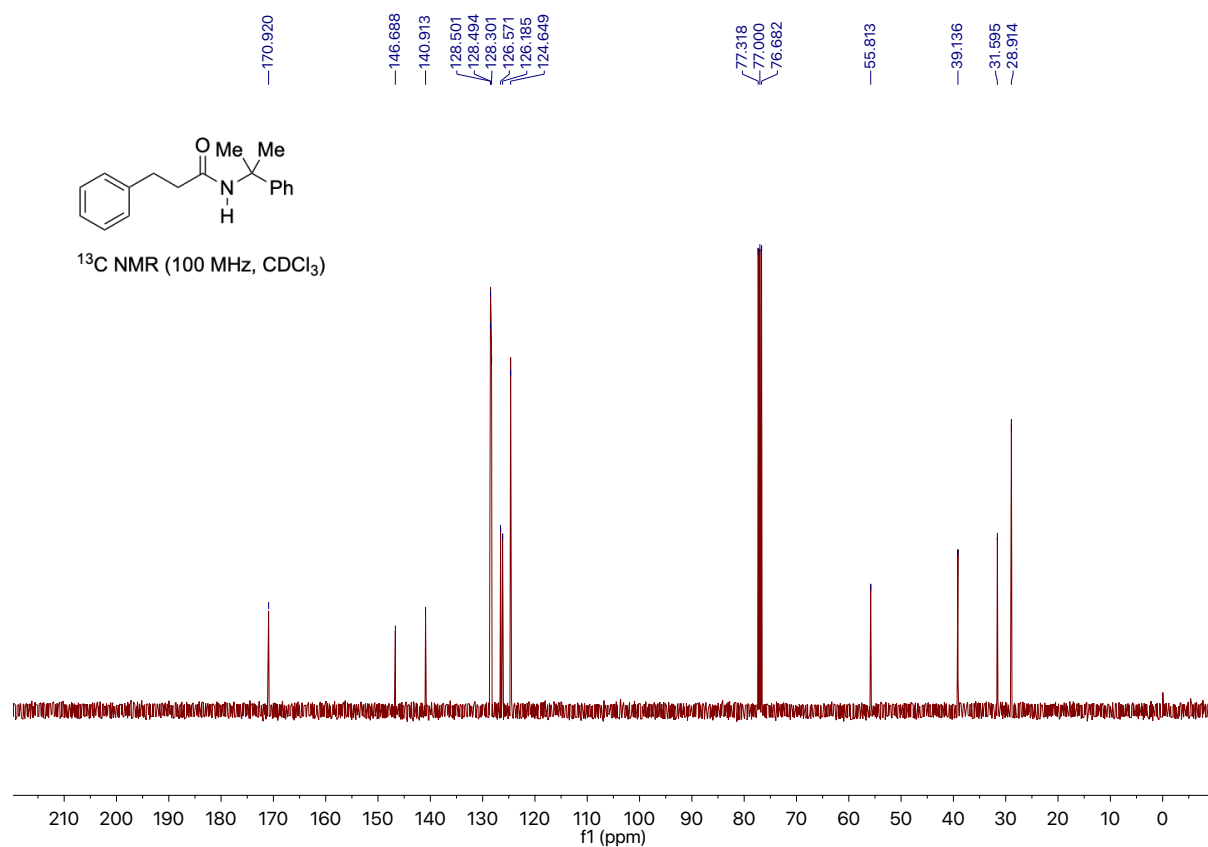

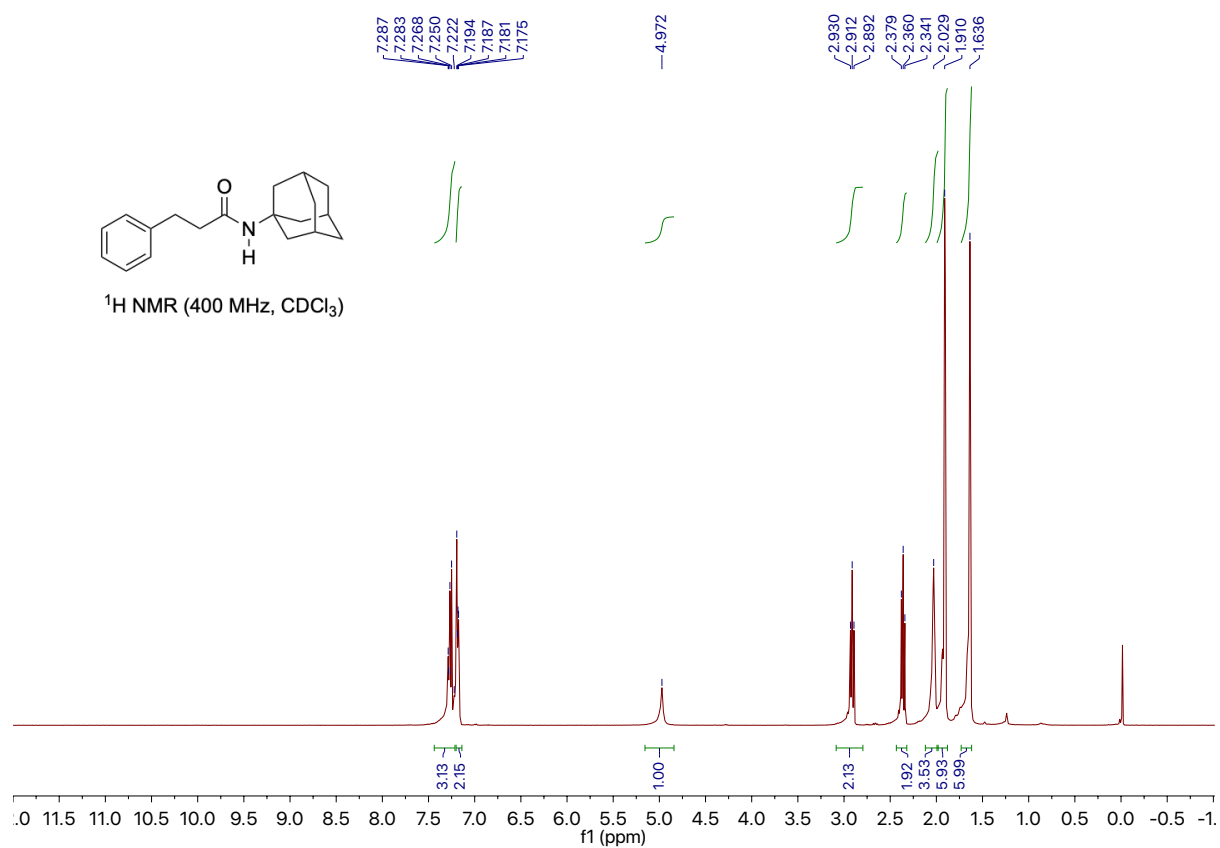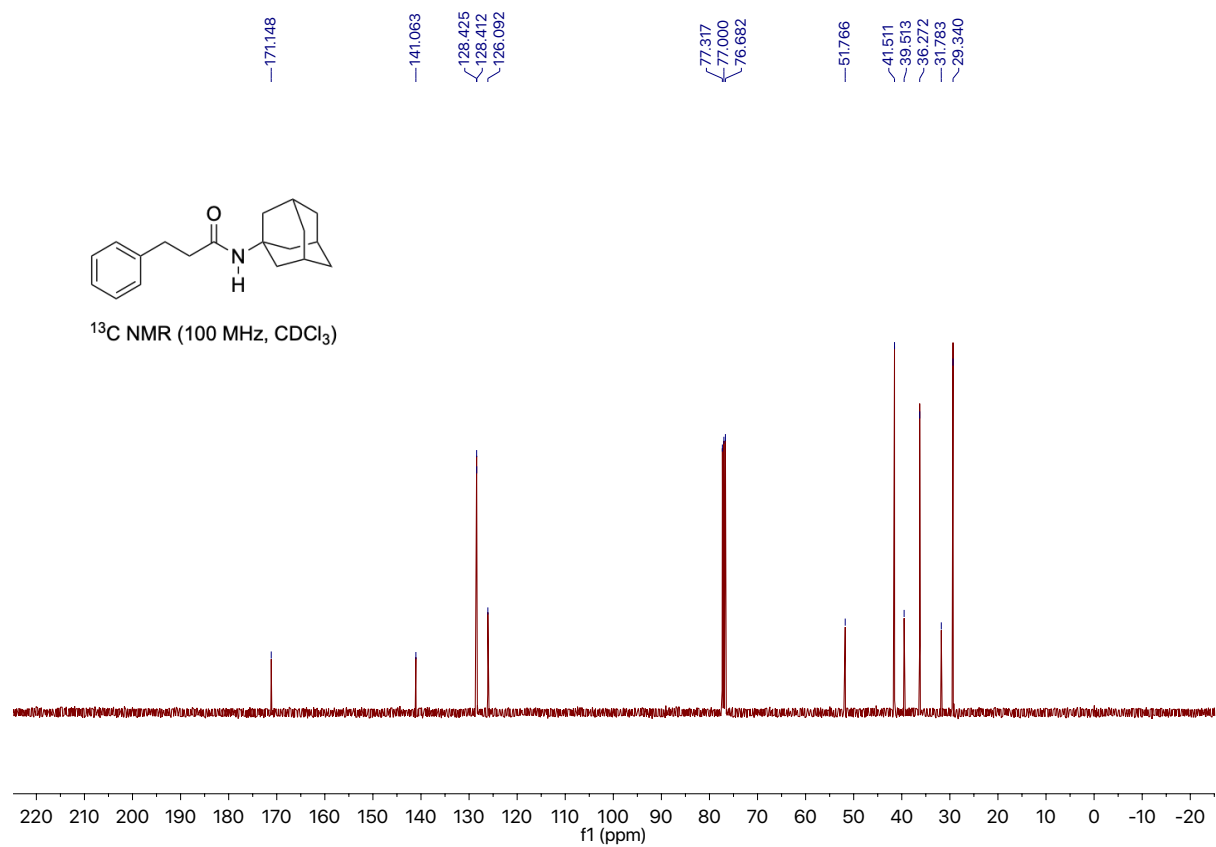

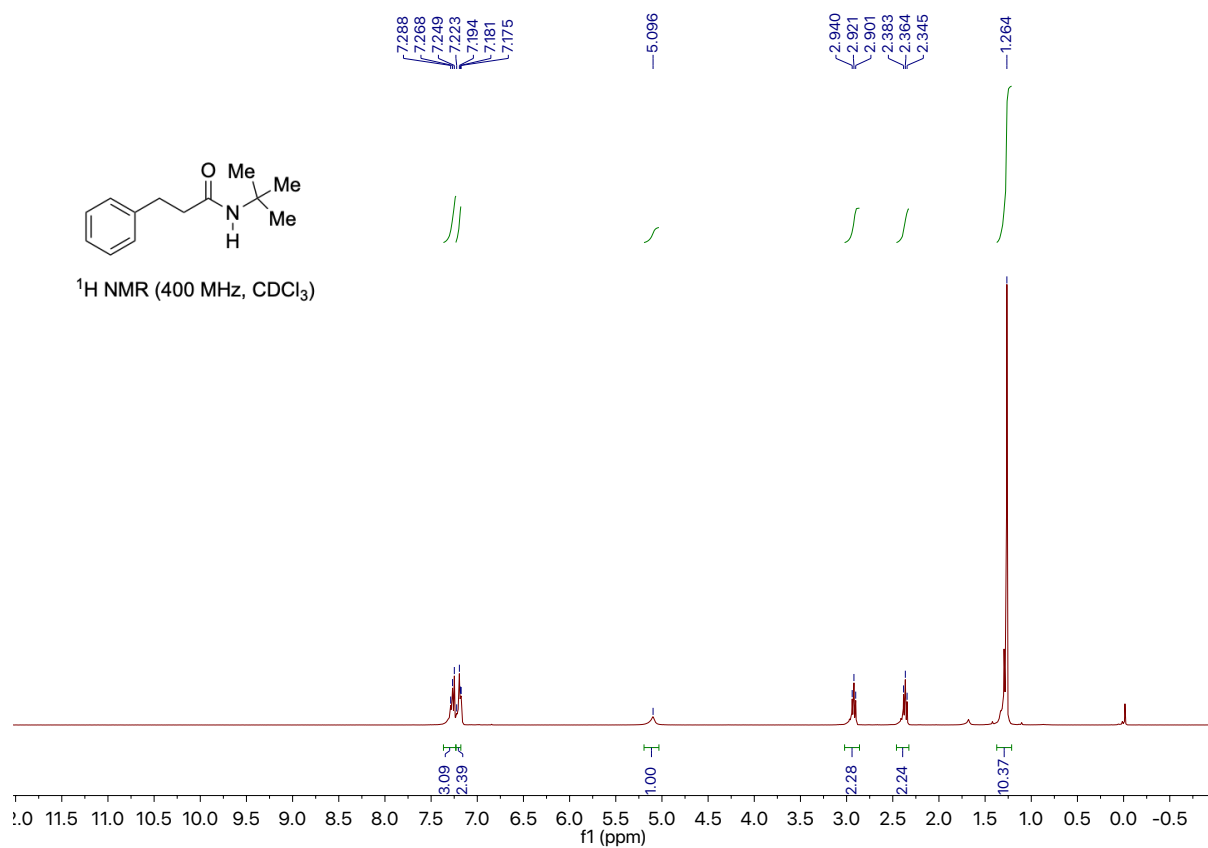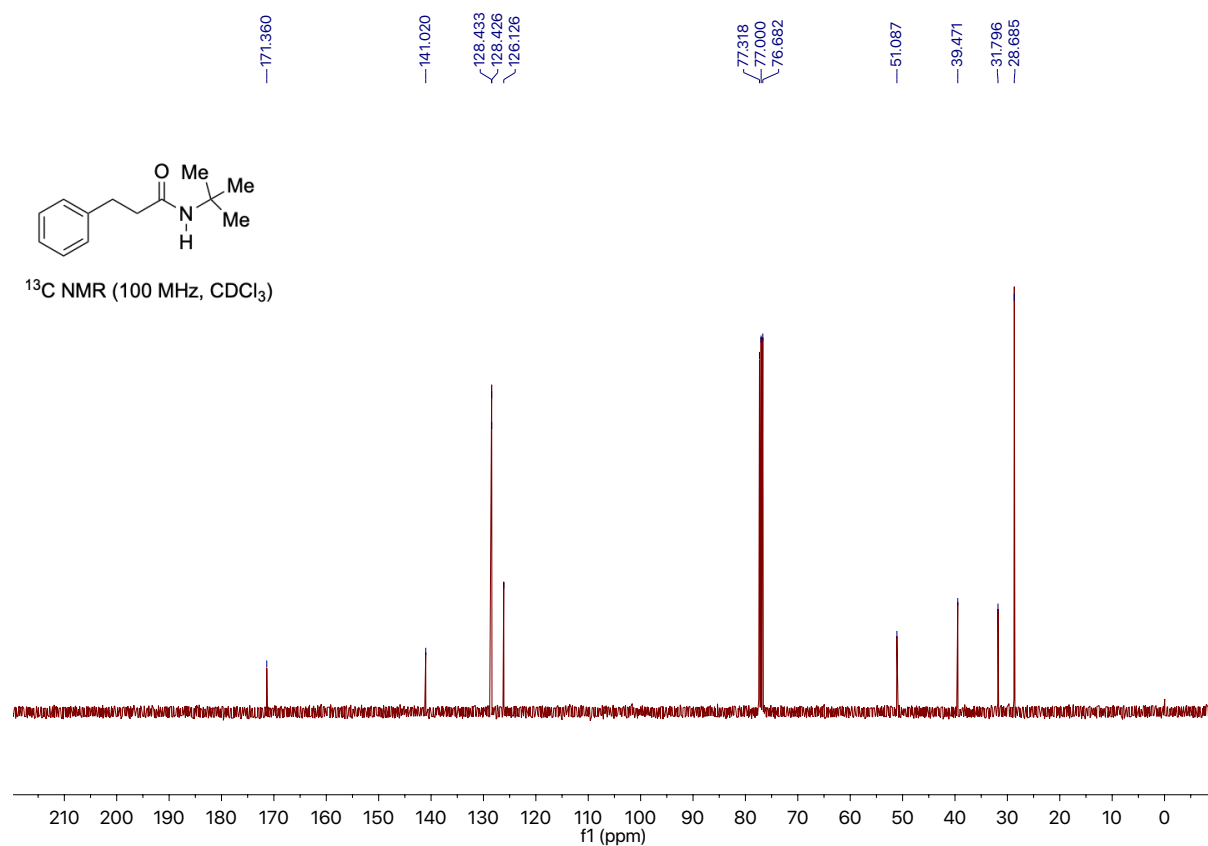

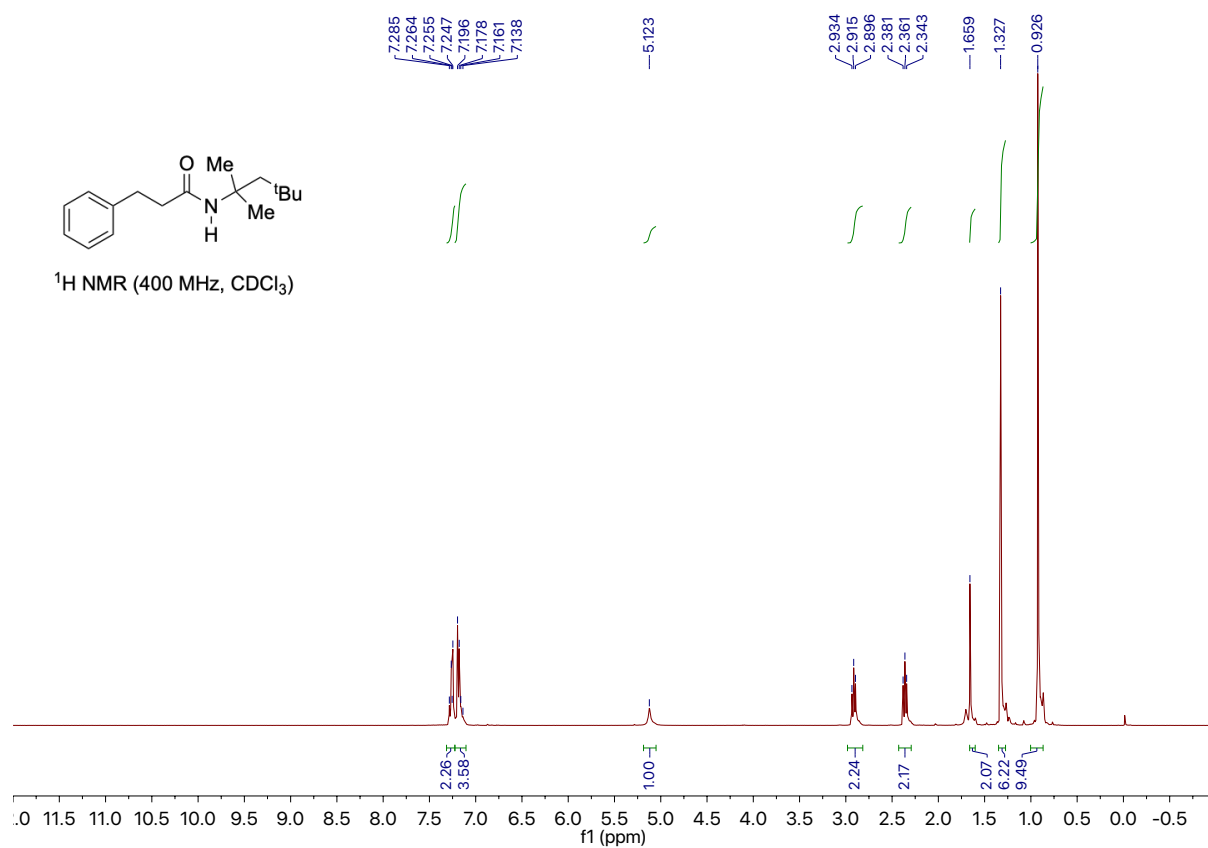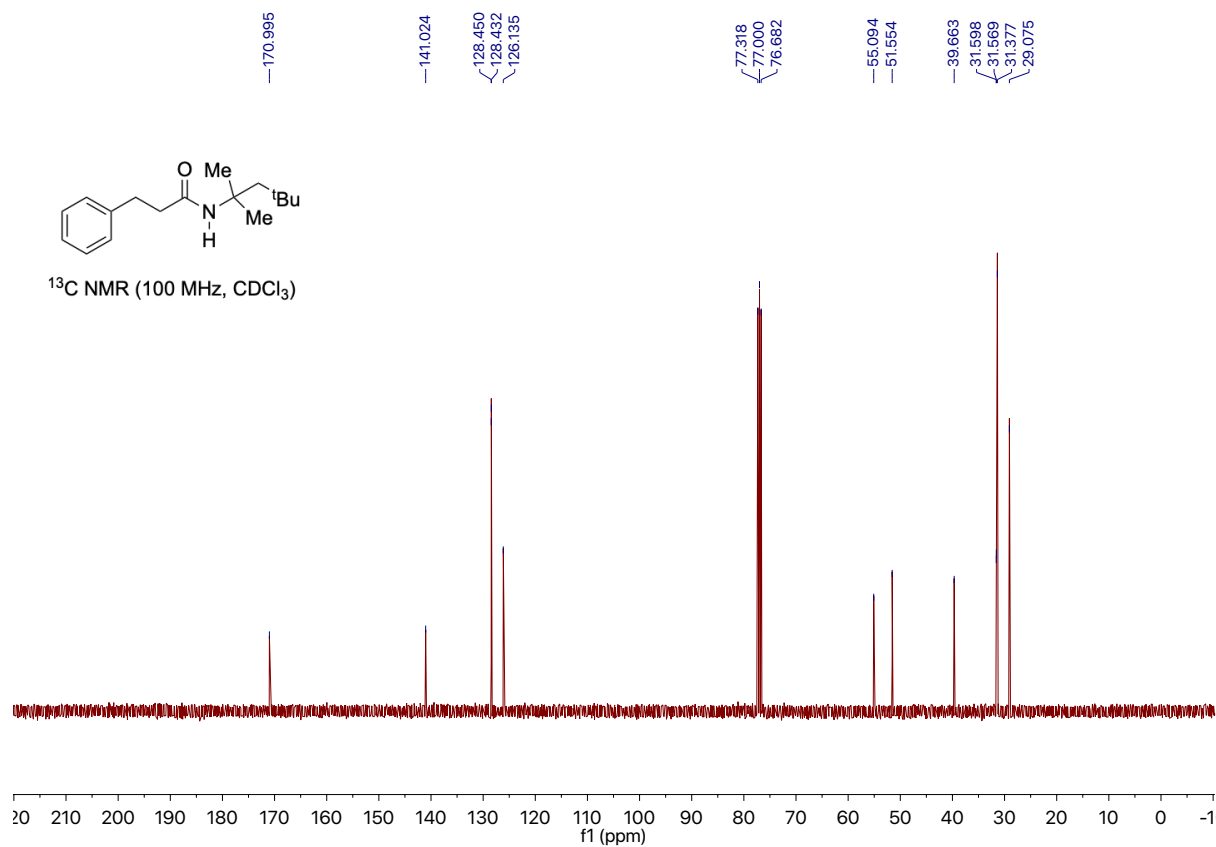

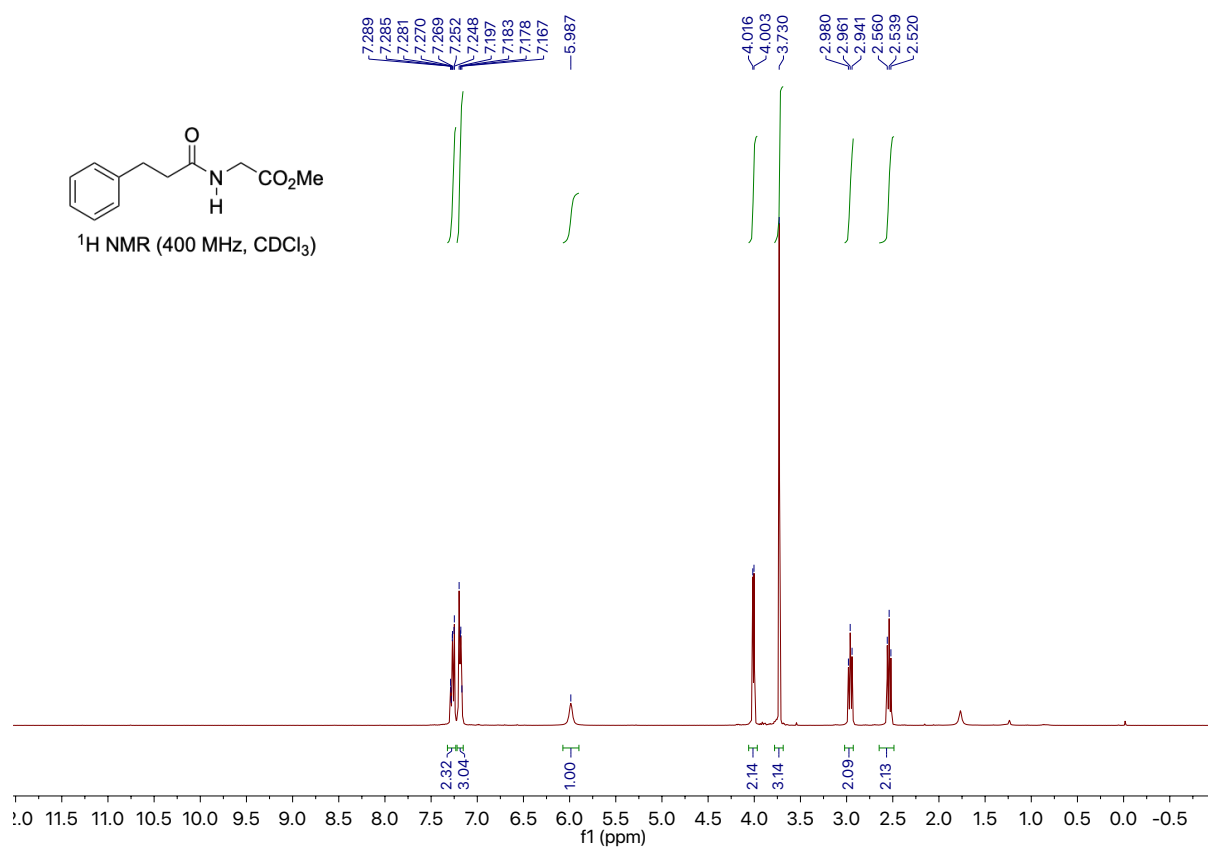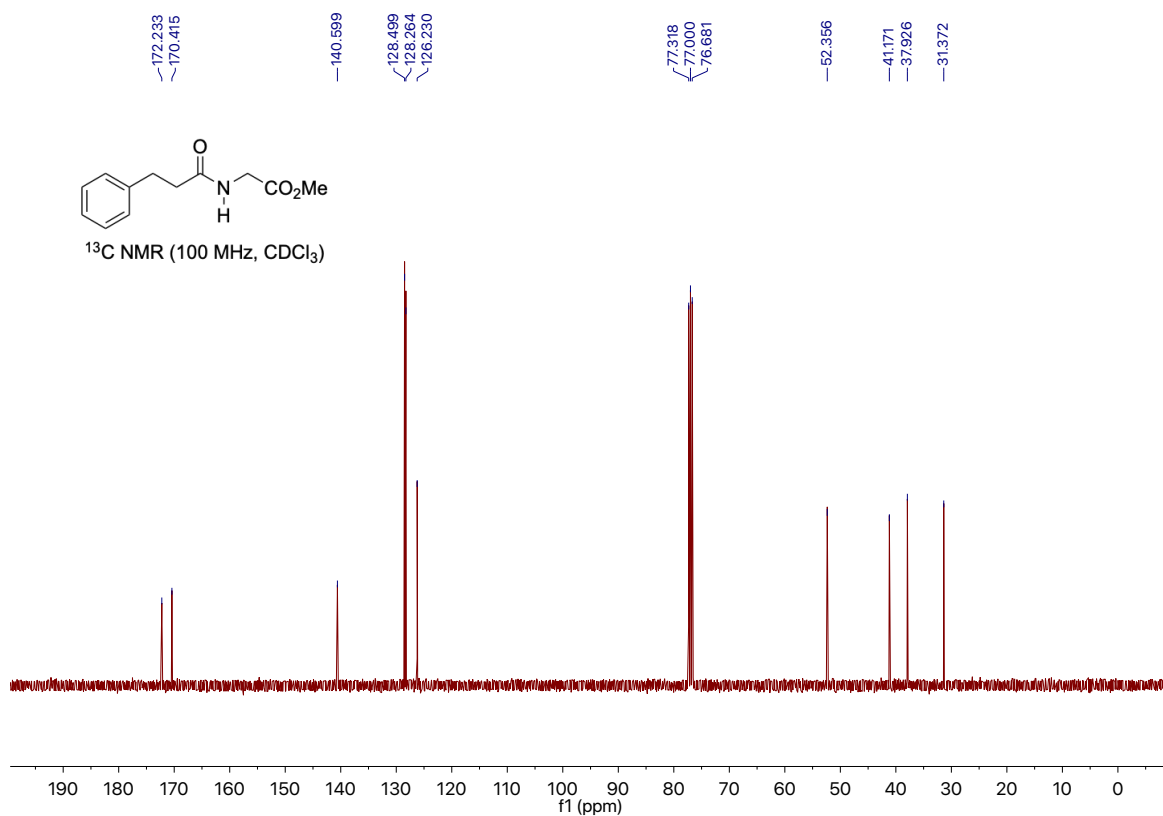

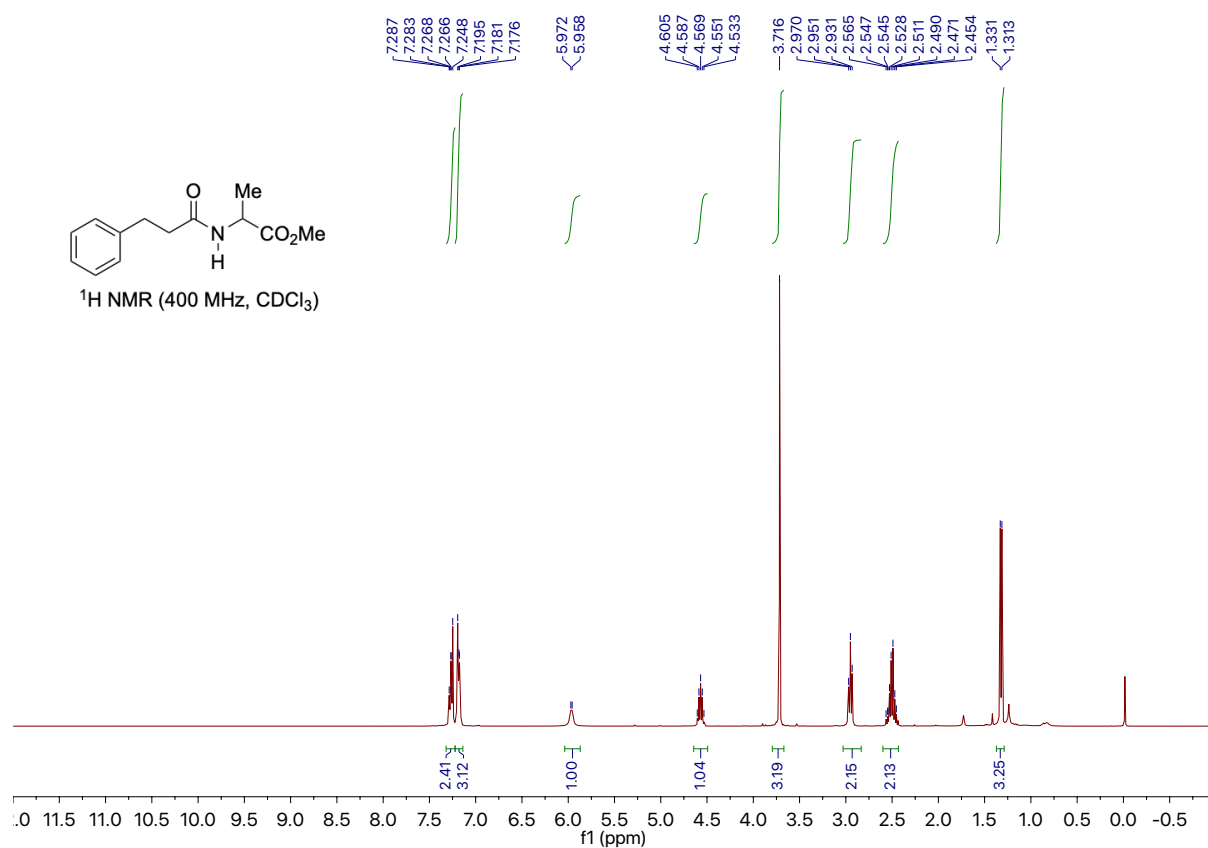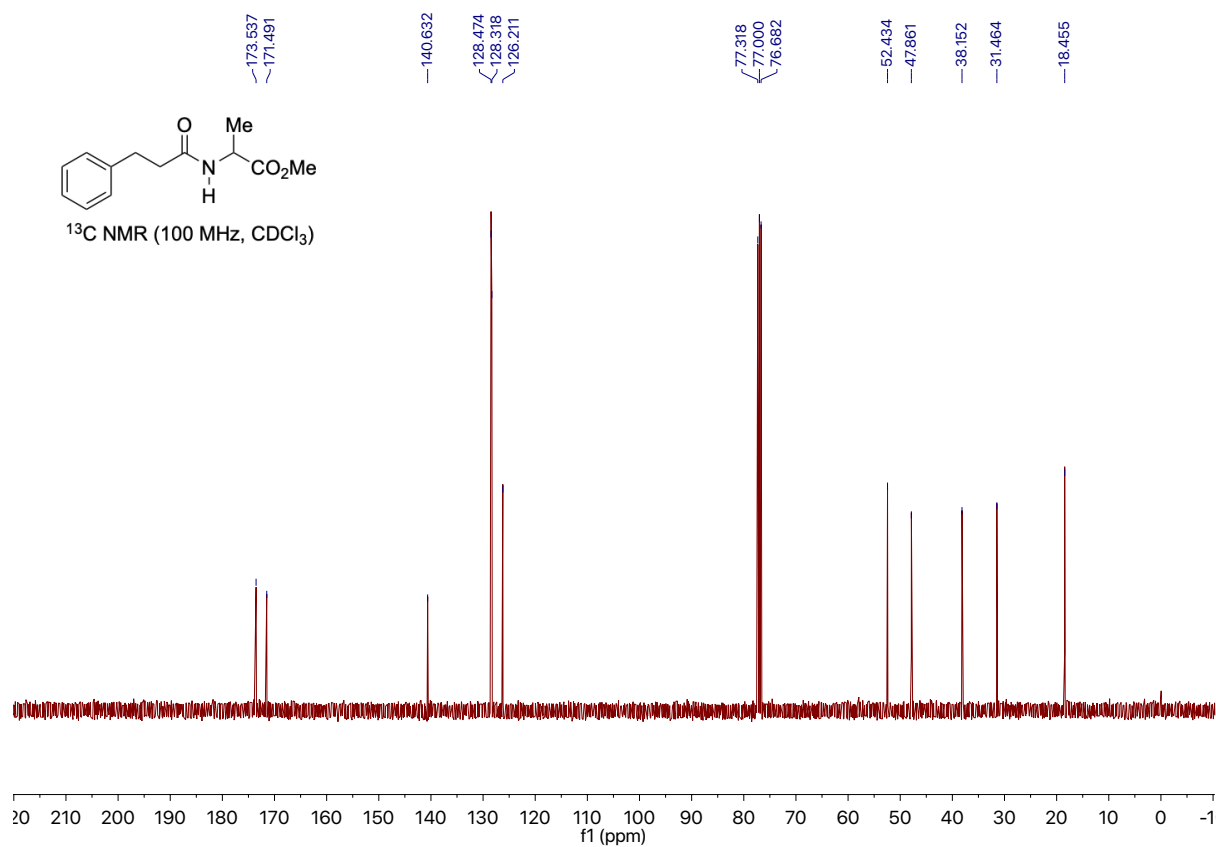

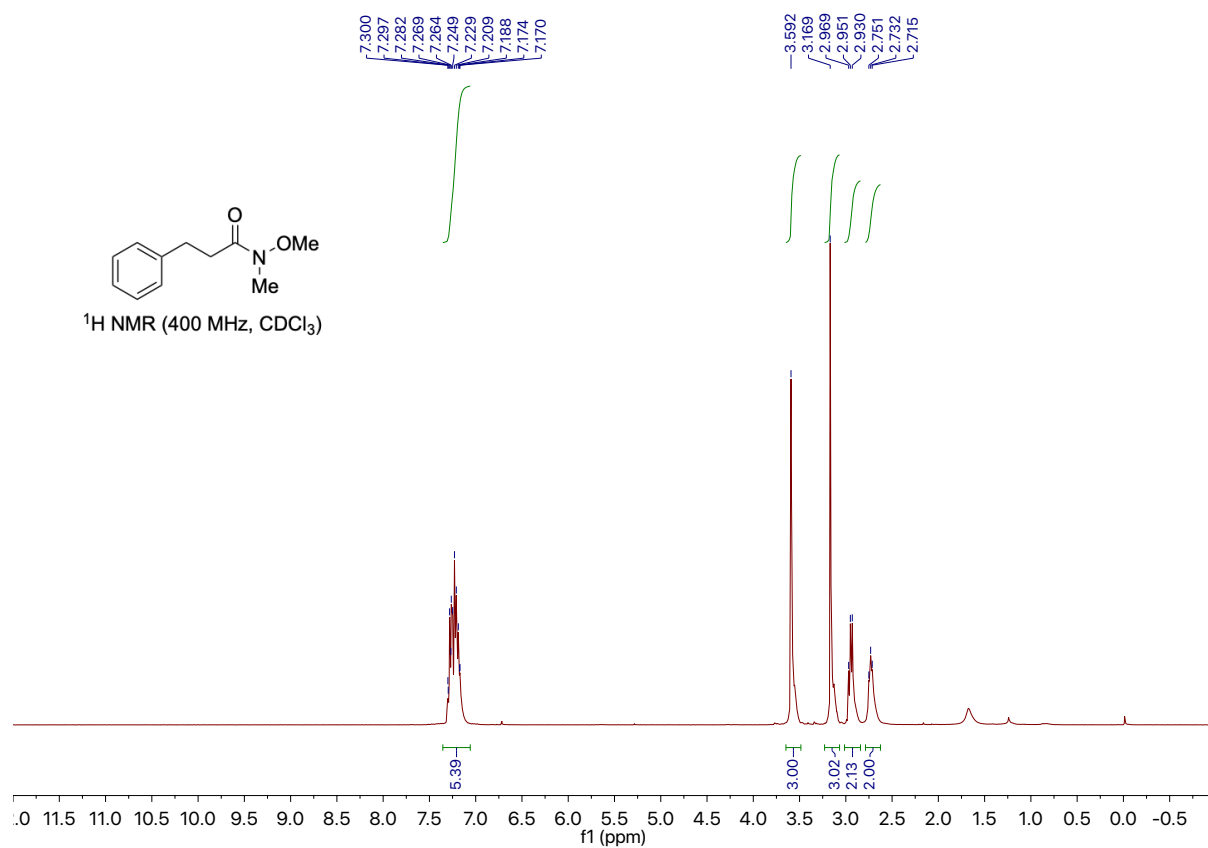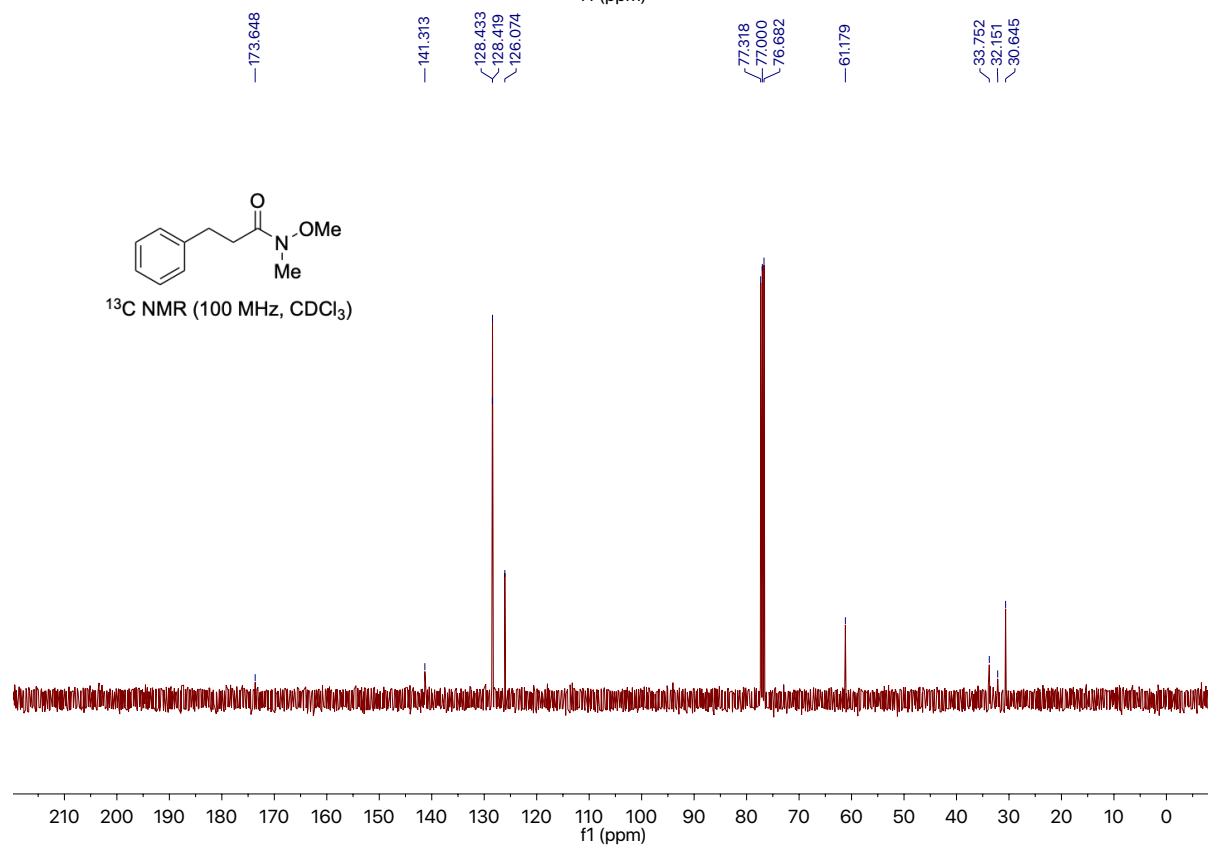

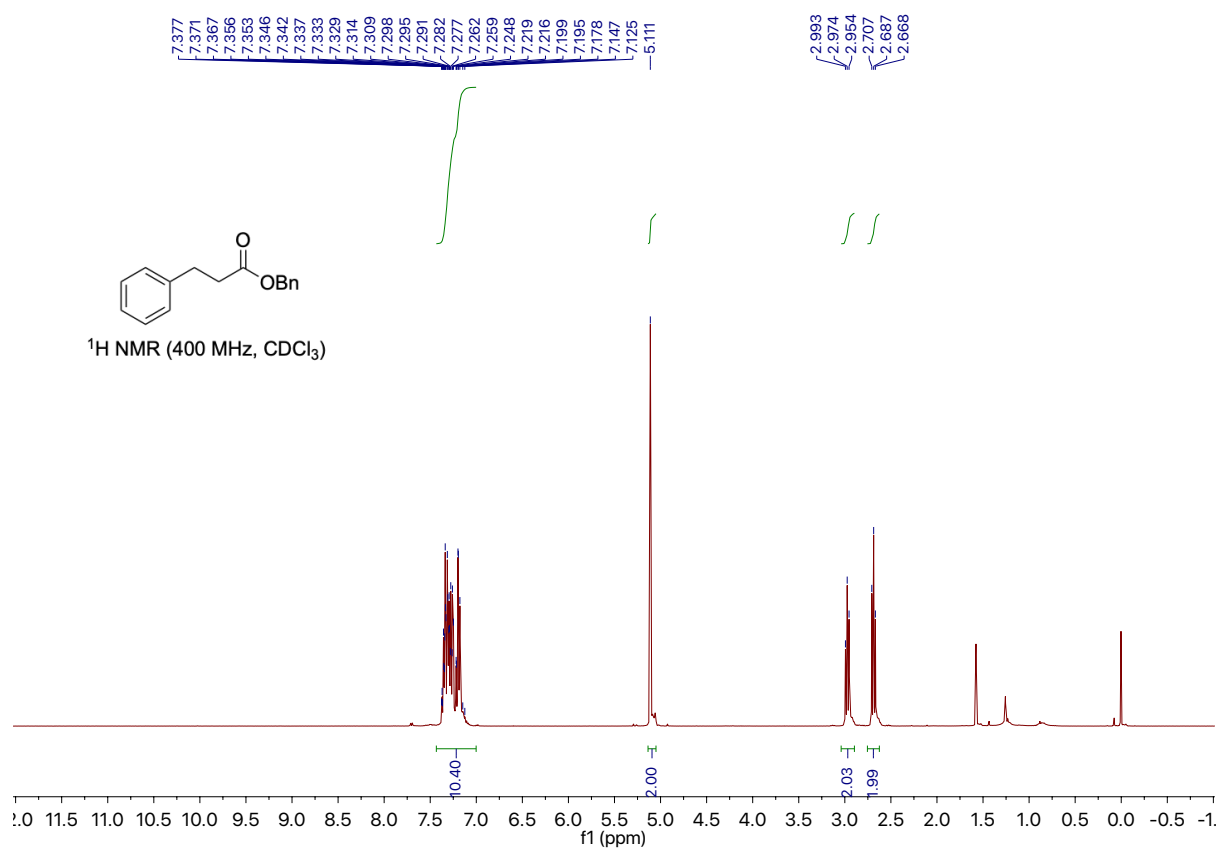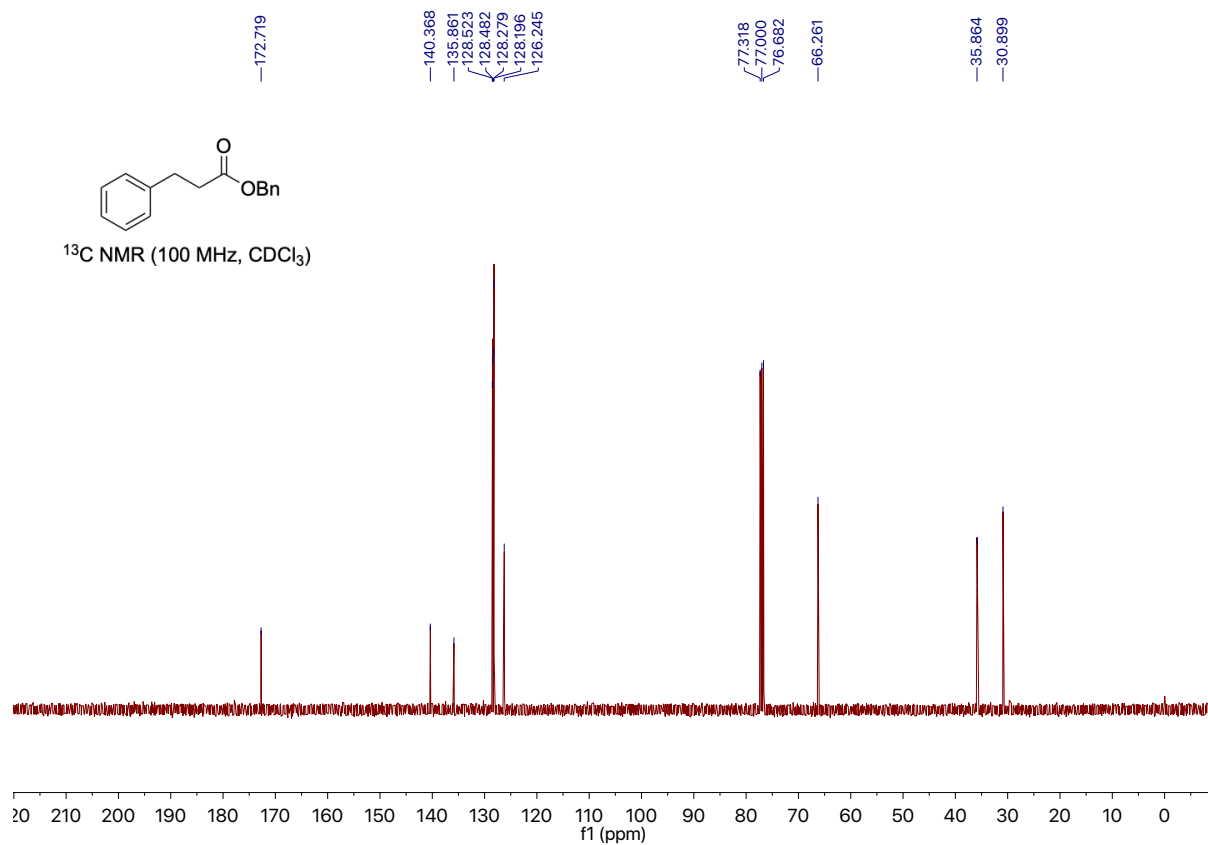

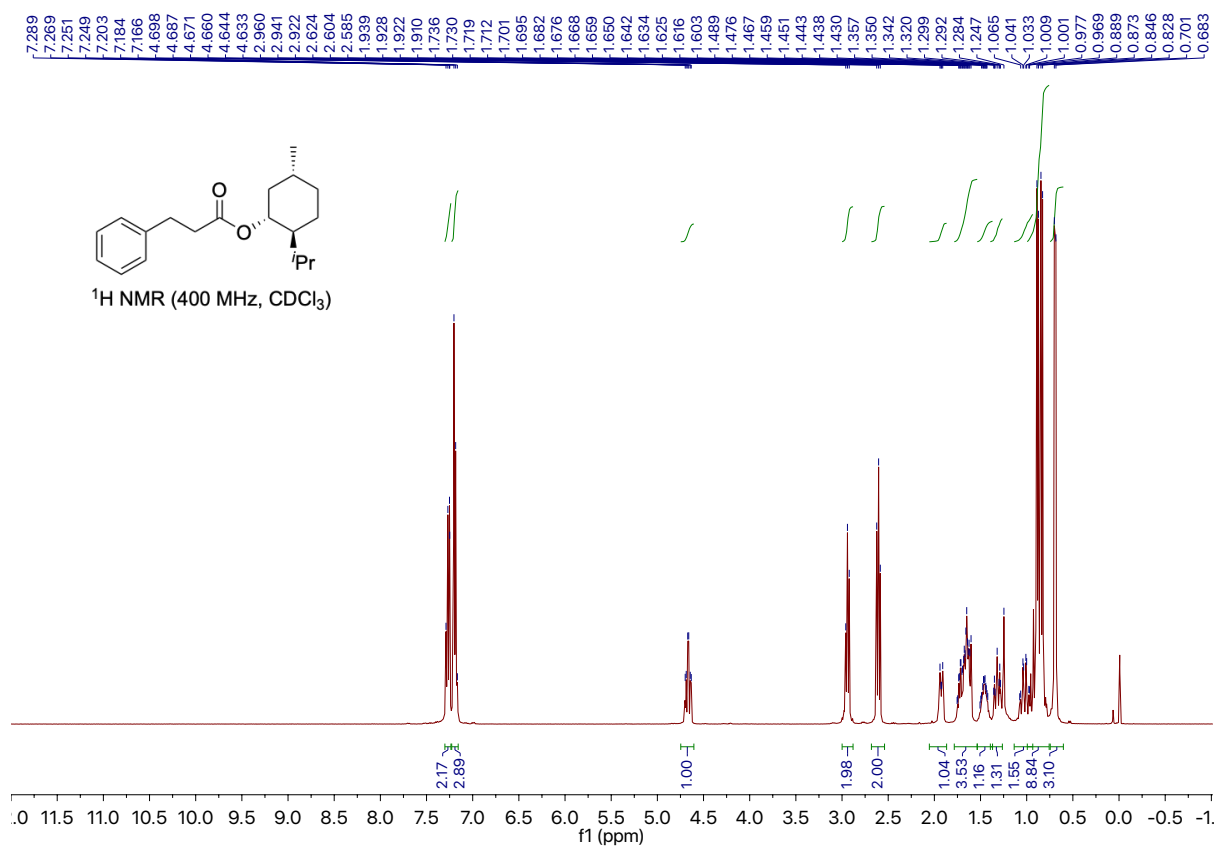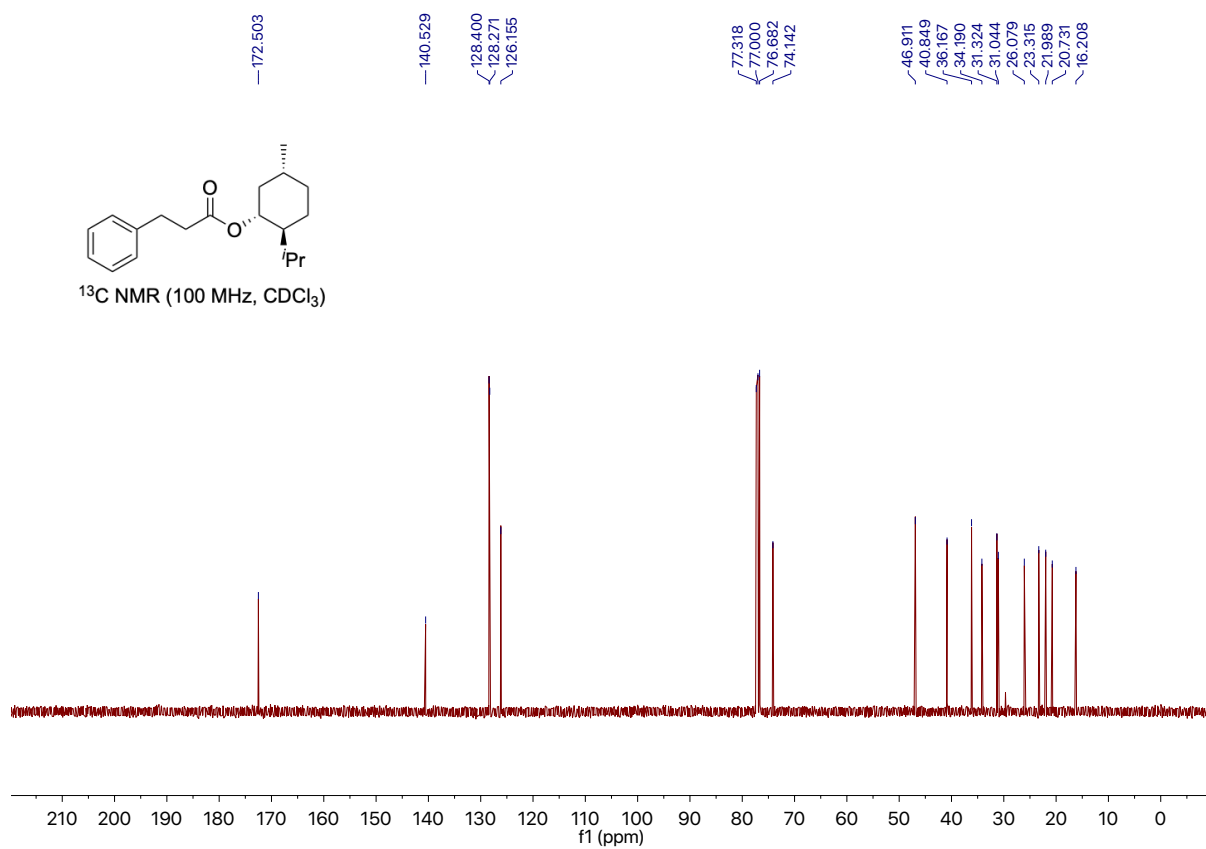

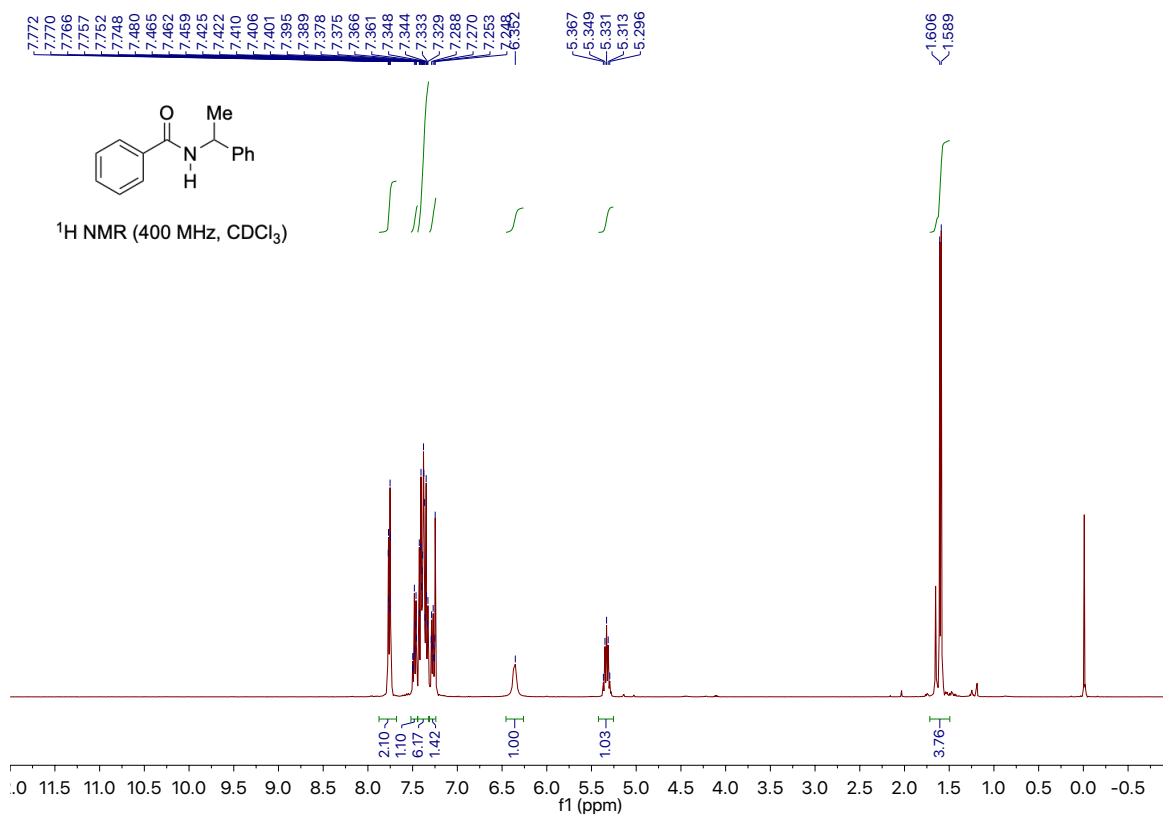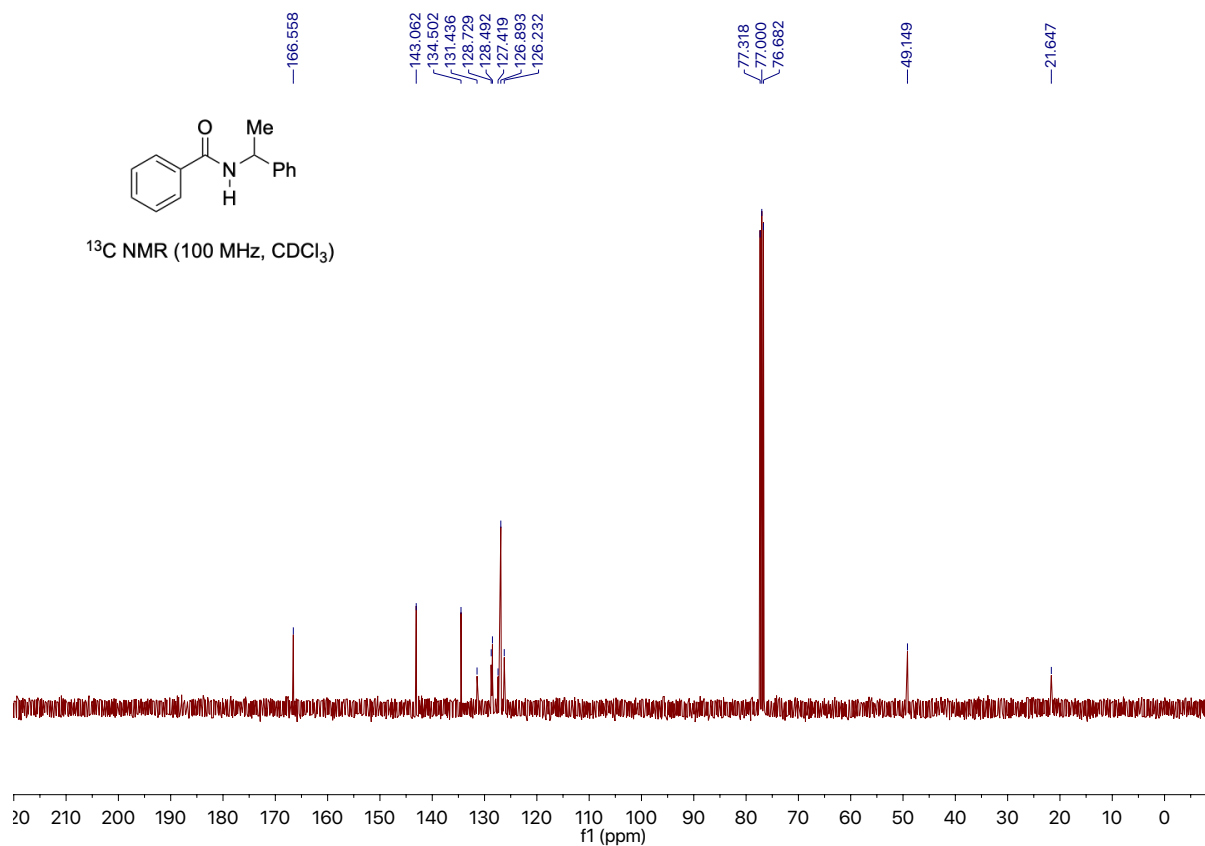

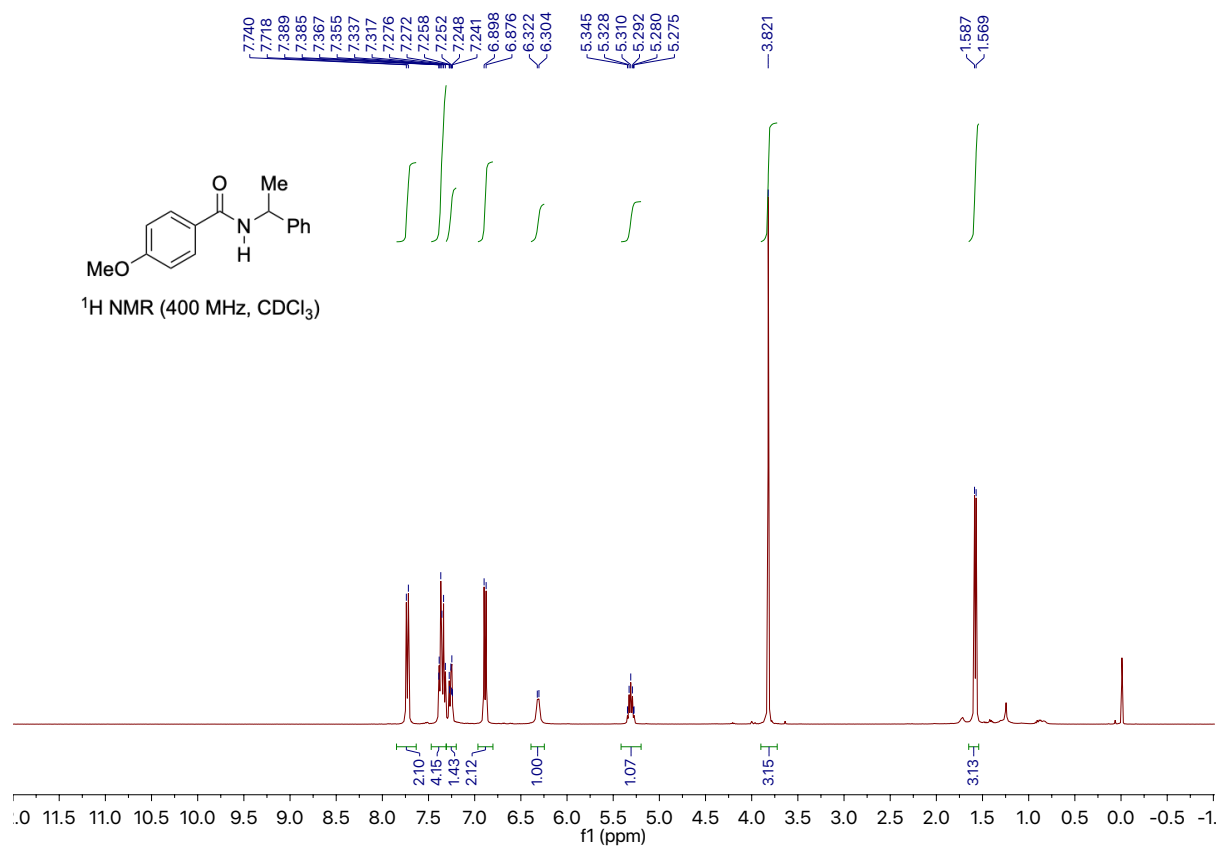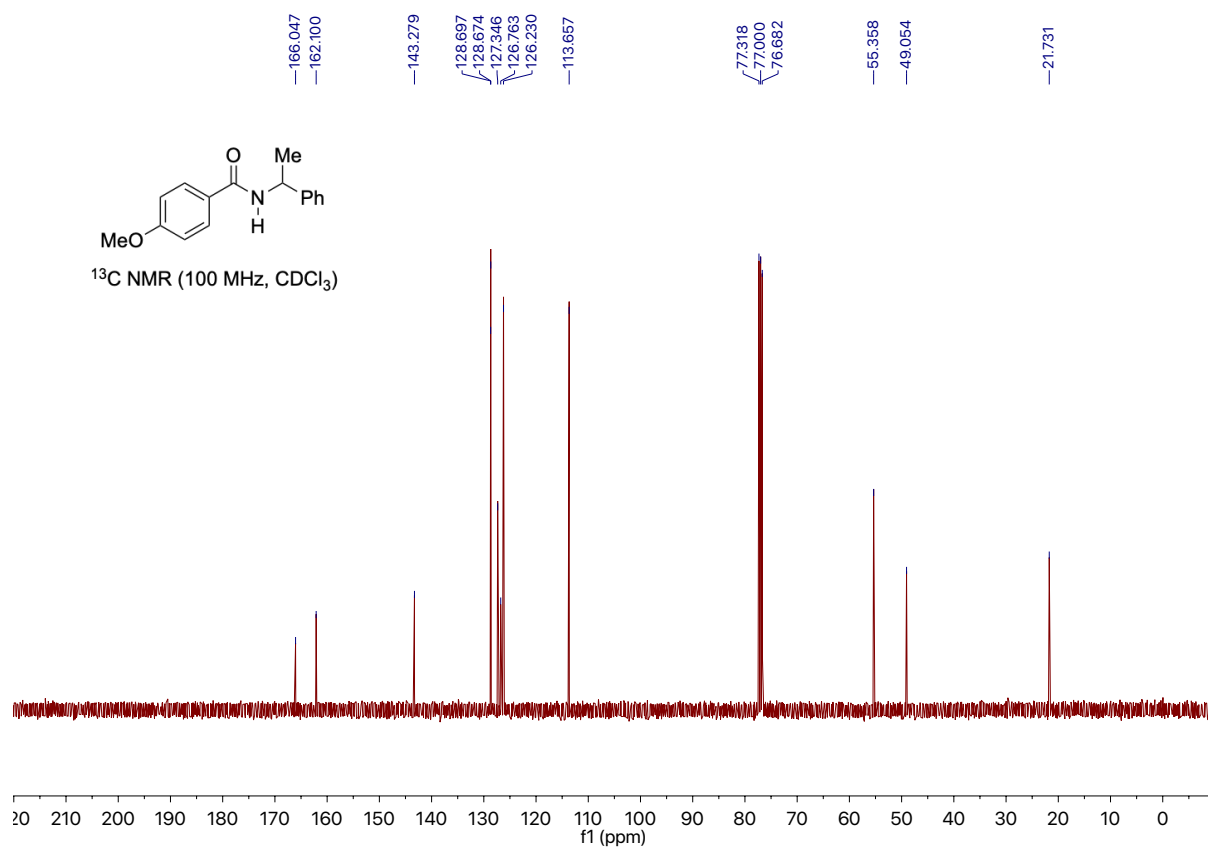

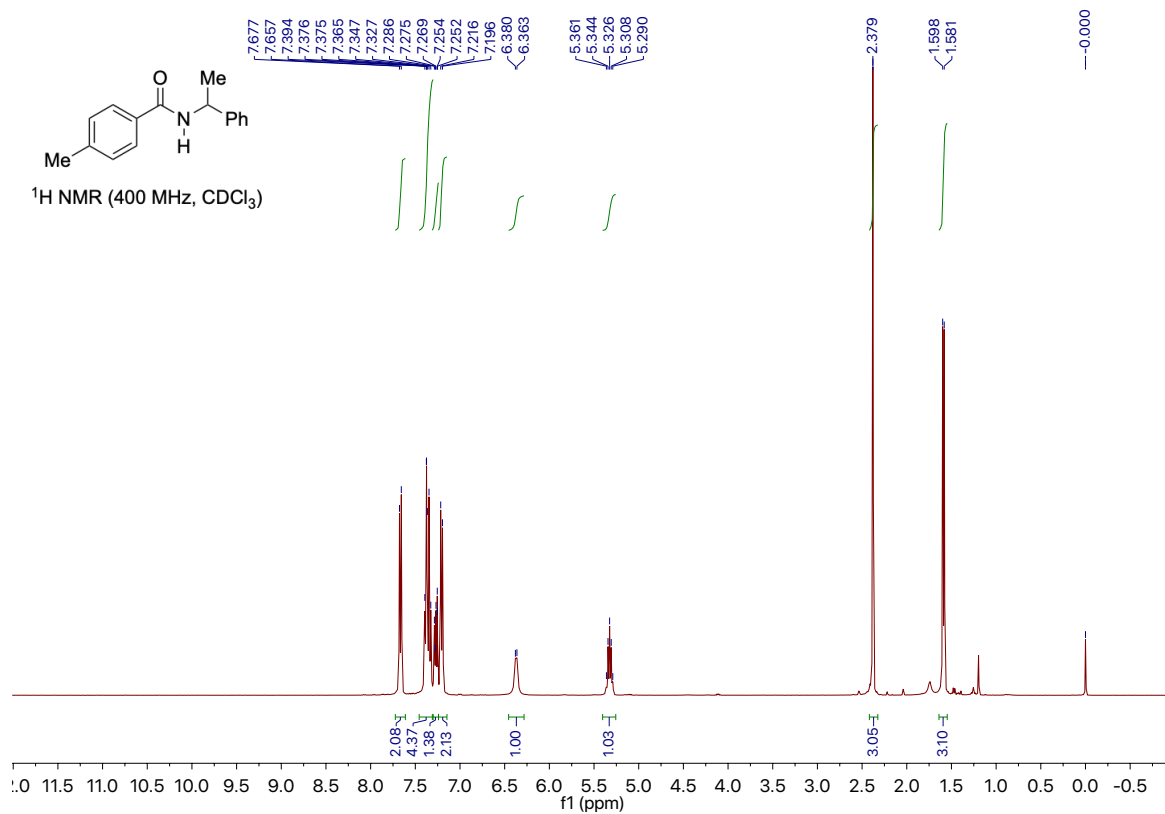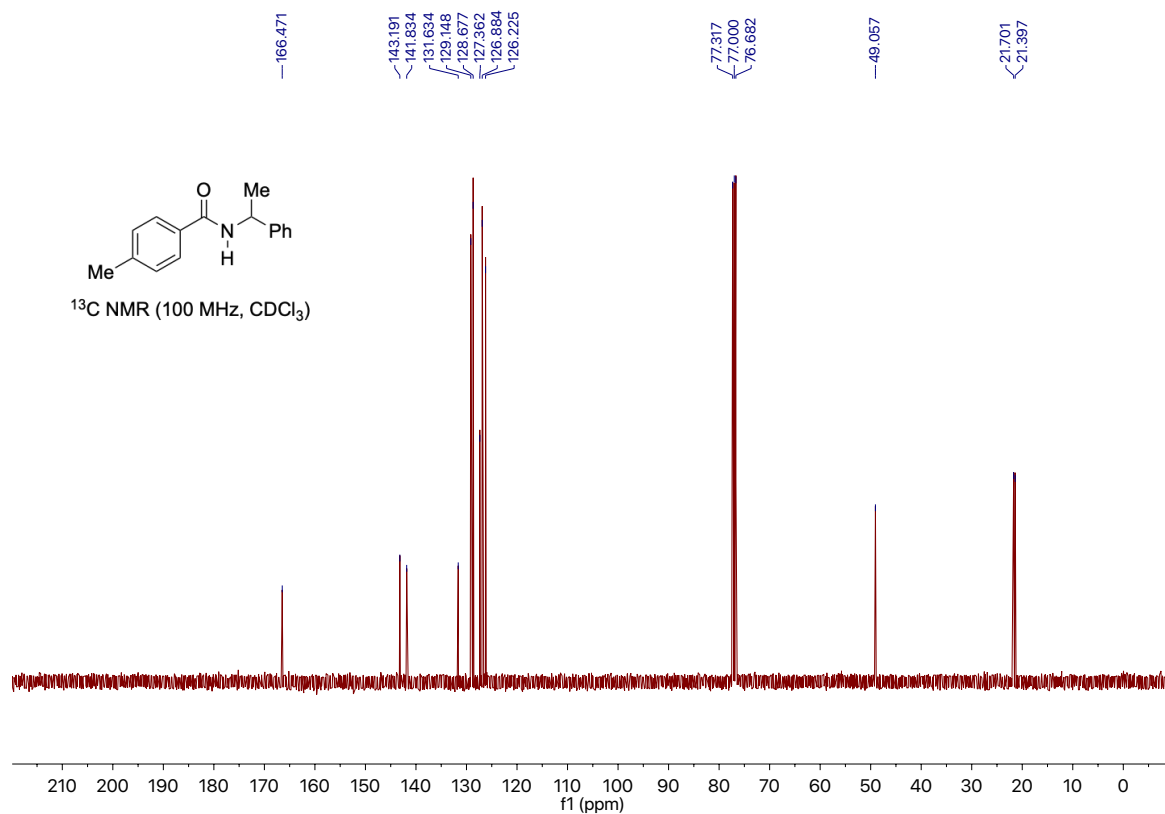



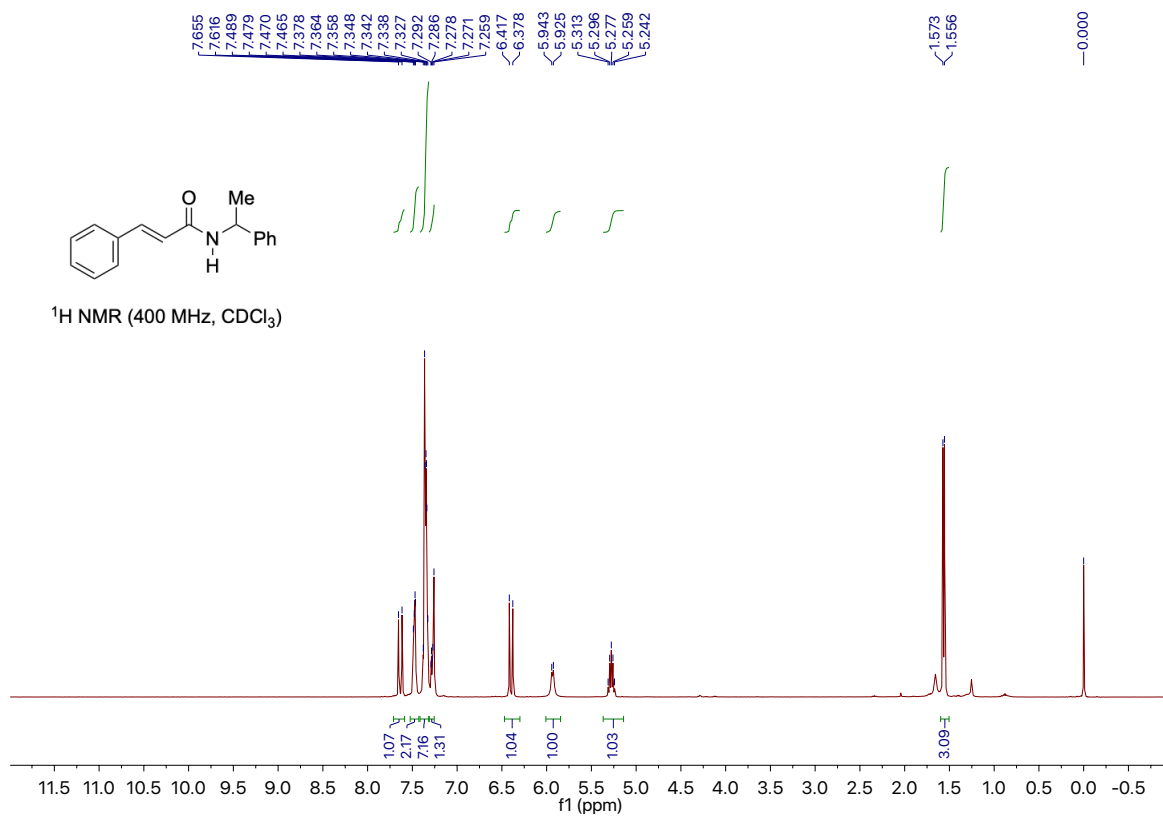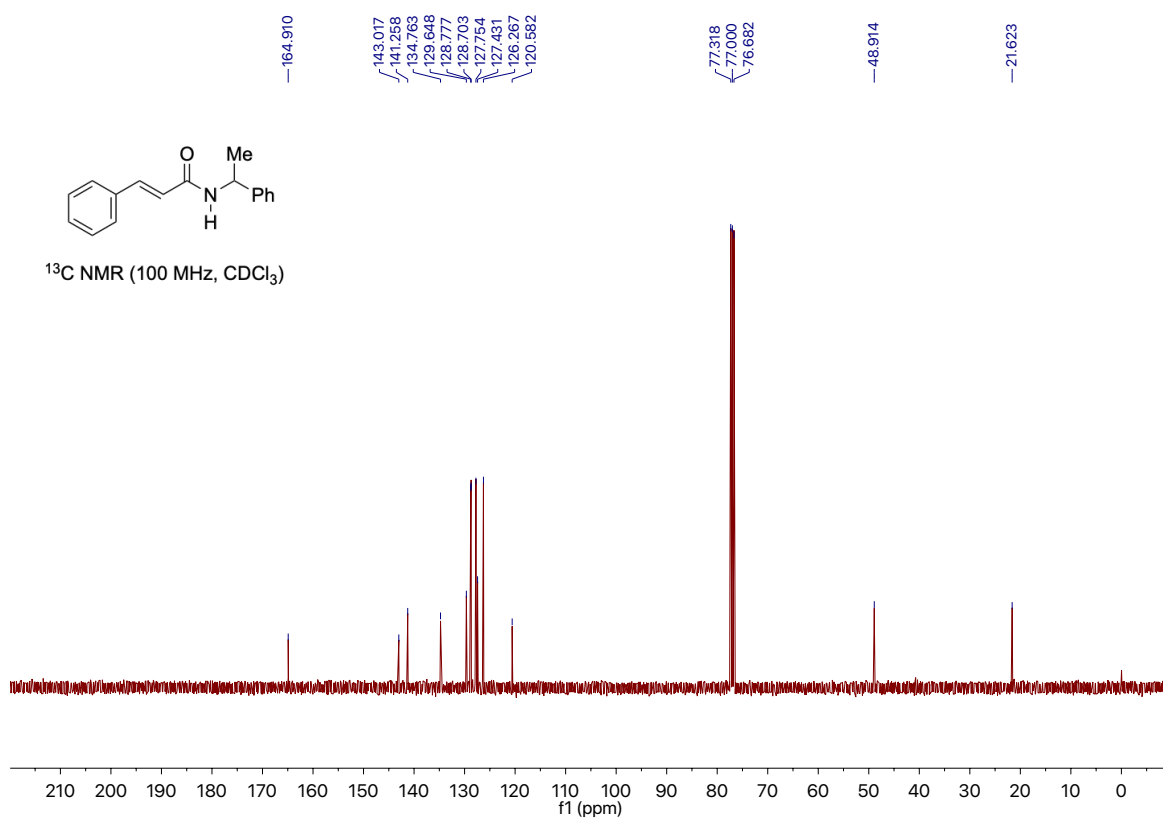

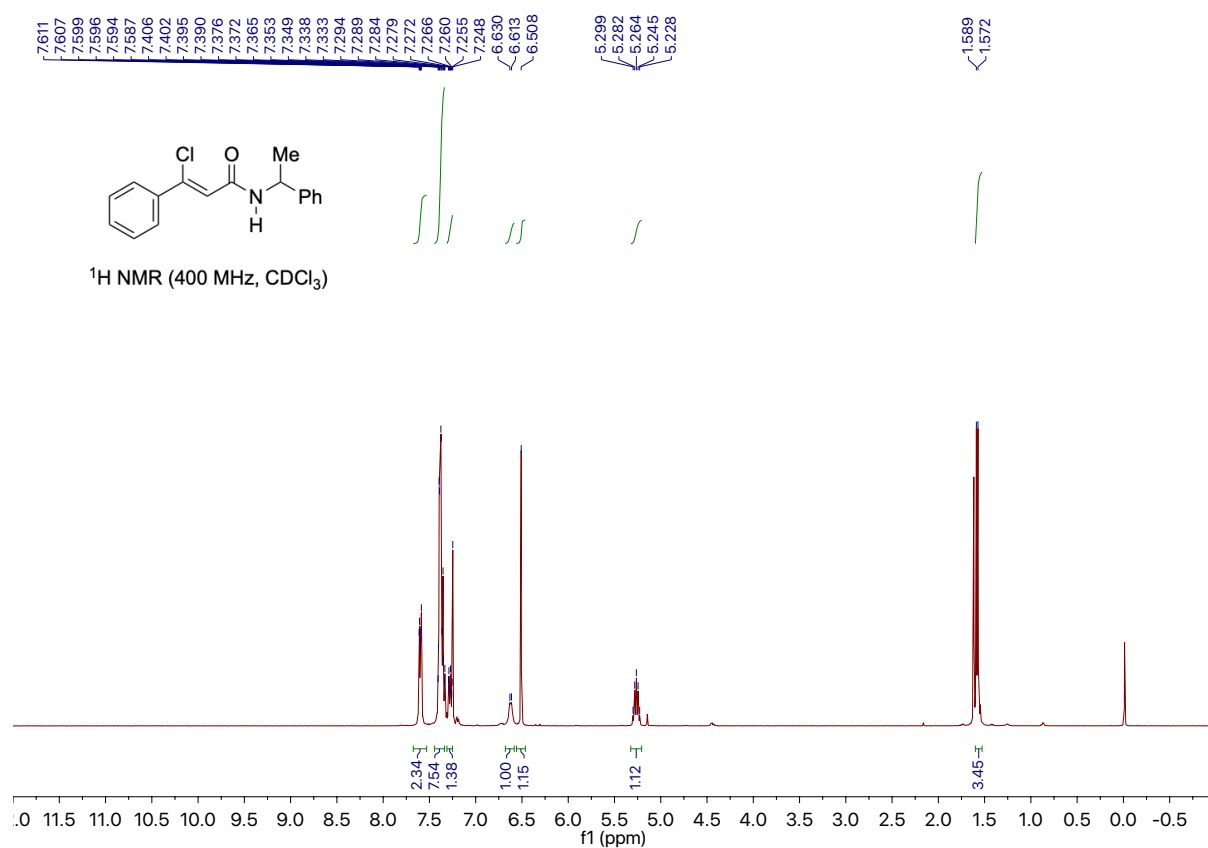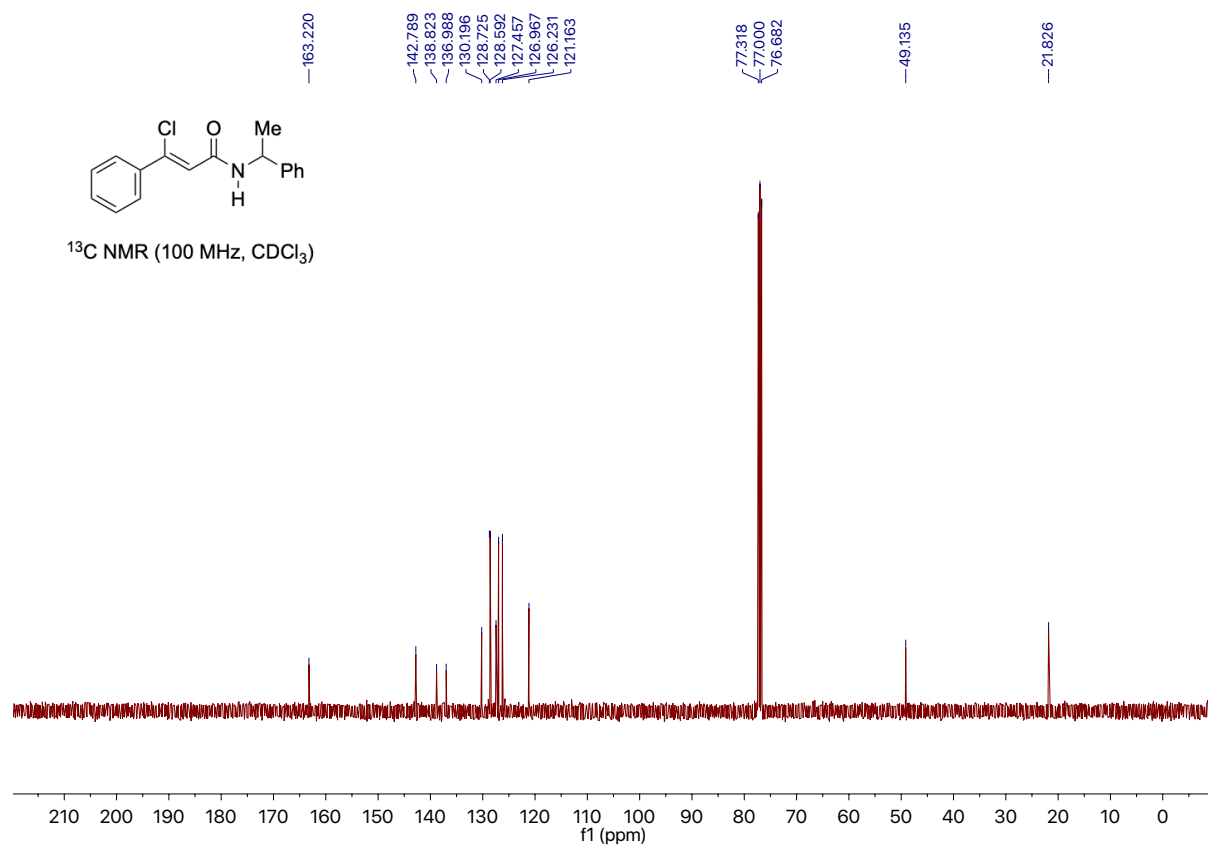

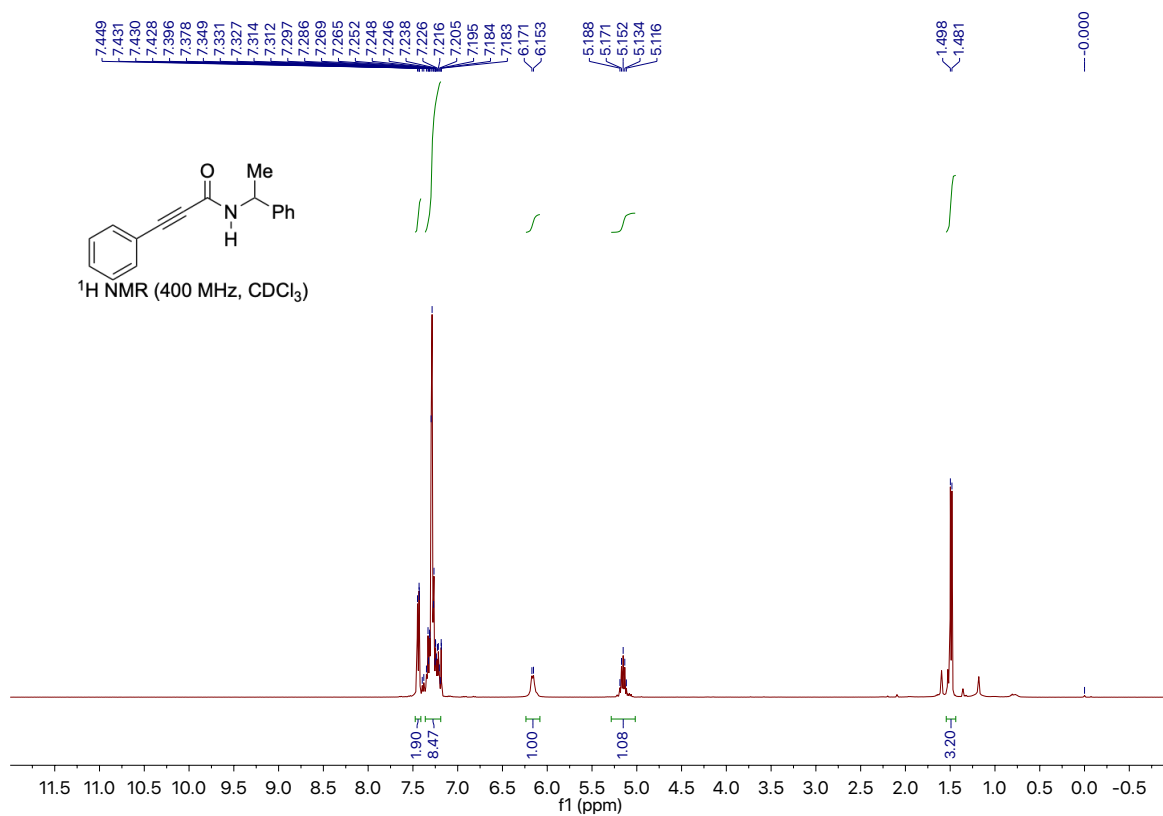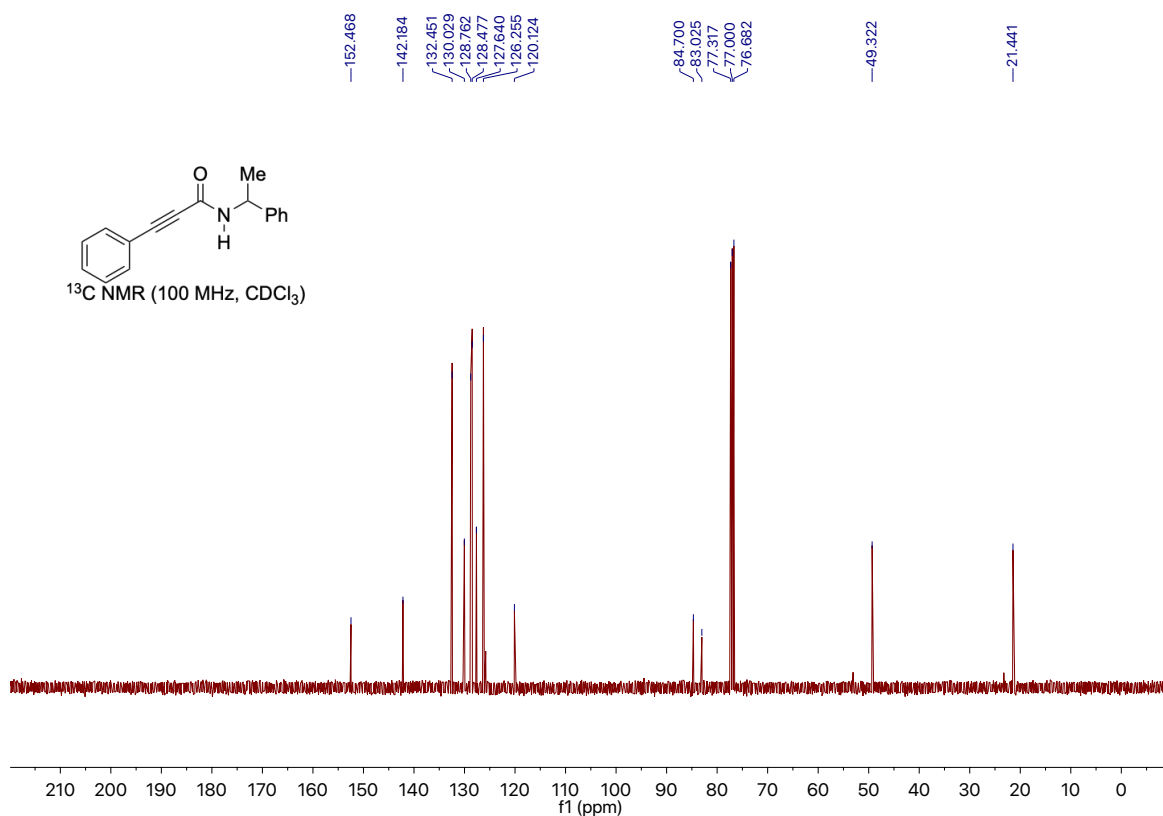

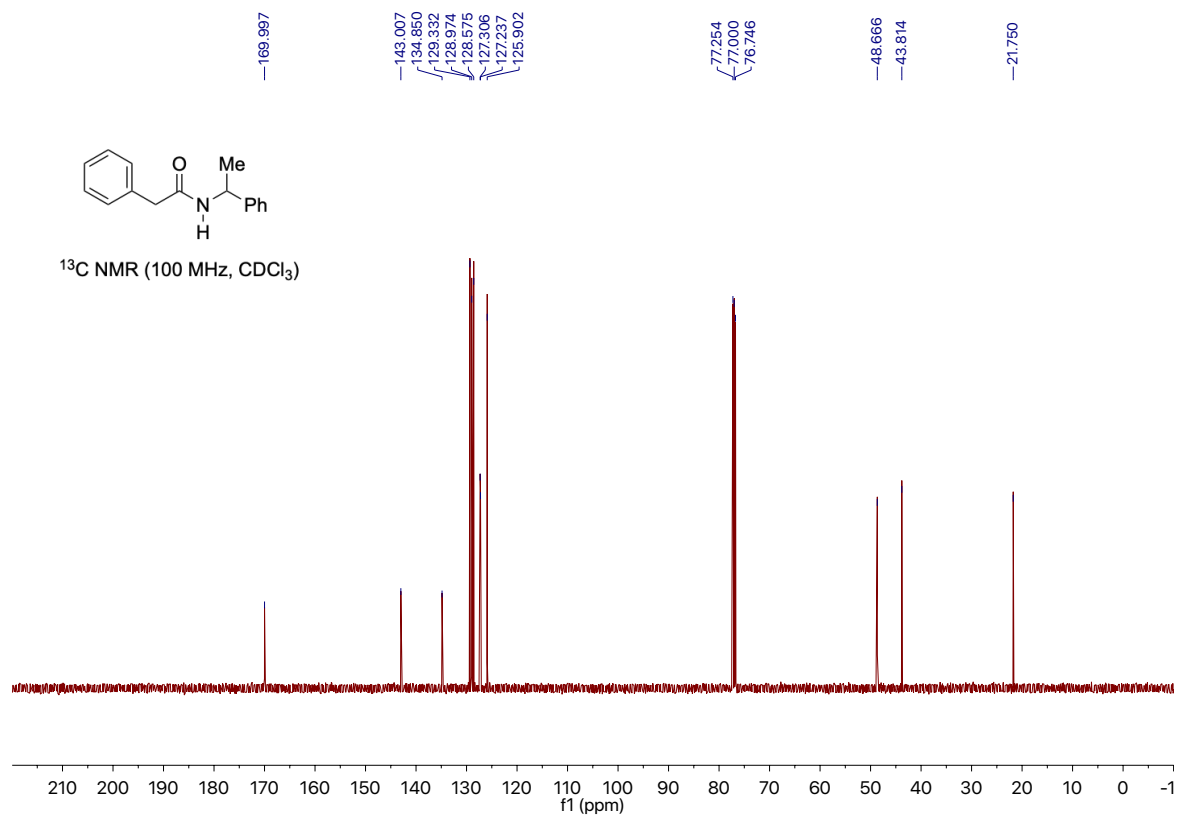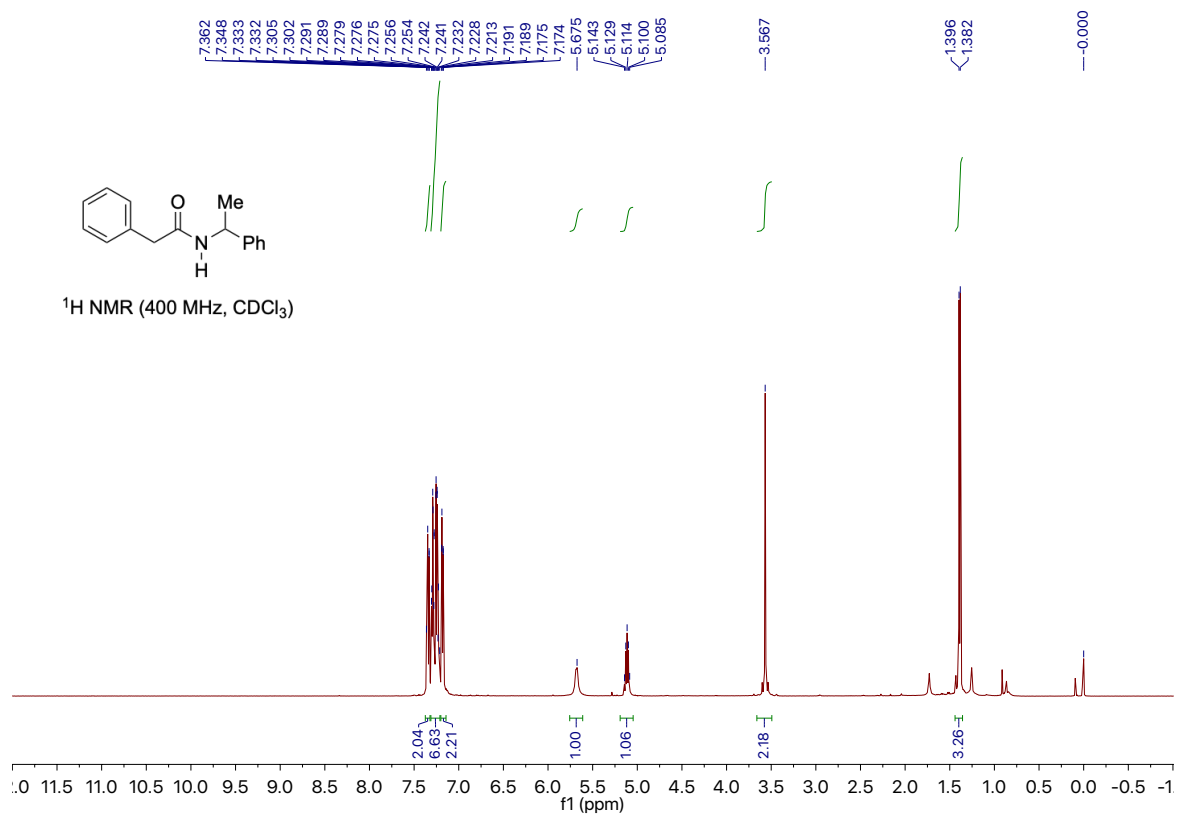

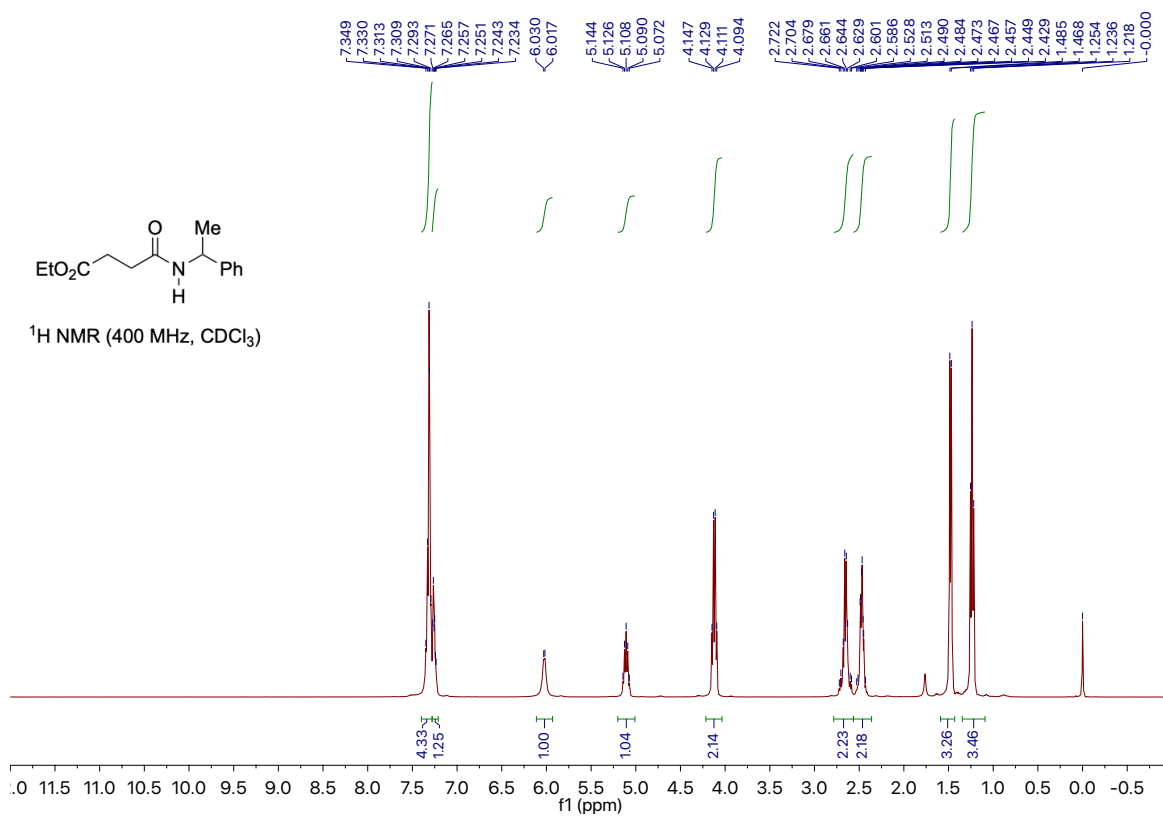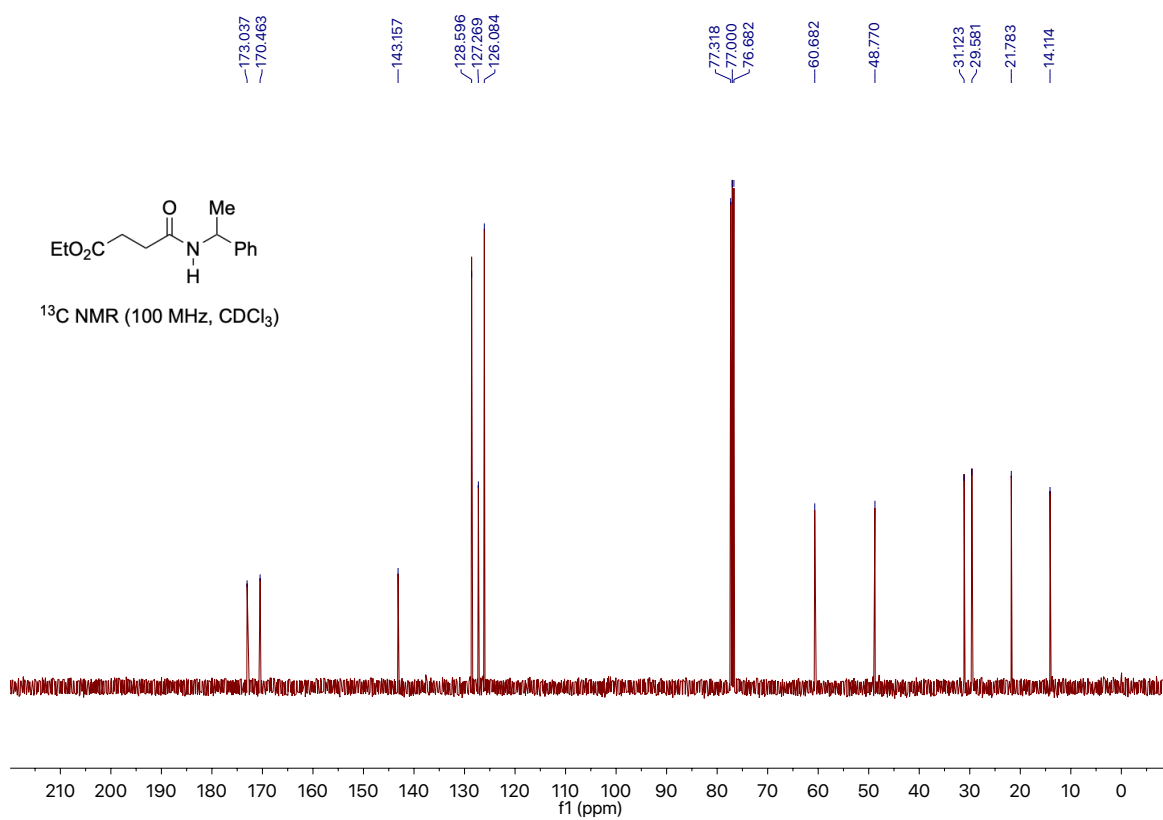

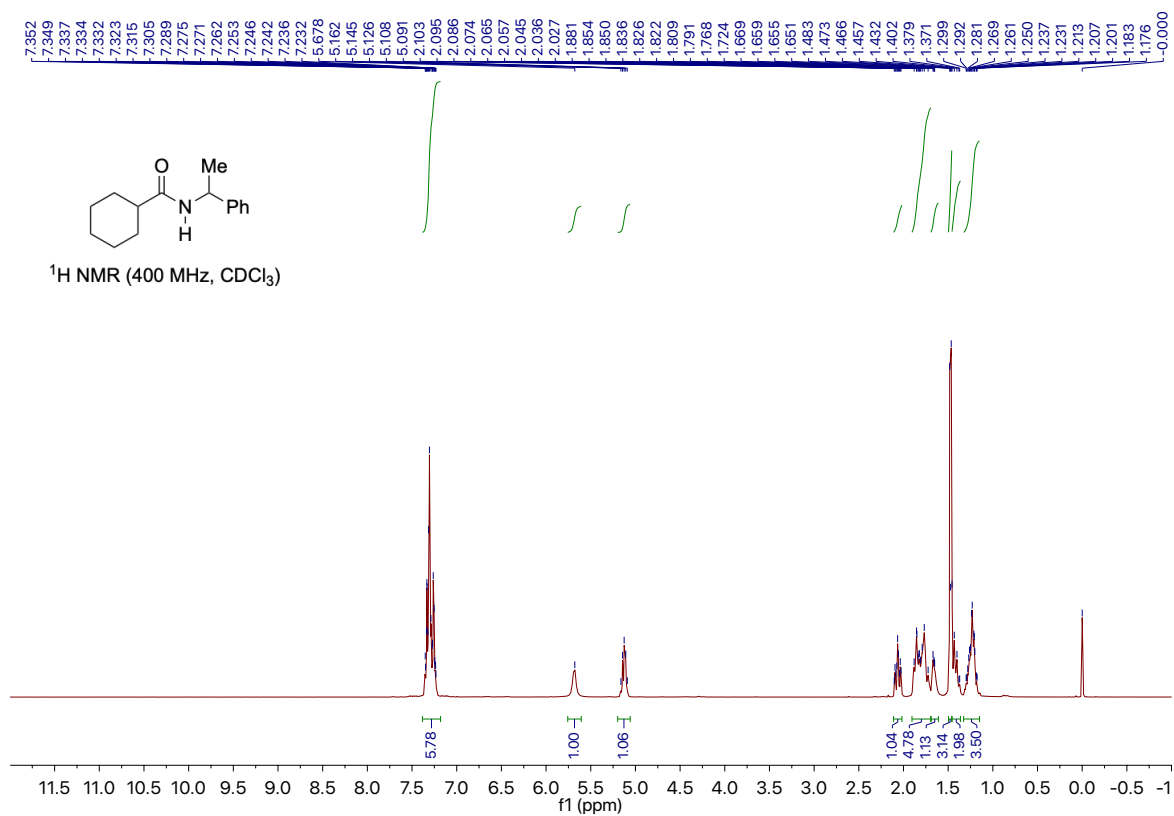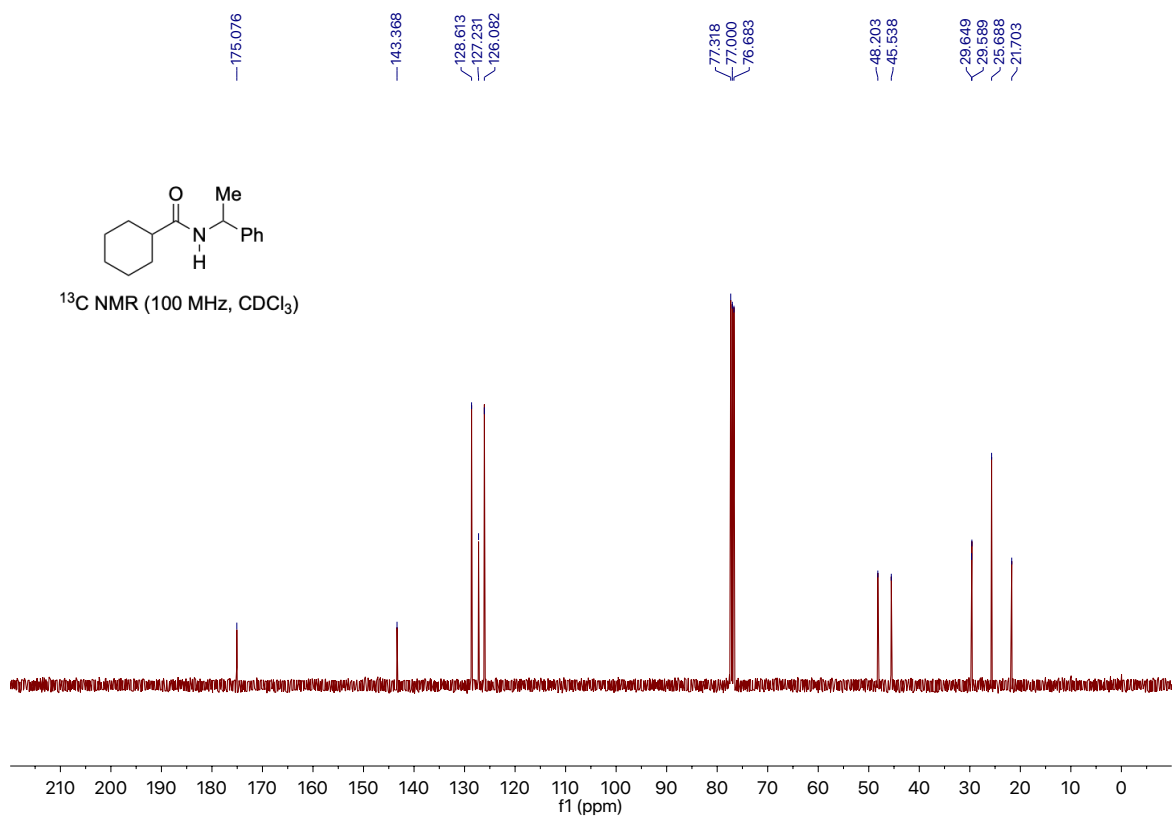

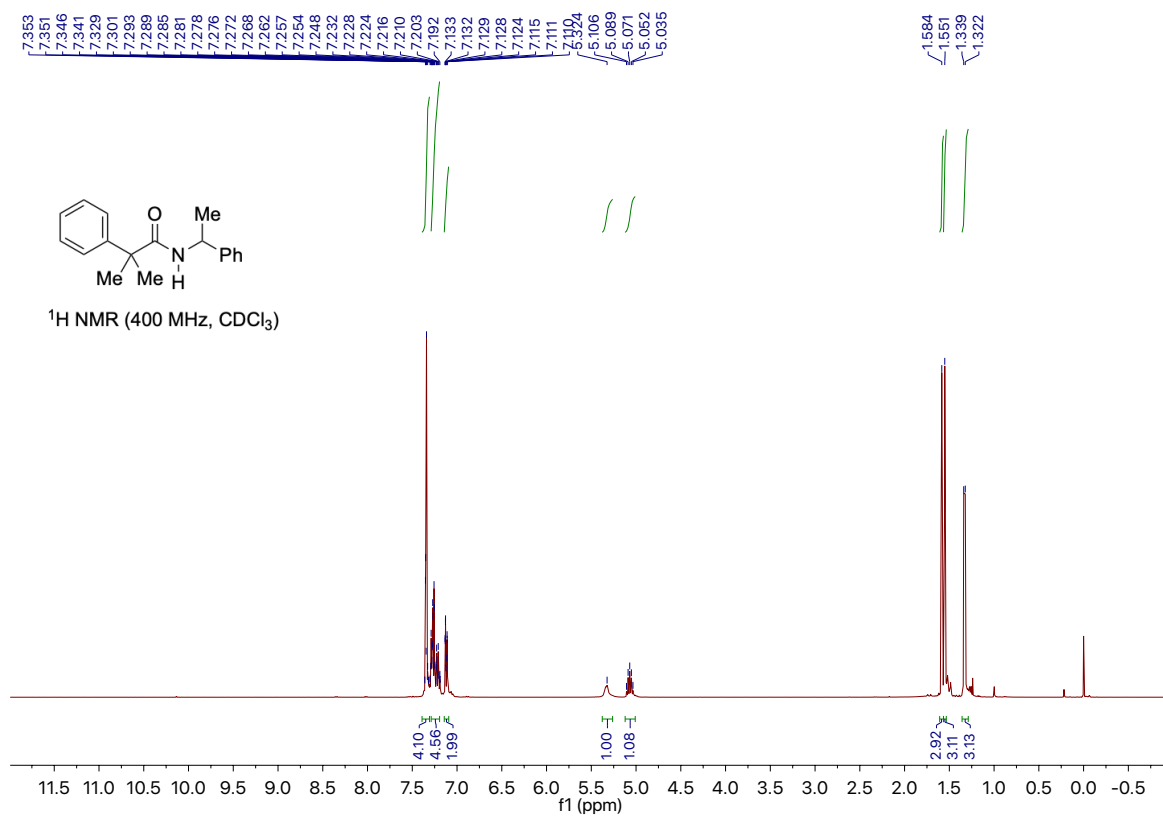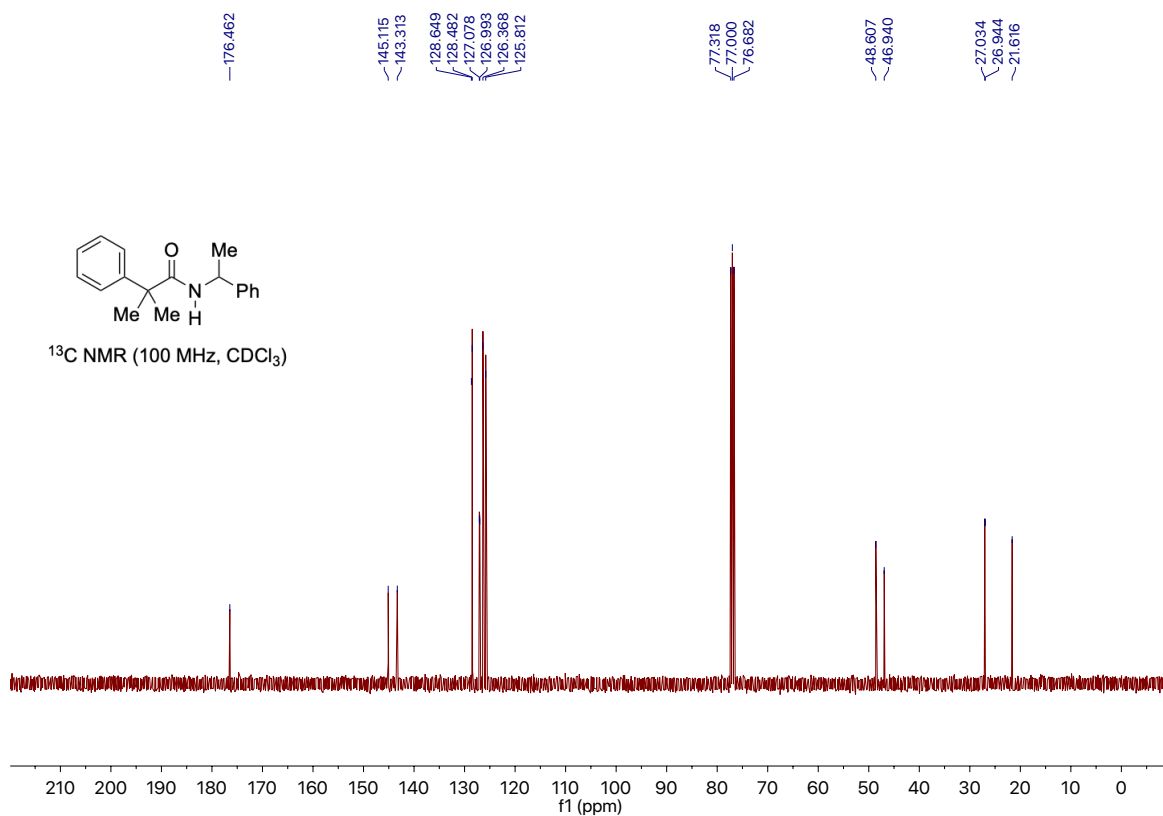

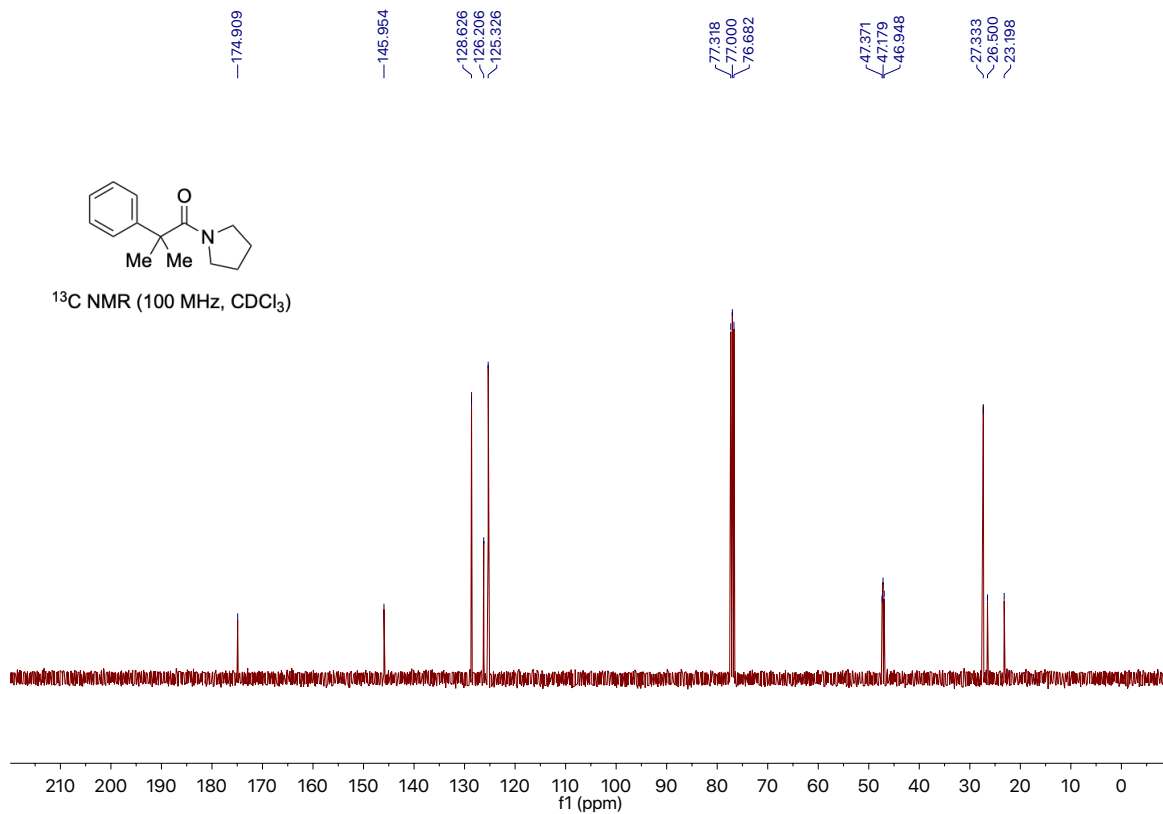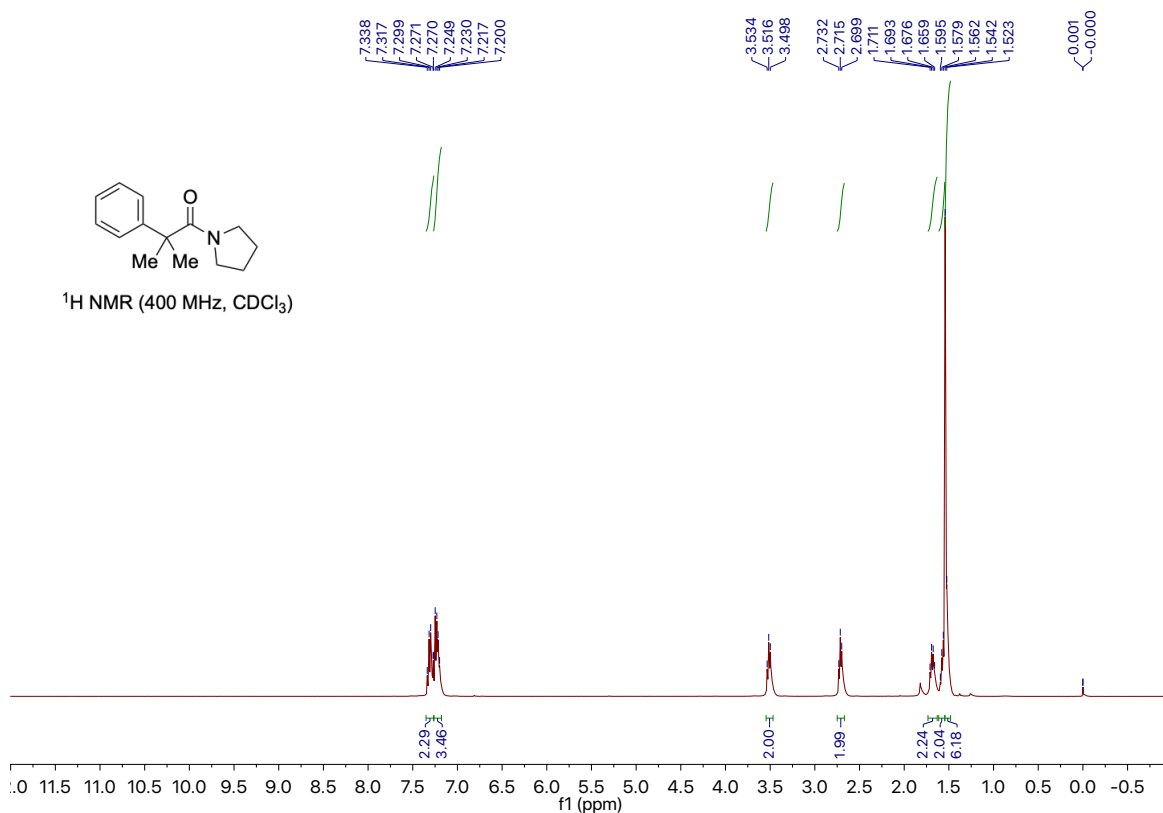

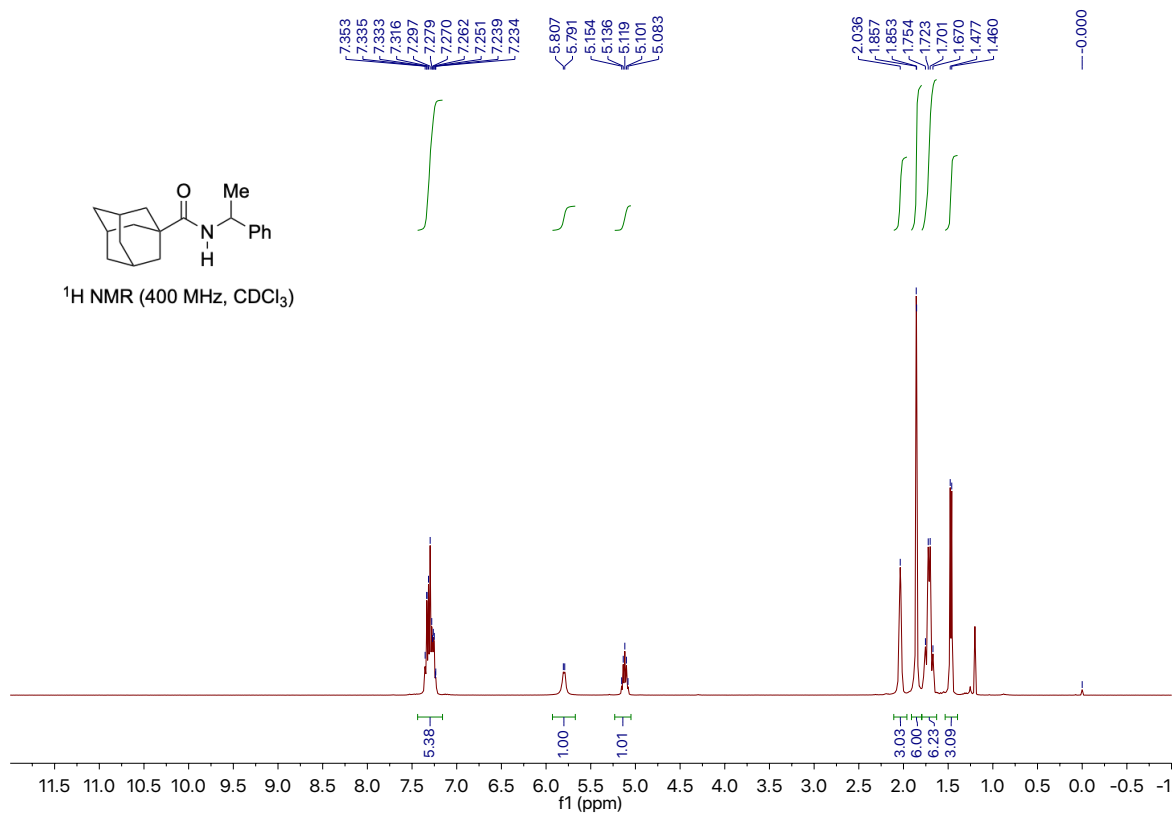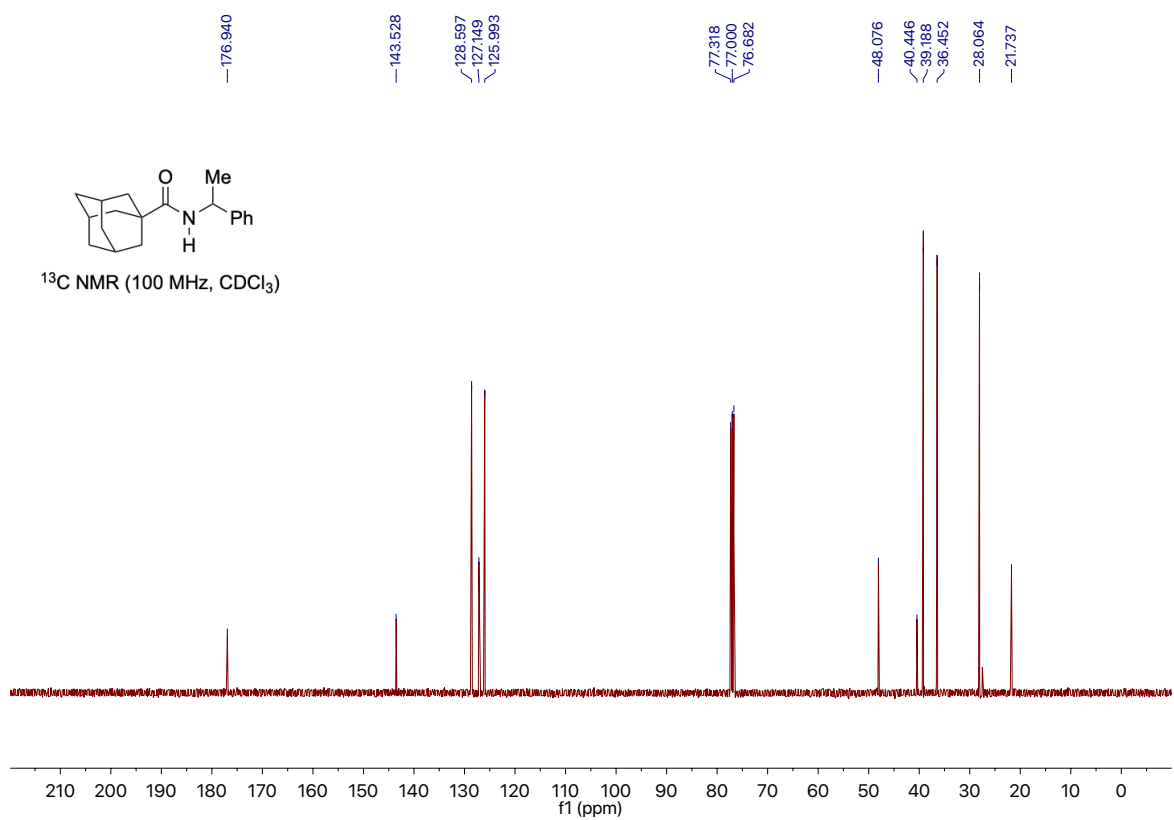

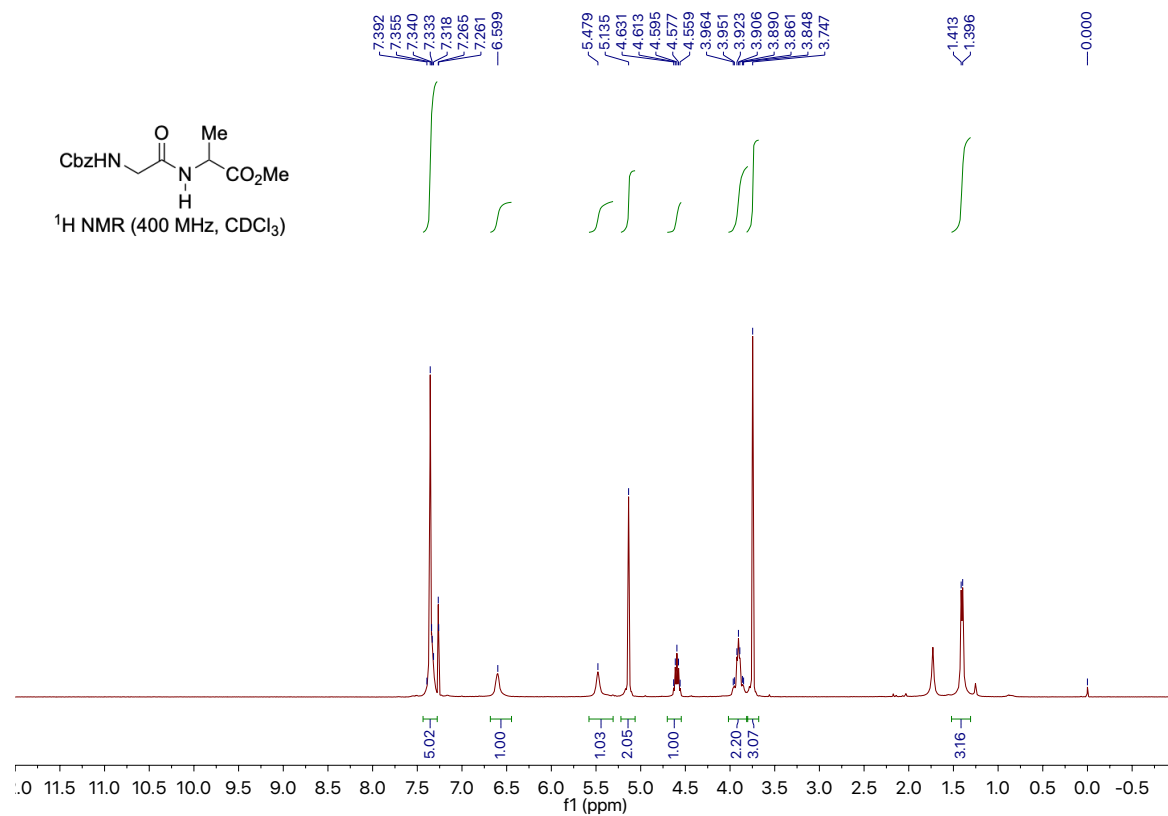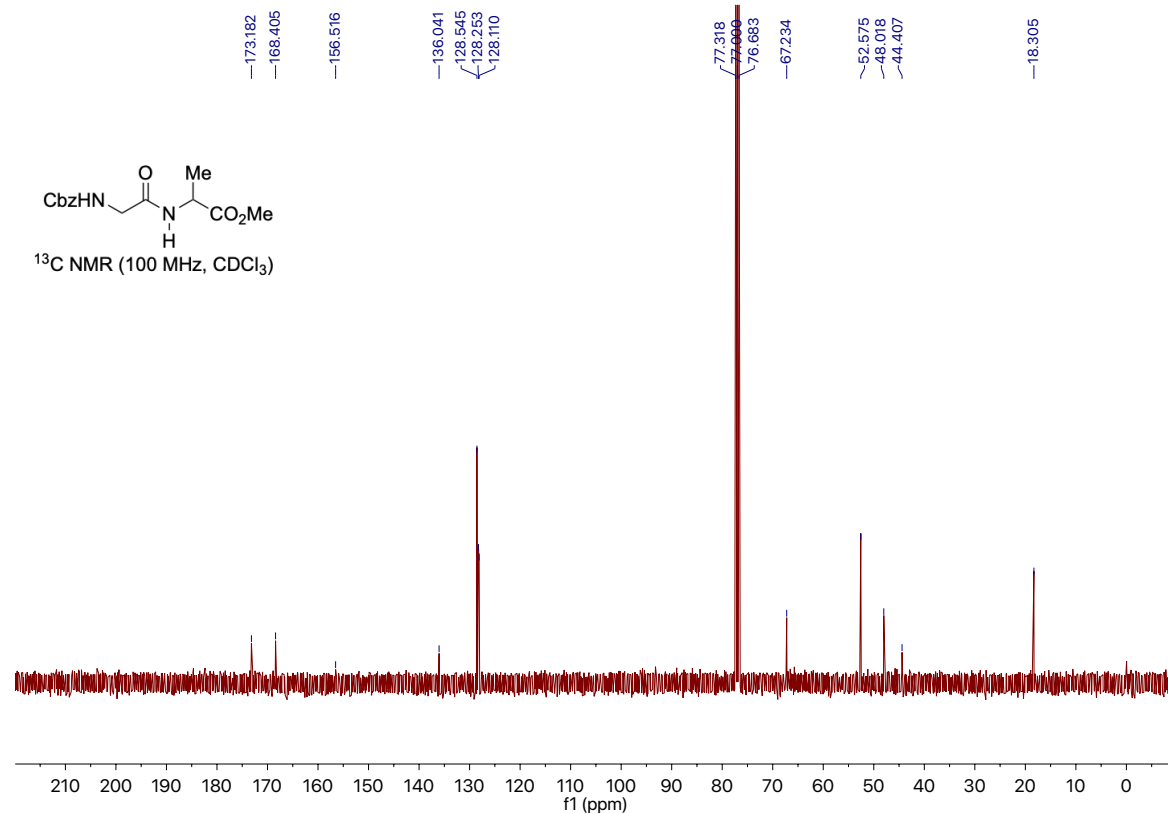

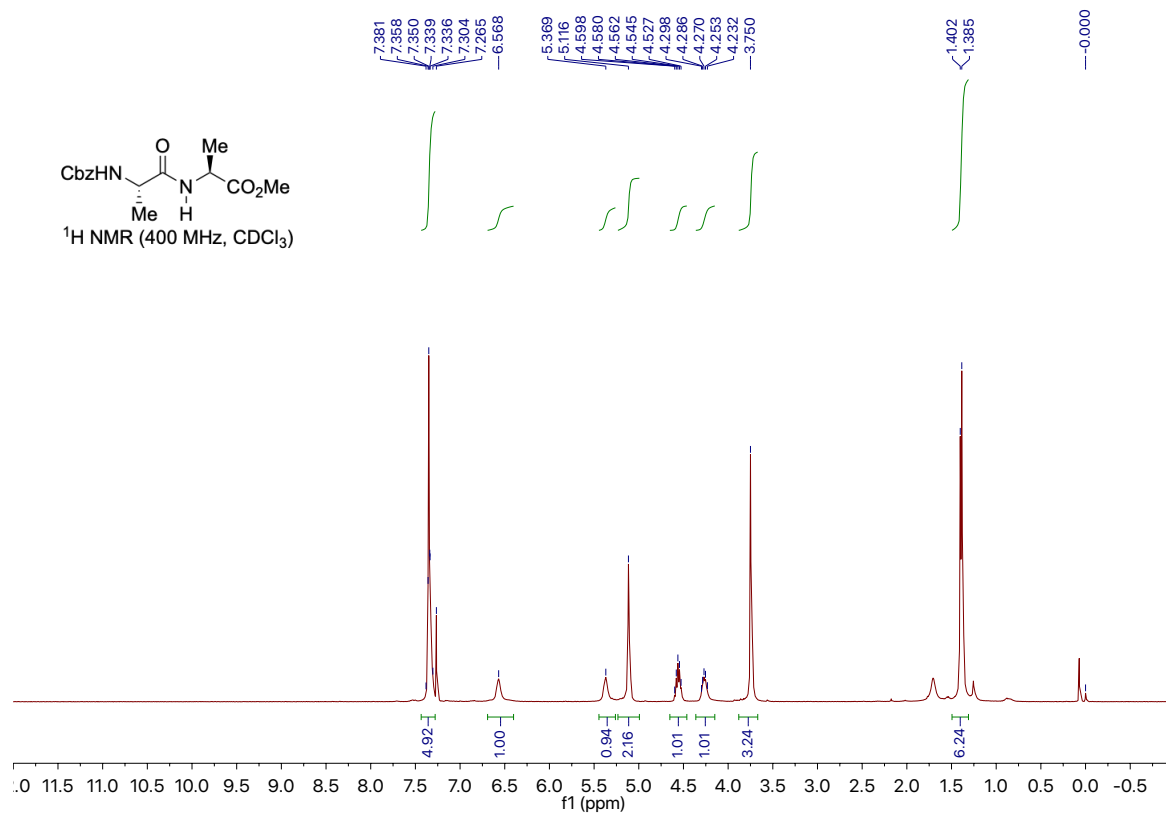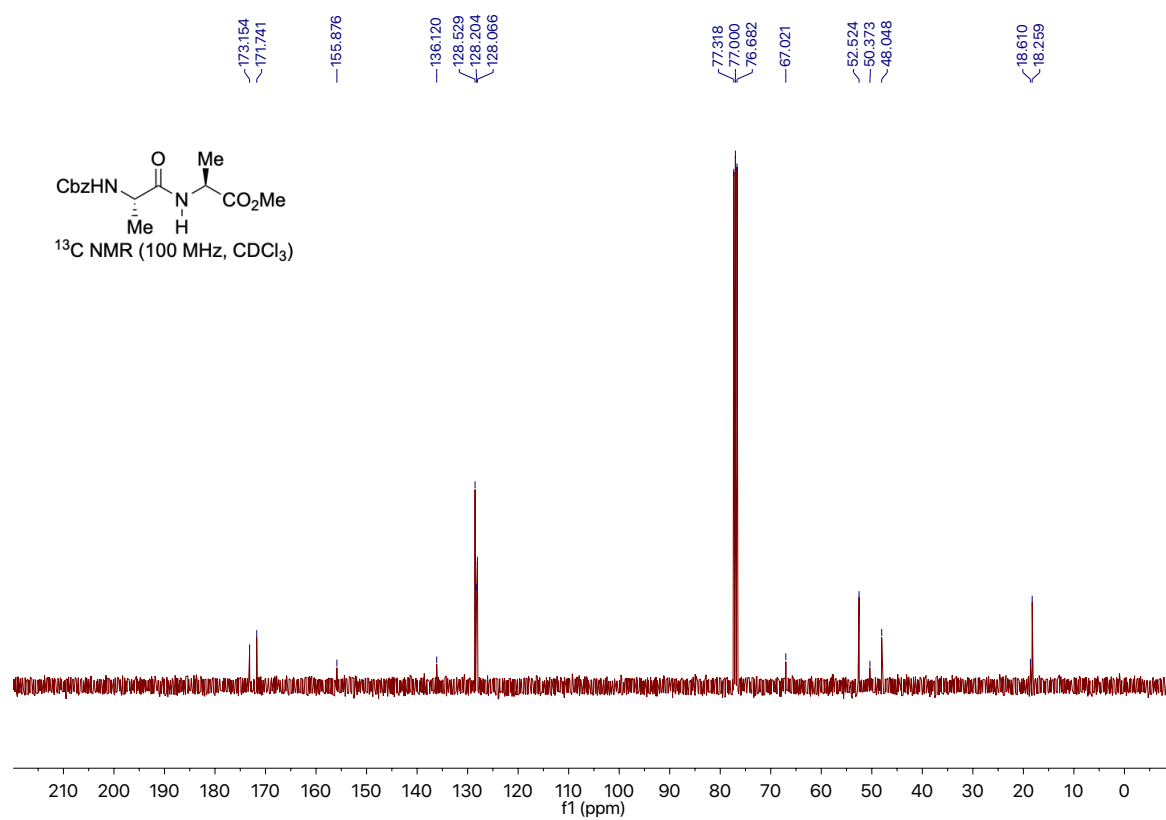

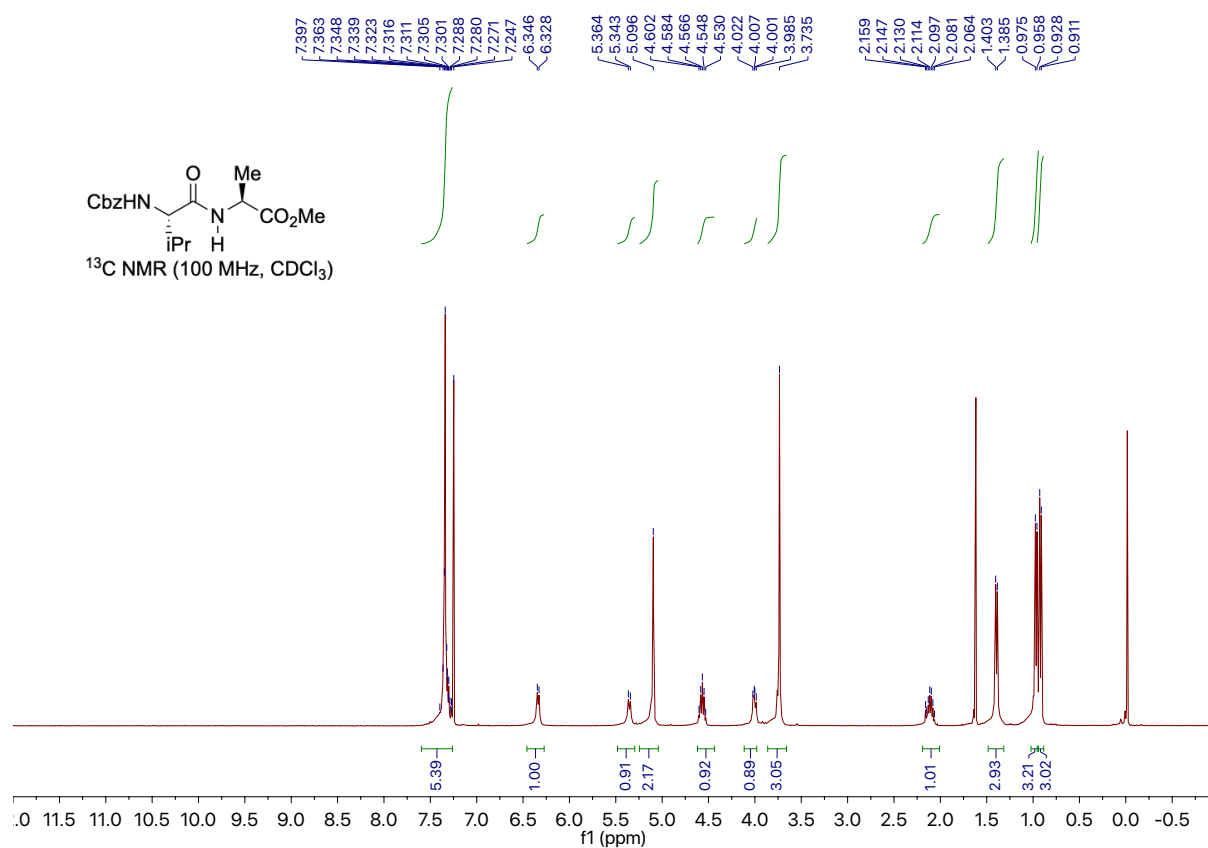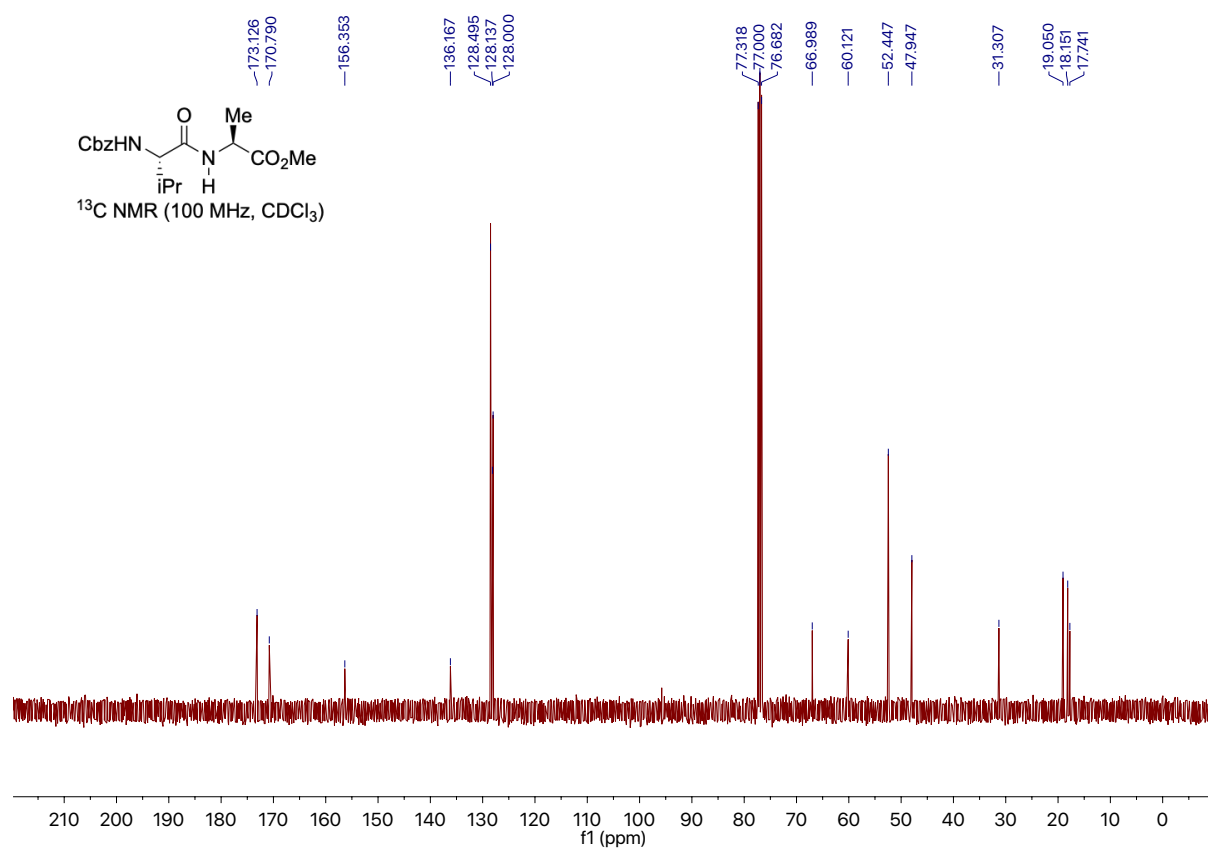

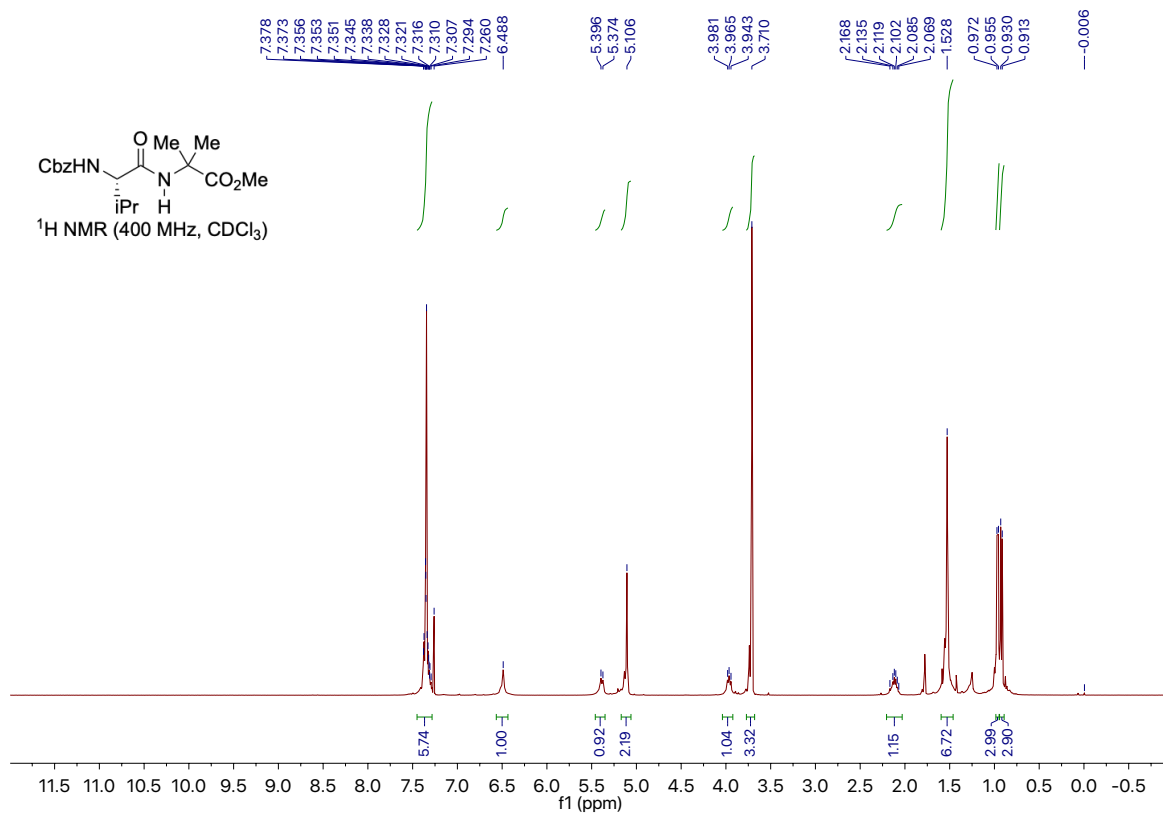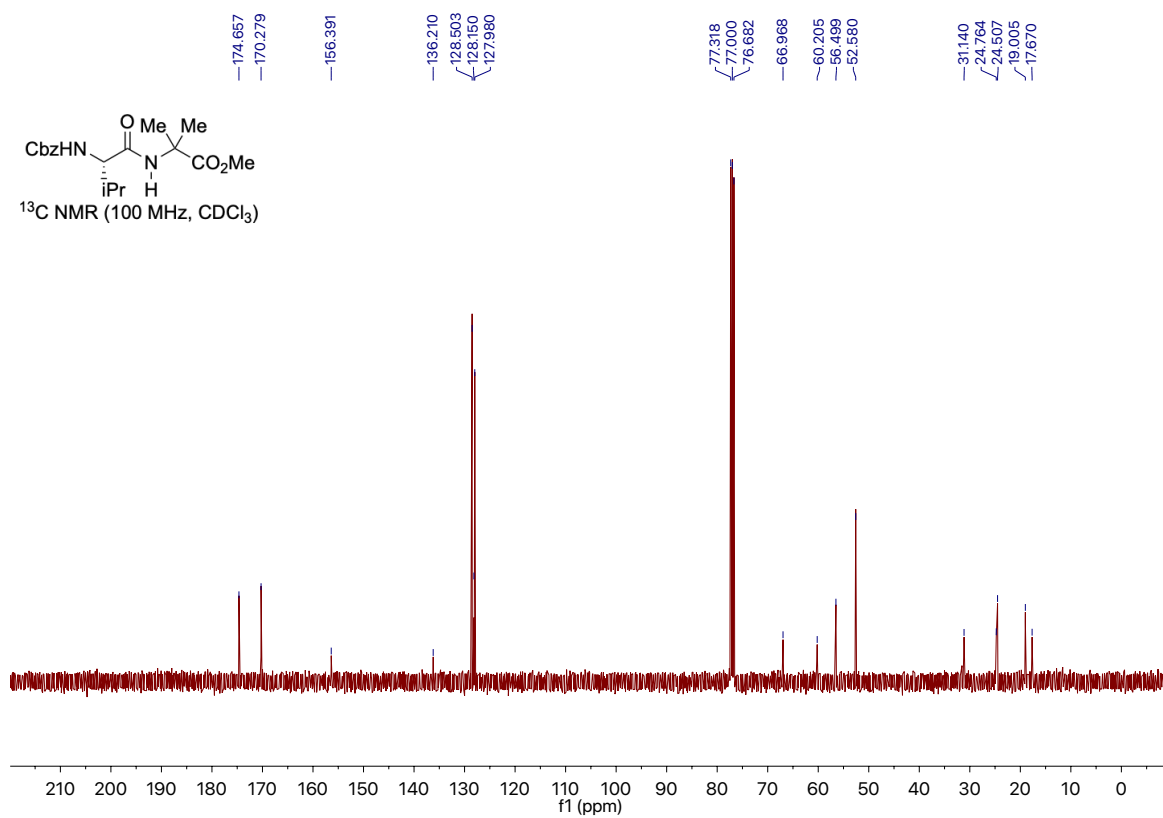

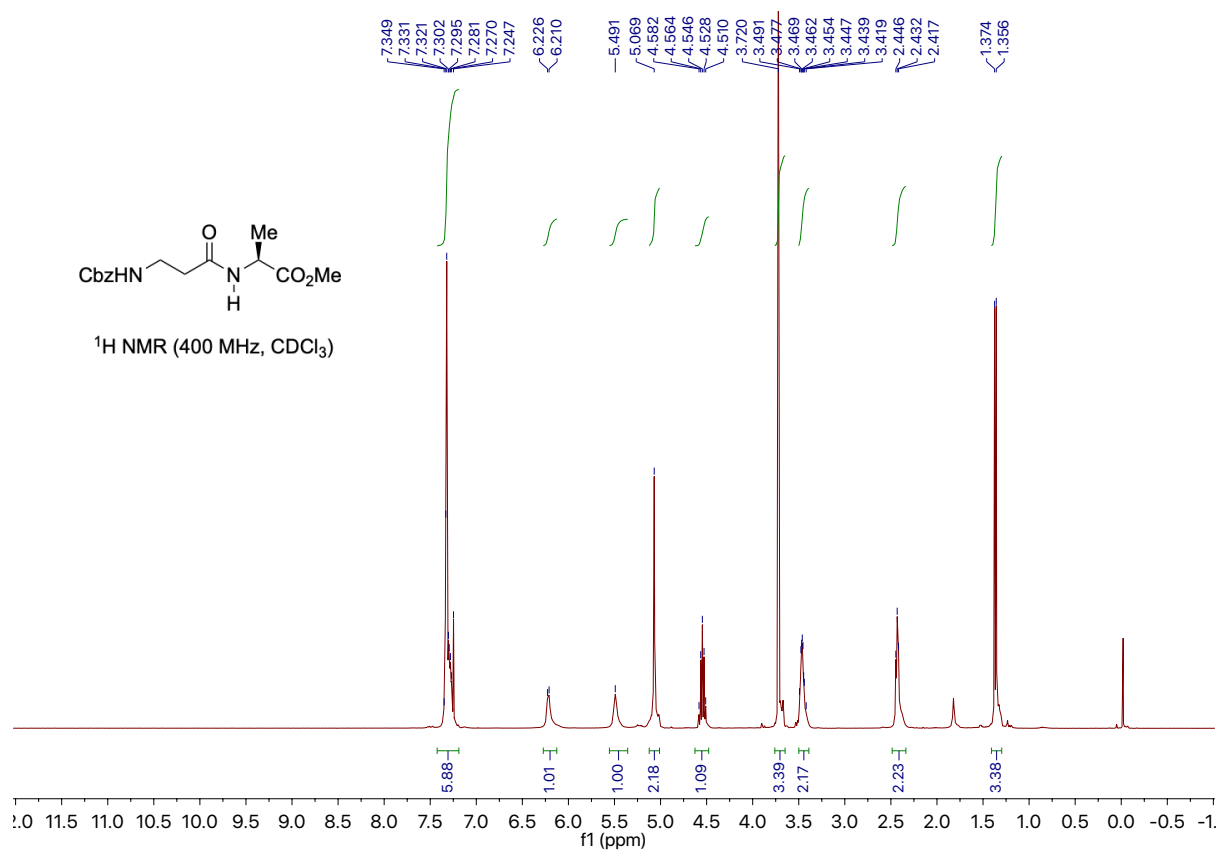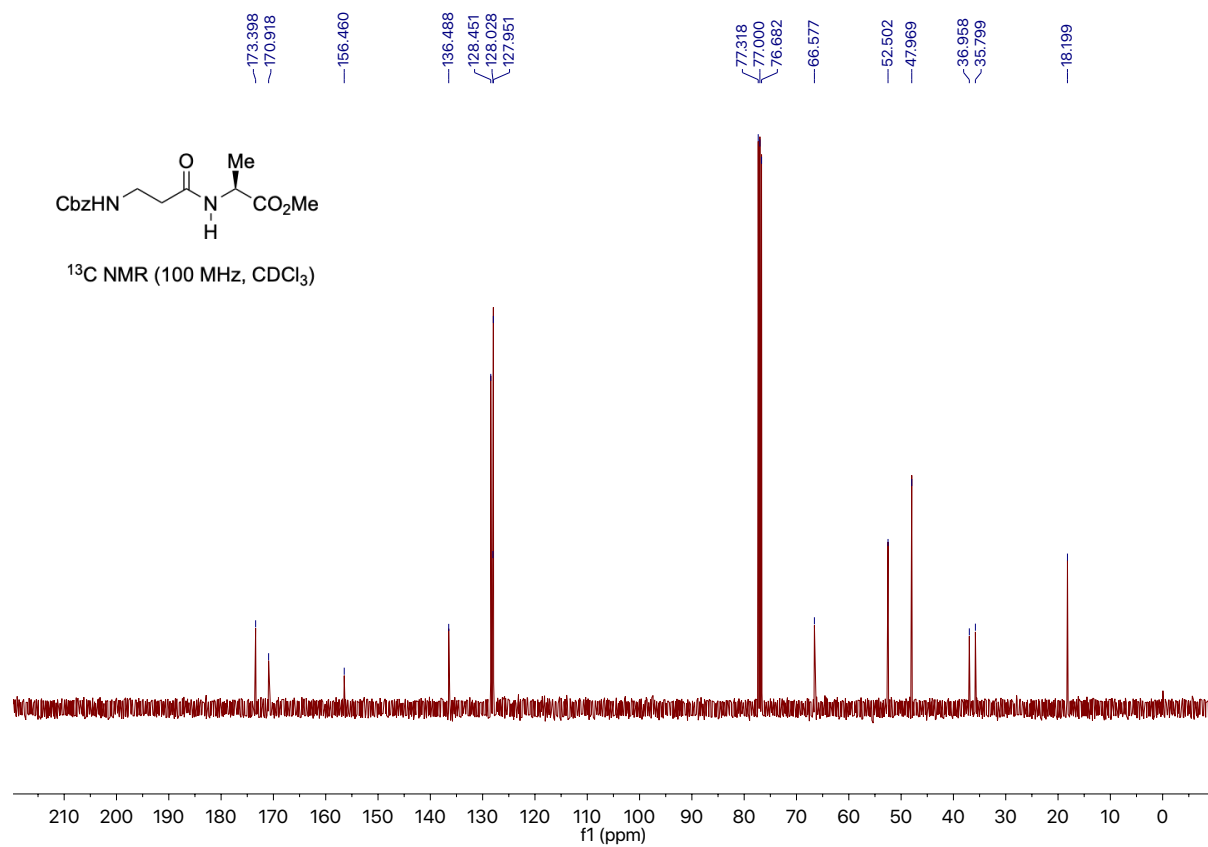

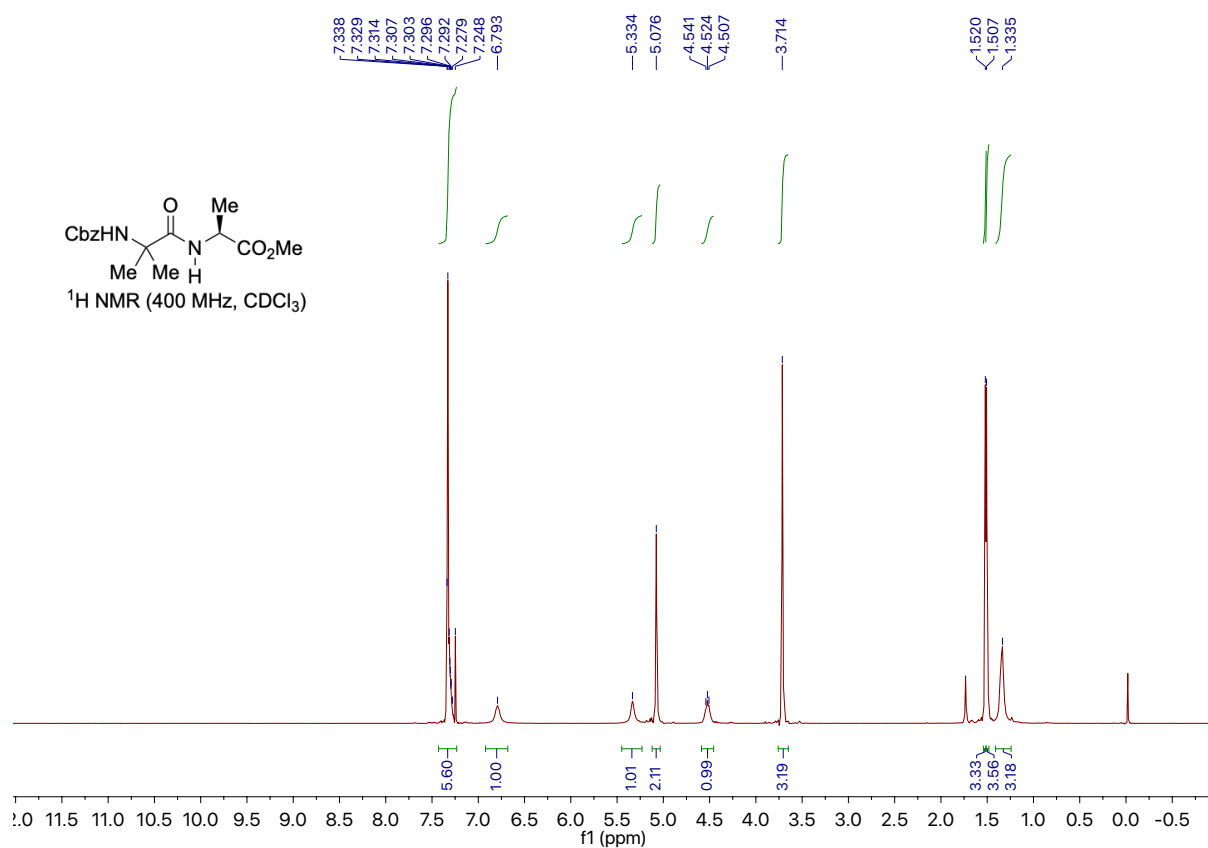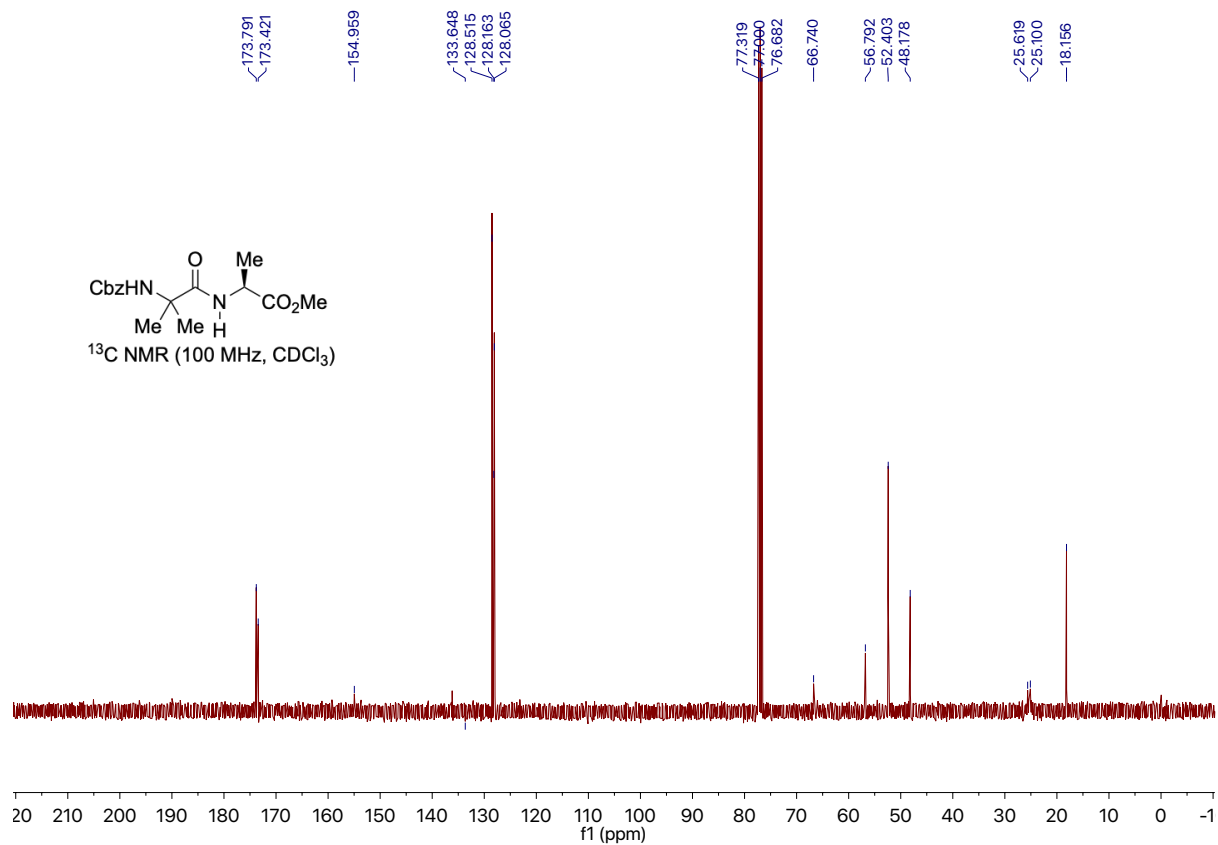

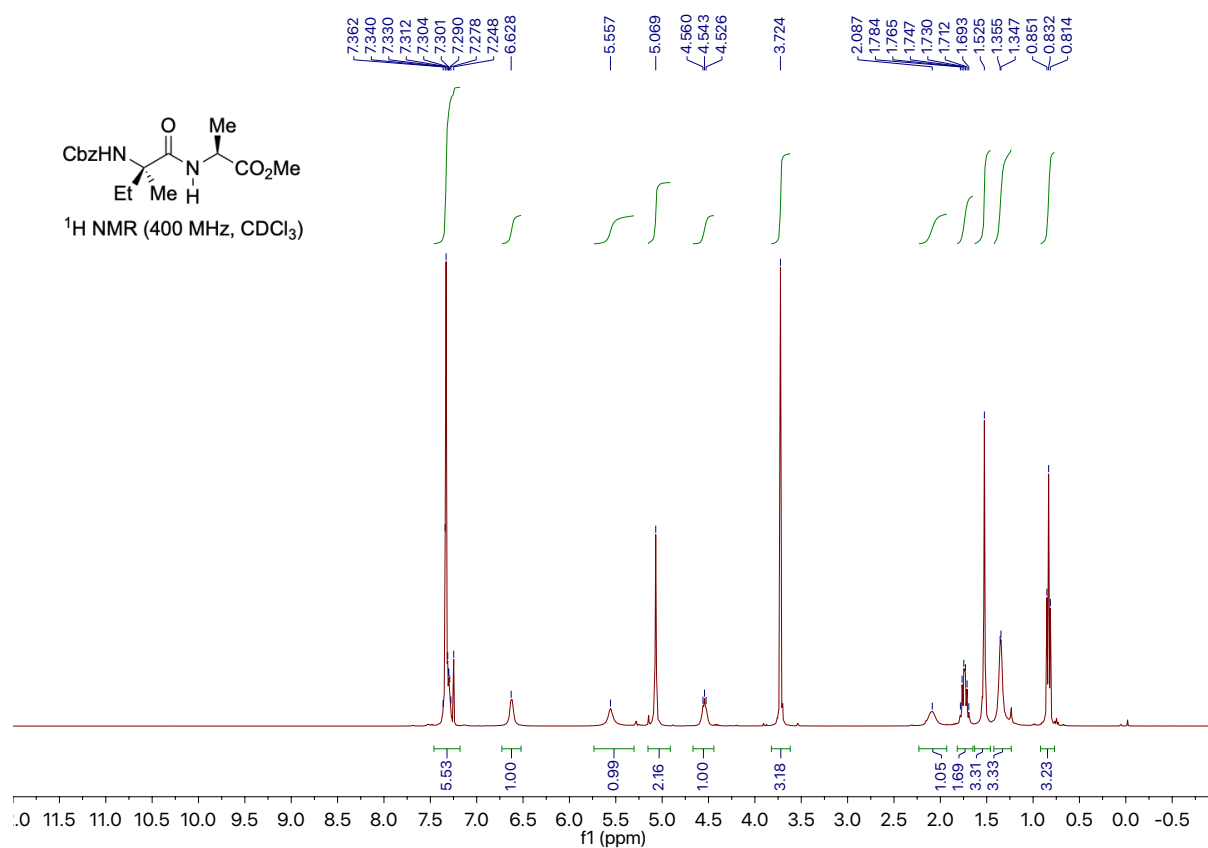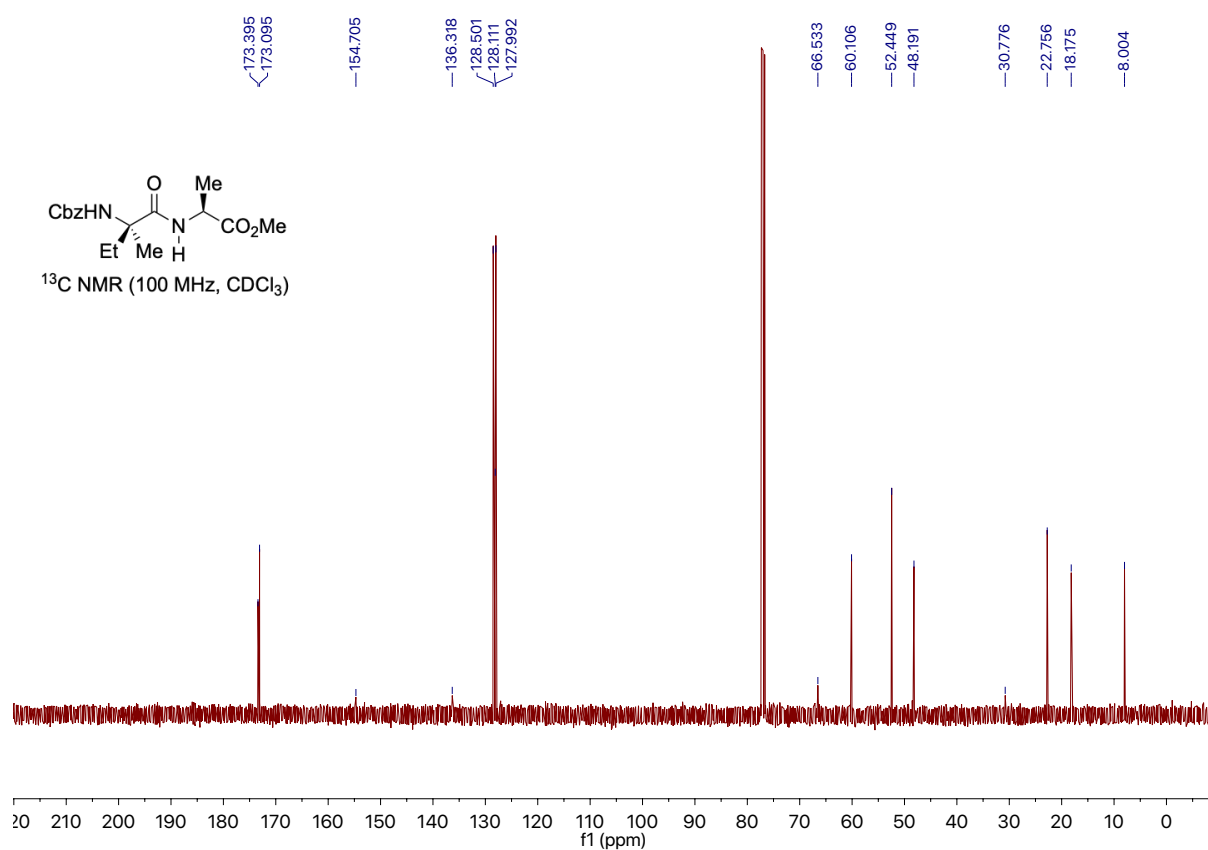

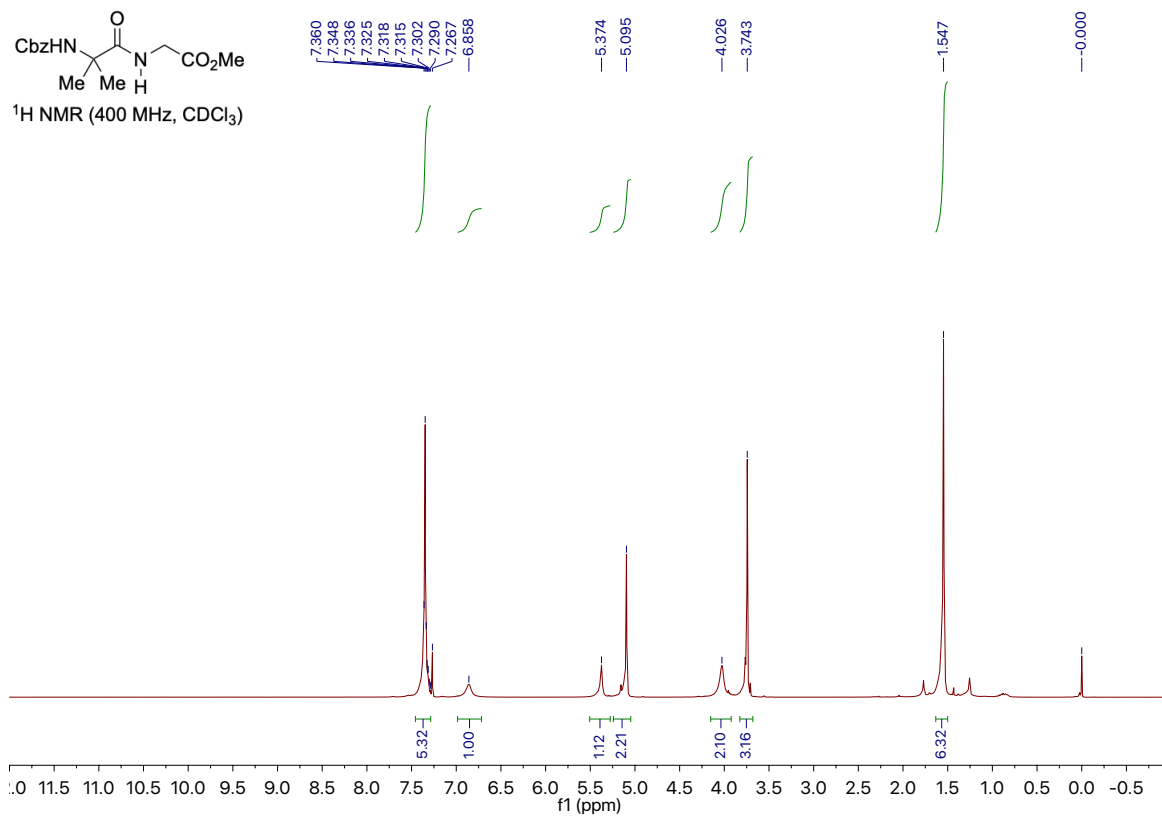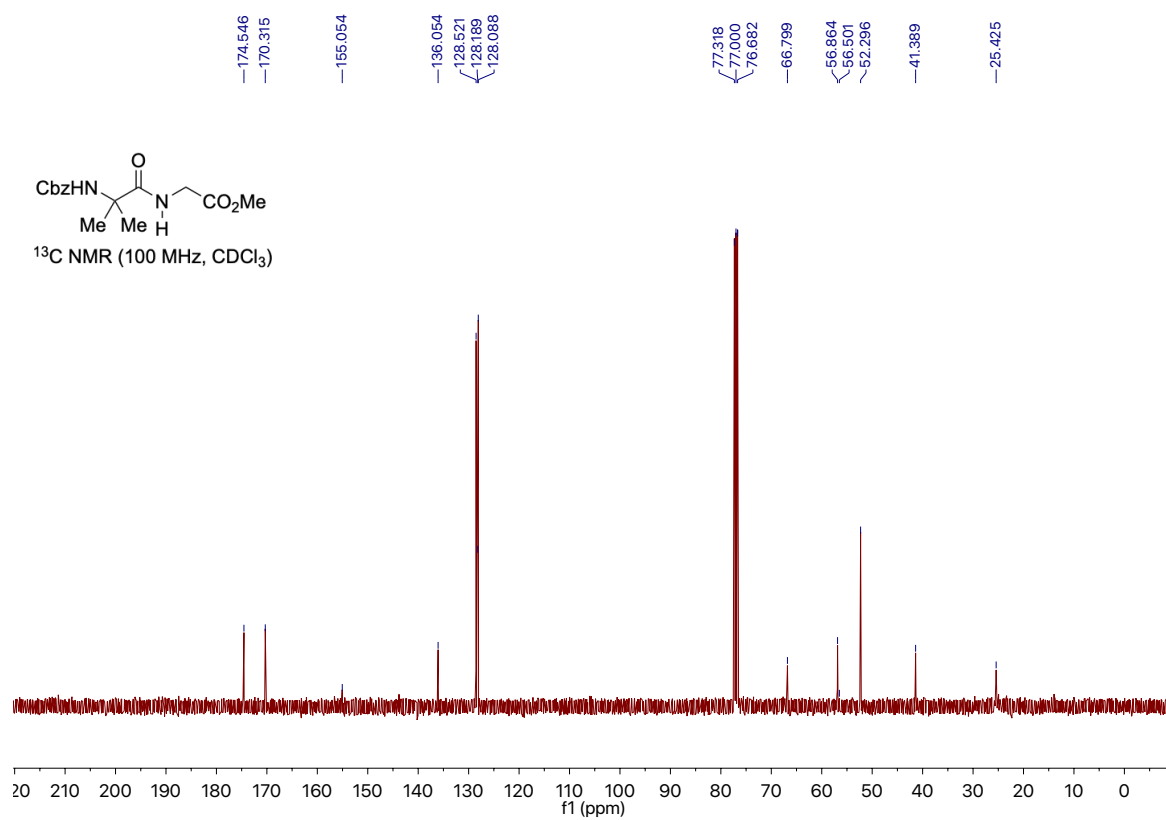

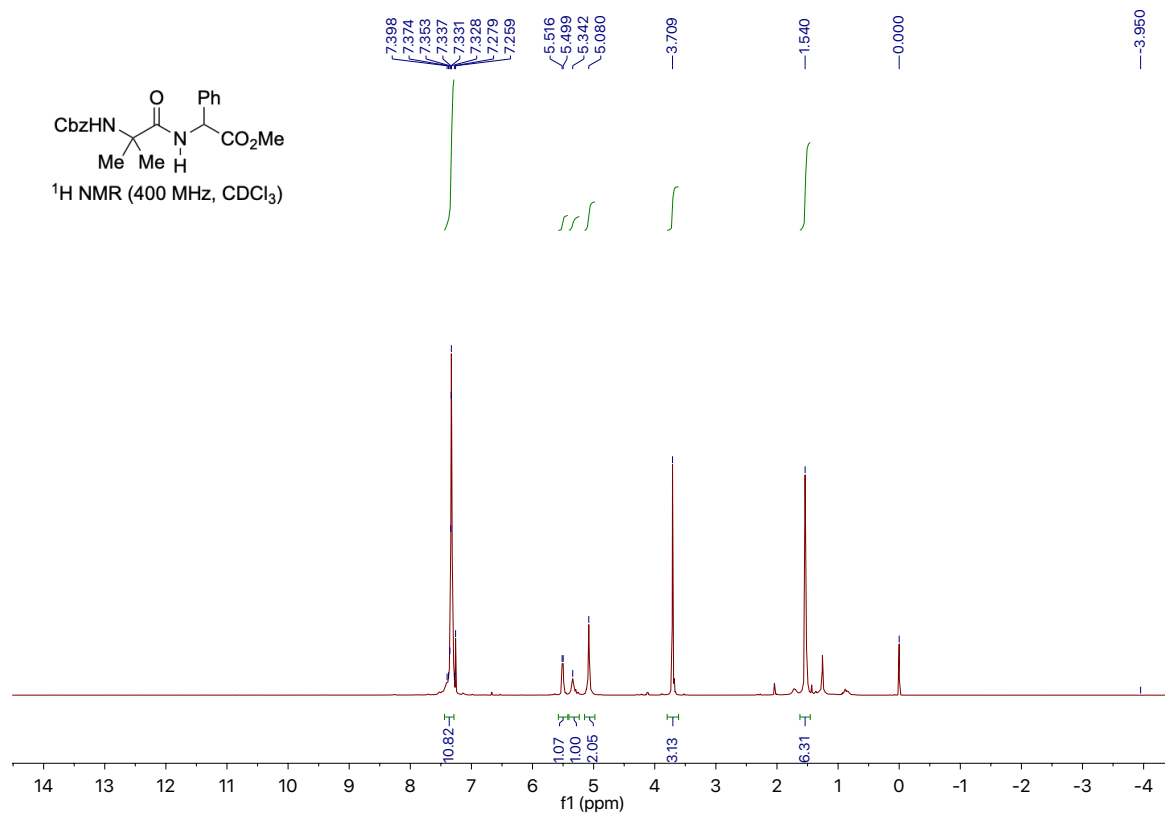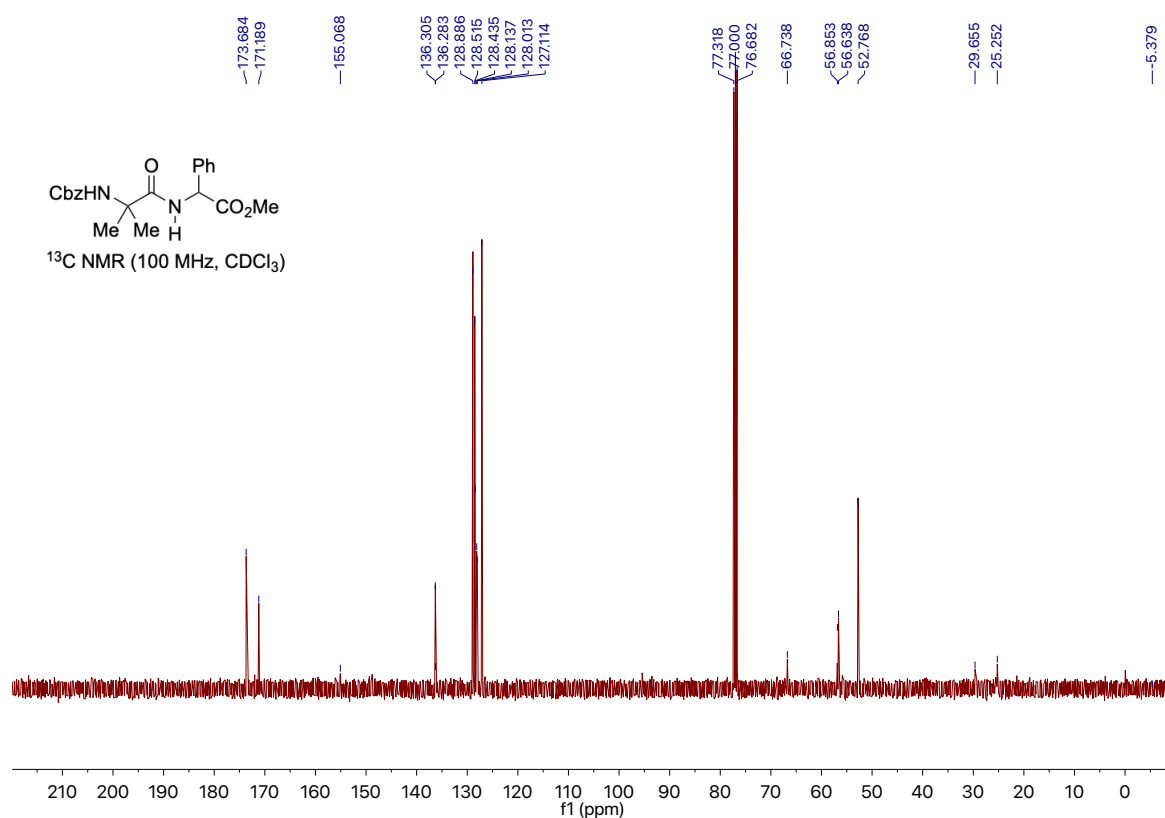

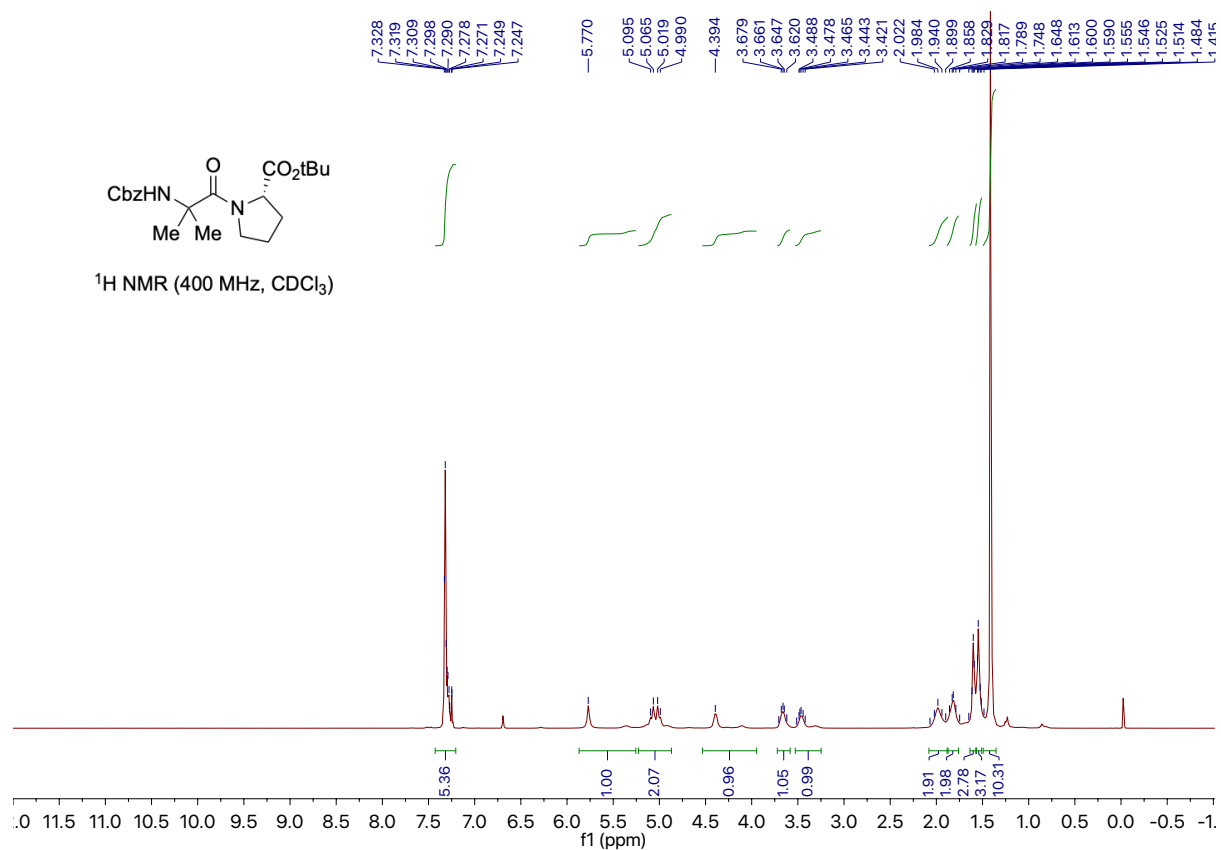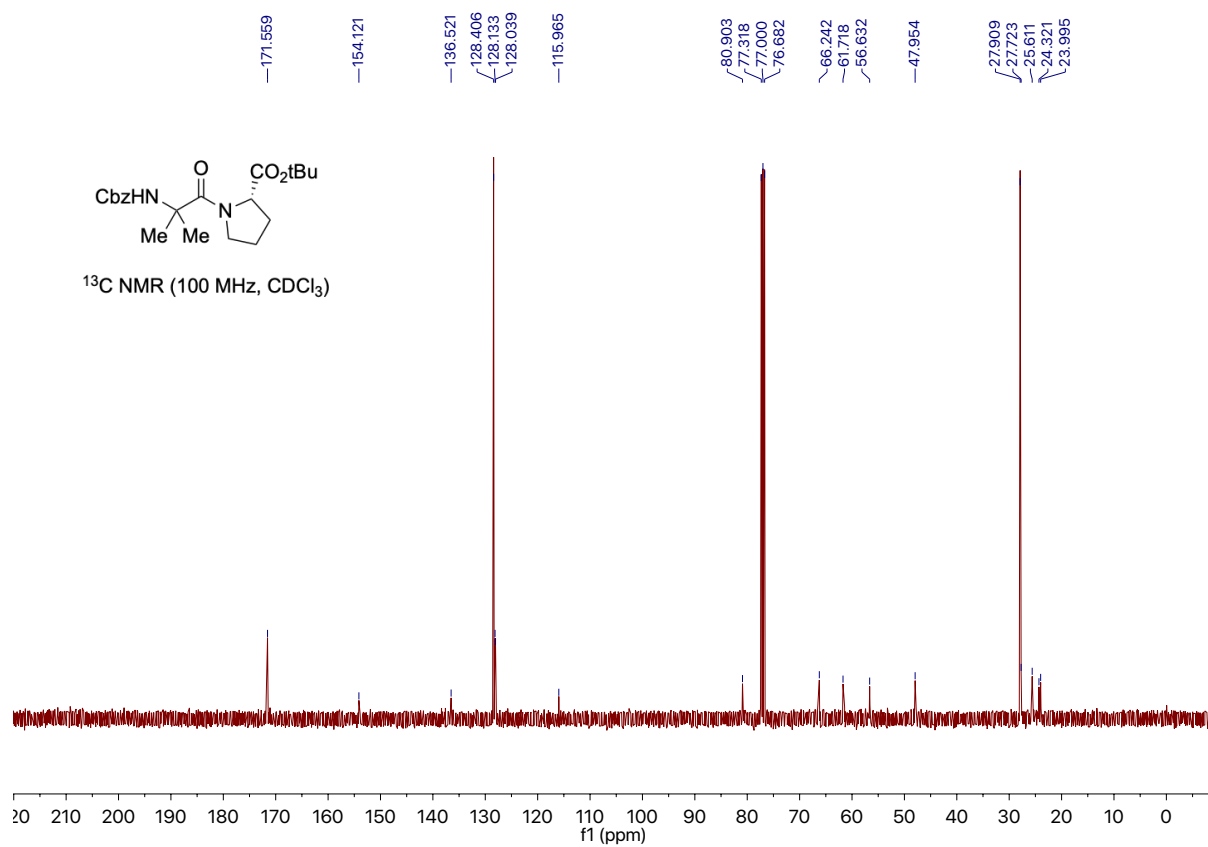

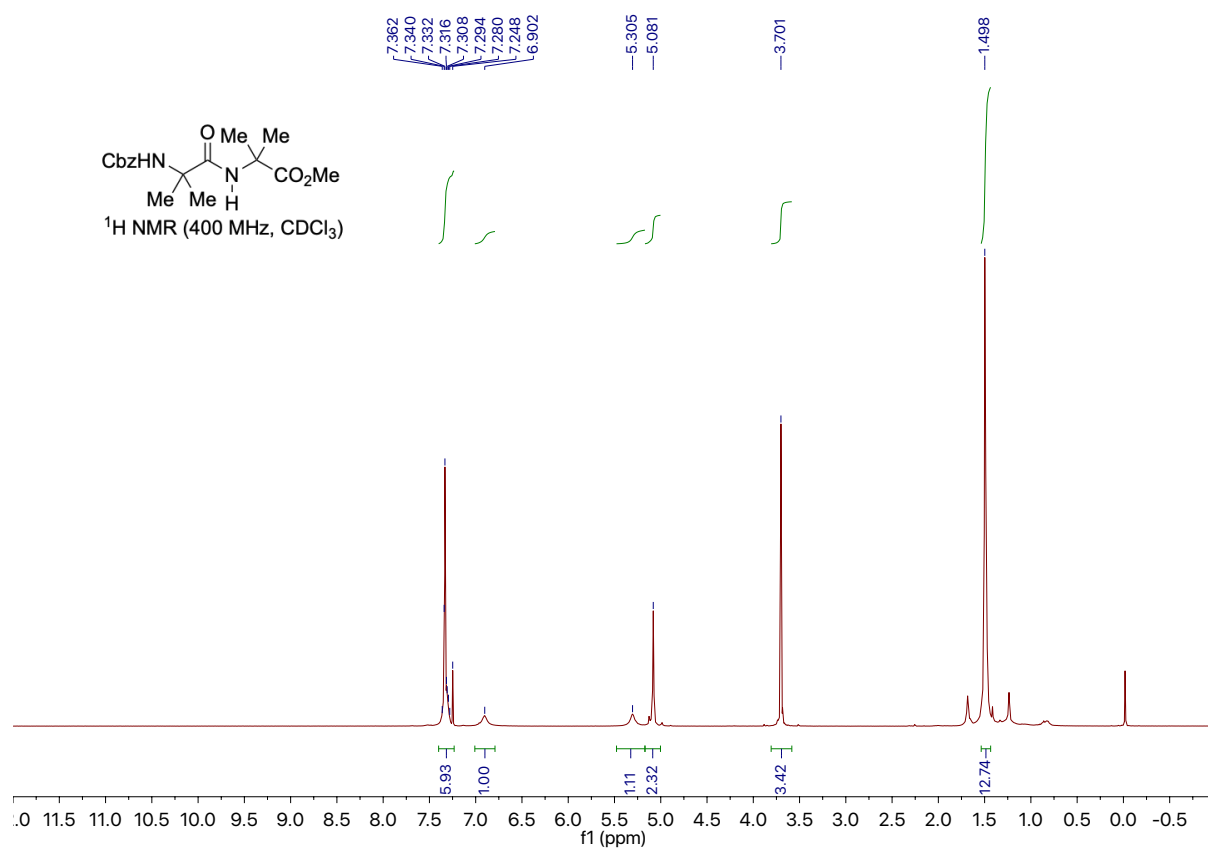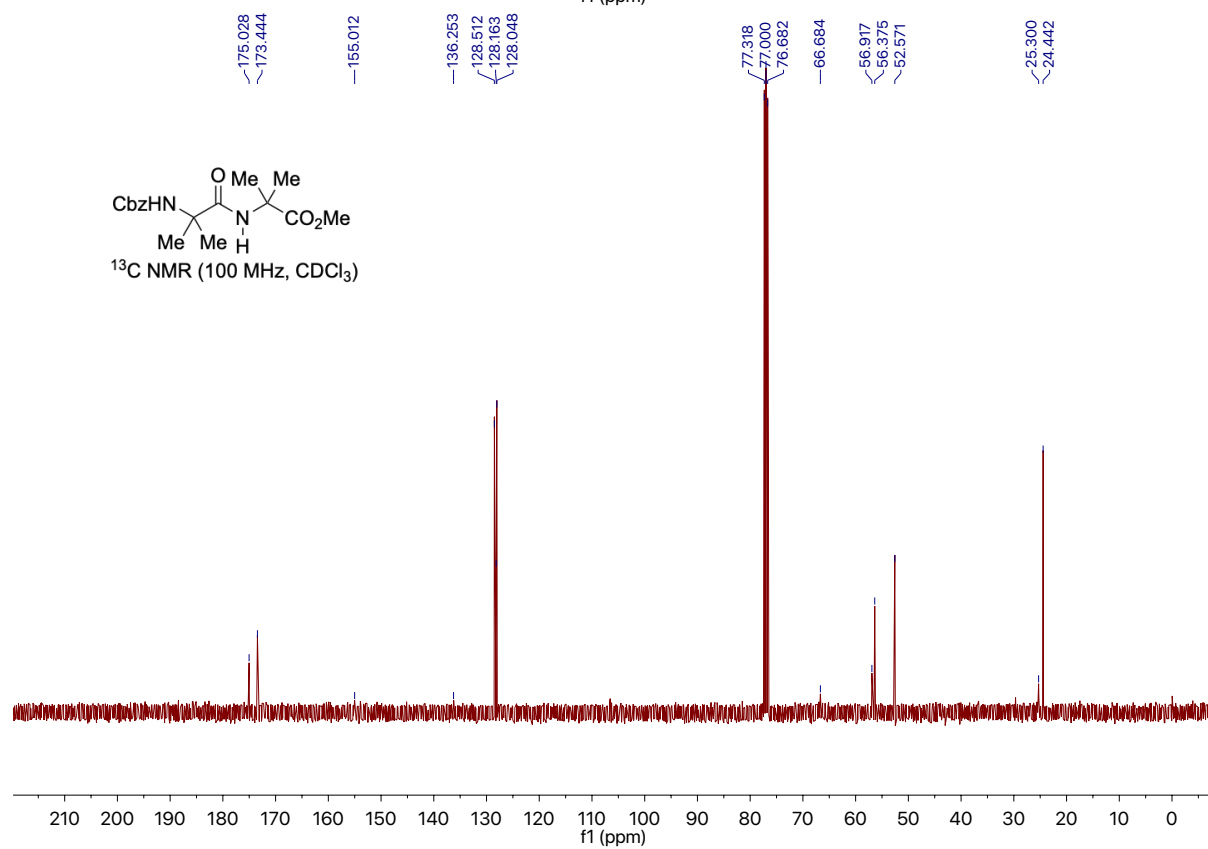

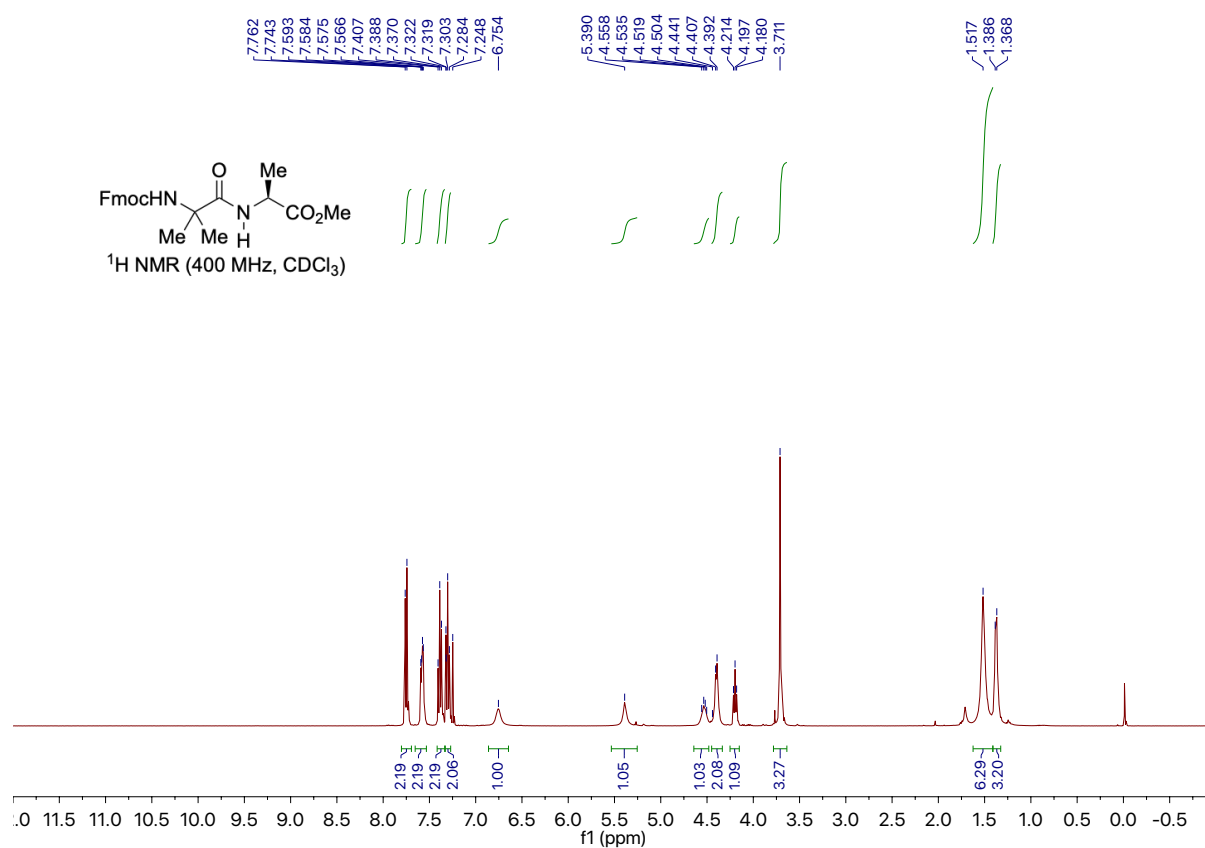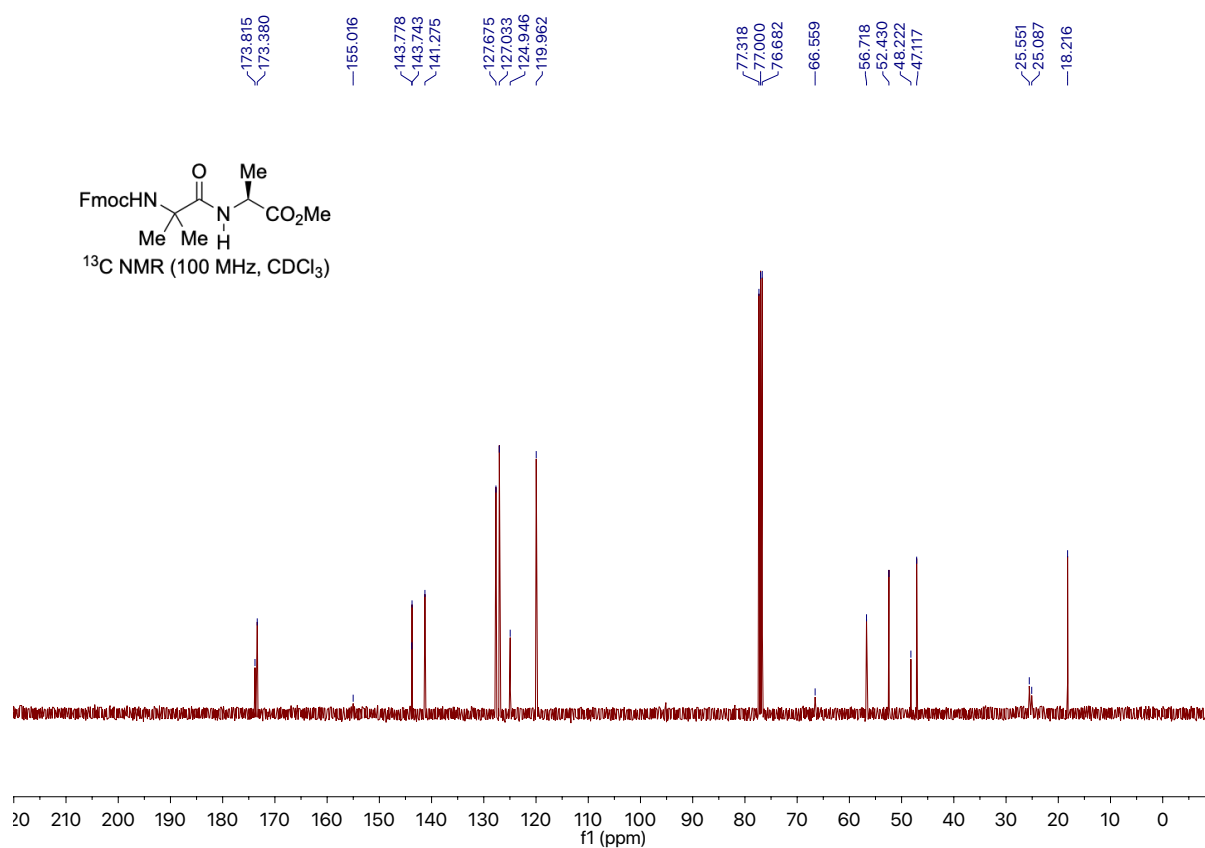

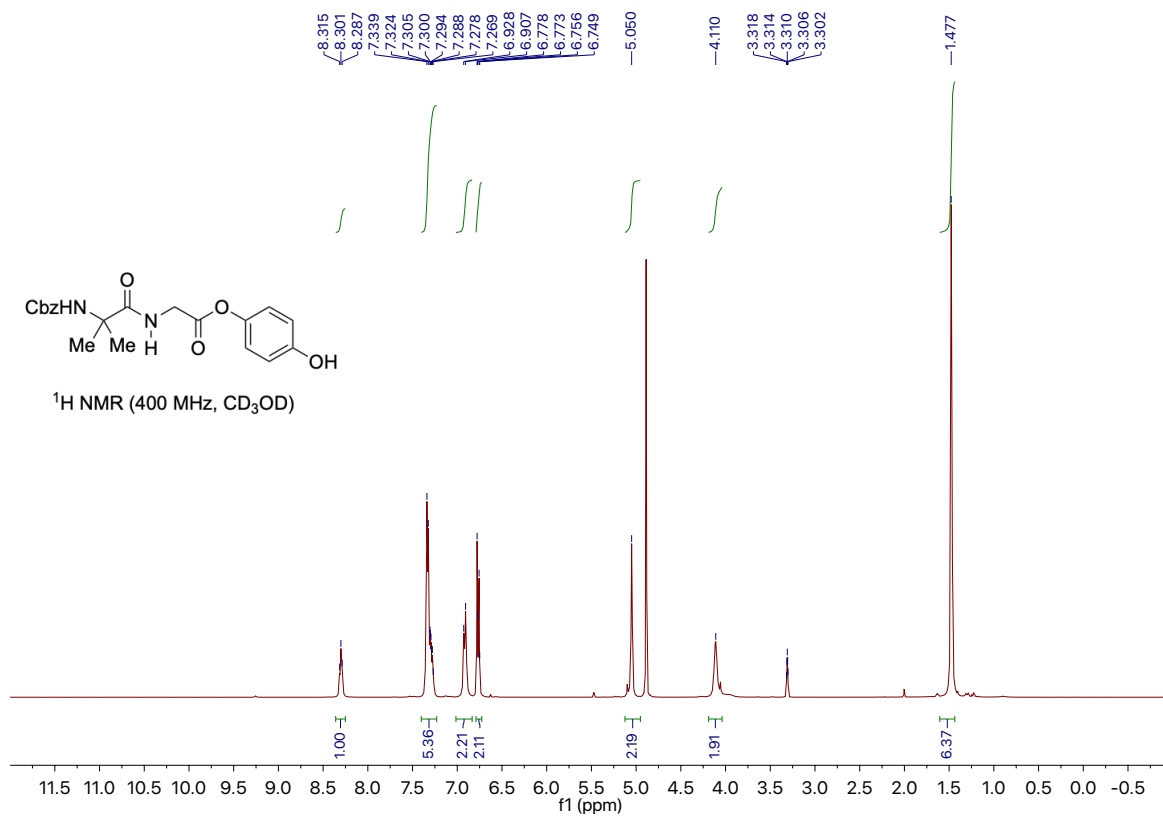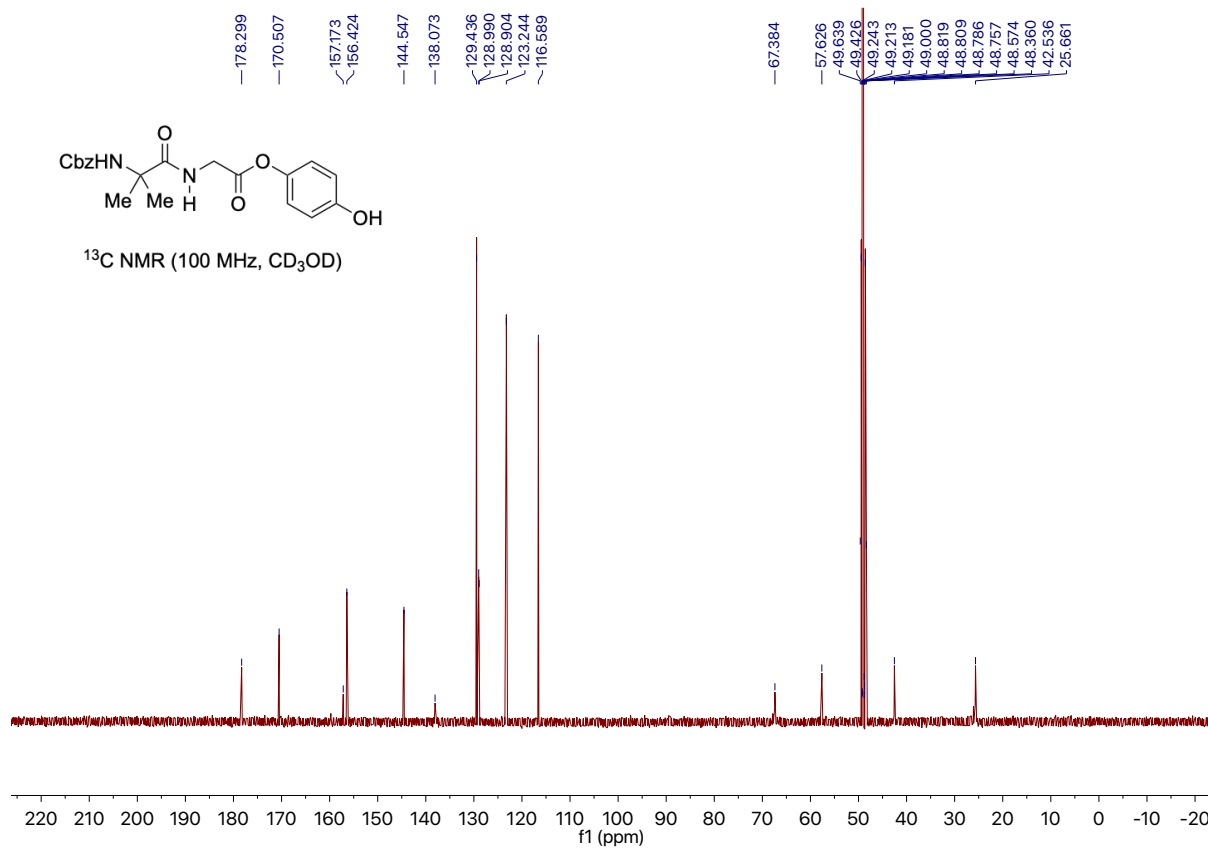

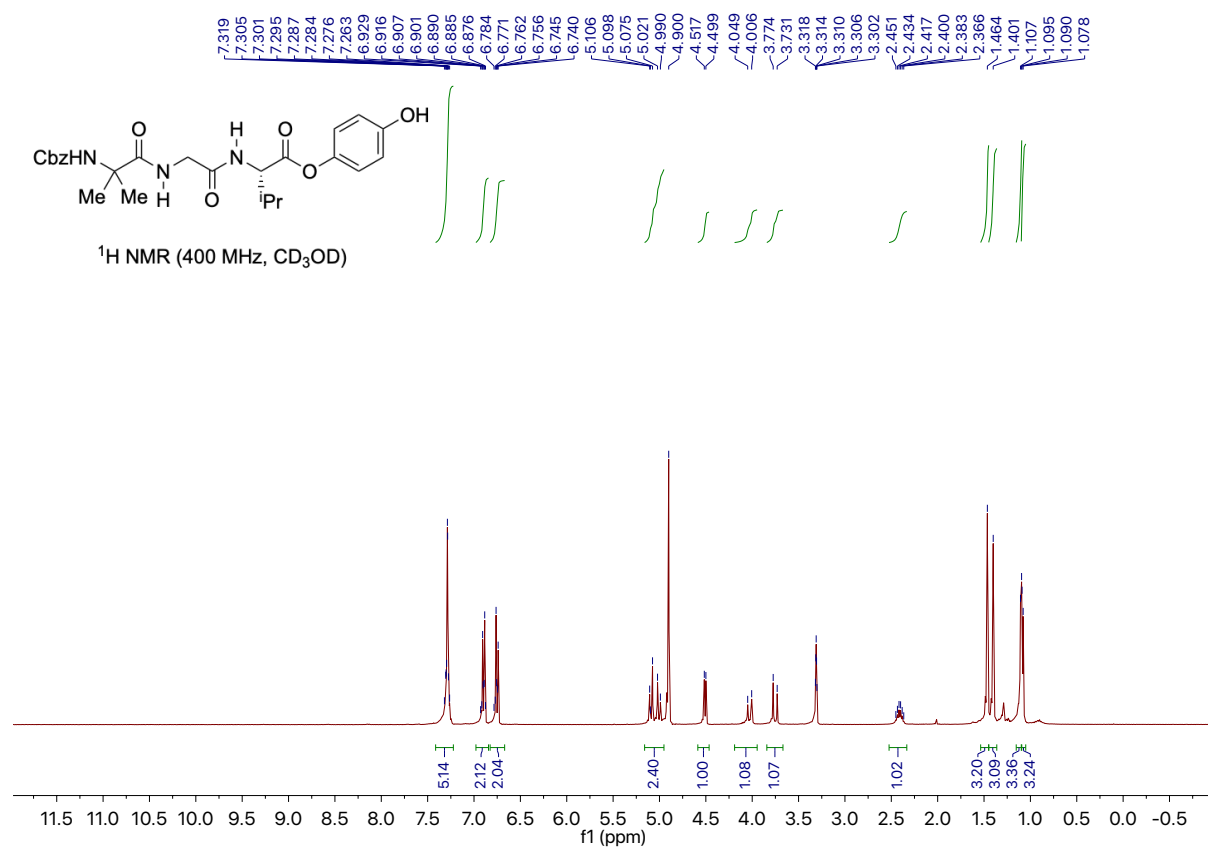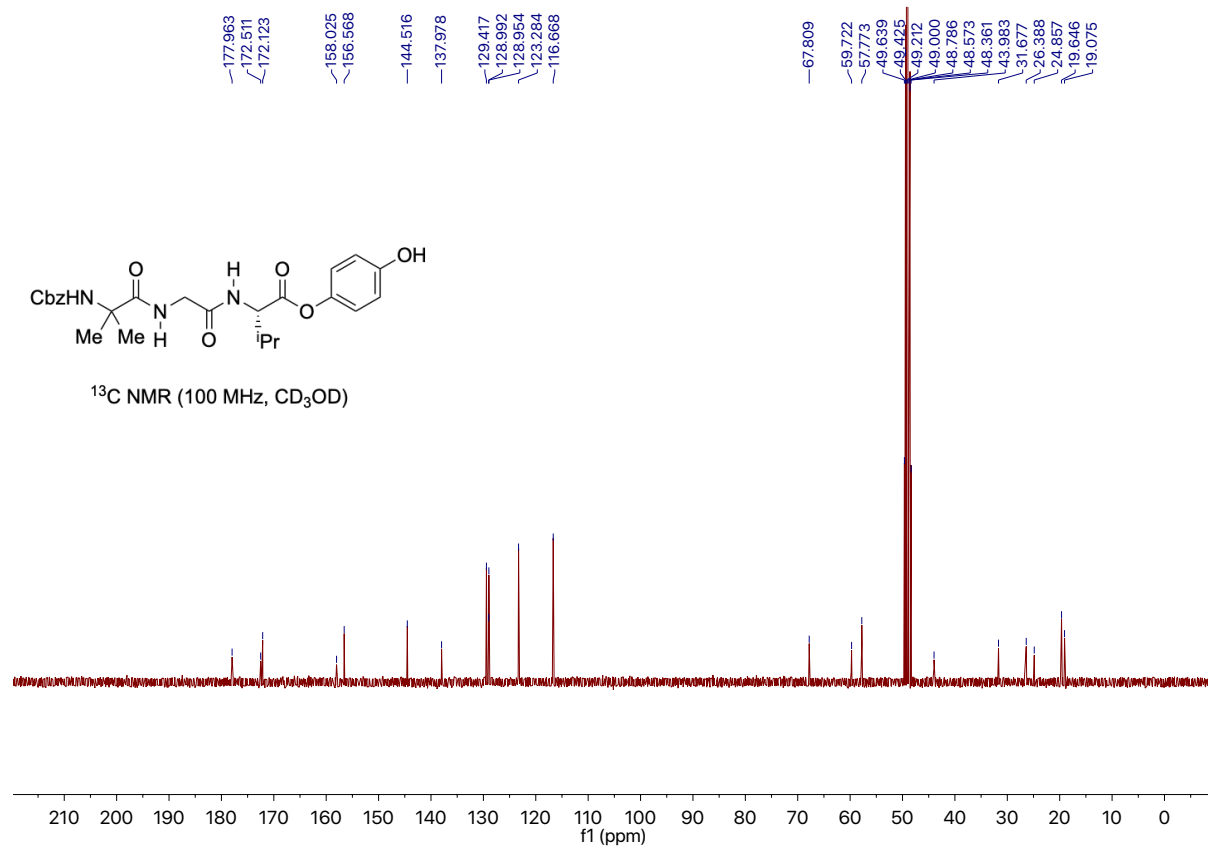

Supplement: d0gc03912h1.pdf [file d0gc03912h1.pdf]
